# Supplementary material
Source: publisher figshare collection journal article supplement (https://acs.figshare.com/ndownloader/files/31081682)
Supplement: Supplementary file 1 [file 31081682]

## Sheet: normal79_z state
Peptide	-10lgP	Mass	Length	ppm	m/z	RT	Area Sample 1	Fraction	Scan	Source File	#Feature	#Feature Sample 1	Accession	PTM	AScore		IEDB
RVDDFKKAFSKEK	56.44	1596.86	13	-1.2	400.222	33.96	57900000	1	20318	200716_dc_IP79_NormalLung-W6Ab_DDA-OTOT-HCD_25cmPepMap2uTT_145m_01.raw	2	2	Q6NZI2|CAVN1_HUMAN				0
KVAPAPAVVKK	56.23	1106.72	11	-0.4	369.913	26.69	46900000	1	15118	200716_dc_IP79_NormalLung-W6Ab_DDA-OTOT-HCD_25cmPepMap2uTT_145m_01.raw	1	1	P62424|RL7A_HUMAN				1
SGVYKKLTGKDVN	55.63	1407.77	13	-0.8	470.264	32.9	36400000	1	19530	200716_dc_IP79_NormalLung-W6Ab_DDA-OTOT-HCD_25cmPepMap2uTT_145m_01.raw	2	2	P62081|RS7_HUMAN				1
HYKVGENADSQIK	55.12	1487.74	13	-0.9	744.875	31.16	284000000	1	18322	200716_dc_IP79_NormalLung-W6Ab_DDA-OTOT-HCD_25cmPepMap2uTT_145m_01.raw	2	2	P07305|H10_HUMAN				1
HAVSEGTKAVTKY	54.15	1389.73	13	-0.5	464.249	30.71	6090000	1	17989	200716_dc_IP79_NormalLung-W6Ab_DDA-OTOT-HCD_25cmPepMap2uTT_145m_01.raw	1	1	P62807|H2B1C_HUMAN:O60814|H2B1K_HUMAN:P57053|H2BFS_HUMAN:Q93079|H2B1H_HUMAN:Q5QNW6|H2B2F_HUMAN:Q16778|H2B2E_HUMAN:P06899|H2B1J_HUMAN:Q99877|H2B1N_HUMAN:P58876|H2B1D_HUMAN:Q99880|H2B1L_HUMAN:P23527|H2B1O_HUMAN:Q8N257|H2B3B_HUMAN:P33778|H2B1B_HUMAN:Q99879|H2B1M_HUMAN:Q96A08|H2B1A_HUMAN				1
HQKISSGKSSPFK	54.06	1429.77	13	-1.1	477.596	26.45	24600000	1	14967	200716_dc_IP79_NormalLung-W6Ab_DDA-OTOT-HCD_25cmPepMap2uTT_145m_01.raw	2	2	O95810|CAVN2_HUMAN				1
RPVINIVHKTL	53.74	1288.8	11	-1.5	430.606	44.47	4910000	1	27803	200716_dc_IP79_NormalLung-W6Ab_DDA-OTOT-HCD_25cmPepMap2uTT_145m_01.raw	1	1	P26006|ITA3_HUMAN				0
HFDLSHGSAQVK	53.63	1324.65	12	-1.3	442.558	36.76	168000000	1	22232	200716_dc_IP79_NormalLung-W6Ab_DDA-OTOT-HCD_25cmPepMap2uTT_145m_01.raw	2	2	P69905|HBA_HUMAN				0
TKKPKATPVKKAK	53.5	1423.92	13	-0.6	475.648	12.57	860000	1	5094	200716_dc_IP79_NormalLung-W6Ab_DDA-OTOT-HCD_25cmPepMap2uTT_145m_01.raw	1	1	P07305|H10_HUMAN				0
HAGEYGAEALER	53.48	1301.6	12	-0.8	651.807	40.88	49900000	1	25196	200716_dc_IP79_NormalLung-W6Ab_DDA-OTOT-HCD_25cmPepMap2uTT_145m_01.raw	2	2	P69905|HBA_HUMAN				1
HLVYESDQNKDGK	53.35	1531.73	13	-0.4	511.583	28.15	16800000	1	16160	200716_dc_IP79_NormalLung-W6Ab_DDA-OTOT-HCD_25cmPepMap2uTT_145m_01.raw	1	1	O43852|CALU_HUMAN				0
RPKTGYSVRVQL	52.83	1402.8	12	-0.5	468.608	43.09	38300000	1	26769	200716_dc_IP79_NormalLung-W6Ab_DDA-OTOT-HCD_25cmPepMap2uTT_145m_01.raw	2	2	P35590|TIE1_HUMAN				0
SLVSKGTLVQTK	52.75	1259.74	12	-1.7	630.879	40.54	1120000000	1	24918	200716_dc_IP79_NormalLung-W6Ab_DDA-OTOT-HCD_25cmPepMap2uTT_145m_01.raw	2	2	P16403|H12_HUMAN:P10412|H14_HUMAN:P16402|H13_HUMAN:P16401|H15_HUMAN:Q02539|H11_HUMAN				1
SNSMQTIQKTTTR	52.51	1494.75	13	-1.7	499.255	33.27	32000000	1	19813	200716_dc_IP79_NormalLung-W6Ab_DDA-OTOT-HCD_25cmPepMap2uTT_145m_01.raw	2	2	P05783|K1C18_HUMAN				0
HVDSLSQRSPK	51.98	1252.65	11	-0.7	418.558	26.68	23100000	1	15095	200716_dc_IP79_NormalLung-W6Ab_DDA-OTOT-HCD_25cmPepMap2uTT_145m_01.raw	1	1	Q9UHD8|SEPT9_HUMAN				0
HRLDLGEDYPSGK	51.56	1485.72	13	-0.8	496.247	42.55	15400000	1	26381	200716_dc_IP79_NormalLung-W6Ab_DDA-OTOT-HCD_25cmPepMap2uTT_145m_01.raw	1	1	O43143|DHX15_HUMAN				1
TFGKKKGPNANS	51.51	1247.66	12	-0.8	624.838	20.99	264000000	1	11114	200716_dc_IP79_NormalLung-W6Ab_DDA-OTOT-HCD_25cmPepMap2uTT_145m_01.raw	2	2	P62861|RS30_HUMAN				1
TVTPAKAVTTPGK	51.1	1269.73	13	-0.7	635.871	32.43	117000000	1	19186	200716_dc_IP79_NormalLung-W6Ab_DDA-OTOT-HCD_25cmPepMap2uTT_145m_01.raw	2	2	P19338|NUCL_HUMAN				0
SAVGHEYVAEVEK	51.05	1416.69	13	-1	473.236	43.19	5340000	1	26908	200716_dc_IP79_NormalLung-W6Ab_DDA-OTOT-HCD_25cmPepMap2uTT_145m_01.raw	2	2	P14317|HCLS1_HUMAN				0
TRILKHGAKDKDD	50.77	1495.81	13	-0.6	374.96	24.63	7900000	1	13568	200716_dc_IP79_NormalLung-W6Ab_DDA-OTOT-HCD_25cmPepMap2uTT_145m_01.raw	2	2	P19105|ML12A_HUMAN:O14950|ML12B_HUMAN:P24844|MYL9_HUMAN				1
HLNDETTSKQIK	50.7	1412.73	12	-1.2	471.915	27.03	2290000	1	15388	200716_dc_IP79_NormalLung-W6Ab_DDA-OTOT-HCD_25cmPepMap2uTT_145m_01.raw	1	1	Q9NUQ9|FA49B_HUMAN				0
SYTTPKKNKHKR	50.61	1486.84	12	-0.7	496.619	12.57	924000	1	5091	200716_dc_IP79_NormalLung-W6Ab_DDA-OTOT-HCD_25cmPepMap2uTT_145m_01.raw	1	1	P62979|RS27A_HUMAN				0
TSSTIKSTPSGK	50.52	1192.63	12	-0.5	597.322	25.56	34600000	1	14328	200716_dc_IP79_NormalLung-W6Ab_DDA-OTOT-HCD_25cmPepMap2uTT_145m_01.raw	2	2	P33241|LSP1_HUMAN				0
SNSM(+15.99)QTIQKTTTR	50.52	1510.74	13	-0.6	504.587	27.33	41700000	1	15554	200716_dc_IP79_NormalLung-W6Ab_DDA-OTOT-HCD_25cmPepMap2uTT_145m_01.raw	1	1	P05783|K1C18_HUMAN	Oxidation (M)	M4:Oxidation (M):1000.00		0
HQVEYLGLKENIR	50.25	1597.86	13	-1	533.626	49.78	12000000	1	31569	200716_dc_IP79_NormalLung-W6Ab_DDA-OTOT-HCD_25cmPepMap2uTT_145m_01.raw	1	1	O00160|MYO1F_HUMAN:Q12965|MYO1E_HUMAN				0
HFELGGDKKRKGQ	50.25	1498.8	13	-0.8	500.607	25.41	54000000	1	14179	200716_dc_IP79_NormalLung-W6Ab_DDA-OTOT-HCD_25cmPepMap2uTT_145m_01.raw	2	2	Q969Q0|RL36L_HUMAN:P83881|RL36A_HUMAN				1
TLVQTKGTGASGS	50.24	1205.63	13	-0.1	603.82	32.04	26700000	1	18967	200716_dc_IP79_NormalLung-W6Ab_DDA-OTOT-HCD_25cmPepMap2uTT_145m_01.raw	1	1	P16403|H12_HUMAN:P10412|H14_HUMAN:P16402|H13_HUMAN:P16401|H15_HUMAN:Q02539|H11_HUMAN				0
HEENLKTKKQQ	50.03	1381.73	11	-0.6	461.584	13.69	2180000	1	5904	200716_dc_IP79_NormalLung-W6Ab_DDA-OTOT-HCD_25cmPepMap2uTT_145m_01.raw	2	2	P42766|RL35_HUMAN				0
HFELGGDKKRKG	49.85	1370.74	12	-0.7	457.921	25.22	6580000	1	14041	200716_dc_IP79_NormalLung-W6Ab_DDA-OTOT-HCD_25cmPepMap2uTT_145m_01.raw	1	1	Q969Q0|RL36L_HUMAN:P83881|RL36A_HUMAN				1
HGLGHGHEQQHG	49.85	1292.58	12	-1	431.865	14.93	1010000	1	6741	200716_dc_IP79_NormalLung-W6Ab_DDA-OTOT-HCD_25cmPepMap2uTT_145m_01.raw	2	2	P01042|KNG1_HUMAN				0
TQGTKIASDGLKG	49.83	1274.68	13	0.7	638.349	33.22	17100000	1	19766	200716_dc_IP79_NormalLung-W6Ab_DDA-OTOT-HCD_25cmPepMap2uTT_145m_01.raw	2	2	P61247|RS3A_HUMAN				0
TPKEAIEGTYIDK	49.78	1463.75	13	-1.4	732.882	46.23	3770000	1	29140	200716_dc_IP79_NormalLung-W6Ab_DDA-OTOT-HCD_25cmPepMap2uTT_145m_01.raw	2	2	P62280|RS11_HUMAN				0
VPAQVHVN(+.98)GGAL	49.42	1161.61	12	-1.1	581.814	53.03	6060000	1	33887	200716_dc_IP79_NormalLung-W6Ab_DDA-OTOT-HCD_25cmPepMap2uTT_145m_01.raw	1	1	Q9HBL0|TENS1_HUMAN	Deamidation (NQ)	N8:Deamidation (NQ):61.77		0
TENSTSAPAAKPK	49.4	1300.66	13	-0.2	434.561	25.66	254000000	1	14361	200716_dc_IP79_NormalLung-W6Ab_DDA-OTOT-HCD_25cmPepMap2uTT_145m_01.raw	2	2	P07305|H10_HUMAN				0
KATGPPVSELITK	49.36	1339.77	13	-0.6	670.893	48.64	69300000	1	30936	200716_dc_IP79_NormalLung-W6Ab_DDA-OTOT-HCD_25cmPepMap2uTT_145m_01.raw	2	2	P16401|H15_HUMAN				1
GTGASGSFKLNK	49.12	1165.61	12	-1.3	583.811	33.71	781000000	1	20165	200716_dc_IP79_NormalLung-W6Ab_DDA-OTOT-HCD_25cmPepMap2uTT_145m_01.raw	2	2	P16403|H12_HUMAN:P10412|H14_HUMAN:P16402|H13_HUMAN:P16401|H15_HUMAN:Q02539|H11_HUMAN				1
RPAETNLRHTC(+119.00)	49.11	1415.64	11	-0.8	472.887	25.9	4900000	1	14551	200716_dc_IP79_NormalLung-W6Ab_DDA-OTOT-HCD_25cmPepMap2uTT_145m_01.raw	1	1	P15104|GLNA_HUMAN	Cysteinylation	C11:Cysteinylation:1000.00		0
TSPAKQQAPPVR	49.11	1278.7	12	-2	640.358	27.86	17900000	1	16004	200716_dc_IP79_NormalLung-W6Ab_DDA-OTOT-HCD_25cmPepMap2uTT_145m_01.raw	2	2	Q16555|DPYL2_HUMAN				1
HLYDPKMQTDKP	49.08	1471.71	12	-0.4	491.578	39.56	25000000	1	24276	200716_dc_IP79_NormalLung-W6Ab_DDA-OTOT-HCD_25cmPepMap2uTT_145m_01.raw	1	1	Q15417|CNN3_HUMAN				1
GTGASGSFKLNKK	48.92	1293.7	13	-1.3	647.859	27.86	43800000	1	16000	200716_dc_IP79_NormalLung-W6Ab_DDA-OTOT-HCD_25cmPepMap2uTT_145m_01.raw	2	2	P16403|H12_HUMAN:P10412|H14_HUMAN:P16402|H13_HUMAN:P16401|H15_HUMAN:Q02539|H11_HUMAN				0
RPALQHVVKVL	48.89	1258.79	11	-1	420.603	45.95	4390000	1	28852	200716_dc_IP79_NormalLung-W6Ab_DDA-OTOT-HCD_25cmPepMap2uTT_145m_01.raw	1	1	O00623|PEX12_HUMAN				1
HDSFLKAVPSQK	48.89	1355.72	12	-1.5	452.913	40.24	20700000	1	24719	200716_dc_IP79_NormalLung-W6Ab_DDA-OTOT-HCD_25cmPepMap2uTT_145m_01.raw	1	1	P31949|S10AB_HUMAN				0
HVNPVQALSEFKA	48.81	1438.76	13	1.4	720.387	68.14	5100000	1	44593	200716_dc_IP79_NormalLung-W6Ab_DDA-OTOT-HCD_25cmPepMap2uTT_145m_01.raw	2	2	P35221|CTNA1_HUMAN				0
KASGPPVSELITK	48.76	1325.76	13	-0.5	663.885	47.46	226000000	1	30026	200716_dc_IP79_NormalLung-W6Ab_DDA-OTOT-HCD_25cmPepMap2uTT_145m_01.raw	2	2	P16403|H12_HUMAN:P10412|H14_HUMAN:P16402|H13_HUMAN				1
TGASGSFKLNK	48.73	1108.59	11	-0.9	555.301	33.14	2870000000	1	19645	200716_dc_IP79_NormalLung-W6Ab_DDA-OTOT-HCD_25cmPepMap2uTT_145m_01.raw	3	3	P16403|H12_HUMAN:P10412|H14_HUMAN:P16402|H13_HUMAN:P16401|H15_HUMAN:Q02539|H11_HUMAN				0
SFVKVYNYNH	48.69	1269.61	10	-1.5	635.813	48.3	19400000	1	30507	200716_dc_IP79_NormalLung-W6Ab_DDA-OTOT-HCD_25cmPepMap2uTT_145m_01.raw	2	2	P61353|RL27_HUMAN				0
RPLDTSLRLKTF	48.63	1445.84	12	-1.8	482.952	55.94	6600000	1	35922	200716_dc_IP79_NormalLung-W6Ab_DDA-OTOT-HCD_25cmPepMap2uTT_145m_01.raw	1	1	O14543|SOCS3_HUMAN				0
TPPKSPGDPSKDR	48.62	1380.7	13	-1.1	461.24	26.69	8720000	1	15069	200716_dc_IP79_NormalLung-W6Ab_DDA-OTOT-HCD_25cmPepMap2uTT_145m_01.raw	1	1	O94811|TPPP_HUMAN				0
HGVAQVRFVTGNK	48.6	1411.77	13	-0.9	471.596	36.91	0	1	22437	200716_dc_IP79_NormalLung-W6Ab_DDA-OTOT-HCD_25cmPepMap2uTT_145m_01.raw	0	0	P62277|RS13_HUMAN				0
TAM(+15.99)AAAKAPTK	48.59	1075.57	11	-1.5	538.791	25.32	19100000	1	14142	200716_dc_IP79_NormalLung-W6Ab_DDA-OTOT-HCD_25cmPepMap2uTT_145m_01.raw	2	2	P83731|RL24_HUMAN	Oxidation (M)	M3:Oxidation (M):1000.00		0
HVFLTGPPGVGK	48.56	1207.67	12	-0.2	604.843	51.35	9050000	1	32699	200716_dc_IP79_NormalLung-W6Ab_DDA-OTOT-HCD_25cmPepMap2uTT_145m_01.raw	2	2	Q9BSD7|NTPCR_HUMAN				0
RLVTTGVLKQTK	48.46	1342.83	12	-0.2	448.617	35.19	26700000	1	21190	200716_dc_IP79_NormalLung-W6Ab_DDA-OTOT-HCD_25cmPepMap2uTT_145m_01.raw	1	1	P07305|H10_HUMAN				0
Q(-17.03)TVAVGVIKAVDK	48.44	1309.76	13	-0.6	655.887	70.17	9970000	1	45942	200716_dc_IP79_NormalLung-W6Ab_DDA-OTOT-HCD_25cmPepMap2uTT_145m_01.raw	1	1	P68104|EF1A1_HUMAN:Q5VTE0|EF1A3_HUMAN	Pyro-glu from Q	Q1:Pyro-glu from Q:1000.00		0
SAKPPAKVEAKPK	48.4	1349.8	13	-2.1	450.941	25.02	26100000	1	13924	200716_dc_IP79_NormalLung-W6Ab_DDA-OTOT-HCD_25cmPepMap2uTT_145m_01.raw	1	1	P05114|HMGN1_HUMAN				0
YYKVDENGKIS	48.23	1314.65	11	-0.5	658.33	42.7	9930000	1	26565	200716_dc_IP79_NormalLung-W6Ab_DDA-OTOT-HCD_25cmPepMap2uTT_145m_01.raw	2	2	P62979|RS27A_HUMAN				0
HGLYEKKKTSR	48.15	1345.75	11	-0.7	449.589	16.14	3910000	1	7556	200716_dc_IP79_NormalLung-W6Ab_DDA-OTOT-HCD_25cmPepMap2uTT_145m_01.raw	1	1	P62847|RS24_HUMAN				0
HGLYEKKKTS	48.08	1189.65	10	-1.9	397.555	15.81	5840000	1	7404	200716_dc_IP79_NormalLung-W6Ab_DDA-OTOT-HCD_25cmPepMap2uTT_145m_01.raw	2	2	P62847|RS24_HUMAN				0
TVKAKPVKASKPK	48	1380.88	13	-1	461.301	16.88	43600000	1	8334	200716_dc_IP79_NormalLung-W6Ab_DDA-OTOT-HCD_25cmPepMap2uTT_145m_01.raw	2	2	P07305|H10_HUMAN				0
HM(+15.99)LKNAESNAELK	47.93	1499.74	13	-1.5	500.92	28.45	10900000	1	16391	200716_dc_IP79_NormalLung-W6Ab_DDA-OTOT-HCD_25cmPepMap2uTT_145m_01.raw	1	1	P18621|RL17_HUMAN	Oxidation (M)	M2:Oxidation (M):1000.00		0
ALAAAGYDVEKNN	47.92	1334.65	13	-1.6	668.33	47.86	7150000	1	30226	200716_dc_IP79_NormalLung-W6Ab_DDA-OTOT-HCD_25cmPepMap2uTT_145m_01.raw	1	1	P16403|H12_HUMAN:P10412|H14_HUMAN:P16402|H13_HUMAN:Q02539|H11_HUMAN:P22492|H1T_HUMAN				0
TKTPGPGAQSALR	47.92	1282.7	13	-1.6	428.573	32.08	7050000	1	18978	200716_dc_IP79_NormalLung-W6Ab_DDA-OTOT-HCD_25cmPepMap2uTT_145m_01.raw	1	1	P62263|RS14_HUMAN				1
HLTDAYFKKKKL	47.88	1490.86	12	-1.4	497.96	35.09	2700000	1	21194	200716_dc_IP79_NormalLung-W6Ab_DDA-OTOT-HCD_25cmPepMap2uTT_145m_01.raw	1	1	Q02878|RL6_HUMAN				0
KAKKPAAATVTK	47.86	1212.76	12	-1	607.384	16.1	45100000	1	7606	200716_dc_IP79_NormalLung-W6Ab_DDA-OTOT-HCD_25cmPepMap2uTT_145m_01.raw	2	2	P16403|H12_HUMAN				1
TDTSRYTGSHKER	47.83	1536.73	13	-1.2	513.249	25.32	19600000	1	14119	200716_dc_IP79_NormalLung-W6Ab_DDA-OTOT-HCD_25cmPepMap2uTT_145m_01.raw	1	1	Q9BW30|TPPP3_HUMAN				0
SYSFDEIRKNAQ	47.77	1456.69	12	0.1	729.355	52.24	29400000	1	33292	200716_dc_IP79_NormalLung-W6Ab_DDA-OTOT-HCD_25cmPepMap2uTT_145m_01.raw	2	2	P43490|NAMPT_HUMAN				0
TKYLKDVTLQK	47.73	1335.78	11	-2	446.265	40.14	9150000	1	24686	200716_dc_IP79_NormalLung-W6Ab_DDA-OTOT-HCD_25cmPepMap2uTT_145m_01.raw	1	1	P18621|RL17_HUMAN				0
FGGPGTASRPSSS	47.6	1206.56	13	-0.9	604.288	35.33	204000000	1	21497	200716_dc_IP79_NormalLung-W6Ab_DDA-OTOT-HCD_25cmPepMap2uTT_145m_01.raw	3	3	P08670|VIME_HUMAN				1
TDQAQKAEGAGDA	47.54	1260.56	13	-1.6	631.285	27.96	7000000	1	16039	200716_dc_IP79_NormalLung-W6Ab_DDA-OTOT-HCD_25cmPepMap2uTT_145m_01.raw	1	1	P05204|HMGN2_HUMAN				1
LPKKTESHHKA	47.51	1274.71	11	-0.5	638.362	12.77	14800000	1	5227	200716_dc_IP79_NormalLung-W6Ab_DDA-OTOT-HCD_25cmPepMap2uTT_145m_01.raw	2	2	P20671|H2A1D_HUMAN:P04908|H2A1B_HUMAN:Q93077|H2A1C_HUMAN:Q7L7L0|H2A3_HUMAN:P0C0S8|H2A1_HUMAN:Q6FI13|H2A2A_HUMAN:Q96KK5|H2A1H_HUMAN				0
HPSKVVITRLK	47.47	1276.8	11	-0.8	426.606	29.29	7970000	1	17012	200716_dc_IP79_NormalLung-W6Ab_DDA-OTOT-HCD_25cmPepMap2uTT_145m_01.raw	1	1	P61254|RL26_HUMAN:Q9UNX3|RL26L_HUMAN				0
ARVITEEEKNFKA	47.46	1533.82	13	-1	512.278	40.09	3600000	1	24691	200716_dc_IP79_NormalLung-W6Ab_DDA-OTOT-HCD_25cmPepMap2uTT_145m_01.raw	1	1	P26373|RL13_HUMAN				0
EEMNYIKDVRA	47.35	1366.65	11	-1	684.334	52.44	20300000	1	33426	200716_dc_IP79_NormalLung-W6Ab_DDA-OTOT-HCD_25cmPepMap2uTT_145m_01.raw	2	2	P0CAP1|MYZAP_HUMAN				0
TESHHKAKGK	47.32	1121.59	10	-0.5	561.804	8.13	8860000	1	2204	200716_dc_IP79_NormalLung-W6Ab_DDA-OTOT-HCD_25cmPepMap2uTT_145m_01.raw	2	2	P20671|H2A1D_HUMAN:P04908|H2A1B_HUMAN:Q93077|H2A1C_HUMAN:Q7L7L0|H2A3_HUMAN:P0C0S8|H2A1_HUMAN:Q6FI13|H2A2A_HUMAN				0
SSSTNPFRPQK	47.31	1247.63	11	-1.2	624.819	32.13	22300000	1	18964	200716_dc_IP79_NormalLung-W6Ab_DDA-OTOT-HCD_25cmPepMap2uTT_145m_01.raw	2	2	P63218|GBG5_HUMAN				1
FM(+15.99)GKVVNPTQK	47.28	1263.66	11	-1.3	632.839	33.76	37900000	1	20149	200716_dc_IP79_NormalLung-W6Ab_DDA-OTOT-HCD_25cmPepMap2uTT_145m_01.raw	2	2	P01009|A1AT_HUMAN	Oxidation (M)	M2:Oxidation (M):1000.00		0
TQGTKIASDGLK	47.23	1217.66	12	-0.6	609.838	31.94	12800000	1	18859	200716_dc_IP79_NormalLung-W6Ab_DDA-OTOT-HCD_25cmPepMap2uTT_145m_01.raw	2	2	P61247|RS3A_HUMAN				1
TPSYEIRAVGNK	47.22	1333.7	12	-0.3	667.857	41.76	20200000	1	25832	200716_dc_IP79_NormalLung-W6Ab_DDA-OTOT-HCD_25cmPepMap2uTT_145m_01.raw	2	2	Q08211|DHX9_HUMAN				0
TSNHQKISSGK	47.12	1185.61	11	-0.5	593.812	12.86	955000	1	5327	200716_dc_IP79_NormalLung-W6Ab_DDA-OTOT-HCD_25cmPepMap2uTT_145m_01.raw	2	2	O95810|CAVN2_HUMAN				0
SPLFM(+15.99)GKVVNPTQ	47.12	1432.74	13	0	717.376	59.5	2960000	1	38410	200716_dc_IP79_NormalLung-W6Ab_DDA-OTOT-HCD_25cmPepMap2uTT_145m_01.raw	1	1	P01009|A1AT_HUMAN	Oxidation (M)	M5:Oxidation (M):1000.00		0
GFTAQVIILNHP	47.1	1308.72	12	-1.6	655.366	78.06	7410000	1	51328	200716_dc_IP79_NormalLung-W6Ab_DDA-OTOT-HCD_25cmPepMap2uTT_145m_01.raw	1	1	P68104|EF1A1_HUMAN:Q5VTE0|EF1A3_HUMAN				0
TVAVGVIKAVDK	47.09	1198.73	12	-0.1	600.371	48.4	150000000	1	30517	200716_dc_IP79_NormalLung-W6Ab_DDA-OTOT-HCD_25cmPepMap2uTT_145m_01.raw	2	2	P68104|EF1A1_HUMAN:Q5VTE0|EF1A3_HUMAN				1
SSARPGGLGSSS	47.08	1061.51	12	-0.7	531.762	30.08	23800000	1	17534	200716_dc_IP79_NormalLung-W6Ab_DDA-OTOT-HCD_25cmPepMap2uTT_145m_01.raw	1	1	P08729|K2C7_HUMAN				0
TDGKVFQFLNAK	47.06	1366.72	12	-2.4	456.581	64.52	18200000	1	41985	200716_dc_IP79_NormalLung-W6Ab_DDA-OTOT-HCD_25cmPepMap2uTT_145m_01.raw	2	2	P83731|RL24_HUMAN				1
SHYSGLKHEDK	47.04	1299.62	11	-0.9	434.214	24.17	8070000	1	13300	200716_dc_IP79_NormalLung-W6Ab_DDA-OTOT-HCD_25cmPepMap2uTT_145m_01.raw	1	1	Q8NC51|PAIRB_HUMAN				0
RPWVSGHRKL	47	1234.7	10	-2.3	412.575	28.7	6710000	1	16570	200716_dc_IP79_NormalLung-W6Ab_DDA-OTOT-HCD_25cmPepMap2uTT_145m_01.raw	1	1	P00488|F13A_HUMAN				0
GTKPKKPVGAAK	46.98	1180.73	12	-1	394.583	14.31	3390000	1	6282	200716_dc_IP79_NormalLung-W6Ab_DDA-OTOT-HCD_25cmPepMap2uTT_145m_01.raw	2	2	P16403|H12_HUMAN				0
APRPDSRHHSL	46.89	1271.65	11	-0.5	424.89	25.71	24900000	1	14433	200716_dc_IP79_NormalLung-W6Ab_DDA-OTOT-HCD_25cmPepMap2uTT_145m_01.raw	1	1	Q9BSV6|SEN34_HUMAN				1
GQGYLIKDGKLIK	46.86	1431.84	13	-1.6	716.928	45.11	33200000	1	28291	200716_dc_IP79_NormalLung-W6Ab_DDA-OTOT-HCD_25cmPepMap2uTT_145m_01.raw	2	2	P39023|RL3_HUMAN				0
PDPAKSAPAPK	46.85	1077.58	11	-1.4	539.797	27.57	41700000	1	15779	200716_dc_IP79_NormalLung-W6Ab_DDA-OTOT-HCD_25cmPepMap2uTT_145m_01.raw	2	2	Q93079|H2B1H_HUMAN:Q5QNW6|H2B2F_HUMAN:P23527|H2B1O_HUMAN				1
TSDDVKEQIYK	46.81	1324.65	11	-1.6	663.332	38.33	749000	1	23474	200716_dc_IP79_NormalLung-W6Ab_DDA-OTOT-HCD_25cmPepMap2uTT_145m_01.raw	1	1	P62277|RS13_HUMAN				0
TM(+15.99)VADTPENLRLK	46.81	1502.78	13	-0.4	501.933	48.55	4860000	1	30730	200716_dc_IP79_NormalLung-W6Ab_DDA-OTOT-HCD_25cmPepMap2uTT_145m_01.raw	1	1	Q14847|LASP1_HUMAN	Oxidation (M)	M2:Oxidation (M):1000.00		0
KVVNPLFEKRPK	46.81	1453.88	12	-1.5	485.632	35.43	7260000	1	21365	200716_dc_IP79_NormalLung-W6Ab_DDA-OTOT-HCD_25cmPepMap2uTT_145m_01.raw	2	2	P62424|RL7A_HUMAN				0
TGQWHSESGSFRP	46.8	1474.66	13	-2.4	738.335	44.57	16500000	1	27876	200716_dc_IP79_NormalLung-W6Ab_DDA-OTOT-HCD_25cmPepMap2uTT_145m_01.raw	2	2	P02671|FIBA_HUMAN				0
SSPFKVSPLTFGR	46.69	1421.77	13	-1.4	474.929	68.74	10800000	1	44994	200716_dc_IP79_NormalLung-W6Ab_DDA-OTOT-HCD_25cmPepMap2uTT_145m_01.raw	2	2	O95810|CAVN2_HUMAN				0
AVVVKKIETRDGK	46.51	1441.86	13	-1.3	481.627	27.48	3920000	1	15706	200716_dc_IP79_NormalLung-W6Ab_DDA-OTOT-HCD_25cmPepMap2uTT_145m_01.raw	1	1	P05787|K2C8_HUMAN				0
HNLGHGHKHER	46.47	1320.65	11	-0.9	441.225	12.31	2940000	1	4925	200716_dc_IP79_NormalLung-W6Ab_DDA-OTOT-HCD_25cmPepMap2uTT_145m_01.raw	2	2	P01042|KNG1_HUMAN				0
SIRDTPAKNAQK	46.47	1327.72	12	-0.7	443.581	25.51	35300000	1	14232	200716_dc_IP79_NormalLung-W6Ab_DDA-OTOT-HCD_25cmPepMap2uTT_145m_01.raw	1	1	P06748|NPM_HUMAN				1
SGSTGQWHSESGS	46.47	1305.52	13	-0.9	653.768	31.94	2530000	1	18906	200716_dc_IP79_NormalLung-W6Ab_DDA-OTOT-HCD_25cmPepMap2uTT_145m_01.raw	1	1	P02671|FIBA_HUMAN				0
QTVAVGVIKAVDK	46.43	1326.79	13	-0.7	443.269	51.59	19100000	1	32834	200716_dc_IP79_NormalLung-W6Ab_DDA-OTOT-HCD_25cmPepMap2uTT_145m_01.raw	2	2	P68104|EF1A1_HUMAN:Q5VTE0|EF1A3_HUMAN				1
TNVKAAWGKVGA	46.37	1200.66	12	-1.4	601.337	43.34	13500000	1	27008	200716_dc_IP79_NormalLung-W6Ab_DDA-OTOT-HCD_25cmPepMap2uTT_145m_01.raw	2	2	P69905|HBA_HUMAN				0
ASGPPVSELITK	46.29	1197.66	12	0.4	599.838	58.41	88100000	1	37757	200716_dc_IP79_NormalLung-W6Ab_DDA-OTOT-HCD_25cmPepMap2uTT_145m_01.raw	2	2	P16403|H12_HUMAN:P10412|H14_HUMAN:P16402|H13_HUMAN				1
HRAQVIYTR	46.21	1142.63	9	-1.3	381.884	27.86	9260000	1	15987	200716_dc_IP79_NormalLung-W6Ab_DDA-OTOT-HCD_25cmPepMap2uTT_145m_01.raw	1	1	P62851|RS25_HUMAN				1
KYELGRPAANTK	46.18	1346.73	12	-0.9	449.917	30.03	12000000	1	17503	200716_dc_IP79_NormalLung-W6Ab_DDA-OTOT-HCD_25cmPepMap2uTT_145m_01.raw	1	1	P62241|RS8_HUMAN				1
APRPSTGPHKL	46.17	1159.65	11	-0.3	387.556	26.93	25300000	1	15300	200716_dc_IP79_NormalLung-W6Ab_DDA-OTOT-HCD_25cmPepMap2uTT_145m_01.raw	1	1	P62701|RS4X_HUMAN:Q8TD47|RS4Y2_HUMAN:P22090|RS4Y1_HUMAN				1
TPKGNRPVILTY	46.1	1357.77	12	-1.6	679.892	48.7	23200000	1	30786	200716_dc_IP79_NormalLung-W6Ab_DDA-OTOT-HCD_25cmPepMap2uTT_145m_01.raw	2	2	Q92597|NDRG1_HUMAN				0
HGKPTDSTPATWK	46.09	1424.7	13	-0.3	475.909	31.35	3760000	1	18501	200716_dc_IP79_NormalLung-W6Ab_DDA-OTOT-HCD_25cmPepMap2uTT_145m_01.raw	1	1	O60832|DKC1_HUMAN				0
TYFQAKIRALK	46.03	1337.78	11	0	446.935	45.95	76800000	1	28776	200716_dc_IP79_NormalLung-W6Ab_DDA-OTOT-HCD_25cmPepMap2uTT_145m_01.raw	2	2	O00391|QSOX1_HUMAN				0
AAAGYDVEKNNS	46.01	1237.56	12	-1.6	619.785	33.95	6320000	1	20293	200716_dc_IP79_NormalLung-W6Ab_DDA-OTOT-HCD_25cmPepMap2uTT_145m_01.raw	1	1	P16403|H12_HUMAN:P10412|H14_HUMAN:P16402|H13_HUMAN:Q02539|H11_HUMAN:P22492|H1T_HUMAN				0
TETQEKNPLPSKE	45.93	1499.75	13	-0.8	500.923	33.2	67600000	1	19957	200716_dc_IP79_NormalLung-W6Ab_DDA-OTOT-HCD_25cmPepMap2uTT_145m_01.raw	1	1	P62328|TYB4_HUMAN				1
KVAPAPAVVK	45.92	978.623	10	-0.5	490.318	30.18	9340000	1	17625	200716_dc_IP79_NormalLung-W6Ab_DDA-OTOT-HCD_25cmPepMap2uTT_145m_01.raw	1	1	P62424|RL7A_HUMAN				1
YYKVDENGKISR	45.84	1470.75	12	-1.8	491.255	38.43	29800000	1	23430	200716_dc_IP79_NormalLung-W6Ab_DDA-OTOT-HCD_25cmPepMap2uTT_145m_01.raw	1	1	P62979|RS27A_HUMAN				1
LPKGDINIEGPSM(+15.99)	45.76	1385.69	13	-1.2	693.85	56.83	17300000	1	36474	200716_dc_IP79_NormalLung-W6Ab_DDA-OTOT-HCD_25cmPepMap2uTT_145m_01.raw	1	1	Q09666|AHNK_HUMAN	Oxidation (M)	M13:Oxidation (M):1000.00		0
SPFKVSPLTFGR	45.75	1334.73	12	-1.2	445.918	67.35	6980000	1	44022	200716_dc_IP79_NormalLung-W6Ab_DDA-OTOT-HCD_25cmPepMap2uTT_145m_01.raw	2	2	O95810|CAVN2_HUMAN				0
HAAENPGKYN	45.75	1099.5	10	-0.9	550.759	25.81	4640000	1	14498	200716_dc_IP79_NormalLung-W6Ab_DDA-OTOT-HCD_25cmPepMap2uTT_145m_01.raw	1	1	Q00839|HNRPU_HUMAN				0
TPSRQPPLPHR	45.74	1284.71	11	-1	429.242	30.77	6610000	1	18006	200716_dc_IP79_NormalLung-W6Ab_DDA-OTOT-HCD_25cmPepMap2uTT_145m_01.raw	1	1	Q07666|KHDR1_HUMAN				1
SGPPVSELITK	45.71	1126.62	11	-1.8	564.318	57.13	1660000000	1	36775	200716_dc_IP79_NormalLung-W6Ab_DDA-OTOT-HCD_25cmPepMap2uTT_145m_01.raw	2	2	P16403|H12_HUMAN:P10412|H14_HUMAN:P16402|H13_HUMAN				1
SPNQARAQAAL	45.63	1125.59	11	-0.6	563.802	35.78	23400000	1	21596	200716_dc_IP79_NormalLung-W6Ab_DDA-OTOT-HCD_25cmPepMap2uTT_145m_01.raw	1	1	P26599|PTBP1_HUMAN				1
HVAYGGYSTPEDR	45.62	1450.65	13	-0.2	484.556	41.55	3280000	1	25737	200716_dc_IP79_NormalLung-W6Ab_DDA-OTOT-HCD_25cmPepMap2uTT_145m_01.raw	1	1	Q9HBL0|TENS1_HUMAN				0
FVYFQNHDAADK	45.61	1453.66	12	-0.7	727.838	47.56	9260000	1	30022	200716_dc_IP79_NormalLung-W6Ab_DDA-OTOT-HCD_25cmPepMap2uTT_145m_01.raw	2	2	Q13151|ROA0_HUMAN				0
SGKKLEDGPKFLK	45.59	1445.82	13	-1.7	482.948	34.2	38000000	1	20393	200716_dc_IP79_NormalLung-W6Ab_DDA-OTOT-HCD_25cmPepMap2uTT_145m_01.raw	2	2	P68104|EF1A1_HUMAN:Q5VTE0|EF1A3_HUMAN				1
KIYKIGQGYLIK	45.57	1422.86	12	-2.1	475.293	50.02	5160000	1	31787	200716_dc_IP79_NormalLung-W6Ab_DDA-OTOT-HCD_25cmPepMap2uTT_145m_01.raw	1	1	P39023|RL3_HUMAN				0
TAPAPTAHKAKK	45.53	1219.7	12	-0.4	407.575	13.54	2230000	1	5736	200716_dc_IP79_NormalLung-W6Ab_DDA-OTOT-HCD_25cmPepMap2uTT_145m_01.raw	2	2	Q92522|H1X_HUMAN				0
DYSKLKKERPDF	45.52	1524.79	12	-1.2	509.271	40.78	13800000	1	25123	200716_dc_IP79_NormalLung-W6Ab_DDA-OTOT-HCD_25cmPepMap2uTT_145m_01.raw	1	1	O00483|NDUA4_HUMAN				0
RTKKLSDYVGK	45.5	1293.74	11	-1	432.254	30.08	7490000	1	17541	200716_dc_IP79_NormalLung-W6Ab_DDA-OTOT-HCD_25cmPepMap2uTT_145m_01.raw	1	1	P57076|CF298_HUMAN				1
RAFLIEEQKIVVK	45.45	1571.94	13	-1.2	524.987	55.05	4630000	1	35298	200716_dc_IP79_NormalLung-W6Ab_DDA-OTOT-HCD_25cmPepMap2uTT_145m_01.raw	1	1	P49207|RL34_HUMAN				0
HLGNVHDQDN	45.43	1147.5	10	-1.7	574.757	26.2	10600000	1	14793	200716_dc_IP79_NormalLung-W6Ab_DDA-OTOT-HCD_25cmPepMap2uTT_145m_01.raw	1	1	Q8WW12|PCNP_HUMAN				1
IPKVQHVIHY	45.41	1232.7	10	-0.9	617.358	42.79	40300000	1	26615	200716_dc_IP79_NormalLung-W6Ab_DDA-OTOT-HCD_25cmPepMap2uTT_145m_01.raw	2	2	Q9GZR7|DDX24_HUMAN				0
TQEKNPLPSKETI	45.26	1483.79	13	-0.9	742.901	42.75	10300000	1	26578	200716_dc_IP79_NormalLung-W6Ab_DDA-OTOT-HCD_25cmPepMap2uTT_145m_01.raw	2	2	P62328|TYB4_HUMAN				0
HQQLYWSHPRK	45.24	1478.75	11	0.2	493.925	30.13	9220000	1	17608	200716_dc_IP79_NormalLung-W6Ab_DDA-OTOT-HCD_25cmPepMap2uTT_145m_01.raw	1	1	P62273|RS29_HUMAN				1
HPKFQKPKQL	45.23	1249.73	10	-0.7	625.872	29.54	242000000	1	17166	200716_dc_IP79_NormalLung-W6Ab_DDA-OTOT-HCD_25cmPepMap2uTT_145m_01.raw	2	2	P35579|MYH9_HUMAN:P35749|MYH11_HUMAN				0
VPNVGKSSLINSL	45.19	1326.75	13	-0.6	664.382	68.98	14300000	1	45133	200716_dc_IP79_NormalLung-W6Ab_DDA-OTOT-HCD_25cmPepMap2uTT_145m_01.raw	1	1	Q9BT17|MTG1_HUMAN				1
TLLHYDPVVKQR	45.1	1467.82	12	-0.1	490.281	46.18	718000	1	29067	200716_dc_IP79_NormalLung-W6Ab_DDA-OTOT-HCD_25cmPepMap2uTT_145m_01.raw	1	1	O75394|RM33_HUMAN				0
SFRYNGLIHR	45.09	1261.67	10	-0.8	421.563	44.91	16500000	1	28105	200716_dc_IP79_NormalLung-W6Ab_DDA-OTOT-HCD_25cmPepMap2uTT_145m_01.raw	1	1	P46779|RL28_HUMAN				1
SGVSLAALKKALA	45.08	1227.76	13	-1.6	614.884	68.64	21900000	1	44888	200716_dc_IP79_NormalLung-W6Ab_DDA-OTOT-HCD_25cmPepMap2uTT_145m_01.raw	2	2	P16403|H12_HUMAN:P10412|H14_HUMAN:P16402|H13_HUMAN				0
HPKTHVTHHL	45.07	1205.64	10	0.2	402.888	24.67	193000000	1	13631	200716_dc_IP79_NormalLung-W6Ab_DDA-OTOT-HCD_25cmPepMap2uTT_145m_01.raw	1	1	Q29960|1C16_HUMAN				0
LPFHLQQHVL	45.06	1230.69	10	-0.7	616.351	65.34	32800000	1	42579	200716_dc_IP79_NormalLung-W6Ab_DDA-OTOT-HCD_25cmPepMap2uTT_145m_01.raw	2	2	O15119|TBX3_HUMAN				0
HFDLSHGSAQ	45.05	1097.49	10	-1.7	549.751	37.8	16100000	1	22989	200716_dc_IP79_NormalLung-W6Ab_DDA-OTOT-HCD_25cmPepMap2uTT_145m_01.raw	1	1	P69905|HBA_HUMAN				0
TGASGSFKLN(+.98)K	45.04	1109.57	11	-1.6	555.792	35.63	73700000	1	21451	200716_dc_IP79_NormalLung-W6Ab_DDA-OTOT-HCD_25cmPepMap2uTT_145m_01.raw	4	4	P16403|H12_HUMAN:P10412|H14_HUMAN:P16402|H13_HUMAN:P16401|H15_HUMAN:Q02539|H11_HUMAN	Deamidation (NQ)	N10:Deamidation (NQ):1000.00		0
SFPKDDPSKPVH	44.99	1352.67	12	-0.6	451.898	32.47	46100000	1	19462	200716_dc_IP79_NormalLung-W6Ab_DDA-OTOT-HCD_25cmPepMap2uTT_145m_01.raw	1	1	P39023|RL3_HUMAN				0
SGPPVSELITKA	44.98	1197.66	12	0.5	599.838	64.23	106000000	1	41903	200716_dc_IP79_NormalLung-W6Ab_DDA-OTOT-HCD_25cmPepMap2uTT_145m_01.raw	1	1	P16403|H12_HUMAN:P10412|H14_HUMAN:P16402|H13_HUMAN				0
HFDLSHGSAQV	44.98	1196.56	11	-0.1	599.286	47.46	167000000	1	30170	200716_dc_IP79_NormalLung-W6Ab_DDA-OTOT-HCD_25cmPepMap2uTT_145m_01.raw	2	2	P69905|HBA_HUMAN				1
ASKTQYFHV	44.88	1079.54	9	-1	540.777	42.16	47500000	1	26114	200716_dc_IP79_NormalLung-W6Ab_DDA-OTOT-HCD_25cmPepMap2uTT_145m_01.raw	2	2	P41218|MNDA_HUMAN				0
SAKPAPPKPEPKP	44.86	1342.76	13	-0.2	448.594	27.96	7930000	1	16055	200716_dc_IP79_NormalLung-W6Ab_DDA-OTOT-HCD_25cmPepMap2uTT_145m_01.raw	1	1	P05204|HMGN2_HUMAN:Q15651|HMGN3_HUMAN				0
HLKDAQIFIQK	44.83	1339.76	11	-1.2	670.887	43.58	150000000	1	27103	200716_dc_IP79_NormalLung-W6Ab_DDA-OTOT-HCD_25cmPepMap2uTT_145m_01.raw	2	2	P04040|CATA_HUMAN				1
QPFSAKDLSIRSL	44.8	1460.8	13	0	487.94	69.58	15600000	1	45547	200716_dc_IP79_NormalLung-W6Ab_DDA-OTOT-HCD_25cmPepMap2uTT_145m_01.raw	2	2	P42226|STAT6_HUMAN				0
VSSSTNPFRPQK	44.77	1346.69	12	-1.6	674.353	36.71	34000000	1	22180	200716_dc_IP79_NormalLung-W6Ab_DDA-OTOT-HCD_25cmPepMap2uTT_145m_01.raw	2	2	P63218|GBG5_HUMAN				1
TVRFNVLKVTK	44.74	1303.8	11	-1.4	435.606	46.68	56600000	1	29650	200716_dc_IP79_NormalLung-W6Ab_DDA-OTOT-HCD_25cmPepMap2uTT_145m_01.raw	2	2	P62280|RS11_HUMAN				1
HIGQVIM(+15.99)SIRTK	44.7	1397.78	12	-0.5	466.934	43.14	150000000	1	26690	200716_dc_IP79_NormalLung-W6Ab_DDA-OTOT-HCD_25cmPepMap2uTT_145m_01.raw	2	2	P27635|RL10_HUMAN:Q96L21|RL10L_HUMAN	Oxidation (M)	M7:Oxidation (M):1000.00		0
MPKVKMPKF	44.7	1104.62	9	-0.7	553.316	51.11	88300000	1	32793	200716_dc_IP79_NormalLung-W6Ab_DDA-OTOT-HCD_25cmPepMap2uTT_145m_01.raw	2	2	Q09666|AHNK_HUMAN				1
GGPGTASRPSSS	44.65	1059.49	12	-1.7	1060.5	26.73	417000000	1	15154	200716_dc_IP79_NormalLung-W6Ab_DDA-OTOT-HCD_25cmPepMap2uTT_145m_01.raw	2	2	P08670|VIME_HUMAN				1
HLVYESDQNK	44.65	1231.58	10	-0.5	616.799	30.47	2720000	1	17835	200716_dc_IP79_NormalLung-W6Ab_DDA-OTOT-HCD_25cmPepMap2uTT_145m_01.raw	1	1	O43852|CALU_HUMAN				0
TQHAVGIVVNK	44.6	1164.66	11	0.3	389.228	34.75	13200000	1	20824	200716_dc_IP79_NormalLung-W6Ab_DDA-OTOT-HCD_25cmPepMap2uTT_145m_01.raw	2	2	P46778|RL21_HUMAN				0
SNSM(+15.99)QTIQKTTT	44.45	1354.64	12	-1	678.327	29.24	2510000	1	16981	200716_dc_IP79_NormalLung-W6Ab_DDA-OTOT-HCD_25cmPepMap2uTT_145m_01.raw	1	1	P05783|K1C18_HUMAN	Oxidation (M)	M4:Oxidation (M):1000.00		0
KAASGEAKPKVK	44.42	1212.72	12	-1.1	405.247	14.31	3940000	1	6248	200716_dc_IP79_NormalLung-W6Ab_DDA-OTOT-HCD_25cmPepMap2uTT_145m_01.raw	2	2	P16403|H12_HUMAN				0
SSTNPFRPQK	44.41	1160.59	10	-1	581.304	31.94	46600000	1	18803	200716_dc_IP79_NormalLung-W6Ab_DDA-OTOT-HCD_25cmPepMap2uTT_145m_01.raw	2	2	P63218|GBG5_HUMAN				1
TAVYKVPPFTFH	44.4	1405.74	12	-1.8	469.586	68.84	6550000	1	45040	200716_dc_IP79_NormalLung-W6Ab_DDA-OTOT-HCD_25cmPepMap2uTT_145m_01.raw	1	1	Q6NZI2|CAVN1_HUMAN				0
HIGQVIMSIRTK	44.4	1381.79	12	-0.4	461.603	49.29	43000000	1	31422	200716_dc_IP79_NormalLung-W6Ab_DDA-OTOT-HCD_25cmPepMap2uTT_145m_01.raw	1	1	P27635|RL10_HUMAN:Q96L21|RL10L_HUMAN				1
SKGQESFKKQEK	44.39	1422.75	12	-0.6	712.38	15.77	29900000	1	7316	200716_dc_IP79_NormalLung-W6Ab_DDA-OTOT-HCD_25cmPepMap2uTT_145m_01.raw	3	3	P06748|NPM_HUMAN				0
SHALVAGIDRYPR	44.37	1453.78	13	-0.9	485.6	44.62	8970000	1	27877	200716_dc_IP79_NormalLung-W6Ab_DDA-OTOT-HCD_25cmPepMap2uTT_145m_01.raw	1	1	P61353|RL27_HUMAN				0
IPNASQAESKVF	44.35	1289.66	12	-0.6	645.838	58.11	3040000	1	37455	200716_dc_IP79_NormalLung-W6Ab_DDA-OTOT-HCD_25cmPepMap2uTT_145m_01.raw	1	1	P63104|1433Z_HUMAN				0
TNVKAAWGKVG	44.35	1129.62	11	-0.9	565.819	40.57	2180000	1	25007	200716_dc_IP79_NormalLung-W6Ab_DDA-OTOT-HCD_25cmPepMap2uTT_145m_01.raw	1	1	P69905|HBA_HUMAN				0
HFELGGDKKR	44.35	1185.63	10	-1.2	396.215	26.54	59100000	1	14982	200716_dc_IP79_NormalLung-W6Ab_DDA-OTOT-HCD_25cmPepMap2uTT_145m_01.raw	2	2	Q969Q0|RL36L_HUMAN:P83881|RL36A_HUMAN				1
FGGPGTASRPSS	44.34	1119.53	12	-0.3	560.773	35.33	17200000	1	21267	200716_dc_IP79_NormalLung-W6Ab_DDA-OTOT-HCD_25cmPepMap2uTT_145m_01.raw	1	1	P08670|VIME_HUMAN				1
YYYDKNIIHK	44.34	1355.69	10	-1.9	452.902	42.21	9730000	1	26182	200716_dc_IP79_NormalLung-W6Ab_DDA-OTOT-HCD_25cmPepMap2uTT_145m_01.raw	2	2	P15036|ETS2_HUMAN:P14921|ETS1_HUMAN				1
HEENLKTKKQQR	44.34	1537.83	12	-0.5	513.618	13.4	2240000	1	5671	200716_dc_IP79_NormalLung-W6Ab_DDA-OTOT-HCD_25cmPepMap2uTT_145m_01.raw	1	1	P42766|RL35_HUMAN				0
SGKKLEDGPKFL	44.33	1317.73	12	-1.4	440.25	43.11	0	1	26842	200716_dc_IP79_NormalLung-W6Ab_DDA-OTOT-HCD_25cmPepMap2uTT_145m_01.raw	0	0	P68104|EF1A1_HUMAN:Q5VTE0|EF1A3_HUMAN				1
VLATVTKPVGGDK	44.32	1283.74	13	-0.7	642.879	37.6	7440000	1	22949	200716_dc_IP79_NormalLung-W6Ab_DDA-OTOT-HCD_25cmPepMap2uTT_145m_01.raw	2	2	Q02878|RL6_HUMAN				0
HFVAASLSNQK	44.32	1200.63	11	-0.9	601.319	37.01	2610000	1	22525	200716_dc_IP79_NormalLung-W6Ab_DDA-OTOT-HCD_25cmPepMap2uTT_145m_01.raw	1	1	Q86XP3|DDX42_HUMAN				0
KPNITNSARHL	44.31	1249.69	11	-0.6	417.57	29.78	48100000	1	17296	200716_dc_IP79_NormalLung-W6Ab_DDA-OTOT-HCD_25cmPepMap2uTT_145m_01.raw	2	2	O00141|SGK1_HUMAN				0
SM(+15.99)KM(+15.99)VAAAKYAR	44.3	1357.68	12	-0.7	453.568	26.49	2080000	1	15029	200716_dc_IP79_NormalLung-W6Ab_DDA-OTOT-HCD_25cmPepMap2uTT_145m_01.raw	1	1	P36542|ATPG_HUMAN	Oxidation (M)	M2:Oxidation (M):1000.00;M4:Oxidation (M):1000.00		0
TGASGSFKLNKK	44.27	1236.68	12	-1.2	413.234	27.52	43400000	1	15701	200716_dc_IP79_NormalLung-W6Ab_DDA-OTOT-HCD_25cmPepMap2uTT_145m_01.raw	2	2	P16403|H12_HUMAN:P10412|H14_HUMAN:P16402|H13_HUMAN:P16401|H15_HUMAN:Q02539|H11_HUMAN				0
VPKTTGEGTSL	44.24	1088.57	11	-0.4	545.293	38.56	40900000	1	23579	200716_dc_IP79_NormalLung-W6Ab_DDA-OTOT-HCD_25cmPepMap2uTT_145m_01.raw	1	1	Q14566|MCM6_HUMAN				1
TDTTKFTGSHKER	44.22	1506.74	13	-1.3	503.254	25.81	6960000	1	14519	200716_dc_IP79_NormalLung-W6Ab_DDA-OTOT-HCD_25cmPepMap2uTT_145m_01.raw	1	1	O94811|TPPP_HUMAN				0
HEGDEGPGHHHKP	44.2	1432.62	13	-0.9	478.548	15.81	7510000	1	7577	200716_dc_IP79_NormalLung-W6Ab_DDA-OTOT-HCD_25cmPepMap2uTT_145m_01.raw	2	2	P06702|S10A9_HUMAN				0
AARFGISSVPTK	44.2	1232.69	12	-1.3	411.903	46.13	8240000	1	29042	200716_dc_IP79_NormalLung-W6Ab_DDA-OTOT-HCD_25cmPepMap2uTT_145m_01.raw	1	1	P82979|SARNP_HUMAN				0
HIYDTKLGTDK	44.16	1289.66	11	-1.4	430.894	36.76	88200000	1	22234	200716_dc_IP79_NormalLung-W6Ab_DDA-OTOT-HCD_25cmPepMap2uTT_145m_01.raw	2	2	Q99439|CNN2_HUMAN				1
VSKGTLVQTK	44.15	1059.63	10	-1.3	530.821	27.82	163000000	1	15943	200716_dc_IP79_NormalLung-W6Ab_DDA-OTOT-HCD_25cmPepMap2uTT_145m_01.raw	3	3	P16403|H12_HUMAN:P10412|H14_HUMAN:P16402|H13_HUMAN:P16401|H15_HUMAN:Q02539|H11_HUMAN				1
GSRPIDTSRLTK	44.14	1329.74	12	-0.7	444.252	33.61	20900000	1	19981	200716_dc_IP79_NormalLung-W6Ab_DDA-OTOT-HCD_25cmPepMap2uTT_145m_01.raw	1	1	Q04637|IF4G1_HUMAN				0
SSYSKQFTSST	44.09	1221.55	11	-1.8	611.782	39.8	1490000	1	24514	200716_dc_IP79_NormalLung-W6Ab_DDA-OTOT-HCD_25cmPepMap2uTT_145m_01.raw	1	1	P02671|FIBA_HUMAN				1
HSKVKVIYK	44.08	1100.67	9	-1.6	367.897	25.61	48900000	1	14325	200716_dc_IP79_NormalLung-W6Ab_DDA-OTOT-HCD_25cmPepMap2uTT_145m_01.raw	1	1	P26358|DNMT1_HUMAN				1
TKKPKATPVKKA	44.06	1295.83	12	-0.9	432.95	14.03	9110000	1	6073	200716_dc_IP79_NormalLung-W6Ab_DDA-OTOT-HCD_25cmPepMap2uTT_145m_01.raw	2	2	P07305|H10_HUMAN				0
AVQEFGLARFK	44.06	1264.69	11	-0.2	633.354	58.31	44700000	1	37576	200716_dc_IP79_NormalLung-W6Ab_DDA-OTOT-HCD_25cmPepMap2uTT_145m_01.raw	2	2	Q9Y255|PRLD1_HUMAN				1
KVKKPATAAGTK	44.03	1198.74	12	0.5	400.587	14.74	41500000	1	6619	200716_dc_IP79_NormalLung-W6Ab_DDA-OTOT-HCD_25cmPepMap2uTT_145m_01.raw	2	2	P16402|H13_HUMAN				1
KLPKQPVIVKAKF	44.02	1494.96	13	-0.9	499.329	42.84	2920000	1	26635	200716_dc_IP79_NormalLung-W6Ab_DDA-OTOT-HCD_25cmPepMap2uTT_145m_01.raw	1	1	P46776|RL27A_HUMAN				1
RQFDNFKRVFK	44	1483.8	11	-1	495.608	44.42	20400000	1	27760	200716_dc_IP79_NormalLung-W6Ab_DDA-OTOT-HCD_25cmPepMap2uTT_145m_01.raw	2	2	O43427|FIBP_HUMAN				1
TVINQTQKENLR	43.98	1442.78	12	-1.1	722.399	34.55	217000000	1	20709	200716_dc_IP79_NormalLung-W6Ab_DDA-OTOT-HCD_25cmPepMap2uTT_145m_01.raw	2	2	P42766|RL35_HUMAN				1
GTGASGSFKLN	43.97	1037.51	11	-0.7	519.764	44.71	167000000	1	27886	200716_dc_IP79_NormalLung-W6Ab_DDA-OTOT-HCD_25cmPepMap2uTT_145m_01.raw	2	2	P16403|H12_HUMAN:P10412|H14_HUMAN:P16402|H13_HUMAN:P16401|H15_HUMAN:Q02539|H11_HUMAN				1
YELGRPAANTK	43.96	1218.64	11	0	610.325	35.19	30100000	1	21188	200716_dc_IP79_NormalLung-W6Ab_DDA-OTOT-HCD_25cmPepMap2uTT_145m_01.raw	2	2	P62241|RS8_HUMAN				0
STHQAAIVSK	43.96	1040.56	10	-0.8	521.288	26.12	1160000	1	14733	200716_dc_IP79_NormalLung-W6Ab_DDA-OTOT-HCD_25cmPepMap2uTT_145m_01.raw	1	1	Q05682|CALD1_HUMAN				0
SYTTPKKNKHK	43.93	1330.74	11	-0.5	444.586	12.01	2450000	1	4653	200716_dc_IP79_NormalLung-W6Ab_DDA-OTOT-HCD_25cmPepMap2uTT_145m_01.raw	2	2	P62979|RS27A_HUMAN				0
KYFDSGDYNM(+15.99)AK	43.91	1453.62	12	-1	727.816	42.55	2720000	1	26447	200716_dc_IP79_NormalLung-W6Ab_DDA-OTOT-HCD_25cmPepMap2uTT_145m_01.raw	2	2	O43768|ENSA_HUMAN:P56211|ARP19_HUMAN	Oxidation (M)	M10:Oxidation (M):1000.00		0
SMKM(+15.99)VAAAKYAR	43.89	1341.69	12	-1.1	448.237	30.03	5310000	1	17376	200716_dc_IP79_NormalLung-W6Ab_DDA-OTOT-HCD_25cmPepMap2uTT_145m_01.raw	1	1	P36542|ATPG_HUMAN	Oxidation (M)	M4:Oxidation (M):27.83		0
GYDVEKNNSRIK	43.89	1421.73	12	0.3	474.916	29.83	7480000	1	17396	200716_dc_IP79_NormalLung-W6Ab_DDA-OTOT-HCD_25cmPepMap2uTT_145m_01.raw	1	1	P16403|H12_HUMAN:P10412|H14_HUMAN:P16402|H13_HUMAN:P16401|H15_HUMAN:Q02539|H11_HUMAN:P22492|H1T_HUMAN				0
TGPPVSELITK	43.89	1140.64	11	-0.5	571.327	58.57	431000000	1	37755	200716_dc_IP79_NormalLung-W6Ab_DDA-OTOT-HCD_25cmPepMap2uTT_145m_01.raw	2	2	P16401|H15_HUMAN				0
VPRPVLRALSF	43.87	1253.76	11	-2	418.927	68.54	15300000	1	44808	200716_dc_IP79_NormalLung-W6Ab_DDA-OTOT-HCD_25cmPepMap2uTT_145m_01.raw	2	2	Q9GZR7|DDX24_HUMAN				1
SSSYSKQFTSST	43.85	1308.58	12	-0.9	655.298	40.44	2900000	1	24950	200716_dc_IP79_NormalLung-W6Ab_DDA-OTOT-HCD_25cmPepMap2uTT_145m_01.raw	1	1	P02671|FIBA_HUMAN				1
SAPATGGVKKPH	43.81	1148.63	12	-0.4	383.884	25.32	19000000	1	14126	200716_dc_IP79_NormalLung-W6Ab_DDA-OTOT-HCD_25cmPepMap2uTT_145m_01.raw	1	1	Q71DI3|H32_HUMAN:P68431|H31_HUMAN:Q16695|H31T_HUMAN				0
SVTEHPSPSPL	43.79	1149.57	11	-0.9	575.79	45.7	6570000	1	28641	200716_dc_IP79_NormalLung-W6Ab_DDA-OTOT-HCD_25cmPepMap2uTT_145m_01.raw	1	1	P07910|HNRPC_HUMAN				1
APKSPAKAKAV	43.75	1066.65	11	-0.6	356.557	25.02	39100000	1	13861	200716_dc_IP79_NormalLung-W6Ab_DDA-OTOT-HCD_25cmPepMap2uTT_145m_01.raw	1	1	P10412|H14_HUMAN				0
RPKQEKAFSL	43.72	1202.68	10	-1	401.899	33.51	32400000	1	19941	200716_dc_IP79_NormalLung-W6Ab_DDA-OTOT-HCD_25cmPepMap2uTT_145m_01.raw	2	2	Q86UE4|LYRIC_HUMAN				1
SLTSN(+.98)HQKISSGK	43.67	1386.71	13	-1	463.244	27.18	20200000	1	15486	200716_dc_IP79_NormalLung-W6Ab_DDA-OTOT-HCD_25cmPepMap2uTT_145m_01.raw	1	1	O95810|CAVN2_HUMAN	Deamidation (NQ)	N5:Deamidation (NQ):32.28		0
SPAKPKAVKPK	43.66	1149.72	11	0.4	384.248	18.75	2600000	1	9348	200716_dc_IP79_NormalLung-W6Ab_DDA-OTOT-HCD_25cmPepMap2uTT_145m_01.raw	1	1	P16401|H15_HUMAN				0
STDHPKYSDM	43.66	1179.49	10	0	590.75	32.28	8340000	1	19076	200716_dc_IP79_NormalLung-W6Ab_DDA-OTOT-HCD_25cmPepMap2uTT_145m_01.raw	2	2	P07305|H10_HUMAN				0
AGYDVEKNNS	43.61	1095.48	10	-0.2	548.749	32.23	17500000	1	19072	200716_dc_IP79_NormalLung-W6Ab_DDA-OTOT-HCD_25cmPepMap2uTT_145m_01.raw	1	1	P16403|H12_HUMAN:P10412|H14_HUMAN:P16402|H13_HUMAN:Q02539|H11_HUMAN:P22492|H1T_HUMAN				0
GDKAKVKDEPQR	43.59	1369.73	12	-0.7	457.584	20.99	4720000	1	11065	200716_dc_IP79_NormalLung-W6Ab_DDA-OTOT-HCD_25cmPepMap2uTT_145m_01.raw	1	1	P05204|HMGN2_HUMAN:O00479|HMGN4_HUMAN				0
SHTKPYVRSK	43.51	1201.66	10	-1.8	401.559	16.64	1650000	1	7955	200716_dc_IP79_NormalLung-W6Ab_DDA-OTOT-HCD_25cmPepMap2uTT_145m_01.raw	2	2	Q07020|RL18_HUMAN				0
TPSGTNVGSSGR	43.47	1118.53	12	-0.3	560.273	28.16	13100000	1	16191	200716_dc_IP79_NormalLung-W6Ab_DDA-OTOT-HCD_25cmPepMap2uTT_145m_01.raw	1	1	P60468|SC61B_HUMAN				0
SEGLKLVDKFLED	43.46	1491.78	13	-1.2	746.897	79.93	1730000	1	52763	200716_dc_IP79_NormalLung-W6Ab_DDA-OTOT-HCD_25cmPepMap2uTT_145m_01.raw	2	2	P01009|A1AT_HUMAN				0
HEVGWKYQA	43.45	1116.54	9	-1.7	559.274	40.88	78600000	1	25159	200716_dc_IP79_NormalLung-W6Ab_DDA-OTOT-HCD_25cmPepMap2uTT_145m_01.raw	2	2	P40429|RL13A_HUMAN				1
HNDNSWIRQR	43.45	1324.64	10	-1.1	442.553	31.65	6310000	1	18682	200716_dc_IP79_NormalLung-W6Ab_DDA-OTOT-HCD_25cmPepMap2uTT_145m_01.raw	1	1	Q8WWI1|LMO7_HUMAN				0
KPANAVLHKVL	43.44	1188.73	11	0	397.252	38.09	2920000	1	23284	200716_dc_IP79_NormalLung-W6Ab_DDA-OTOT-HCD_25cmPepMap2uTT_145m_01.raw	1	1	Q14839|CHD4_HUMAN:Q12873|CHD3_HUMAN:Q8TDI0|CHD5_HUMAN				0
SLGSALRPSTS	43.44	1074.57	11	-1.5	1075.57	45.75	297000000	1	28658	200716_dc_IP79_NormalLung-W6Ab_DDA-OTOT-HCD_25cmPepMap2uTT_145m_01.raw	2	2	P08670|VIME_HUMAN				1
GGPGTASRPSS	43.41	972.462	11	-0.5	973.469	26.65	138000000	1	15087	200716_dc_IP79_NormalLung-W6Ab_DDA-OTOT-HCD_25cmPepMap2uTT_145m_01.raw	1	1	P08670|VIME_HUMAN				1
KTIDMELVKRK	43.4	1359.79	11	-0.5	454.271	35.29	6930000	1	21273	200716_dc_IP79_NormalLung-W6Ab_DDA-OTOT-HCD_25cmPepMap2uTT_145m_01.raw	1	1	P01137|TGFB1_HUMAN				1
KLTSDDVKEQIYK	43.39	1565.83	13	-1.1	522.95	43.28	1900000	1	26982	200716_dc_IP79_NormalLung-W6Ab_DDA-OTOT-HCD_25cmPepMap2uTT_145m_01.raw	1	1	P62277|RS13_HUMAN				0
VPNANSIKQM(+15.99)L	43.38	1229.64	11	0.3	615.829	54.95	2040000	1	35266	200716_dc_IP79_NormalLung-W6Ab_DDA-OTOT-HCD_25cmPepMap2uTT_145m_01.raw	1	1	P53814|SMTN_HUMAN	Oxidation (M)	M10:Oxidation (M):1000.00		0
HWGGNVLGPK	43.38	1063.56	10	-1.2	532.785	43.38	29100000	1	27038	200716_dc_IP79_NormalLung-W6Ab_DDA-OTOT-HCD_25cmPepMap2uTT_145m_01.raw	1	1	P62424|RL7A_HUMAN				0
HFNAPSHIR	43.37	1077.55	9	-1.6	360.189	29.98	15200000	1	17467	200716_dc_IP79_NormalLung-W6Ab_DDA-OTOT-HCD_25cmPepMap2uTT_145m_01.raw	1	1	P61254|RL26_HUMAN				1
VPKTAENFRAL	43.37	1244.69	11	-0.3	415.903	46.63	159000000	1	29256	200716_dc_IP79_NormalLung-W6Ab_DDA-OTOT-HCD_25cmPepMap2uTT_145m_01.raw	2	2	Q08752|PPID_HUMAN:P30405|PPIF_HUMAN:P62937|PPIA_HUMAN				1
HPFHVIRINK	43.34	1259.73	10	-0.6	420.915	36.21	7040000	1	21890	200716_dc_IP79_NormalLung-W6Ab_DDA-OTOT-HCD_25cmPepMap2uTT_145m_01.raw	1	1	P27635|RL10_HUMAN:Q96L21|RL10L_HUMAN				0
HRPGPATSSSGR	43.33	1208.6	12	-1.6	403.874	23.67	2370000	1	12704	200716_dc_IP79_NormalLung-W6Ab_DDA-OTOT-HCD_25cmPepMap2uTT_145m_01.raw	1	1	O60504|VINEX_HUMAN				0
VPKMKVPKF	43.3	1072.65	9	-1.5	537.33	46.33	137000000	1	29222	200716_dc_IP79_NormalLung-W6Ab_DDA-OTOT-HCD_25cmPepMap2uTT_145m_01.raw	2	2	Q09666|AHNK_HUMAN				0
TSTSLGKGSFLDK	43.3	1339.7	13	-0.4	670.856	46.14	7580000	1	29028	200716_dc_IP79_NormalLung-W6Ab_DDA-OTOT-HCD_25cmPepMap2uTT_145m_01.raw	2	2	Q9BW04|SARG_HUMAN				0
TAVYKVPPFT	43.3	1121.61	10	-1.7	561.812	67.55	69800000	1	44430	200716_dc_IP79_NormalLung-W6Ab_DDA-OTOT-HCD_25cmPepMap2uTT_145m_01.raw	1	1	Q6NZI2|CAVN1_HUMAN				0
HGDSDLQLDRI	43.28	1267.62	11	-0.8	634.815	53.28	3500000	1	34078	200716_dc_IP79_NormalLung-W6Ab_DDA-OTOT-HCD_25cmPepMap2uTT_145m_01.raw	1	1	P07437|TBB5_HUMAN				1
SPKRPPSPIKF	43.27	1252.73	11	-0.2	418.584	41.07	6730000	1	25372	200716_dc_IP79_NormalLung-W6Ab_DDA-OTOT-HCD_25cmPepMap2uTT_145m_01.raw	1	1	A0AVT1|UBA6_HUMAN				1
KLKGDDLQAIKK	43.25	1355.81	12	-0.8	452.945	29.49	11100000	1	17143	200716_dc_IP79_NormalLung-W6Ab_DDA-OTOT-HCD_25cmPepMap2uTT_145m_01.raw	1	1	P07910|HNRPC_HUMAN				1
TPKIQVYSRHPAE	43.25	1524.8	13	0	509.276	36.27	1750000	1	21994	200716_dc_IP79_NormalLung-W6Ab_DDA-OTOT-HCD_25cmPepMap2uTT_145m_01.raw	1	1	P61769|B2MG_HUMAN				1
LPKKTESHHKAK	43.23	1402.8	12	-1.6	468.608	11.77	714000	1	4562	200716_dc_IP79_NormalLung-W6Ab_DDA-OTOT-HCD_25cmPepMap2uTT_145m_01.raw	1	1	P20671|H2A1D_HUMAN:P04908|H2A1B_HUMAN:Q93077|H2A1C_HUMAN:Q7L7L0|H2A3_HUMAN:P0C0S8|H2A1_HUMAN:Q6FI13|H2A2A_HUMAN:Q96KK5|H2A1H_HUMAN				0
SPVINVPLKVF	43.2	1211.73	11	-0.9	606.871	87.25	1040000	1	57963	200716_dc_IP79_NormalLung-W6Ab_DDA-OTOT-HCD_25cmPepMap2uTT_145m_01.raw	1	1	Q5BJD5|TM41B_HUMAN				0
LPYKGSEHSL	43.16	1129.58	10	-1.1	565.795	38.13	67400000	1	23280	200716_dc_IP79_NormalLung-W6Ab_DDA-OTOT-HCD_25cmPepMap2uTT_145m_01.raw	2	2	P22748|CAH4_HUMAN				1
APPVLKRPIL	43.16	1102.72	10	-0.6	552.368	51.94	6920000	1	33099	200716_dc_IP79_NormalLung-W6Ab_DDA-OTOT-HCD_25cmPepMap2uTT_145m_01.raw	2	2	Q8N766|EMC1_HUMAN				1
SFTPDHVVYARSK	43.15	1505.76	13	-0.8	502.928	41.17	43900000	1	25400	200716_dc_IP79_NormalLung-W6Ab_DDA-OTOT-HCD_25cmPepMap2uTT_145m_01.raw	2	2	Q6NZI2|CAVN1_HUMAN				0
VPRTAENFRAL	43.13	1272.69	11	-0.9	425.238	47.32	4930000	1	29825	200716_dc_IP79_NormalLung-W6Ab_DDA-OTOT-HCD_25cmPepMap2uTT_145m_01.raw	1	1	P49792|RBP2_HUMAN				1
SPNALRVDIEAL	43.12	1296.7	12	-0.8	649.359	79.24	5770000	1	52235	200716_dc_IP79_NormalLung-W6Ab_DDA-OTOT-HCD_25cmPepMap2uTT_145m_01.raw	1	1	Q9BZZ2|SN_HUMAN				0
HGDSDLQLERI	43.1	1281.63	11	-1.1	641.822	52.19	2250000	1	33301	200716_dc_IP79_NormalLung-W6Ab_DDA-OTOT-HCD_25cmPepMap2uTT_145m_01.raw	1	1	P68371|TBB4B_HUMAN:P04350|TBB4A_HUMAN:Q9BVA1|TBB2B_HUMAN:Q13885|TBB2A_HUMAN				1
SHFVAASLSNQK	43.08	1287.66	12	-0.2	644.836	38.18	1980000	1	23397	200716_dc_IP79_NormalLung-W6Ab_DDA-OTOT-HCD_25cmPepMap2uTT_145m_01.raw	2	2	Q86XP3|DDX42_HUMAN				0
FVSETESRGSESG	43.06	1370.6	13	-1.2	686.304	33.66	4680000	1	20106	200716_dc_IP79_NormalLung-W6Ab_DDA-OTOT-HCD_25cmPepMap2uTT_145m_01.raw	1	1	P02671|FIBA_HUMAN				0
TLQSQKAEGTGDA	43.05	1304.62	13	-1	653.317	29.59	2540000	1	17220	200716_dc_IP79_NormalLung-W6Ab_DDA-OTOT-HCD_25cmPepMap2uTT_145m_01.raw	1	1	O00479|HMGN4_HUMAN				0
TKGTGASGSFKLN	43	1266.66	13	-0.9	634.335	35.77	10200000	1	21602	200716_dc_IP79_NormalLung-W6Ab_DDA-OTOT-HCD_25cmPepMap2uTT_145m_01.raw	2	2	P16403|H12_HUMAN:P10412|H14_HUMAN:P16402|H13_HUMAN:P16401|H15_HUMAN:Q02539|H11_HUMAN				0
EEM(+15.99)NYIKDVRA	43	1382.65	11	-1.1	692.332	45.85	11500000	1	28751	200716_dc_IP79_NormalLung-W6Ab_DDA-OTOT-HCD_25cmPepMap2uTT_145m_01.raw	1	1	P0CAP1|MYZAP_HUMAN	Oxidation (M)	M3:Oxidation (M):1000.00		0
KVFGGTVHKK	42.9	1099.65	10	0.6	367.558	24.15	75500000	1	13432	200716_dc_IP79_NormalLung-W6Ab_DDA-OTOT-HCD_25cmPepMap2uTT_145m_01.raw	2	2	P49915|GUAA_HUMAN				1
SLADLQNDEVAFR	42.89	1476.72	13	0.8	739.368	75.04	0	1	49320	200716_dc_IP79_NormalLung-W6Ab_DDA-OTOT-HCD_25cmPepMap2uTT_145m_01.raw	0	0	P61247|RS3A_HUMAN				0
HLTIKLTPAHSR	42.88	1372.79	12	-1	458.605	33.42	2250000	1	19968	200716_dc_IP79_NormalLung-W6Ab_DDA-OTOT-HCD_25cmPepMap2uTT_145m_01.raw	1	1	O95466|FMNL1_HUMAN				0
ASGPPVSELITKA	42.87	1268.7	13	-1.5	635.355	65.35	13800000	1	42532	200716_dc_IP79_NormalLung-W6Ab_DDA-OTOT-HCD_25cmPepMap2uTT_145m_01.raw	1	1	P16403|H12_HUMAN:P10412|H14_HUMAN:P16402|H13_HUMAN				0
SYPARVPPPPPIA	42.83	1360.75	13	-0.3	1361.76	61.47	657000000	1	39647	200716_dc_IP79_NormalLung-W6Ab_DDA-OTOT-HCD_25cmPepMap2uTT_145m_01.raw	2	2	P07910|HNRPC_HUMAN				1
YPNVNIHNF	42.81	1116.54	9	0	559.275	65.78	129000000	1	42861	200716_dc_IP79_NormalLung-W6Ab_DDA-OTOT-HCD_25cmPepMap2uTT_145m_01.raw	1	1	Q01082|SPTB2_HUMAN				1
HFGKAPGTPH	42.77	1047.53	10	-1	524.769	27.08	19300000	1	15457	200716_dc_IP79_NormalLung-W6Ab_DDA-OTOT-HCD_25cmPepMap2uTT_145m_01.raw	2	2	Q07020|RL18_HUMAN				1
GTGANGSFKLNR	42.77	1220.63	12	-0.9	407.882	35.63	2170000	1	21557	200716_dc_IP79_NormalLung-W6Ab_DDA-OTOT-HCD_25cmPepMap2uTT_145m_01.raw	1	1	Q92522|H1X_HUMAN				0
TDQVM(+15.99)QNPRVLAA	42.76	1457.73	13	0.3	729.872	47.96	2960000	1	30316	200716_dc_IP79_NormalLung-W6Ab_DDA-OTOT-HCD_25cmPepMap2uTT_145m_01.raw	1	1	Q99733|NP1L4_HUMAN	Oxidation (M)	M5:Oxidation (M):1000.00		0
SGGGSFGDNLVTR	42.75	1265.6	13	-0.7	633.807	53.57	4550000	1	34279	200716_dc_IP79_NormalLung-W6Ab_DDA-OTOT-HCD_25cmPepMap2uTT_145m_01.raw	1	1	P02545|LMNA_HUMAN				0
TPPAVFDAKQL	42.75	1185.64	11	-0.7	593.827	65.13	56000000	1	42597	200716_dc_IP79_NormalLung-W6Ab_DDA-OTOT-HCD_25cmPepMap2uTT_145m_01.raw	1	1	P12429|ANXA3_HUMAN				0
TVGM(+15.99)NFKTPRGPV	42.74	1418.73	13	-0.8	473.918	46.68	70200000	1	29428	200716_dc_IP79_NormalLung-W6Ab_DDA-OTOT-HCD_25cmPepMap2uTT_145m_01.raw	2	2	P08708|RS17_HUMAN	Oxidation (M)	M4:Oxidation (M):1000.00		0
HQGVM(+15.99)VGM(+15.99)GQK	42.7	1202.55	11	-1.3	602.283	26.35	1360000	1	14900	200716_dc_IP79_NormalLung-W6Ab_DDA-OTOT-HCD_25cmPepMap2uTT_145m_01.raw	1	1	P60709|ACTB_HUMAN:P63261|ACTG_HUMAN:P68032|ACTC_HUMAN:P62736|ACTA_HUMAN:P68133|ACTS_HUMAN:P63267|ACTH_HUMAN:Q562R1|ACTBL_HUMAN	Oxidation (M)	M5:Oxidation (M):1000.00;M8:Oxidation (M):1000.00		0
RIAPRPASGPIRP	42.67	1386.82	13	-0.9	463.28	35.64	6340000	1	21409	200716_dc_IP79_NormalLung-W6Ab_DDA-OTOT-HCD_25cmPepMap2uTT_145m_01.raw	1	1	P26373|RL13_HUMAN				0
SGVSLAALKKA	42.67	1043.63	11	-0.3	522.824	45.35	167000000	1	28350	200716_dc_IP79_NormalLung-W6Ab_DDA-OTOT-HCD_25cmPepMap2uTT_145m_01.raw	1	1	P16403|H12_HUMAN:P10412|H14_HUMAN:P16402|H13_HUMAN				0
TFDQLALDSPK	42.63	1233.62	11	-1.7	617.818	64.6	1350000	1	42160	200716_dc_IP79_NormalLung-W6Ab_DDA-OTOT-HCD_25cmPepMap2uTT_145m_01.raw	1	1	Q07020|RL18_HUMAN				0
HSFDPFADASK	42.59	1220.55	11	0.3	611.28	54.66	10100000	1	35019	200716_dc_IP79_NormalLung-W6Ab_DDA-OTOT-HCD_25cmPepMap2uTT_145m_01.raw	1	1	P41567|EIF1_HUMAN				1
HSGYSDSAVLK	42.56	1162.56	11	-0.7	582.288	34.7	1120000	1	20852	200716_dc_IP79_NormalLung-W6Ab_DDA-OTOT-HCD_25cmPepMap2uTT_145m_01.raw	1	1	P43243|MATR3_HUMAN				0
TVIGPDGHKEVTK	42.56	1379.74	13	-0.6	460.921	29.49	8670000	1	17164	200716_dc_IP79_NormalLung-W6Ab_DDA-OTOT-HCD_25cmPepMap2uTT_145m_01.raw	1	1	P02671|FIBA_HUMAN				0
LPKDAVKHLHVL	42.55	1368.82	12	-0.7	457.282	45.85	10600000	1	28765	200716_dc_IP79_NormalLung-W6Ab_DDA-OTOT-HCD_25cmPepMap2uTT_145m_01.raw	1	1	Q9NS23|RASF1_HUMAN				0
HGSLGFLPRKR	42.53	1266.73	11	-1.7	423.25	33.42	4610000	1	20003	200716_dc_IP79_NormalLung-W6Ab_DDA-OTOT-HCD_25cmPepMap2uTT_145m_01.raw	1	1	P39023|RL3_HUMAN				0
TEN(+.98)STSAPAAKPK	42.5	1301.65	13	-0.5	434.889	26.4	109000000	1	14799	200716_dc_IP79_NormalLung-W6Ab_DDA-OTOT-HCD_25cmPepMap2uTT_145m_01.raw	2	2	P07305|H10_HUMAN	Deamidation (NQ)	N3:Deamidation (NQ):1000.00		0
LPKYGVKVGL	42.5	1072.66	10	-0.8	537.339	54.61	102000000	1	34899	200716_dc_IP79_NormalLung-W6Ab_DDA-OTOT-HCD_25cmPepMap2uTT_145m_01.raw	2	2	P46777|RL5_HUMAN				0
SARLSAKPAPPKP	42.46	1318.77	13	-2	440.597	30.96	5140000	1	18217	200716_dc_IP79_NormalLung-W6Ab_DDA-OTOT-HCD_25cmPepMap2uTT_145m_01.raw	1	1	P05204|HMGN2_HUMAN:O00479|HMGN4_HUMAN:Q15651|HMGN3_HUMAN				0
KFKQISQAY	42.45	1111.6	9	-0.6	556.808	38.28	62300000	1	23379	200716_dc_IP79_NormalLung-W6Ab_DDA-OTOT-HCD_25cmPepMap2uTT_145m_01.raw	2	2	P31689|DNJA1_HUMAN				1
TVINQTQKENLRK	42.45	1570.88	13	-1.1	524.633	29.44	45600000	1	17091	200716_dc_IP79_NormalLung-W6Ab_DDA-OTOT-HCD_25cmPepMap2uTT_145m_01.raw	1	1	P42766|RL35_HUMAN				1
HDEGYGPPPP	42.45	1064.46	10	0.3	1065.46	43.14	44400000	1	26828	200716_dc_IP79_NormalLung-W6Ab_DDA-OTOT-HCD_25cmPepMap2uTT_145m_01.raw	2	2	P14866|HNRPL_HUMAN				0
PEPAKSAPAPK	42.44	1091.6	11	-1.3	546.805	26.25	160000000	1	14779	200716_dc_IP79_NormalLung-W6Ab_DDA-OTOT-HCD_25cmPepMap2uTT_145m_01.raw	2	2	P62807|H2B1C_HUMAN:O60814|H2B1K_HUMAN:P57053|H2BFS_HUMAN:Q16778|H2B2E_HUMAN:P06899|H2B1J_HUMAN				1
KESYSVYVYKVLK	42.42	1604.88	13	-0.7	535.967	58.8	1830000	1	38064	200716_dc_IP79_NormalLung-W6Ab_DDA-OTOT-HCD_25cmPepMap2uTT_145m_01.raw	1	1	P62807|H2B1C_HUMAN:O60814|H2B1K_HUMAN:P57053|H2BFS_HUMAN:Q93079|H2B1H_HUMAN:Q5QNW6|H2B2F_HUMAN:Q99877|H2B1N_HUMAN:P58876|H2B1D_HUMAN:Q99880|H2B1L_HUMAN:Q99879|H2B1M_HUMAN				1
SSSYSKQFTSSTS	42.41	1395.62	13	-0.5	698.815	39.9	8310000	1	24547	200716_dc_IP79_NormalLung-W6Ab_DDA-OTOT-HCD_25cmPepMap2uTT_145m_01.raw	1	1	P02671|FIBA_HUMAN				1
TNTSAPDLKNVRS	42.39	1401.72	13	-2.3	468.247	37.8	5120000	1	23040	200716_dc_IP79_NormalLung-W6Ab_DDA-OTOT-HCD_25cmPepMap2uTT_145m_01.raw	1	1	P27816|MAP4_HUMAN				0
RPPLKKYSF	42.39	1134.65	9	-0.7	379.225	35.38	14500000	1	21296	200716_dc_IP79_NormalLung-W6Ab_DDA-OTOT-HCD_25cmPepMap2uTT_145m_01.raw	1	1	P21675|TAF1_HUMAN:Q8IZX4|TAF1L_HUMAN				0
KSVAFKKTKK	42.39	1163.74	10	-0.2	582.877	13.01	5910000	1	5426	200716_dc_IP79_NormalLung-W6Ab_DDA-OTOT-HCD_25cmPepMap2uTT_145m_01.raw	2	2	P07305|H10_HUMAN				0
TPSLVKSTSQL	42.39	1159.64	11	0.5	580.83	52.25	38900000	1	33247	200716_dc_IP79_NormalLung-W6Ab_DDA-OTOT-HCD_25cmPepMap2uTT_145m_01.raw	1	1	Q06055|AT5G2_HUMAN				1
SGTNVGSSGRSP	42.38	1104.52	12	-1.3	553.264	27.67	9430000	1	15821	200716_dc_IP79_NormalLung-W6Ab_DDA-OTOT-HCD_25cmPepMap2uTT_145m_01.raw	1	1	P60468|SC61B_HUMAN				0
TPLHNDNSWIRQ	42.36	1479.72	12	-1.3	494.247	48.35	3280000	1	30598	200716_dc_IP79_NormalLung-W6Ab_DDA-OTOT-HCD_25cmPepMap2uTT_145m_01.raw	1	1	Q8WWI1|LMO7_HUMAN				0
SYGARPVSSAAS	42.32	1151.56	12	-1.1	576.785	34.06	7150000	1	20352	200716_dc_IP79_NormalLung-W6Ab_DDA-OTOT-HCD_25cmPepMap2uTT_145m_01.raw	1	1	P05783|K1C18_HUMAN				0
TLREYKVVGR	42.32	1219.7	10	-1.1	407.575	33.66	11300000	1	20072	200716_dc_IP79_NormalLung-W6Ab_DDA-OTOT-HCD_25cmPepMap2uTT_145m_01.raw	1	1	Q02543|RL18A_HUMAN				1
SDNQLQEGKNVIG	42.28	1400.69	13	-0.5	701.352	48.55	2570000	1	30766	200716_dc_IP79_NormalLung-W6Ab_DDA-OTOT-HCD_25cmPepMap2uTT_145m_01.raw	1	1	P37802|TAGL2_HUMAN				1
APNEKMKQVL	42.28	1156.63	10	-1.1	579.32	37.35	8590000	1	22762	200716_dc_IP79_NormalLung-W6Ab_DDA-OTOT-HCD_25cmPepMap2uTT_145m_01.raw	2	2	P57076|CF298_HUMAN				1
TVETRDGQVINET	42.27	1460.71	13	-1.8	731.361	42.16	3550000	1	26146	200716_dc_IP79_NormalLung-W6Ab_DDA-OTOT-HCD_25cmPepMap2uTT_145m_01.raw	1	1	P08670|VIME_HUMAN				0
HYSGLKHEDK	42.27	1212.59	10	-0.8	405.203	18.95	22000000	1	9726	200716_dc_IP79_NormalLung-W6Ab_DDA-OTOT-HCD_25cmPepMap2uTT_145m_01.raw	1	1	Q8NC51|PAIRB_HUMAN				0
HPGYFGKVGM(+15.99)K	42.26	1235.61	11	-1	412.878	31.55	2100000	1	18643	200716_dc_IP79_NormalLung-W6Ab_DDA-OTOT-HCD_25cmPepMap2uTT_145m_01.raw	1	1	P46776|RL27A_HUMAN	Oxidation (M)	M10:Oxidation (M):1000.00		0
NNASTDYDLSDK	42.25	1341.57	12	-1.4	671.791	42.84	3230000	1	26626	200716_dc_IP79_NormalLung-W6Ab_DDA-OTOT-HCD_25cmPepMap2uTT_145m_01.raw	1	1	P39023|RL3_HUMAN				1
HLGTALKANP	42.22	1020.57	10	-0.9	511.293	33.66	14500000	1	19982	200716_dc_IP79_NormalLung-W6Ab_DDA-OTOT-HCD_25cmPepMap2uTT_145m_01.raw	1	1	P62266|RS23_HUMAN				0
TSPAKQQAPPVRN	42.2	1392.75	13	-0.8	465.256	27.57	8140000	1	15753	200716_dc_IP79_NormalLung-W6Ab_DDA-OTOT-HCD_25cmPepMap2uTT_145m_01.raw	1	1	Q16555|DPYL2_HUMAN				1
RYTDVSTRYK	42.2	1287.66	10	-0.9	430.226	31.11	13700000	1	18308	200716_dc_IP79_NormalLung-W6Ab_DDA-OTOT-HCD_25cmPepMap2uTT_145m_01.raw	1	1	Q9Y320|TMX2_HUMAN				1
TPDAMKAAMAL	42.18	1118.55	11	-0.5	560.28	69.68	2730000	1	45693	200716_dc_IP79_NormalLung-W6Ab_DDA-OTOT-HCD_25cmPepMap2uTT_145m_01.raw	1	1	P02792|FRIL_HUMAN				1
APYSTHFQLQ	42.18	1190.57	10	-1.4	596.293	58.56	4990000	1	37796	200716_dc_IP79_NormalLung-W6Ab_DDA-OTOT-HCD_25cmPepMap2uTT_145m_01.raw	1	1	Q8NFJ5|RAI3_HUMAN				0
RQFPGSHRVK	42.17	1210.67	10	-1.4	404.563	25.51	5010000	1	14276	200716_dc_IP79_NormalLung-W6Ab_DDA-OTOT-HCD_25cmPepMap2uTT_145m_01.raw	1	1	Q15006|EMC2_HUMAN				1
AKKPAGAAKKPK	42.14	1193.76	12	-0.5	398.927	11.28	7520000	1	4166	200716_dc_IP79_NormalLung-W6Ab_DDA-OTOT-HCD_25cmPepMap2uTT_145m_01.raw	2	2	P10412|H14_HUMAN				0
SAYGGPVGAGIRE	42.14	1232.61	13	-1	617.314	50.66	3570000	1	32215	200716_dc_IP79_NormalLung-W6Ab_DDA-OTOT-HCD_25cmPepMap2uTT_145m_01.raw	1	1	P08729|K2C7_HUMAN				0
VPLPISHKRVL	42.12	1257.79	11	-0.6	420.271	44.86	3970000	1	28106	200716_dc_IP79_NormalLung-W6Ab_DDA-OTOT-HCD_25cmPepMap2uTT_145m_01.raw	1	1	P51784|UBP11_HUMAN				0
GGPGTASRPS	42.09	885.43	10	-1.9	886.436	26.35	167000000	1	14873	200716_dc_IP79_NormalLung-W6Ab_DDA-OTOT-HCD_25cmPepMap2uTT_145m_01.raw	2	2	P08670|VIME_HUMAN				1
TSYAQHQQVR	42.07	1216.59	10	-1.5	406.538	26.78	8130000	1	15207	200716_dc_IP79_NormalLung-W6Ab_DDA-OTOT-HCD_25cmPepMap2uTT_145m_01.raw	1	1	P61247|RS3A_HUMAN				0
APNPAKATVTA	42.06	1039.57	11	-1	520.79	35.58	3530000	1	21413	200716_dc_IP79_NormalLung-W6Ab_DDA-OTOT-HCD_25cmPepMap2uTT_145m_01.raw	1	1	O95793|STAU1_HUMAN				1
TLVTRTQGTK	42.05	1103.63	10	-1.2	552.822	26.88	106000000	1	15266	200716_dc_IP79_NormalLung-W6Ab_DDA-OTOT-HCD_25cmPepMap2uTT_145m_01.raw	2	2	P61247|RS3A_HUMAN				1
SAPGGGSKVPQK	42.05	1111.6	12	-1.1	556.806	25.76	31400000	1	14450	200716_dc_IP79_NormalLung-W6Ab_DDA-OTOT-HCD_25cmPepMap2uTT_145m_01.raw	2	2	P06748|NPM_HUMAN				1
VPNPRIKLIDF	41.98	1310.77	11	-0.5	656.393	70.62	9420000	1	46302	200716_dc_IP79_NormalLung-W6Ab_DDA-OTOT-HCD_25cmPepMap2uTT_145m_01.raw	1	1	O43293|DAPK3_HUMAN				0
KAASGEAKPKAK	41.98	1184.69	12	0.6	395.903	10.84	904000	1	3863	200716_dc_IP79_NormalLung-W6Ab_DDA-OTOT-HCD_25cmPepMap2uTT_145m_01.raw	1	1	P10412|H14_HUMAN:P16401|H15_HUMAN				0
SDVELDDLGKDEL	41.93	1446.67	13	0.2	724.344	77.07	12700000	1	50689	200716_dc_IP79_NormalLung-W6Ab_DDA-OTOT-HCD_25cmPepMap2uTT_145m_01.raw	1	1	Q15084|PDIA6_HUMAN				1
TVGPKAPSGGK	41.9	997.556	11	-0.9	499.785	26.45	5130000	1	14955	200716_dc_IP79_NormalLung-W6Ab_DDA-OTOT-HCD_25cmPepMap2uTT_145m_01.raw	1	1	P16104|H2AX_HUMAN				0
FVNVVPTFGK	41.9	1106.61	10	-1.3	554.313	71.89	9290000	1	47051	200716_dc_IP79_NormalLung-W6Ab_DDA-OTOT-HCD_25cmPepMap2uTT_145m_01.raw	1	1	P62861|RS30_HUMAN				1
TWMVGTKLPNS	41.84	1232.62	11	-1.1	617.318	66.96	27200000	1	43704	200716_dc_IP79_NormalLung-W6Ab_DDA-OTOT-HCD_25cmPepMap2uTT_145m_01.raw	1	1	Q9NZN4|EHD2_HUMAN				0
TTSYLIGRQK	41.83	1165.65	10	-2	583.829	36.22	142000000	1	21982	200716_dc_IP79_NormalLung-W6Ab_DDA-OTOT-HCD_25cmPepMap2uTT_145m_01.raw	2	2	Q07954|LRP1_HUMAN				0
VPKVPDVHL	41.83	1002.59	9	0	502.3	57.23	56400000	1	36684	200716_dc_IP79_NormalLung-W6Ab_DDA-OTOT-HCD_25cmPepMap2uTT_145m_01.raw	1	1	Q9BXM0|PRAX_HUMAN				0
STGGKAPRKQ	41.82	1028.57	10	-1.6	515.293	10.64	5170000	1	3764	200716_dc_IP79_NormalLung-W6Ab_DDA-OTOT-HCD_25cmPepMap2uTT_145m_01.raw	1	1	Q71DI3|H32_HUMAN:P68431|H31_HUMAN:Q16695|H31T_HUMAN:P84243|H33_HUMAN:Q6NXT2|H3C_HUMAN				1
HAVGIVVNK	41.81	935.555	9	-1.5	468.784	31.99	4110000	1	18903	200716_dc_IP79_NormalLung-W6Ab_DDA-OTOT-HCD_25cmPepMap2uTT_145m_01.raw	1	1	P46778|RL21_HUMAN				1
RLILVGRTGAGK	41.81	1239.78	12	-0.5	414.266	35.53	3620000	1	21437	200716_dc_IP79_NormalLung-W6Ab_DDA-OTOT-HCD_25cmPepMap2uTT_145m_01.raw	1	1	Q8WWP7|GIMA1_HUMAN				0
KPAKTQKTSL	41.8	1100.66	10	-0.6	551.335	18.16	62400000	1	8890	200716_dc_IP79_NormalLung-W6Ab_DDA-OTOT-HCD_25cmPepMap2uTT_145m_01.raw	2	2	O15539|RGS5_HUMAN				1
SVKKKVKNV	41.75	1028.67	9	-0.6	515.342	14.51	941000	1	6451	200716_dc_IP79_NormalLung-W6Ab_DDA-OTOT-HCD_25cmPepMap2uTT_145m_01.raw	1	1	Q9Y5B9|SP16H_HUMAN				0
STPLGQQQPAPRT	41.75	1379.72	13	-1.1	690.864	40.09	3050000	1	24705	200716_dc_IP79_NormalLung-W6Ab_DDA-OTOT-HCD_25cmPepMap2uTT_145m_01.raw	1	1	Q14767|LTBP2_HUMAN				0
TESHHKAKG	41.74	993.499	9	-0.4	497.757	8.29	190000	1	2304	200716_dc_IP79_NormalLung-W6Ab_DDA-OTOT-HCD_25cmPepMap2uTT_145m_01.raw	1	1	P20671|H2A1D_HUMAN:P04908|H2A1B_HUMAN:Q93077|H2A1C_HUMAN:Q7L7L0|H2A3_HUMAN:P0C0S8|H2A1_HUMAN:Q6FI13|H2A2A_HUMAN				0
RPRPSSVLRTL	41.74	1280.77	11	-1.9	427.929	41.71	193000000	1	25757	200716_dc_IP79_NormalLung-W6Ab_DDA-OTOT-HCD_25cmPepMap2uTT_145m_01.raw	1	1	Q9NTK1|DEPP1_HUMAN				1
SVYAGAGGSGSR	41.73	1067.5	12	-0.3	534.757	30.18	15000000	1	17605	200716_dc_IP79_NormalLung-W6Ab_DDA-OTOT-HCD_25cmPepMap2uTT_145m_01.raw	1	1	P05783|K1C18_HUMAN				1
TRLKTKENLEKTR	41.73	1615.94	13	-0.9	539.652	25.71	4790000	1	14438	200716_dc_IP79_NormalLung-W6Ab_DDA-OTOT-HCD_25cmPepMap2uTT_145m_01.raw	1	1	Q6NZI2|CAVN1_HUMAN				0
TLVITDKEKAEK	41.73	1373.78	12	-0.3	458.933	31.16	10300000	1	18313	200716_dc_IP79_NormalLung-W6Ab_DDA-OTOT-HCD_25cmPepMap2uTT_145m_01.raw	1	1	P63173|RL38_HUMAN				1
KYLQEEVNINRKK	41.65	1660.93	13	-2.1	554.648	34.06	12000000	1	20421	200716_dc_IP79_NormalLung-W6Ab_DDA-OTOT-HCD_25cmPepMap2uTT_145m_01.raw	2	2	Q9UHD8|SEPT9_HUMAN				0
TGPPVSELITKA	41.63	1211.68	12	-0.5	606.845	65.39	27800000	1	42480	200716_dc_IP79_NormalLung-W6Ab_DDA-OTOT-HCD_25cmPepMap2uTT_145m_01.raw	1	1	P16401|H15_HUMAN				0
AAGYDVEKNNS	41.63	1166.52	11	-0.2	584.267	32.86	7740000	1	19553	200716_dc_IP79_NormalLung-W6Ab_DDA-OTOT-HCD_25cmPepMap2uTT_145m_01.raw	1	1	P16403|H12_HUMAN:P10412|H14_HUMAN:P16402|H13_HUMAN:Q02539|H11_HUMAN:P22492|H1T_HUMAN				0
KAFSRQNIEK	41.62	1219.67	10	-0.7	610.841	27.13	130000000	1	15469	200716_dc_IP79_NormalLung-W6Ab_DDA-OTOT-HCD_25cmPepMap2uTT_145m_01.raw	2	2	O95810|CAVN2_HUMAN				0
QENSSDYQSNLA	41.61	1354.56	12	-0.6	678.289	49.09	21300000	1	31042	200716_dc_IP79_NormalLung-W6Ab_DDA-OTOT-HCD_25cmPepMap2uTT_145m_01.raw	1	1	P55795|HNRH2_HUMAN				1
TAVYKVPPFTF	41.58	1268.68	11	0.7	635.348	84.83	1560000	1	56247	200716_dc_IP79_NormalLung-W6Ab_DDA-OTOT-HCD_25cmPepMap2uTT_145m_01.raw	1	1	Q6NZI2|CAVN1_HUMAN				0
MFGGPGTASRPS	41.58	1163.54	12	-1.2	582.776	44.22	7300000	1	27577	200716_dc_IP79_NormalLung-W6Ab_DDA-OTOT-HCD_25cmPepMap2uTT_145m_01.raw	1	1	P08670|VIME_HUMAN				0
SGSFVVVQK	41.58	949.523	9	-1.4	475.768	44.47	8320000	1	27765	200716_dc_IP79_NormalLung-W6Ab_DDA-OTOT-HCD_25cmPepMap2uTT_145m_01.raw	1	1	Q5SSJ5|HP1B3_HUMAN				0
DISSALRVNPAL	41.57	1254.69	12	-0.8	628.353	80.67	3630000	1	53241	200716_dc_IP79_NormalLung-W6Ab_DDA-OTOT-HCD_25cmPepMap2uTT_145m_01.raw	1	1	P13489|RINI_HUMAN				0
RTKNFIFRTK	41.56	1309.76	10	-0.4	655.888	30.91	147000000	1	18207	200716_dc_IP79_NormalLung-W6Ab_DDA-OTOT-HCD_25cmPepMap2uTT_145m_01.raw	2	2	P35869|AHR_HUMAN				1
KAAGAGKVTK	41.55	929.566	10	-0.7	465.79	11.82	3120000	1	4558	200716_dc_IP79_NormalLung-W6Ab_DDA-OTOT-HCD_25cmPepMap2uTT_145m_01.raw	2	2	P68104|EF1A1_HUMAN:Q5VTE0|EF1A3_HUMAN				1
KSVLTDPAKLK	41.54	1198.73	11	-0.6	400.583	36.02	10100000	1	21736	200716_dc_IP79_NormalLung-W6Ab_DDA-OTOT-HCD_25cmPepMap2uTT_145m_01.raw	1	1	Q9Y4C1|KDM3A_HUMAN				0
TYIPPKGETKK	41.53	1260.71	11	-1.2	421.243	26.05	24700000	1	14638	200716_dc_IP79_NormalLung-W6Ab_DDA-OTOT-HCD_25cmPepMap2uTT_145m_01.raw	1	1	P09429|HMGB1_HUMAN:B2RPK0|HGB1A_HUMAN				0
HVPGGGNVQIQNK	41.51	1346.71	13	-1	449.909	32.13	1590000	1	19023	200716_dc_IP79_NormalLung-W6Ab_DDA-OTOT-HCD_25cmPepMap2uTT_145m_01.raw	1	1	P27816|MAP4_HUMAN				0
AEKAYHEQL	41.5	1087.53	9	-1.9	544.771	30.87	75100000	1	18096	200716_dc_IP79_NormalLung-W6Ab_DDA-OTOT-HCD_25cmPepMap2uTT_145m_01.raw	2	2	P68363|TBA1B_HUMAN:Q71U36|TBA1A_HUMAN:Q9BQE3|TBA1C_HUMAN:P0DPH8|TBA3D_HUMAN:P0DPH7|TBA3C_HUMAN:Q6PEY2|TBA3E_HUMAN:P68366|TBA4A_HUMAN:Q9NY65|TBA8_HUMAN				1
SSFGGLGGGSVR	41.5	1079.54	12	-0.6	540.775	49.53	4260000	1	31371	200716_dc_IP79_NormalLung-W6Ab_DDA-OTOT-HCD_25cmPepMap2uTT_145m_01.raw	1	1	P08727|K1C19_HUMAN				0
TNTSAPDLKNVR	41.5	1314.69	12	-0.7	439.237	37.4	18600000	1	22723	200716_dc_IP79_NormalLung-W6Ab_DDA-OTOT-HCD_25cmPepMap2uTT_145m_01.raw	1	1	P27816|MAP4_HUMAN				0
AFLIEEQKIVVK	41.48	1415.84	12	-1.1	708.926	64.43	1890000	1	41934	200716_dc_IP79_NormalLung-W6Ab_DDA-OTOT-HCD_25cmPepMap2uTT_145m_01.raw	1	1	P49207|RL34_HUMAN				1
KAKKPAAATVTKK	41.46	1340.85	13	-0.5	447.957	14.03	4930000	1	6057	200716_dc_IP79_NormalLung-W6Ab_DDA-OTOT-HCD_25cmPepMap2uTT_145m_01.raw	2	2	P16403|H12_HUMAN				0
N(+.98)LRDYFEKYGK	41.46	1432.7	11	-1.7	478.573	68.05	1000000	1	44560	200716_dc_IP79_NormalLung-W6Ab_DDA-OTOT-HCD_25cmPepMap2uTT_145m_01.raw	1	1	P51991|ROA3_HUMAN	Deamidation (NQ)	N1:Deamidation (NQ):1000.00		0
VAAM(+15.99)PRPVSY	41.45	1105.56	10	-1.3	553.786	42.79	5490000	1	26619	200716_dc_IP79_NormalLung-W6Ab_DDA-OTOT-HCD_25cmPepMap2uTT_145m_01.raw	1	1	Q6TFL4|KLH24_HUMAN	Oxidation (M)	M4:Oxidation (M):1000.00		0
APSAAKLLVQL	41.44	1109.68	11	-1.8	555.847	75.44	0	1	49605	200716_dc_IP79_NormalLung-W6Ab_DDA-OTOT-HCD_25cmPepMap2uTT_145m_01.raw	0	0	Q15751|HERC1_HUMAN				1
SAVGFEYQGKTEK	41.44	1442.7	13	-0.9	481.908	40.68	2960000	1	25127	200716_dc_IP79_NormalLung-W6Ab_DDA-OTOT-HCD_25cmPepMap2uTT_145m_01.raw	1	1	Q14247|SRC8_HUMAN				0
HGDSDLQLDR	41.43	1154.53	10	-0.6	578.273	36.27	9140000	1	21951	200716_dc_IP79_NormalLung-W6Ab_DDA-OTOT-HCD_25cmPepMap2uTT_145m_01.raw	1	1	P07437|TBB5_HUMAN				0
IGNSTLLRIIYK	41.43	1389.83	12	-0.5	695.924	70.37	7060000	1	46244	200716_dc_IP79_NormalLung-W6Ab_DDA-OTOT-HCD_25cmPepMap2uTT_145m_01.raw	2	2	P24530|EDNRB_HUMAN				0
HVSHGHGRIGKHR	41.43	1476.79	13	-3.7	370.204	14.6	2020000	1	6511	200716_dc_IP79_NormalLung-W6Ab_DDA-OTOT-HCD_25cmPepMap2uTT_145m_01.raw	1	1	P46776|RL27A_HUMAN				1
RVQKKTFTK	41.43	1134.69	9	-0.5	379.236	16.29	1370000	1	7712	200716_dc_IP79_NormalLung-W6Ab_DDA-OTOT-HCD_25cmPepMap2uTT_145m_01.raw	1	1	Q15149|PLEC_HUMAN:Q9UPN3|MACF1_HUMAN				1
SLYASSPGGVYAT	41.42	1271.6	13	-1	636.808	66.86	24700000	1	43635	200716_dc_IP79_NormalLung-W6Ab_DDA-OTOT-HCD_25cmPepMap2uTT_145m_01.raw	1	1	P08670|VIME_HUMAN				0
RLKQIEEQTK	41.41	1271.72	10	-0.9	424.913	26.98	52900000	1	15318	200716_dc_IP79_NormalLung-W6Ab_DDA-OTOT-HCD_25cmPepMap2uTT_145m_01.raw	2	2	P26038|MOES_HUMAN				0
RPRPGTGLGRVM	41.4	1295.72	12	-1.4	432.915	36.57	49100000	1	22099	200716_dc_IP79_NormalLung-W6Ab_DDA-OTOT-HCD_25cmPepMap2uTT_145m_01.raw	1	1	Q9BVK6|TMED9_HUMAN				1
FGGGGSYNDFGNY	41.39	1353.53	13	-0.6	677.77	77.07	13400000	1	50629	200716_dc_IP79_NormalLung-W6Ab_DDA-OTOT-HCD_25cmPepMap2uTT_145m_01.raw	1	1	P09651|ROA1_HUMAN:Q32P51|RA1L2_HUMAN				0
LITKAVAASKER	41.38	1285.77	12	-0.2	429.598	29.1	2380000	1	16892	200716_dc_IP79_NormalLung-W6Ab_DDA-OTOT-HCD_25cmPepMap2uTT_145m_01.raw	1	1	P16403|H12_HUMAN:P10412|H14_HUMAN:P16402|H13_HUMAN:P16401|H15_HUMAN				0
APKEVNIDHF	41.38	1168.59	10	-1.9	585.3	47.22	27500000	1	29716	200716_dc_IP79_NormalLung-W6Ab_DDA-OTOT-HCD_25cmPepMap2uTT_145m_01.raw	2	2	O15539|RGS5_HUMAN				0
QPYEKKAAKL	41.38	1174.67	10	-1.2	588.342	27.18	51700000	1	15501	200716_dc_IP79_NormalLung-W6Ab_DDA-OTOT-HCD_25cmPepMap2uTT_145m_01.raw	2	2	P09429|HMGB1_HUMAN				0
TM(+15.99)KGFEYILAK	41.37	1315.68	11	-1.6	439.568	56	16000000	1	35919	200716_dc_IP79_NormalLung-W6Ab_DDA-OTOT-HCD_25cmPepMap2uTT_145m_01.raw	2	2	Q9Y255|PRLD1_HUMAN	Oxidation (M)	M2:Oxidation (M):1000.00		0
TGRVYNVTQHAVG	41.35	1400.72	13	-0.9	467.912	39.07	20100000	1	23937	200716_dc_IP79_NormalLung-W6Ab_DDA-OTOT-HCD_25cmPepMap2uTT_145m_01.raw	2	2	P46778|RL21_HUMAN				0
HDGYGSHGP	41.32	925.368	9	-0.6	463.691	26.25	3870000	1	14824	200716_dc_IP79_NormalLung-W6Ab_DDA-OTOT-HCD_25cmPepMap2uTT_145m_01.raw	1	1	Q8WVV9|HNRLL_HUMAN				1
AFKELQSTFK	41.31	1197.64	10	-0.1	599.827	48.89	14200000	1	30956	200716_dc_IP79_NormalLung-W6Ab_DDA-OTOT-HCD_25cmPepMap2uTT_145m_01.raw	2	2	Q96C19|EFHD2_HUMAN				1
TTAEGMAKKVTK	41.31	1263.69	12	-1	422.235	29.04	10100000	1	16810	200716_dc_IP79_NormalLung-W6Ab_DDA-OTOT-HCD_25cmPepMap2uTT_145m_01.raw	1	1	Q92522|H1X_HUMAN				1
TKKNKEEAAEYAK	41.3	1508.78	13	-1.3	503.934	24.19	12300000	1	13195	200716_dc_IP79_NormalLung-W6Ab_DDA-OTOT-HCD_25cmPepMap2uTT_145m_01.raw	2	2	P62753|RS6_HUMAN				0
IGFFKRPLK	41.29	1104.68	9	-0.8	553.347	44.67	272000000	1	27889	200716_dc_IP79_NormalLung-W6Ab_DDA-OTOT-HCD_25cmPepMap2uTT_145m_01.raw	2	2	P56199|ITA1_HUMAN				0
SMKMVAAAKYAR	41.28	1325.69	12	-1	442.905	36.52	2190000	1	22168	200716_dc_IP79_NormalLung-W6Ab_DDA-OTOT-HCD_25cmPepMap2uTT_145m_01.raw	1	1	P36542|ATPG_HUMAN				0
N(+.98)FGIGQDIQPK	41.28	1216.61	11	-1.6	609.311	66.37	11400000	1	43317	200716_dc_IP79_NormalLung-W6Ab_DDA-OTOT-HCD_25cmPepMap2uTT_145m_01.raw	1	1	P62424|RL7A_HUMAN	Deamidation (NQ)	N1:Deamidation (NQ):64.28		0
RPLSKTVRF	41.28	1102.66	9	-1.9	368.56	34.15	76600000	1	20657	200716_dc_IP79_NormalLung-W6Ab_DDA-OTOT-HCD_25cmPepMap2uTT_145m_01.raw	1	1	P62280|RS11_HUMAN				1
KFQAHKPAK	41.27	1053.61	9	-0.8	527.811	16.39	37000000	1	7921	200716_dc_IP79_NormalLung-W6Ab_DDA-OTOT-HCD_25cmPepMap2uTT_145m_01.raw	2	2	Q9UNZ5|L10K_HUMAN				0
HQTSAESWGTGRA	41.21	1386.63	13	-0.8	463.216	33.76	16300000	1	20171	200716_dc_IP79_NormalLung-W6Ab_DDA-OTOT-HCD_25cmPepMap2uTT_145m_01.raw	2	2	P36578|RL4_HUMAN				1
TSAKPSSTTPRLS	41.21	1331.7	13	-1.9	444.908	30.96	8050000	1	18239	200716_dc_IP79_NormalLung-W6Ab_DDA-OTOT-HCD_25cmPepMap2uTT_145m_01.raw	1	1	P27816|MAP4_HUMAN				0
DYDALDVANKIG	41.2	1292.62	12	-1	647.319	76.03	1690000	1	50006	200716_dc_IP79_NormalLung-W6Ab_DDA-OTOT-HCD_25cmPepMap2uTT_145m_01.raw	1	1	P62750|RL23A_HUMAN				0
SAYGGPVGAGIR	41.2	1103.57	12	-1	552.793	48.11	2430000	1	30431	200716_dc_IP79_NormalLung-W6Ab_DDA-OTOT-HCD_25cmPepMap2uTT_145m_01.raw	1	1	P08729|K2C7_HUMAN				0
TGAAGKFKRGK	41.19	1119.65	11	-0.7	374.224	16.93	3090000	1	8133	200716_dc_IP79_NormalLung-W6Ab_DDA-OTOT-HCD_25cmPepMap2uTT_145m_01.raw	1	1	P39748|FEN1_HUMAN				1
KQKEVEQLIKK	41.19	1369.83	11	-0.7	457.617	28.55	45300000	1	16431	200716_dc_IP79_NormalLung-W6Ab_DDA-OTOT-HCD_25cmPepMap2uTT_145m_01.raw	1	1	P25789|PSA4_HUMAN				1
SLDNFFAKRDK	41.17	1339.69	11	-1.5	670.851	47.98	13400000	1	30331	200716_dc_IP79_NormalLung-W6Ab_DDA-OTOT-HCD_25cmPepMap2uTT_145m_01.raw	2	2	Q9UKY7|CDV3_HUMAN				0
FVVHM(+15.99)KQKGKK	41.16	1344.77	11	-0.4	449.264	15.8	2190000	1	7311	200716_dc_IP79_NormalLung-W6Ab_DDA-OTOT-HCD_25cmPepMap2uTT_145m_01.raw	1	1	P60903|S10AA_HUMAN	Oxidation (M)	M5:Oxidation (M):1000.00		0
TEVLKTHGLLV	41.16	1208.71	11	-0.9	605.363	56.68	10400000	1	36409	200716_dc_IP79_NormalLung-W6Ab_DDA-OTOT-HCD_25cmPepMap2uTT_145m_01.raw	1	1	P40429|RL13A_HUMAN				1
AYKNVKFVLK	41.11	1208.73	10	-1.2	403.916	40.83	33800000	1	25181	200716_dc_IP79_NormalLung-W6Ab_DDA-OTOT-HCD_25cmPepMap2uTT_145m_01.raw	2	2	Q9UNL2|SSRG_HUMAN				1
HGGM(+15.99)QGGFGGQS	41.1	1134.45	12	-0.6	568.233	29.34	8740000	1	17048	200716_dc_IP79_NormalLung-W6Ab_DDA-OTOT-HCD_25cmPepMap2uTT_145m_01.raw	1	1	Q15424|SAFB1_HUMAN	Oxidation (M)	M4:Oxidation (M):1000.00		0
YYKNIGLGFKTPK	41.09	1527.84	13	-3	510.287	50.51	0	1	32115	200716_dc_IP79_NormalLung-W6Ab_DDA-OTOT-HCD_25cmPepMap2uTT_145m_01.raw	0	0	P62280|RS11_HUMAN				0
HGLYEKKKT	41.08	1102.61	9	0	368.545	15.57	3150000	1	7200	200716_dc_IP79_NormalLung-W6Ab_DDA-OTOT-HCD_25cmPepMap2uTT_145m_01.raw	2	2	P62847|RS24_HUMAN				0
TVGMNFKTPRGPV	41.07	1402.74	13	-0.4	468.587	54.81	20400000	1	34997	200716_dc_IP79_NormalLung-W6Ab_DDA-OTOT-HCD_25cmPepMap2uTT_145m_01.raw	1	1	P08708|RS17_HUMAN				0
RPKHVVVKF	41.06	1108.69	9	-0.3	370.57	29.24	12400000	1	16931	200716_dc_IP79_NormalLung-W6Ab_DDA-OTOT-HCD_25cmPepMap2uTT_145m_01.raw	1	1	Q9Y4F1|FARP1_HUMAN				0
KAASGEAKPKVKK	41.05	1340.81	13	-1.2	447.945	12.93	0	1	5367	200716_dc_IP79_NormalLung-W6Ab_DDA-OTOT-HCD_25cmPepMap2uTT_145m_01.raw	0	0	P16403|H12_HUMAN				0
RALLSLRSPK	41.03	1139.71	10	0.3	380.912	39.12	2820000	1	24006	200716_dc_IP79_NormalLung-W6Ab_DDA-OTOT-HCD_25cmPepMap2uTT_145m_01.raw	1	1	Q9UNF1|MAGD2_HUMAN				0
RAKSFFDVALK	40.99	1280.72	11	-2	427.914	54.61	20700000	1	34957	200716_dc_IP79_NormalLung-W6Ab_DDA-OTOT-HCD_25cmPepMap2uTT_145m_01.raw	1	1	P35869|AHR_HUMAN				0
KSKNILFVITK	40.99	1289.81	11	-0.8	645.91	49.78	54400000	1	31537	200716_dc_IP79_NormalLung-W6Ab_DDA-OTOT-HCD_25cmPepMap2uTT_145m_01.raw	2	2	E9PAV3|NACAM_HUMAN:Q13765|NACA_HUMAN:Q9BZK3|NACP4_HUMAN:Q9H009|NACA2_HUMAN				1
HSSTPNSSEFSRK	40.97	1462.68	13	-1.9	488.566	27.52	1850000	1	15789	200716_dc_IP79_NormalLung-W6Ab_DDA-OTOT-HCD_25cmPepMap2uTT_145m_01.raw	1	1	Q8N9Q2|SR1IP_HUMAN				0
SAPAPKKGSKK	40.95	1097.66	11	0.3	366.893	8.9	6960000	1	2752	200716_dc_IP79_NormalLung-W6Ab_DDA-OTOT-HCD_25cmPepMap2uTT_145m_01.raw	2	2	P62807|H2B1C_HUMAN:O60814|H2B1K_HUMAN:P57053|H2BFS_HUMAN:Q93079|H2B1H_HUMAN:Q5QNW6|H2B2F_HUMAN:Q16778|H2B2E_HUMAN:P06899|H2B1J_HUMAN:Q99877|H2B1N_HUMAN:P58876|H2B1D_HUMAN:Q99880|H2B1L_HUMAN:P23527|H2B1O_HUMAN:Q8N257|H2B3B_HUMAN:P33778|H2B1B_HUMAN				0
APNAILEVHVL	40.95	1174.67	11	-0.6	588.342	79.19	4990000	1	52201	200716_dc_IP79_NormalLung-W6Ab_DDA-OTOT-HCD_25cmPepMap2uTT_145m_01.raw	1	1	P17813|EGLN_HUMAN				0
TKTPGPGAQSA	40.95	1013.51	11	-1.9	507.763	28.3	4270000	1	16281	200716_dc_IP79_NormalLung-W6Ab_DDA-OTOT-HCD_25cmPepMap2uTT_145m_01.raw	1	1	P62263|RS14_HUMAN				0
HEKM(+15.99)HEGDEGPGH	40.92	1474.59	13	-1.3	492.536	15.13	1350000	1	6809	200716_dc_IP79_NormalLung-W6Ab_DDA-OTOT-HCD_25cmPepMap2uTT_145m_01.raw	1	1	P06702|S10A9_HUMAN	Oxidation (M)	M4:Oxidation (M):1000.00		0
GPQAVGAVKAL	40.88	1009.59	11	-1.4	505.803	49.49	4780000	1	31364	200716_dc_IP79_NormalLung-W6Ab_DDA-OTOT-HCD_25cmPepMap2uTT_145m_01.raw	1	1	Q96QR1|SG3A1_HUMAN				0
APRPASGPIRP	40.88	1117.64	11	0.8	373.553	32.83	0	1	19534	200716_dc_IP79_NormalLung-W6Ab_DDA-OTOT-HCD_25cmPepMap2uTT_145m_01.raw	0	0	P26373|RL13_HUMAN				1
SVKEQGLFHKK	40.87	1299.73	11	-1	434.25	26.78	9030000	1	15238	200716_dc_IP79_NormalLung-W6Ab_DDA-OTOT-HCD_25cmPepMap2uTT_145m_01.raw	1	1	Q709C8|VP13C_HUMAN				0
HLYDPKM(+15.99)QTDKP	40.86	1487.71	12	-1	496.909	33.14	55900000	1	19599	200716_dc_IP79_NormalLung-W6Ab_DDA-OTOT-HCD_25cmPepMap2uTT_145m_01.raw	1	1	Q15417|CNN3_HUMAN	Oxidation (M)	M7:Oxidation (M):1000.00		0
HGGQQKPSYGSG	40.86	1201.55	12	-1.6	601.78	25.46	1080000	1	14221	200716_dc_IP79_NormalLung-W6Ab_DDA-OTOT-HCD_25cmPepMap2uTT_145m_01.raw	1	1	Q12906|ILF3_HUMAN				0
HPISDHEATL	40.84	1118.54	10	-0.7	560.275	35.78	40800000	1	21532	200716_dc_IP79_NormalLung-W6Ab_DDA-OTOT-HCD_25cmPepMap2uTT_145m_01.raw	1	1	P30480|1B42_HUMAN:P01889|1B07_HUMAN:Q31610|1B81_HUMAN:P30460|1B08_HUMAN:P30486|1B48_HUMAN:Q29836|1B67_HUMAN:Q31612|1B73_HUMAN:Q95365|1B38_HUMAN:P30475|1B39_HUMAN:P30462|1B14_HUMAN:P13747|HLAE_HUMAN:Q29718|1B82_HUMAN:P30455|1A36_HUMAN:P04439|1A03_HUMAN:P13746|1A11_HUMAN:P30443|1A01_HUMAN:P16188|1A30_HUMAN:P18463|1B37_HUMAN:P30495|1B56_HUMAN:P30493|1B55_HUMAN:P01893|HLAH_HUMAN:P30492|1B54_HUMAN:P05…				1
HPLSDHEATL	40.84	1118.54	10	-0.7	560.275	35.78	40800000	1	21532	200716_dc_IP79_NormalLung-W6Ab_DDA-OTOT-HCD_25cmPepMap2uTT_145m_01.raw	1	1	P10321|1C07_HUMAN				1
TYGASSTTSTGR	40.81	1187.54	12	-0.7	594.778	29.73	6060000	1	17326	200716_dc_IP79_NormalLung-W6Ab_DDA-OTOT-HCD_25cmPepMap2uTT_145m_01.raw	1	1	Q92841|DDX17_HUMAN				1
GGPGTASRPSSSR	40.81	1215.6	13	-0.7	608.805	25.56	90000000	1	14295	200716_dc_IP79_NormalLung-W6Ab_DDA-OTOT-HCD_25cmPepMap2uTT_145m_01.raw	2	2	P08670|VIME_HUMAN				1
HPKTHVTHH	40.81	1092.56	9	-0.1	365.193	11.82	3820000	1	4557	200716_dc_IP79_NormalLung-W6Ab_DDA-OTOT-HCD_25cmPepMap2uTT_145m_01.raw	2	2	Q29960|1C16_HUMAN:P04222|1C03_HUMAN:P30499|1C01_HUMAN:P30504|1C04_HUMAN:P30505|1C08_HUMAN:Q29963|1C06_HUMAN:Q29865|1C18_HUMAN:P30510|1C14_HUMAN:Q9TNN7|1C05_HUMAN:P30508|1C12_HUMAN:Q07000|1C15_HUMAN:P30501|1C02_HUMAN				0
KAKHYHKEY	40.79	1202.62	9	-0.2	602.317	13.49	16100000	1	5712	200716_dc_IP79_NormalLung-W6Ab_DDA-OTOT-HCD_25cmPepMap2uTT_145m_01.raw	2	2	P18124|RL7_HUMAN				1
TGAAPIIDVVR	40.78	1110.64	11	-1.4	1111.65	63.05	133000000	1	40862	200716_dc_IP79_NormalLung-W6Ab_DDA-OTOT-HCD_25cmPepMap2uTT_145m_01.raw	2	2	P46776|RL27A_HUMAN				0
RTKDKLFQFLK	40.75	1422.83	11	-0.6	475.285	50.57	14400000	1	32078	200716_dc_IP79_NormalLung-W6Ab_DDA-OTOT-HCD_25cmPepMap2uTT_145m_01.raw	2	2	Q9NR00|TCIM_HUMAN				0
TPAKKTVTPAK	40.73	1140.69	11	-1.8	381.236	20.26	1100000	1	10444	200716_dc_IP79_NormalLung-W6Ab_DDA-OTOT-HCD_25cmPepMap2uTT_145m_01.raw	1	1	P19338|NUCL_HUMAN				0
VPAPVPLM(+15.99)SL	40.72	1038.58	10	-1.3	520.296	82.65	2120000	1	54847	200716_dc_IP79_NormalLung-W6Ab_DDA-OTOT-HCD_25cmPepMap2uTT_145m_01.raw	1	1	Q9UQ35|SRRM2_HUMAN	Oxidation (M)	M8:Oxidation (M):1000.00		0
RLKTEAEIALK	40.66	1270.76	11	-0.8	424.594	37.99	8810000	1	23185	200716_dc_IP79_NormalLung-W6Ab_DDA-OTOT-HCD_25cmPepMap2uTT_145m_01.raw	1	1	Q15149|PLEC_HUMAN				1
SGTLREYKVVGR	40.66	1363.76	12	-0.8	455.593	35.78	2820000	1	21639	200716_dc_IP79_NormalLung-W6Ab_DDA-OTOT-HCD_25cmPepMap2uTT_145m_01.raw	1	1	Q02543|RL18A_HUMAN				1
KAGGTKPKKPVG	40.66	1166.71	12	-1.7	389.911	15.33	29900000	1	6958	200716_dc_IP79_NormalLung-W6Ab_DDA-OTOT-HCD_25cmPepMap2uTT_145m_01.raw	2	2	P16403|H12_HUMAN				0
LPVEYEIDKTL	40.65	1318.7	11	-1.8	660.357	76.03	1130000	1	50027	200716_dc_IP79_NormalLung-W6Ab_DDA-OTOT-HCD_25cmPepMap2uTT_145m_01.raw	1	1	P41252|SYIC_HUMAN				0
VPNKVIQC(+119.00)F	40.65	1165.56	9	-0.2	583.788	52.04	3250000	1	33204	200716_dc_IP79_NormalLung-W6Ab_DDA-OTOT-HCD_25cmPepMap2uTT_145m_01.raw	1	1	Q00610|CLH1_HUMAN	Cysteinylation	C8:Cysteinylation:1000.00		0
YYKVDENGKISRL	40.65	1583.83	13	-0.5	528.951	46	14400000	1	28888	200716_dc_IP79_NormalLung-W6Ab_DDA-OTOT-HCD_25cmPepMap2uTT_145m_01.raw	2	2	P62979|RS27A_HUMAN				0
GASGSFVVVQK	40.64	1077.58	11	-1.3	539.798	46.53	8410000	1	29326	200716_dc_IP79_NormalLung-W6Ab_DDA-OTOT-HCD_25cmPepMap2uTT_145m_01.raw	1	1	Q5SSJ5|HP1B3_HUMAN				0
FEDNAGVIVNNK	40.64	1318.65	12	-2.9	660.331	50.76	1710000	1	32349	200716_dc_IP79_NormalLung-W6Ab_DDA-OTOT-HCD_25cmPepMap2uTT_145m_01.raw	1	1	P62829|RL23_HUMAN				0
GDKAKVKDEPQRR	40.63	1525.83	13	-0.1	382.465	17.28	16200000	1	8278	200716_dc_IP79_NormalLung-W6Ab_DDA-OTOT-HCD_25cmPepMap2uTT_145m_01.raw	2	2	P05204|HMGN2_HUMAN:O00479|HMGN4_HUMAN				0
NPVHNGHAL	40.62	957.478	9	-0.9	479.746	27.38	4860000	1	15642	200716_dc_IP79_NormalLung-W6Ab_DDA-OTOT-HCD_25cmPepMap2uTT_145m_01.raw	1	1	O95340|PAPS2_HUMAN:O43252|PAPS1_HUMAN				1
FDTASTGKTFPG	40.6	1227.58	12	-0.1	614.796	52.83	33400000	1	33636	200716_dc_IP79_NormalLung-W6Ab_DDA-OTOT-HCD_25cmPepMap2uTT_145m_01.raw	1	1	P02671|FIBA_HUMAN				0
SPSRQLVGRTF	40.56	1246.68	11	-0.8	416.566	43.68	18000000	1	27221	200716_dc_IP79_NormalLung-W6Ab_DDA-OTOT-HCD_25cmPepMap2uTT_145m_01.raw	2	2	Q86UU1|PHLB1_HUMAN				0
KAKKPAAAGVK	40.55	1067.68	11	0.7	356.901	13.2	51000000	1	5464	200716_dc_IP79_NormalLung-W6Ab_DDA-OTOT-HCD_25cmPepMap2uTT_145m_01.raw	2	2	P16401|H15_HUMAN				0
HQGVM(+15.99)VGM(+15.99)GQKDS	40.55	1404.61	13	-1.6	469.211	27.18	4600000	1	15507	200716_dc_IP79_NormalLung-W6Ab_DDA-OTOT-HCD_25cmPepMap2uTT_145m_01.raw	1	1	P60709|ACTB_HUMAN:P63261|ACTG_HUMAN:P68032|ACTC_HUMAN:P62736|ACTA_HUMAN:P68133|ACTS_HUMAN:P63267|ACTH_HUMAN	Oxidation (M)	M5:Oxidation (M):1000.00;M8:Oxidation (M):1000.00		0
AEDVLSGKVSA	40.54	1074.56	11	-0.6	538.285	49.88	12100000	1	31619	200716_dc_IP79_NormalLung-W6Ab_DDA-OTOT-HCD_25cmPepMap2uTT_145m_01.raw	1	1	O00303|EIF3F_HUMAN				1
VPHLSKPNHTL	40.52	1241.69	11	-1.6	621.85	35.87	33600000	1	21676	200716_dc_IP79_NormalLung-W6Ab_DDA-OTOT-HCD_25cmPepMap2uTT_145m_01.raw	2	2	Q96PP9|GBP4_HUMAN				0
APLLRHLGL	40.5	988.618	9	-0.8	495.316	58.7	18800000	1	37831	200716_dc_IP79_NormalLung-W6Ab_DDA-OTOT-HCD_25cmPepMap2uTT_145m_01.raw	1	1	Q9BTA0|F167B_HUMAN				0
QENSSDFQSNIA	40.49	1338.57	12	-0.7	670.291	56.19	102000000	1	36031	200716_dc_IP79_NormalLung-W6Ab_DDA-OTOT-HCD_25cmPepMap2uTT_145m_01.raw	1	1	P31943|HNRH1_HUMAN				1
TLSKEEETKK	40.49	1191.63	10	-0.5	596.824	17.77	63500000	1	8677	200716_dc_IP79_NormalLung-W6Ab_DDA-OTOT-HCD_25cmPepMap2uTT_145m_01.raw	2	2	P84098|RL19_HUMAN				1
TRLKTKENLEK	40.48	1358.79	11	-1.1	453.936	25.61	116000000	1	14310	200716_dc_IP79_NormalLung-W6Ab_DDA-OTOT-HCD_25cmPepMap2uTT_145m_01.raw	2	2	Q6NZI2|CAVN1_HUMAN				0
APASALVRIPL	40.47	1106.68	11	0	554.348	76.62	3050000	1	50316	200716_dc_IP79_NormalLung-W6Ab_DDA-OTOT-HCD_25cmPepMap2uTT_145m_01.raw	1	1	P07339|CATD_HUMAN				1
SYEIRAVGNK	40.44	1135.6	10	-1.7	568.806	36.22	9600000	1	21888	200716_dc_IP79_NormalLung-W6Ab_DDA-OTOT-HCD_25cmPepMap2uTT_145m_01.raw	2	2	Q08211|DHX9_HUMAN				0
YDVEKNNSRIK	40.44	1364.7	11	-1.9	455.908	28.95	36800000	1	16757	200716_dc_IP79_NormalLung-W6Ab_DDA-OTOT-HCD_25cmPepMap2uTT_145m_01.raw	2	2	P16403|H12_HUMAN:P10412|H14_HUMAN:P16402|H13_HUMAN:P16401|H15_HUMAN:Q02539|H11_HUMAN:P22492|H1T_HUMAN				1
TLVTYVPVTTF	40.43	1239.67	11	-0.5	620.845	97.73	5370000	1	65257	200716_dc_IP79_NormalLung-W6Ab_DDA-OTOT-HCD_25cmPepMap2uTT_145m_01.raw	1	1	P62899|RL31_HUMAN				1
LPKGDINIEGPSM	40.43	1369.69	13	-0.8	685.852	65.92	3050000	1	43082	200716_dc_IP79_NormalLung-W6Ab_DDA-OTOT-HCD_25cmPepMap2uTT_145m_01.raw	1	1	Q09666|AHNK_HUMAN				0
KASGTLREY	40.41	1023.53	9	-0.4	1024.54	28.8	360000000	1	16648	200716_dc_IP79_NormalLung-W6Ab_DDA-OTOT-HCD_25cmPepMap2uTT_145m_01.raw	2	2	Q02543|RL18A_HUMAN				1
SSQPLASKQEK	40.37	1201.63	11	-0.8	401.55	25.42	13600000	1	14214	200716_dc_IP79_NormalLung-W6Ab_DDA-OTOT-HCD_25cmPepMap2uTT_145m_01.raw	2	2	P17096|HMGA1_HUMAN				0
HGYGGRFGVER	40.37	1233.6	11	-1.2	412.207	33.86	7220000	1	20278	200716_dc_IP79_NormalLung-W6Ab_DDA-OTOT-HCD_25cmPepMap2uTT_145m_01.raw	1	1	P14317|HCLS1_HUMAN				0
TGGKAPRKQLATK	40.35	1354.8	13	-0.3	452.609	19.83	18100000	1	10303	200716_dc_IP79_NormalLung-W6Ab_DDA-OTOT-HCD_25cmPepMap2uTT_145m_01.raw	1	1	Q71DI3|H32_HUMAN:P68431|H31_HUMAN:Q16695|H31T_HUMAN:P84243|H33_HUMAN:Q6NXT2|H3C_HUMAN				1
SAAELRHVM	40.34	1012.51	9	-1	507.263	38.46	40600000	1	23469	200716_dc_IP79_NormalLung-W6Ab_DDA-OTOT-HCD_25cmPepMap2uTT_145m_01.raw	1	1	P0DP24|CALM2_HUMAN:P0DP23|CALM1_HUMAN:P0DP25|CALM3_HUMAN:P27482|CALL3_HUMAN				1
YDALDVANKIG	40.33	1177.6	11	-2.4	589.805	68.54	5260000	1	44806	200716_dc_IP79_NormalLung-W6Ab_DDA-OTOT-HCD_25cmPepMap2uTT_145m_01.raw	1	1	P62750|RL23A_HUMAN				1
TYSTEPNNLKA	40.32	1236.6	11	-0.3	619.306	42.11	50900000	1	26088	200716_dc_IP79_NormalLung-W6Ab_DDA-OTOT-HCD_25cmPepMap2uTT_145m_01.raw	1	1	P46779|RL28_HUMAN				0
KSSAEVIAQARKK	40.31	1414.83	13	-1.3	472.615	26.35	4060000	1	14918	200716_dc_IP79_NormalLung-W6Ab_DDA-OTOT-HCD_25cmPepMap2uTT_145m_01.raw	1	1	Q16555|DPYL2_HUMAN				0
RFAEVYKAKLK	40.3	1351.8	11	-0.9	451.606	35.43	1580000	1	21379	200716_dc_IP79_NormalLung-W6Ab_DDA-OTOT-HCD_25cmPepMap2uTT_145m_01.raw	1	1	P37173|TGFR2_HUMAN				0
HQQLYWSHPR	40.28	1350.66	10	-0.7	451.226	36.57	1930000	1	22221	200716_dc_IP79_NormalLung-W6Ab_DDA-OTOT-HCD_25cmPepMap2uTT_145m_01.raw	1	1	P62273|RS29_HUMAN				1
TDLKNLFSKYGK	40.28	1412.77	12	-1.8	471.928	59.19	2560000	1	38261	200716_dc_IP79_NormalLung-W6Ab_DDA-OTOT-HCD_25cmPepMap2uTT_145m_01.raw	1	1	Q15424|SAFB1_HUMAN:Q14151|SAFB2_HUMAN				0
TPDAMKAAM(+15.99)AL	40.27	1134.54	11	-6.2	568.274	58.51	73000000	1	38283	200716_dc_IP79_NormalLung-W6Ab_DDA-OTOT-HCD_25cmPepMap2uTT_145m_01.raw	2	2	P02792|FRIL_HUMAN	Oxidation (M)	M9:Oxidation (M):35.82		0
VPNANSIKQM(+15.99)	40.26	1116.56	10	0.2	559.287	36.76	1730000	1	22286	200716_dc_IP79_NormalLung-W6Ab_DDA-OTOT-HCD_25cmPepMap2uTT_145m_01.raw	1	1	P53814|SMTN_HUMAN	Oxidation (M)	M10:Oxidation (M):1000.00		0
VAQYRPEEY	40.24	1153.54	9	-1.3	577.777	44.86	8910000	1	28076	200716_dc_IP79_NormalLung-W6Ab_DDA-OTOT-HCD_25cmPepMap2uTT_145m_01.raw	1	1	Q12959|DLG1_HUMAN:Q92796|DLG3_HUMAN				1
LEGHGLPANLPR	40.23	1272.69	12	-0.9	425.238	49.09	6340000	1	31102	200716_dc_IP79_NormalLung-W6Ab_DDA-OTOT-HCD_25cmPepMap2uTT_145m_01.raw	1	1	Q9NZN4|EHD2_HUMAN				0
RFVNVVPTFGKK	40.2	1390.81	12	-0.5	464.61	51.11	7610000	1	32523	200716_dc_IP79_NormalLung-W6Ab_DDA-OTOT-HCD_25cmPepMap2uTT_145m_01.raw	1	1	P62861|RS30_HUMAN				0
VPPPPPVAL	40.19	885.532	9	-3	443.772	72.93	3790000	1	47602	200716_dc_IP79_NormalLung-W6Ab_DDA-OTOT-HCD_25cmPepMap2uTT_145m_01.raw	1	1	P49750|YLPM1_HUMAN				1
VPKLKVC(+119.00)AL	40.18	1088.61	9	-1.1	545.311	47.91	18600000	1	30247	200716_dc_IP79_NormalLung-W6Ab_DDA-OTOT-HCD_25cmPepMap2uTT_145m_01.raw	2	2	Q07020|RL18_HUMAN	Cysteinylation	C7:Cysteinylation:1000.00		0
KFKLITEDVQGK	40.17	1404.8	12	-1.7	469.272	45.36	7950000	1	28494	200716_dc_IP79_NormalLung-W6Ab_DDA-OTOT-HCD_25cmPepMap2uTT_145m_01.raw	1	1	P61247|RS3A_HUMAN				0
SSHLKGQAVPASK	40.16	1308.71	13	-1.2	437.245	25.91	489000	1	14549	200716_dc_IP79_NormalLung-W6Ab_DDA-OTOT-HCD_25cmPepMap2uTT_145m_01.raw	1	1	Q8N3V7|SYNPO_HUMAN				0
KFKDKFC(+119.00)VY	40.16	1295.6	9	-1.2	648.809	43.38	94100000	1	27043	200716_dc_IP79_NormalLung-W6Ab_DDA-OTOT-HCD_25cmPepMap2uTT_145m_01.raw	2	2	Q8TCU6|PREX1_HUMAN	Cysteinylation	C7:Cysteinylation:1000.00		0
KPPVSITKKKL	40.16	1237.81	11	-2.3	413.61	27.67	4700000	1	15851	200716_dc_IP79_NormalLung-W6Ab_DDA-OTOT-HCD_25cmPepMap2uTT_145m_01.raw	1	1	Q9NPB8|GPCP1_HUMAN				0
HDSSDHHTFK	40.15	1209.52	10	0.1	404.179	16.1	670000	1	7611	200716_dc_IP79_NormalLung-W6Ab_DDA-OTOT-HCD_25cmPepMap2uTT_145m_01.raw	1	1	Q15293|RCN1_HUMAN				0
TIGISVDPRR	40.14	1112.63	10	-0.7	557.322	47.12	196000000	1	29676	200716_dc_IP79_NormalLung-W6Ab_DDA-OTOT-HCD_25cmPepMap2uTT_145m_01.raw	2	2	P26373|RL13_HUMAN				1
HKRKKVKLAVLK	40.12	1446.99	12	0.1	362.754	26	20200000	1	14608	200716_dc_IP79_NormalLung-W6Ab_DDA-OTOT-HCD_25cmPepMap2uTT_145m_01.raw	1	1	P62979|RS27A_HUMAN				0
TYSTEPNNLKAR	40.1	1392.7	12	-5.6	465.238	34.1	3800000	1	20541	200716_dc_IP79_NormalLung-W6Ab_DDA-OTOT-HCD_25cmPepMap2uTT_145m_01.raw	1	1	P46779|RL28_HUMAN				0
KAKKPAAAAGAK	40.1	1110.69	12	-1.1	371.236	11.72	38300000	1	4420	200716_dc_IP79_NormalLung-W6Ab_DDA-OTOT-HCD_25cmPepMap2uTT_145m_01.raw	2	2	P10412|H14_HUMAN				1
SAPAPKKGSKKA	40.09	1168.69	12	-0.1	390.572	10.99	1580000	1	4008	200716_dc_IP79_NormalLung-W6Ab_DDA-OTOT-HCD_25cmPepMap2uTT_145m_01.raw	2	2	P62807|H2B1C_HUMAN:O60814|H2B1K_HUMAN:P57053|H2BFS_HUMAN:Q93079|H2B1H_HUMAN:Q5QNW6|H2B2F_HUMAN:Q16778|H2B2E_HUMAN:P06899|H2B1J_HUMAN:Q99877|H2B1N_HUMAN:P58876|H2B1D_HUMAN:Q99880|H2B1L_HUMAN:P23527|H2B1O_HUMAN:Q8N257|H2B3B_HUMAN:P33778|H2B1B_HUMAN				0
TGANGSFKLN	40.08	1007.5	10	-1.1	504.759	43.68	16800000	1	27203	200716_dc_IP79_NormalLung-W6Ab_DDA-OTOT-HCD_25cmPepMap2uTT_145m_01.raw	1	1	Q92522|H1X_HUMAN				0
KYMAEVKKYK	40.08	1286.71	10	-1.1	429.909	27.77	1140000	1	15938	200716_dc_IP79_NormalLung-W6Ab_DDA-OTOT-HCD_25cmPepMap2uTT_145m_01.raw	1	1	Q9BQ61|TRIR_HUMAN				1
KGSSAVRVY	40.06	965.529	9	-2.2	966.535	29.24	327000000	1	17006	200716_dc_IP79_NormalLung-W6Ab_DDA-OTOT-HCD_25cmPepMap2uTT_145m_01.raw	2	2	P10914|IRF1_HUMAN				1
TGSSGALGPPER	40.04	1127.56	12	-0.3	564.786	37.36	3320000	1	22705	200716_dc_IP79_NormalLung-W6Ab_DDA-OTOT-HCD_25cmPepMap2uTT_145m_01.raw	1	1	Q9BZL4|PP12C_HUMAN				0
TPNKEKTEAK	40.02	1144.61	10	0.7	573.312	11.58	2970000	1	4410	200716_dc_IP79_NormalLung-W6Ab_DDA-OTOT-HCD_25cmPepMap2uTT_145m_01.raw	2	2	P41218|MNDA_HUMAN				0
RPWLEGRHTL	40.01	1263.68	10	-1.1	422.235	43.63	9920000	1	27175	200716_dc_IP79_NormalLung-W6Ab_DDA-OTOT-HCD_25cmPepMap2uTT_145m_01.raw	1	1	Q9UI10|EI2BD_HUMAN				1
AEAEAFLKKA	40.01	1076.59	10	-2	539.299	43.33	34400000	1	26971	200716_dc_IP79_NormalLung-W6Ab_DDA-OTOT-HCD_25cmPepMap2uTT_145m_01.raw	2	2	Q3KQU3|MA7D1_HUMAN				1
KVHPAVVIRQ	40	1145.7	10	0.3	382.909	29.93	3420000	1	17470	200716_dc_IP79_NormalLung-W6Ab_DDA-OTOT-HCD_25cmPepMap2uTT_145m_01.raw	1	1	P62829|RL23_HUMAN				0
TPLGQQQPAPR	39.99	1191.64	11	-1.8	596.824	36.22	1490000	1	21936	200716_dc_IP79_NormalLung-W6Ab_DDA-OTOT-HCD_25cmPepMap2uTT_145m_01.raw	1	1	Q14767|LTBP2_HUMAN				1
TGGKAPRKQ	39.99	941.541	9	-1.1	471.777	9.1	2020000	1	2869	200716_dc_IP79_NormalLung-W6Ab_DDA-OTOT-HCD_25cmPepMap2uTT_145m_01.raw	1	1	Q71DI3|H32_HUMAN:P68431|H31_HUMAN:Q16695|H31T_HUMAN:P84243|H33_HUMAN:Q6NXT2|H3C_HUMAN				0
SPKKAKVAKPK	39.97	1180.77	11	-1.2	394.595	12.57	650000	1	5088	200716_dc_IP79_NormalLung-W6Ab_DDA-OTOT-HCD_25cmPepMap2uTT_145m_01.raw	1	1	P16403|H12_HUMAN				0
IPQSSSSSSRPPT	39.97	1329.65	13	-0.7	665.833	32.28	6980000	1	19091	200716_dc_IP79_NormalLung-W6Ab_DDA-OTOT-HCD_25cmPepMap2uTT_145m_01.raw	1	1	O96013|PAK4_HUMAN				0
TYTESQSSLRSS	39.96	1344.62	12	-1.1	673.314	36.81	2200000	1	22367	200716_dc_IP79_NormalLung-W6Ab_DDA-OTOT-HCD_25cmPepMap2uTT_145m_01.raw	1	1	Q96JY6|PDLI2_HUMAN				0
KPKKATGAATPK	39.93	1196.72	12	-1.6	399.915	12.72	5140000	1	5165	200716_dc_IP79_NormalLung-W6Ab_DDA-OTOT-HCD_25cmPepMap2uTT_145m_01.raw	2	2	P10412|H14_HUMAN				0
VPFPRLHFF	39.92	1158.63	9	-1.7	580.323	82.5	62200000	1	54704	200716_dc_IP79_NormalLung-W6Ab_DDA-OTOT-HCD_25cmPepMap2uTT_145m_01.raw	2	2	P07437|TBB5_HUMAN:P68371|TBB4B_HUMAN:P04350|TBB4A_HUMAN:Q9BVA1|TBB2B_HUMAN:Q13885|TBB2A_HUMAN:Q13509|TBB3_HUMAN:Q9BUF5|TBB6_HUMAN:Q3ZCM7|TBB8_HUMAN:A6NNZ2|TBB8L_HUMAN:Q9H4B7|TBB1_HUMAN				1
YKVPPFTFHVK	39.9	1361.75	11	-1.1	454.923	58.26	12200000	1	37531	200716_dc_IP79_NormalLung-W6Ab_DDA-OTOT-HCD_25cmPepMap2uTT_145m_01.raw	1	1	Q6NZI2|CAVN1_HUMAN				0
HAVGDIPGVRFK	39.9	1294.71	12	-1	432.578	47.81	12000000	1	30153	200716_dc_IP79_NormalLung-W6Ab_DDA-OTOT-HCD_25cmPepMap2uTT_145m_01.raw	1	1	P62266|RS23_HUMAN				1
RPDDVHVNIRL	39.89	1332.73	11	-0.9	445.249	51.4	24500000	1	32696	200716_dc_IP79_NormalLung-W6Ab_DDA-OTOT-HCD_25cmPepMap2uTT_145m_01.raw	1	1	P49792|RBP2_HUMAN:O14715|RGPD8_HUMAN:Q99666|RGPD5_HUMAN:Q7Z3J3|RGPD4_HUMAN:A6NKT7|RGPD3_HUMAN				1
RSAPSGPVR	39.89	925.509	9	-2.2	463.761	26.1	10700000	1	14697	200716_dc_IP79_NormalLung-W6Ab_DDA-OTOT-HCD_25cmPepMap2uTT_145m_01.raw	1	1	P38159|RBMX_HUMAN				0
STESLQANVQRL	39.89	1344.7	12	0.3	673.357	56.58	0	1	36422	200716_dc_IP79_NormalLung-W6Ab_DDA-OTOT-HCD_25cmPepMap2uTT_145m_01.raw	0	0	P26373|RL13_HUMAN				1
HFHKDWQR	39.88	1152.56	8	-1.9	385.192	26.83	17100000	1	15237	200716_dc_IP79_NormalLung-W6Ab_DDA-OTOT-HCD_25cmPepMap2uTT_145m_01.raw	1	1	P26373|RL13_HUMAN				1
YATQLQKTY	39.87	1114.57	9	-1.9	558.289	44.72	497000	1	28008	200716_dc_IP79_NormalLung-W6Ab_DDA-OTOT-HCD_25cmPepMap2uTT_145m_01.raw	1	1	P42229|STA5A_HUMAN				1
RLYFGERNVK	39.87	1280.7	10	-1.1	427.906	36.37	1500000	1	22072	200716_dc_IP79_NormalLung-W6Ab_DDA-OTOT-HCD_25cmPepMap2uTT_145m_01.raw	1	1	P42345|MTOR_HUMAN				1
GASGSFKLNK	39.86	1007.54	10	-0.7	504.777	33.72	38600000	1	20104	200716_dc_IP79_NormalLung-W6Ab_DDA-OTOT-HCD_25cmPepMap2uTT_145m_01.raw	3	3	P16403|H12_HUMAN:P10412|H14_HUMAN:P16402|H13_HUMAN:P16401|H15_HUMAN:Q02539|H11_HUMAN				0
SAAKAVKPK	39.86	898.56	9	0.1	450.287	13.3	3320000	1	5632	200716_dc_IP79_NormalLung-W6Ab_DDA-OTOT-HCD_25cmPepMap2uTT_145m_01.raw	2	2	P16403|H12_HUMAN				1
APKSQDLAKIM(+15.99)	39.86	1216.65	11	0.6	406.557	36.96	2590000	1	22487	200716_dc_IP79_NormalLung-W6Ab_DDA-OTOT-HCD_25cmPepMap2uTT_145m_01.raw	1	1	P05783|K1C18_HUMAN	Oxidation (M)	M11:Oxidation (M):1000.00		0
TAHYGSLPQK	39.86	1100.56	10	-2.6	551.287	31.6	12600000	1	18699	200716_dc_IP79_NormalLung-W6Ab_DDA-OTOT-HCD_25cmPepMap2uTT_145m_01.raw	2	2	P02686|MBP_HUMAN				0
VPPFTFHVKKI	39.84	1311.77	11	-1.1	438.264	55.05	5510000	1	35367	200716_dc_IP79_NormalLung-W6Ab_DDA-OTOT-HCD_25cmPepMap2uTT_145m_01.raw	1	1	Q6NZI2|CAVN1_HUMAN				0
YPFKPPKVAF	39.82	1192.66	10	0.5	597.34	66.61	41500000	1	43567	200716_dc_IP79_NormalLung-W6Ab_DDA-OTOT-HCD_25cmPepMap2uTT_145m_01.raw	2	2	P61077|UB2D3_HUMAN:P62837|UB2D2_HUMAN:Q9Y2X8|UB2D4_HUMAN				1
HVNPVQALSEFK	39.8	1367.72	12	-0.4	684.867	64.11	0	1	41745	200716_dc_IP79_NormalLung-W6Ab_DDA-OTOT-HCD_25cmPepMap2uTT_145m_01.raw	0	0	P35221|CTNA1_HUMAN				0
KPKKVAGAATPK	39.79	1194.74	12	-0.5	399.255	16.54	4060000	1	7798	200716_dc_IP79_NormalLung-W6Ab_DDA-OTOT-HCD_25cmPepMap2uTT_145m_01.raw	2	2	P16402|H13_HUMAN				0
KIKELHQQY	39.79	1185.65	9	-1.7	593.832	28.9	94700000	1	16696	200716_dc_IP79_NormalLung-W6Ab_DDA-OTOT-HCD_25cmPepMap2uTT_145m_01.raw	2	2	O60341|KDM1A_HUMAN				1
STDHPKYSDM(+15.99)	39.79	1195.48	10	-2.3	598.747	26.84	10500000	1	15244	200716_dc_IP79_NormalLung-W6Ab_DDA-OTOT-HCD_25cmPepMap2uTT_145m_01.raw	2	2	P07305|H10_HUMAN	Oxidation (M)	M10:Oxidation (M):1000.00		0
C(+119.00)FREIDELIKK	39.77	1511.75	11	-0.5	504.923	53.87	2130000	1	34549	200716_dc_IP79_NormalLung-W6Ab_DDA-OTOT-HCD_25cmPepMap2uTT_145m_01.raw	1	1	Q9Y3A5|SBDS_HUMAN	Cysteinylation	C1:Cysteinylation:1000.00		0
TFNLEKQNHTP	39.77	1327.65	11	-1.4	664.832	40.63	13100000	1	25370	200716_dc_IP79_NormalLung-W6Ab_DDA-OTOT-HCD_25cmPepMap2uTT_145m_01.raw	1	1	Q15233|NONO_HUMAN				1
RPKSAFKVQ	39.77	1059.62	9	-0.7	354.213	26.88	18000000	1	15275	200716_dc_IP79_NormalLung-W6Ab_DDA-OTOT-HCD_25cmPepMap2uTT_145m_01.raw	1	1	Q9Y5V3|MAGD1_HUMAN				0
SETGAGKHVP	39.77	981.488	10	-1	491.751	26.05	68400000	1	14655	200716_dc_IP79_NormalLung-W6Ab_DDA-OTOT-HCD_25cmPepMap2uTT_145m_01.raw	1	1	P68363|TBA1B_HUMAN:Q71U36|TBA1A_HUMAN:Q9BQE3|TBA1C_HUMAN:P0DPH8|TBA3D_HUMAN:P0DPH7|TBA3C_HUMAN:Q6PEY2|TBA3E_HUMAN				0
SGKKLEDGPKF	39.74	1204.65	11	-0.6	402.555	32.13	2690000	1	19022	200716_dc_IP79_NormalLung-W6Ab_DDA-OTOT-HCD_25cmPepMap2uTT_145m_01.raw	1	1	P68104|EF1A1_HUMAN:Q5VTE0|EF1A3_HUMAN				0
TKKEIKKVATPK	39.74	1369.87	12	-0.8	457.629	24.72	6150000	1	13617	200716_dc_IP79_NormalLung-W6Ab_DDA-OTOT-HCD_25cmPepMap2uTT_145m_01.raw	1	1	P07305|H10_HUMAN				0
THQAAIVSK	39.74	953.529	9	-1.8	477.771	25.81	2250000	1	14490	200716_dc_IP79_NormalLung-W6Ab_DDA-OTOT-HCD_25cmPepMap2uTT_145m_01.raw	1	1	Q05682|CALD1_HUMAN				0
PEPVKSAPVPK	39.73	1147.66	11	-1.7	383.56	31.99	3890000	1	18916	200716_dc_IP79_NormalLung-W6Ab_DDA-OTOT-HCD_25cmPepMap2uTT_145m_01.raw	1	1	Q99879|H2B1M_HUMAN				1
FVNVVPTFGKK	39.73	1234.71	11	-0.4	412.576	58.41	1480000	1	37778	200716_dc_IP79_NormalLung-W6Ab_DDA-OTOT-HCD_25cmPepMap2uTT_145m_01.raw	1	1	P62861|RS30_HUMAN				1
YVTTSTRTY	39.73	1090.53	9	-1.7	1091.53	38.46	8640000000	1	23456	200716_dc_IP79_NormalLung-W6Ab_DDA-OTOT-HCD_25cmPepMap2uTT_145m_01.raw	2	2	P08670|VIME_HUMAN				1
VFLPQAIRHLK	39.72	1320.8	11	-1	441.274	52.88	7390000	1	33791	200716_dc_IP79_NormalLung-W6Ab_DDA-OTOT-HCD_25cmPepMap2uTT_145m_01.raw	1	1	Q9H6E5|STPAP_HUMAN				1
RPPLEEKKAL	39.72	1179.7	10	-0.9	394.239	30.16	0	1	17620	200716_dc_IP79_NormalLung-W6Ab_DDA-OTOT-HCD_25cmPepMap2uTT_145m_01.raw	0	0	Q9HB19|PKHA2_HUMAN				1
KEQTFYHVA	39.7	1121.55	9	-1.1	561.782	39.37	3730000	1	24139	200716_dc_IP79_NormalLung-W6Ab_DDA-OTOT-HCD_25cmPepMap2uTT_145m_01.raw	1	1	Q6PKC3|TXD11_HUMAN				1
SGYYKVLGK	39.7	1013.55	9	-1.6	507.784	40.59	68000000	1	24947	200716_dc_IP79_NormalLung-W6Ab_DDA-OTOT-HCD_25cmPepMap2uTT_145m_01.raw	1	1	P46776|RL27A_HUMAN				0
RLVTTGVLKQTKG	39.69	1399.85	13	-1.6	467.624	35.73	2500000	1	21607	200716_dc_IP79_NormalLung-W6Ab_DDA-OTOT-HCD_25cmPepMap2uTT_145m_01.raw	1	1	P07305|H10_HUMAN				0
KKPAAATVTKK	39.68	1141.72	11	-0.8	381.58	13.74	1420000	1	5905	200716_dc_IP79_NormalLung-W6Ab_DDA-OTOT-HCD_25cmPepMap2uTT_145m_01.raw	2	2	P16403|H12_HUMAN				0
TGASGSFKLN	39.68	980.493	10	-0.5	491.253	44.22	1630000000	1	27497	200716_dc_IP79_NormalLung-W6Ab_DDA-OTOT-HCD_25cmPepMap2uTT_145m_01.raw	2	2	P16403|H12_HUMAN:P10412|H14_HUMAN:P16402|H13_HUMAN:P16401|H15_HUMAN:Q02539|H11_HUMAN				0
KTKRSIQFV	39.67	1105.66	9	-0.7	553.837	31.94	16200000	1	18834	200716_dc_IP79_NormalLung-W6Ab_DDA-OTOT-HCD_25cmPepMap2uTT_145m_01.raw	1	1	P68363|TBA1B_HUMAN:P68366|TBA4A_HUMAN				1
MPKVSGPDLDL	39.67	1170.6	11	-1.3	586.304	70.71	10900000	1	46329	200716_dc_IP79_NormalLung-W6Ab_DDA-OTOT-HCD_25cmPepMap2uTT_145m_01.raw	1	1	Q09666|AHNK_HUMAN				0
ASGEAKPKVK	39.65	1013.59	10	-1	507.8	14.84	814000	1	6668	200716_dc_IP79_NormalLung-W6Ab_DDA-OTOT-HCD_25cmPepMap2uTT_145m_01.raw	1	1	P16403|H12_HUMAN				0
SVKIKKNKDNVK	39.64	1399.85	12	-0.7	350.97	15.76	6130000	1	7281	200716_dc_IP79_NormalLung-W6Ab_DDA-OTOT-HCD_25cmPepMap2uTT_145m_01.raw	3	3	P63173|RL38_HUMAN				1
KATGAATPK	39.63	843.481	9	-1.6	844.487	13.88	24500000	1	6008	200716_dc_IP79_NormalLung-W6Ab_DDA-OTOT-HCD_25cmPepMap2uTT_145m_01.raw	2	2	P10412|H14_HUMAN				1
GTKYIFMVK	39.63	1085.59	9	-0.9	543.804	52.88	8280000	1	33822	200716_dc_IP79_NormalLung-W6Ab_DDA-OTOT-HCD_25cmPepMap2uTT_145m_01.raw	2	2	O15344|TRI18_HUMAN				0
TNVKAAWGK	39.62	973.534	9	-1.1	487.774	31.3	13800000	1	18440	200716_dc_IP79_NormalLung-W6Ab_DDA-OTOT-HCD_25cmPepMap2uTT_145m_01.raw	1	1	P69905|HBA_HUMAN				0
TFGKKKGP	39.62	861.507	8	-1.6	431.76	16.59	26200000	1	7780	200716_dc_IP79_NormalLung-W6Ab_DDA-OTOT-HCD_25cmPepMap2uTT_145m_01.raw	1	1	P62861|RS30_HUMAN				0
LIEEQKIVVK	39.62	1197.73	10	-0.5	599.874	44.18	27400000	1	27578	200716_dc_IP79_NormalLung-W6Ab_DDA-OTOT-HCD_25cmPepMap2uTT_145m_01.raw	2	2	P49207|RL34_HUMAN				0
APNNGQNKSL	39.61	1041.52	10	-4.6	521.765	26.45	38800000	1	15345	200716_dc_IP79_NormalLung-W6Ab_DDA-OTOT-HCD_25cmPepMap2uTT_145m_01.raw	2	2	Q9UKL0|RCOR1_HUMAN				1
GKLPKQPVIVK	39.61	1205.79	11	0.5	402.936	35.19	3930000	1	21177	200716_dc_IP79_NormalLung-W6Ab_DDA-OTOT-HCD_25cmPepMap2uTT_145m_01.raw	1	1	P46776|RL27A_HUMAN				0
RVTPFILKKLDSI	39.61	1528.93	13	-0.9	510.651	68.44	2460000	1	44787	200716_dc_IP79_NormalLung-W6Ab_DDA-OTOT-HCD_25cmPepMap2uTT_145m_01.raw	1	1	Q8N4H5|TOM5_HUMAN				1
TKENLEKTRHT	39.6	1355.72	11	-0.5	452.912	19.46	90200000	1	9979	200716_dc_IP79_NormalLung-W6Ab_DDA-OTOT-HCD_25cmPepMap2uTT_145m_01.raw	2	2	Q6NZI2|CAVN1_HUMAN				0
SLADAINTEFKNT	39.58	1422.7	13	-1	712.356	77.22	1030000	1	50838	200716_dc_IP79_NormalLung-W6Ab_DDA-OTOT-HCD_25cmPepMap2uTT_145m_01.raw	1	1	P08670|VIME_HUMAN				0
TGNKIRYNSK	39.57	1179.64	10	-1.2	394.219	22.75	26900000	1	12575	200716_dc_IP79_NormalLung-W6Ab_DDA-OTOT-HCD_25cmPepMap2uTT_145m_01.raw	1	1	P62891|RL39_HUMAN:Q59GN2|R39L5_HUMAN				0
EEEAAQKNMA	39.56	1119.49	10	-0.6	560.75	28.65	3950000	1	16558	200716_dc_IP79_NormalLung-W6Ab_DDA-OTOT-HCD_25cmPepMap2uTT_145m_01.raw	1	1	P35579|MYH9_HUMAN				1
RPREAEVRFL	39.56	1271.71	10	-0.1	424.911	43.53	104000000	1	27081	200716_dc_IP79_NormalLung-W6Ab_DDA-OTOT-HCD_25cmPepMap2uTT_145m_01.raw	2	2	Q13438|OS9_HUMAN				1
SPKGNRPAILTY	39.56	1315.72	12	-0.8	658.869	46.09	17500000	1	28952	200716_dc_IP79_NormalLung-W6Ab_DDA-OTOT-HCD_25cmPepMap2uTT_145m_01.raw	2	2	Q9ULP0|NDRG4_HUMAN				0
FMGKVVNPTQK	39.56	1247.67	11	-0.1	416.897	40.63	7400000	1	25008	200716_dc_IP79_NormalLung-W6Ab_DDA-OTOT-HCD_25cmPepMap2uTT_145m_01.raw	1	1	P01009|A1AT_HUMAN				0
TSGGAGGLGSLR	39.54	1031.54	12	-0.5	516.775	42.69	15100000	1	26483	200716_dc_IP79_NormalLung-W6Ab_DDA-OTOT-HCD_25cmPepMap2uTT_145m_01.raw	1	1	P17661|DESM_HUMAN				0
NFGIGQDIQPK	39.54	1215.62	11	-0.2	608.819	59	9930000	1	38073	200716_dc_IP79_NormalLung-W6Ab_DDA-OTOT-HCD_25cmPepMap2uTT_145m_01.raw	1	1	P62424|RL7A_HUMAN				1
HFKNTRETAQAIK	39.53	1542.83	13	0	386.714	27.22	24100000	1	15548	200716_dc_IP79_NormalLung-W6Ab_DDA-OTOT-HCD_25cmPepMap2uTT_145m_01.raw	1	1	P18621|RL17_HUMAN				0
RVITEEEKNFKA	39.52	1462.78	12	-2	488.599	37.75	12800000	1	22978	200716_dc_IP79_NormalLung-W6Ab_DDA-OTOT-HCD_25cmPepMap2uTT_145m_01.raw	1	1	P26373|RL13_HUMAN				1
TAKSVPADLSRPK	39.51	1368.77	13	-0.3	457.265	31.01	2570000	1	18262	200716_dc_IP79_NormalLung-W6Ab_DDA-OTOT-HCD_25cmPepMap2uTT_145m_01.raw	1	1	P27816|MAP4_HUMAN				0
KISSGKSSPFK	39.48	1164.65	11	-0.7	389.224	26.93	3980000	1	15323	200716_dc_IP79_NormalLung-W6Ab_DDA-OTOT-HCD_25cmPepMap2uTT_145m_01.raw	1	1	O95810|CAVN2_HUMAN				1
KYKEETIEKM(+15.99)	39.48	1313.65	10	-0.7	438.892	27.23	9330000	1	15522	200716_dc_IP79_NormalLung-W6Ab_DDA-OTOT-HCD_25cmPepMap2uTT_145m_01.raw	1	1	P61254|RL26_HUMAN	Oxidation (M)	M10:Oxidation (M):1000.00		0
STRNFVIHR	39.48	1128.62	9	-2.2	377.212	31.3	12000000	1	18420	200716_dc_IP79_NormalLung-W6Ab_DDA-OTOT-HCD_25cmPepMap2uTT_145m_01.raw	1	1	Q92974|ARHG2_HUMAN				0
TLPTKETIEQEKR	39.48	1571.85	13	-1	524.957	36.42	36100000	1	22192	200716_dc_IP79_NormalLung-W6Ab_DDA-OTOT-HCD_25cmPepMap2uTT_145m_01.raw	1	1	P63313|TYB10_HUMAN				1
SLTSNHQKISSGK	39.48	1385.73	13	-1.7	462.915	26	3890000	1	14644	200716_dc_IP79_NormalLung-W6Ab_DDA-OTOT-HCD_25cmPepMap2uTT_145m_01.raw	1	1	O95810|CAVN2_HUMAN				0
TSYN(+.98)RGDSTFESK	39.47	1491.65	13	-0.9	746.83	42.4	1660000	1	26392	200716_dc_IP79_NormalLung-W6Ab_DDA-OTOT-HCD_25cmPepMap2uTT_145m_01.raw	1	1	P02671|FIBA_HUMAN	Deamidation (NQ)	N4:Deamidation (NQ):1000.00		0
RVLLGETGKEKLP	39.47	1438.85	13	-1	480.624	45.01	12300000	1	27973	200716_dc_IP79_NormalLung-W6Ab_DDA-OTOT-HCD_25cmPepMap2uTT_145m_01.raw	1	1	P62280|RS11_HUMAN				0
NPKFAEHGETL	39.46	1241.6	11	-1	621.809	41.03	1120000	1	25386	200716_dc_IP79_NormalLung-W6Ab_DDA-OTOT-HCD_25cmPepMap2uTT_145m_01.raw	1	1	Q6N069|NAA16_HUMAN:Q9BXJ9|NAA15_HUMAN				0
VPKTAENFRQF	39.46	1335.69	11	0.3	446.239	47.42	4570000	1	29870	200716_dc_IP79_NormalLung-W6Ab_DDA-OTOT-HCD_25cmPepMap2uTT_145m_01.raw	1	1	O43447|PPIH_HUMAN				1
APEEHPVLL	39.46	1003.53	9	0.2	502.774	54.95	43900000	1	35133	200716_dc_IP79_NormalLung-W6Ab_DDA-OTOT-HCD_25cmPepMap2uTT_145m_01.raw	1	1	P60709|ACTB_HUMAN:P63261|ACTG_HUMAN:A5A3E0|POTEF_HUMAN				1
AENDVLHC(+119.00)VAF	39.45	1335.56	11	0.2	668.787	70.47	1090000	1	46275	200716_dc_IP79_NormalLung-W6Ab_DDA-OTOT-HCD_25cmPepMap2uTT_145m_01.raw	1	1	P01023|A2MG_HUMAN	Cysteinylation	C8:Cysteinylation:1000.00		0
TVTPSPVKGKGK	39.44	1197.71	12	-0.7	400.243	25.48	0	1	14222	200716_dc_IP79_NormalLung-W6Ab_DDA-OTOT-HCD_25cmPepMap2uTT_145m_01.raw	0	0	Q9H1E3|NUCKS_HUMAN				0
SPVTPKFTPVASK	39.44	1357.76	13	-0.7	453.594	44.91	1430000	1	28156	200716_dc_IP79_NormalLung-W6Ab_DDA-OTOT-HCD_25cmPepMap2uTT_145m_01.raw	1	1	Q15942|ZYX_HUMAN				1
EEYQRIYTT	39.44	1201.56	9	-0.6	601.788	48.7	4670000	1	30797	200716_dc_IP79_NormalLung-W6Ab_DDA-OTOT-HCD_25cmPepMap2uTT_145m_01.raw	1	1	Q09666|AHNK_HUMAN				1
SLIVGLKISTK	39.42	1157.74	11	-1.2	579.876	59.15	4060000	1	38186	200716_dc_IP79_NormalLung-W6Ab_DDA-OTOT-HCD_25cmPepMap2uTT_145m_01.raw	1	1	P21980|TGM2_HUMAN				0
RGDSPASSKP	39.42	1000.49	10	-1.7	1001.5	24.97	1960000000	1	13884	200716_dc_IP79_NormalLung-W6Ab_DDA-OTOT-HCD_25cmPepMap2uTT_145m_01.raw	2	2	P02751|FINC_HUMAN				0
RPQPHIFHF	39.42	1177.61	9	-1.2	393.545	47.86	5650000	1	30244	200716_dc_IP79_NormalLung-W6Ab_DDA-OTOT-HCD_25cmPepMap2uTT_145m_01.raw	1	1	Q8WYP3|RIN2_HUMAN				0
KPPPQKSLKEL	39.41	1263.76	11	-1.8	632.884	29.44	302000000	1	17051	200716_dc_IP79_NormalLung-W6Ab_DDA-OTOT-HCD_25cmPepMap2uTT_145m_01.raw	2	2	P52566|GDIR2_HUMAN				0
SYKVSTSGP	39.39	924.455	9	-1.4	463.234	36.52	4290000	1	22129	200716_dc_IP79_NormalLung-W6Ab_DDA-OTOT-HCD_25cmPepMap2uTT_145m_01.raw	1	1	P05787|K2C8_HUMAN				0
KVKTPQPKKAAK	39.35	1322.84	12	-1	441.953	15.42	7230000	1	7098	200716_dc_IP79_NormalLung-W6Ab_DDA-OTOT-HCD_25cmPepMap2uTT_145m_01.raw	1	1	P16402|H13_HUMAN				1
HVSHGHGRIGK	39.35	1183.63	11	-4.2	395.55	14.46	10900000	1	6257	200716_dc_IP79_NormalLung-W6Ab_DDA-OTOT-HCD_25cmPepMap2uTT_145m_01.raw	2	2	P46776|RL27A_HUMAN				1
SVQRTQAPAVATT	39.35	1328.7	13	-0.5	665.359	37.16	4400000	1	22580	200716_dc_IP79_NormalLung-W6Ab_DDA-OTOT-HCD_25cmPepMap2uTT_145m_01.raw	1	1	P15880|RS2_HUMAN				1
TPKRPSTSQTV	39.34	1200.65	11	-1.4	601.33	28.45	5610000	1	16420	200716_dc_IP79_NormalLung-W6Ab_DDA-OTOT-HCD_25cmPepMap2uTT_145m_01.raw	1	1	P12270|TPR_HUMAN				1
PEPSKSAPAPK	39.31	1107.59	11	-1.1	370.204	26.1	11200000	1	14693	200716_dc_IP79_NormalLung-W6Ab_DDA-OTOT-HCD_25cmPepMap2uTT_145m_01.raw	1	1	Q99877|H2B1N_HUMAN:P33778|H2B1B_HUMAN				0
TFGKKKGPN	39.31	975.55	9	-1.5	488.782	15.61	5000000	1	7235	200716_dc_IP79_NormalLung-W6Ab_DDA-OTOT-HCD_25cmPepMap2uTT_145m_01.raw	1	1	P62861|RS30_HUMAN				0
RVQEENARLK	39.31	1241.68	10	-1.7	414.901	25.95	20600000	1	14598	200716_dc_IP79_NormalLung-W6Ab_DDA-OTOT-HCD_25cmPepMap2uTT_145m_01.raw	1	1	Q5JRA6|TGO1_HUMAN				1
KAFNQGKIFK	39.31	1179.68	10	-0.6	394.233	33.1	77200000	1	19659	200716_dc_IP79_NormalLung-W6Ab_DDA-OTOT-HCD_25cmPepMap2uTT_145m_01.raw	2	2	P26641|EF1G_HUMAN				1
HGGMQGGFGGQS	39.3	1118.46	12	-1.3	560.235	37.45	3450000	1	22742	200716_dc_IP79_NormalLung-W6Ab_DDA-OTOT-HCD_25cmPepMap2uTT_145m_01.raw	1	1	Q15424|SAFB1_HUMAN				0
KFQSFQDHKLK	39.3	1404.75	11	-1	469.257	31.25	3650000	1	18433	200716_dc_IP79_NormalLung-W6Ab_DDA-OTOT-HCD_25cmPepMap2uTT_145m_01.raw	1	1	Q14331|FRG1_HUMAN				0
GQGYLIKDGK	39.29	1077.58	10	-1.5	539.797	34.01	2060000	1	20389	200716_dc_IP79_NormalLung-W6Ab_DDA-OTOT-HCD_25cmPepMap2uTT_145m_01.raw	1	1	P39023|RL3_HUMAN				0
SFKEKFVRK	39.29	1167.68	9	-0.1	390.233	27.86	138000000	1	15934	200716_dc_IP79_NormalLung-W6Ab_DDA-OTOT-HCD_25cmPepMap2uTT_145m_01.raw	2	2	Q9BW72|HIG2A_HUMAN				1
HAVGDIPGVR	39.29	1019.55	10	0	510.783	41.27	7840000	1	25452	200716_dc_IP79_NormalLung-W6Ab_DDA-OTOT-HCD_25cmPepMap2uTT_145m_01.raw	1	1	P62266|RS23_HUMAN				1
RVLFELTGRSK	39.27	1304.76	11	-0.8	435.926	45.45	13300000	1	28460	200716_dc_IP79_NormalLung-W6Ab_DDA-OTOT-HCD_25cmPepMap2uTT_145m_01.raw	1	1	Q9Y6Q5|AP1M2_HUMAN				0
TPVKKKARK	39.27	1054.7	9	-1.4	352.573	10.08	8540000	1	3430	200716_dc_IP79_NormalLung-W6Ab_DDA-OTOT-HCD_25cmPepMap2uTT_145m_01.raw	2	2	P10412|H14_HUMAN				0
VHIGQVIMSIRTK	39.26	1480.85	13	0.4	494.626	56.82	1440000	1	36701	200716_dc_IP79_NormalLung-W6Ab_DDA-OTOT-HCD_25cmPepMap2uTT_145m_01.raw	1	1	P27635|RL10_HUMAN:Q96L21|RL10L_HUMAN				0
SPNYEGPLHSL	39.26	1212.58	11	-0.8	607.295	63.1	11900000	1	40914	200716_dc_IP79_NormalLung-W6Ab_DDA-OTOT-HCD_25cmPepMap2uTT_145m_01.raw	1	1	P15884|ITF2_HUMAN				0
HC(+119.00)TGQVKVY	39.24	1152.51	9	-0.8	577.26	29.89	34800000	1	17411	200716_dc_IP79_NormalLung-W6Ab_DDA-OTOT-HCD_25cmPepMap2uTT_145m_01.raw	2	2	Q99814|EPAS1_HUMAN	Cysteinylation	C2:Cysteinylation:1000.00		0
APSLFHLNTL	39.24	1111.6	10	-0.1	556.808	80.87	61800000	1	53277	200716_dc_IP79_NormalLung-W6Ab_DDA-OTOT-HCD_25cmPepMap2uTT_145m_01.raw	1	1	Q96QB1|RHG07_HUMAN				1
TGGAASKLSK	39.22	918.513	10	-1	460.264	24.99	0	1	13862	200716_dc_IP79_NormalLung-W6Ab_DDA-OTOT-HCD_25cmPepMap2uTT_145m_01.raw	0	0	P42766|RL35_HUMAN				0
APFDREPFTL	39.22	1191.59	10	-0.8	596.803	80.62	60400000	1	53445	200716_dc_IP79_NormalLung-W6Ab_DDA-OTOT-HCD_25cmPepMap2uTT_145m_01.raw	1	1	Q13094|LCP2_HUMAN				1
HGNSGMVRAK	39.21	1055.53	10	-1.1	352.85	16.74	558000	1	8064	200716_dc_IP79_NormalLung-W6Ab_DDA-OTOT-HCD_25cmPepMap2uTT_145m_01.raw	1	1	P18077|RL35A_HUMAN				0
SLQYEYKANSN	39.21	1315.6	11	-0.6	658.809	44.47	4280000	1	27790	200716_dc_IP79_NormalLung-W6Ab_DDA-OTOT-HCD_25cmPepMap2uTT_145m_01.raw	1	1	O75643|U520_HUMAN				0
SN(+.98)HQKISSGK	39.2	1085.55	10	-0.7	543.78	13.2	484000	1	5575	200716_dc_IP79_NormalLung-W6Ab_DDA-OTOT-HCD_25cmPepMap2uTT_145m_01.raw	2	2	O95810|CAVN2_HUMAN	Deamidation (NQ)	N2:Deamidation (NQ):26.31		0
NPNQNKNVAL	39.19	1110.58	10	-1.6	556.295	34.01	19100000	1	20341	200716_dc_IP79_NormalLung-W6Ab_DDA-OTOT-HCD_25cmPepMap2uTT_145m_01.raw	1	1	Q15717|ELAV1_HUMAN				1
TRYSVDIPLDK	39.18	1305.69	11	-0.6	436.238	55.85	76400000	1	35798	200716_dc_IP79_NormalLung-W6Ab_DDA-OTOT-HCD_25cmPepMap2uTT_145m_01.raw	2	2	P61353|RL27_HUMAN				0
IIGNSTLLRIIYK	39.16	1502.92	13	-1.3	501.979	77.36	2540000	1	50921	200716_dc_IP79_NormalLung-W6Ab_DDA-OTOT-HCD_25cmPepMap2uTT_145m_01.raw	1	1	P24530|EDNRB_HUMAN				0
AKAVKPKAAKPK	39.16	1235.81	12	-0.5	412.943	14.07	2090000	1	6119	200716_dc_IP79_NormalLung-W6Ab_DDA-OTOT-HCD_25cmPepMap2uTT_145m_01.raw	2	2	P16403|H12_HUMAN:P10412|H14_HUMAN				0
RSSDLTDRVK	39.15	1175.63	10	-0.3	392.882	28.16	8870000	1	16166	200716_dc_IP79_NormalLung-W6Ab_DDA-OTOT-HCD_25cmPepMap2uTT_145m_01.raw	1	1	P29972|AQP1_HUMAN				0
TAVYKVPPFTFHV	39.13	1504.81	13	-2.1	502.609	78.15	8220000	1	51476	200716_dc_IP79_NormalLung-W6Ab_DDA-OTOT-HCD_25cmPepMap2uTT_145m_01.raw	1	1	Q6NZI2|CAVN1_HUMAN				0
KVKYLPQQQK	39.13	1258.74	10	-2	420.586	28.26	4760000	1	16279	200716_dc_IP79_NormalLung-W6Ab_DDA-OTOT-HCD_25cmPepMap2uTT_145m_01.raw	1	1	Q9UKK3|PARP4_HUMAN				1
SLKQKLVNK	39.13	1056.67	9	-1.3	529.339	26.78	120000000	1	15201	200716_dc_IP79_NormalLung-W6Ab_DDA-OTOT-HCD_25cmPepMap2uTT_145m_01.raw	2	2	Q08AF3|SLFN5_HUMAN				1
TSAPDLKNVRSK	39.13	1314.73	12	-1.5	439.248	30.72	6310000	1	18026	200716_dc_IP79_NormalLung-W6Ab_DDA-OTOT-HCD_25cmPepMap2uTT_145m_01.raw	1	1	P27816|MAP4_HUMAN				0
AAANAIRVY	39.05	947.519	9	-0.9	474.766	47.07	4670000	1	29617	200716_dc_IP79_NormalLung-W6Ab_DDA-OTOT-HCD_25cmPepMap2uTT_145m_01.raw	1	1	Q9NRK6|ABCBA_HUMAN				1
SGDAAIVDMVP	39.04	1073.51	11	-1.3	537.76	86.27	1380000	1	57297	200716_dc_IP79_NormalLung-W6Ab_DDA-OTOT-HCD_25cmPepMap2uTT_145m_01.raw	1	1	P68104|EF1A1_HUMAN:Q5VTE0|EF1A3_HUMAN				0
SDYPPLGR	39.03	903.445	8	-1.8	904.451	45.8	576000000	1	28558	200716_dc_IP79_NormalLung-W6Ab_DDA-OTOT-HCD_25cmPepMap2uTT_145m_01.raw	2	2	P68104|EF1A1_HUMAN:Q5VTE0|EF1A3_HUMAN				1
KTYTKSSHLK	39.03	1191.66	10	-1.6	596.837	15.85	29900000	1	7376	200716_dc_IP79_NormalLung-W6Ab_DDA-OTOT-HCD_25cmPepMap2uTT_145m_01.raw	2	2	Q9Y5W3|KLF2_HUMAN:O43474|KLF4_HUMAN				1
KAKKPAAAGVKK	39.02	1195.78	12	-0.7	399.599	12.39	6200000	1	4916	200716_dc_IP79_NormalLung-W6Ab_DDA-OTOT-HCD_25cmPepMap2uTT_145m_01.raw	2	2	P16401|H15_HUMAN				1
KSRVSPPFKQA	39.01	1243.7	11	-0.3	622.859	29.93	98400000	1	17442	200716_dc_IP79_NormalLung-W6Ab_DDA-OTOT-HCD_25cmPepMap2uTT_145m_01.raw	2	2	Q8TCU6|PREX1_HUMAN				0
KAKPVKASKPK	39	1180.77	11	-2	394.595	11.72	1650000	1	4492	200716_dc_IP79_NormalLung-W6Ab_DDA-OTOT-HCD_25cmPepMap2uTT_145m_01.raw	2	2	P07305|H10_HUMAN				0
YDVEKNNSR	39	1123.53	9	-0.9	562.77	26.88	27800000	1	15270	200716_dc_IP79_NormalLung-W6Ab_DDA-OTOT-HCD_25cmPepMap2uTT_145m_01.raw	2	2	P16403|H12_HUMAN:P10412|H14_HUMAN:P16402|H13_HUMAN:P16401|H15_HUMAN:Q02539|H11_HUMAN:P22492|H1T_HUMAN				0
MPKFSMPGF	39	1040.48	9	-0.7	521.248	83.2	84200000	1	55195	200716_dc_IP79_NormalLung-W6Ab_DDA-OTOT-HCD_25cmPepMap2uTT_145m_01.raw	1	1	Q09666|AHNK_HUMAN				1
M(+15.99)FGGPGTASRPS	38.99	1179.53	12	0.1	590.774	38.45	0	1	23532	200716_dc_IP79_NormalLung-W6Ab_DDA-OTOT-HCD_25cmPepMap2uTT_145m_01.raw	0	0	P08670|VIME_HUMAN	Oxidation (M)	M1:Oxidation (M):1000.00		0
KAKEPPFVRK	38.98	1198.72	10	-2.1	400.579	26.1	21700000	1	14688	200716_dc_IP79_NormalLung-W6Ab_DDA-OTOT-HCD_25cmPepMap2uTT_145m_01.raw	1	1	Q9UPT8|ZC3H4_HUMAN				1
RPKTHVTHH	38.97	1111.6	9	-1.1	371.54	12.39	5760000	1	4967	200716_dc_IP79_NormalLung-W6Ab_DDA-OTOT-HCD_25cmPepMap2uTT_145m_01.raw	2	2	Q95604|1C17_HUMAN				0
HRDGPALSGPQSR	38.95	1376.69	13	-1.2	459.904	28.4	2420000	1	16428	200716_dc_IP79_NormalLung-W6Ab_DDA-OTOT-HCD_25cmPepMap2uTT_145m_01.raw	1	1	P19971|TYPH_HUMAN				0
RPDVAKRLSL	38.95	1153.69	10	-1	385.571	42.01	5650000	1	26040	200716_dc_IP79_NormalLung-W6Ab_DDA-OTOT-HCD_25cmPepMap2uTT_145m_01.raw	1	1	O75815|BCAR3_HUMAN				1
FDYKGEVEK	38.94	1113.53	9	-0.4	557.774	40.19	9560000	1	24750	200716_dc_IP79_NormalLung-W6Ab_DDA-OTOT-HCD_25cmPepMap2uTT_145m_01.raw	2	2	P14317|HCLS1_HUMAN				0
Q(-17.03)EQIEAIHKA	38.94	1148.58	10	-0.9	575.298	48.6	8510000	1	30724	200716_dc_IP79_NormalLung-W6Ab_DDA-OTOT-HCD_25cmPepMap2uTT_145m_01.raw	1	1	Q15459|SF3A1_HUMAN	Pyro-glu from Q	Q1:Pyro-glu from Q:1000.00		0
KEM(+15.99)ESGPKA	38.94	991.464	9	-0.3	496.739	16.97	11400000	1	8335	200716_dc_IP79_NormalLung-W6Ab_DDA-OTOT-HCD_25cmPepMap2uTT_145m_01.raw	1	1	P14317|HCLS1_HUMAN	Oxidation (M)	M3:Oxidation (M):1000.00		0
SQKNFKAKNK	38.93	1191.67	10	0.5	596.844	11.48	402000	1	4358	200716_dc_IP79_NormalLung-W6Ab_DDA-OTOT-HCD_25cmPepMap2uTT_145m_01.raw	1	1	Q8N0T1|RBIS_HUMAN				0
RVKTNLPIFK	38.93	1214.75	10	-2	405.923	44.08	18600000	1	27477	200716_dc_IP79_NormalLung-W6Ab_DDA-OTOT-HCD_25cmPepMap2uTT_145m_01.raw	1	1	O60493|SNX3_HUMAN				1
VPYKKDVGKTL	38.93	1246.73	11	-1.4	416.583	32.91	1270000	1	19604	200716_dc_IP79_NormalLung-W6Ab_DDA-OTOT-HCD_25cmPepMap2uTT_145m_01.raw	1	1	Q9H2P0|ADNP_HUMAN				0
APAKHLIASM(+15.99)L	38.93	1166.65	11	-0.9	584.331	42.89	5300000	1	26665	200716_dc_IP79_NormalLung-W6Ab_DDA-OTOT-HCD_25cmPepMap2uTT_145m_01.raw	1	1	Q9NYY3|PLK2_HUMAN	Oxidation (M)	M10:Oxidation (M):1000.00		0
GTGASGSFK	38.92	810.387	9	-0.6	811.394	27.13	96400000	1	15443	200716_dc_IP79_NormalLung-W6Ab_DDA-OTOT-HCD_25cmPepMap2uTT_145m_01.raw	2	2	P16403|H12_HUMAN:P10412|H14_HUMAN:P16402|H13_HUMAN:P16401|H15_HUMAN:Q02539|H11_HUMAN:P22492|H1T_HUMAN				1
IARPTPPQA	38.9	949.534	9	-1.4	475.774	39.85	34600000	1	24523	200716_dc_IP79_NormalLung-W6Ab_DDA-OTOT-HCD_25cmPepMap2uTT_145m_01.raw	1	1	P46379|BAG6_HUMAN				1
RVKTNVPVKLF	38.89	1299.8	11	-0.8	434.274	50.12	2620000	1	31863	200716_dc_IP79_NormalLung-W6Ab_DDA-OTOT-HCD_25cmPepMap2uTT_145m_01.raw	1	1	Q9UKM9|RALY_HUMAN				0
FDTASTGKTFP	38.89	1170.56	11	-0.3	586.285	54.95	99800000	1	34955	200716_dc_IP79_NormalLung-W6Ab_DDA-OTOT-HCD_25cmPepMap2uTT_145m_01.raw	1	1	P02671|FIBA_HUMAN				1
RGKSGFNSK	38.86	979.52	9	-0.7	980.527	13.01	47800000	1	5398	200716_dc_IP79_NormalLung-W6Ab_DDA-OTOT-HCD_25cmPepMap2uTT_145m_01.raw	2	2	P07910|HNRPC_HUMAN:B2RXH8|HNRC2_HUMAN:O60812|HNRC1_HUMAN:P0DMR1|HNRC4_HUMAN:B7ZW38|HNRC3_HUMAN				0
RYFSIIDSKVK	38.86	1354.76	11	-0.9	452.594	49.93	1800000	1	31712	200716_dc_IP79_NormalLung-W6Ab_DDA-OTOT-HCD_25cmPepMap2uTT_145m_01.raw	1	1	Q9BVA6|FICD_HUMAN				1
RPFGSISRIYL	38.84	1307.73	11	-0.3	436.919	67.4	6710000	1	44070	200716_dc_IP79_NormalLung-W6Ab_DDA-OTOT-HCD_25cmPepMap2uTT_145m_01.raw	2	2	O75821|EIF3G_HUMAN				1
QPRKLGRQM(+15.99)	38.84	1128.62	9	0	377.213	20.85	45800000	1	11058	200716_dc_IP79_NormalLung-W6Ab_DDA-OTOT-HCD_25cmPepMap2uTT_145m_01.raw	1	1	Q9P266|JCAD_HUMAN	Oxidation (M)	M9:Oxidation (M):1000.00		0
RAYPHVFTK	38.83	1117.6	9	-1.8	373.541	33.86	19900000	1	20204	200716_dc_IP79_NormalLung-W6Ab_DDA-OTOT-HCD_25cmPepMap2uTT_145m_01.raw	1	1	O14949|QCR8_HUMAN				1
REKEFKAKEAA	38.79	1305.7	11	-1.1	436.241	25.02	33300000	1	13894	200716_dc_IP79_NormalLung-W6Ab_DDA-OTOT-HCD_25cmPepMap2uTT_145m_01.raw	1	1	O75348|VATG1_HUMAN				1
SSYSKQFTS	38.77	1033.47	9	-0.5	517.743	37.05	3690000	1	22504	200716_dc_IP79_NormalLung-W6Ab_DDA-OTOT-HCD_25cmPepMap2uTT_145m_01.raw	1	1	P02671|FIBA_HUMAN				0
HEENLKTKKQ	38.76	1253.67	10	-1	418.898	13.01	318000	1	5443	200716_dc_IP79_NormalLung-W6Ab_DDA-OTOT-HCD_25cmPepMap2uTT_145m_01.raw	1	1	P42766|RL35_HUMAN				0
APYSTHFQL	38.73	1062.51	9	-0.4	532.264	64.03	6800000	1	41662	200716_dc_IP79_NormalLung-W6Ab_DDA-OTOT-HCD_25cmPepMap2uTT_145m_01.raw	1	1	Q8NFJ5|RAI3_HUMAN				0
TTSKFGHGR	38.72	989.504	9	0	495.759	17.07	2480000	1	8249	200716_dc_IP79_NormalLung-W6Ab_DDA-OTOT-HCD_25cmPepMap2uTT_145m_01.raw	1	1	P39023|RL3_HUMAN:Q92901|RL3L_HUMAN				0
PEPTKSAPAPK	38.72	1121.61	11	-1.7	374.876	26.45	10500000	1	14975	200716_dc_IP79_NormalLung-W6Ab_DDA-OTOT-HCD_25cmPepMap2uTT_145m_01.raw	1	1	P58876|H2B1D_HUMAN				1
NKVSEEHDVLR	38.71	1324.67	11	-1.1	442.565	29.68	2120000	1	17313	200716_dc_IP79_NormalLung-W6Ab_DDA-OTOT-HCD_25cmPepMap2uTT_145m_01.raw	1	1	P14317|HCLS1_HUMAN				0
HKKSHEESHKE	38.7	1374.66	11	-0.4	459.228	8.7	1520000	1	2624	200716_dc_IP79_NormalLung-W6Ab_DDA-OTOT-HCD_25cmPepMap2uTT_145m_01.raw	1	1	P05109|S10A8_HUMAN				0
AEAIHSPQV	38.7	950.482	9	-1.1	476.248	42.01	68000000	1	26197	200716_dc_IP79_NormalLung-W6Ab_DDA-OTOT-HCD_25cmPepMap2uTT_145m_01.raw	1	1	P12270|TPR_HUMAN				1
NEHDYAKAA	38.69	1017.45	9	-2.1	509.732	26.64	5090000	1	15103	200716_dc_IP79_NormalLung-W6Ab_DDA-OTOT-HCD_25cmPepMap2uTT_145m_01.raw	1	1	Q15006|EMC2_HUMAN				1
YGQGAGTLSTDK	38.68	1196.57	12	-0.1	599.291	36.81	2360000	1	22358	200716_dc_IP79_NormalLung-W6Ab_DDA-OTOT-HCD_25cmPepMap2uTT_145m_01.raw	1	1	P21291|CSRP1_HUMAN				0
MPSLKHIVEL	38.68	1165.65	10	-0.8	583.833	67.01	2750000	1	43788	200716_dc_IP79_NormalLung-W6Ab_DDA-OTOT-HCD_25cmPepMap2uTT_145m_01.raw	1	1	O60518|RNBP6_HUMAN				1
VTNPDIAAKKK	38.67	1183.69	11	-0.4	395.571	26.1	12700000	1	14712	200716_dc_IP79_NormalLung-W6Ab_DDA-OTOT-HCD_25cmPepMap2uTT_145m_01.raw	1	1	O75691|UTP20_HUMAN				1
TFIKVPQNQNGK	38.67	1372.75	12	-1.7	458.589	41.12	1900000	1	25481	200716_dc_IP79_NormalLung-W6Ab_DDA-OTOT-HCD_25cmPepMap2uTT_145m_01.raw	1	1	P19338|NUCL_HUMAN				0
KAKSPSQKKPVSK	38.66	1411.85	13	-1	471.624	12.16	947000	1	4819	200716_dc_IP79_NormalLung-W6Ab_DDA-OTOT-HCD_25cmPepMap2uTT_145m_01.raw	2	2	O75367|H2AY_HUMAN				0
RPPGFSPFR	38.66	1059.56	9	0.6	354.195	48.6	1380000000	1	30895	200716_dc_IP79_NormalLung-W6Ab_DDA-OTOT-HCD_25cmPepMap2uTT_145m_01.raw	2	2	P01042|KNG1_HUMAN				1
SVYHISGKKK	38.66	1145.66	10	0.5	382.893	21.12	14000000	1	11281	200716_dc_IP79_NormalLung-W6Ab_DDA-OTOT-HCD_25cmPepMap2uTT_145m_01.raw	2	2	Q9NTJ3|SMC4_HUMAN				0
APGPAKARVAL	38.66	1049.63	11	0	525.824	37.05	25000000	1	22415	200716_dc_IP79_NormalLung-W6Ab_DDA-OTOT-HCD_25cmPepMap2uTT_145m_01.raw	2	2	O00501|CLD5_HUMAN				0
KVKLAVLKYYK	38.65	1351.86	11	-0.7	451.627	42.6	3560000	1	26450	200716_dc_IP79_NormalLung-W6Ab_DDA-OTOT-HCD_25cmPepMap2uTT_145m_01.raw	1	1	P62979|RS27A_HUMAN				1
YYKVDENGK	38.65	1114.53	9	-1	558.271	30.27	11100000	1	17714	200716_dc_IP79_NormalLung-W6Ab_DDA-OTOT-HCD_25cmPepMap2uTT_145m_01.raw	2	2	P62979|RS27A_HUMAN				0
YPKRPLLGL	38.65	1055.65	9	-0.7	528.831	54.95	75600000	1	35184	200716_dc_IP79_NormalLung-W6Ab_DDA-OTOT-HCD_25cmPepMap2uTT_145m_01.raw	2	2	Q9GZR7|DDX24_HUMAN				1
KPFSQHVRKL	38.64	1238.72	10	-1.2	413.915	27.86	33700000	1	15926	200716_dc_IP79_NormalLung-W6Ab_DDA-OTOT-HCD_25cmPepMap2uTT_145m_01.raw	1	1	Q02878|RL6_HUMAN				0
ALTNGIYPHKLVF	38.64	1471.82	13	-1.7	736.915	69.92	7680000	1	45888	200716_dc_IP79_NormalLung-W6Ab_DDA-OTOT-HCD_25cmPepMap2uTT_145m_01.raw	2	2	Q02878|RL6_HUMAN				1
TFNLEKQNHTPR	38.64	1483.75	12	-1	495.591	33.61	17800000	1	20004	200716_dc_IP79_NormalLung-W6Ab_DDA-OTOT-HCD_25cmPepMap2uTT_145m_01.raw	1	1	Q15233|NONO_HUMAN				1
LPHYQKLKKF	38.64	1300.77	10	-2.4	434.595	36.07	2820000	1	21816	200716_dc_IP79_NormalLung-W6Ab_DDA-OTOT-HCD_25cmPepMap2uTT_145m_01.raw	1	1	P43243|MATR3_HUMAN				0
TETQEKNPLPSK	38.64	1370.7	12	-2	457.908	31.45	4620000	1	18536	200716_dc_IP79_NormalLung-W6Ab_DDA-OTOT-HCD_25cmPepMap2uTT_145m_01.raw	1	1	P62328|TYB4_HUMAN				1
RPKHKEVHL	38.63	1142.67	9	-0.9	381.896	24.72	31100000	1	13703	200716_dc_IP79_NormalLung-W6Ab_DDA-OTOT-HCD_25cmPepMap2uTT_145m_01.raw	1	1	Q53EP0|FND3B_HUMAN				1
TYSTEPNNLK	38.62	1165.56	10	-1.4	583.787	37.5	29100000	1	22790	200716_dc_IP79_NormalLung-W6Ab_DDA-OTOT-HCD_25cmPepMap2uTT_145m_01.raw	1	1	P46779|RL28_HUMAN				0
KAFSKEKM(+15.99)EK	38.62	1240.65	10	-0.6	621.331	13.88	9730000	1	5993	200716_dc_IP79_NormalLung-W6Ab_DDA-OTOT-HCD_25cmPepMap2uTT_145m_01.raw	2	2	Q6NZI2|CAVN1_HUMAN	Oxidation (M)	M8:Oxidation (M):1000.00		0
MPKVSGPDL	38.61	942.484	9	-0.4	472.249	54.36	11500000	1	34756	200716_dc_IP79_NormalLung-W6Ab_DDA-OTOT-HCD_25cmPepMap2uTT_145m_01.raw	1	1	Q09666|AHNK_HUMAN				1
QEQIEAIHKA	38.59	1165.61	10	-1.3	583.811	33.71	340000000	1	19804	200716_dc_IP79_NormalLung-W6Ab_DDA-OTOT-HCD_25cmPepMap2uTT_145m_01.raw	2	2	Q15459|SF3A1_HUMAN				1
M(+15.99)PFTTRDFSIRSL	38.59	1585.79	13	-0.5	529.604	72.09	6600000	1	47166	200716_dc_IP79_NormalLung-W6Ab_DDA-OTOT-HCD_25cmPepMap2uTT_145m_01.raw	1	1	P51692|STA5B_HUMAN	Oxidation (M)	M1:Oxidation (M):1000.00		0
KYKPLDLRPK	38.59	1256.76	10	-0.3	419.927	33.46	34100000	1	19892	200716_dc_IP79_NormalLung-W6Ab_DDA-OTOT-HCD_25cmPepMap2uTT_145m_01.raw	1	1	P42766|RL35_HUMAN				1
NPKEFYHEV	38.59	1161.55	9	-1.8	581.779	41.57	5670000	1	25743	200716_dc_IP79_NormalLung-W6Ab_DDA-OTOT-HCD_25cmPepMap2uTT_145m_01.raw	1	1	Q6P2Q9|PRP8_HUMAN				1
TPRDGKAFRIF	38.58	1306.71	11	-1.1	436.578	50.81	2200000	1	32285	200716_dc_IP79_NormalLung-W6Ab_DDA-OTOT-HCD_25cmPepMap2uTT_145m_01.raw	1	1	Q9H0B8|CRLD2_HUMAN				0
SAKKVKTPQPK	38.58	1210.74	11	-0.5	404.587	17.07	2800000	1	8406	200716_dc_IP79_NormalLung-W6Ab_DDA-OTOT-HCD_25cmPepMap2uTT_145m_01.raw	2	2	P16402|H13_HUMAN				1
YPSVGQLAHKL	38.57	1211.67	11	-1.7	404.895	59.2	17700000	1	38175	200716_dc_IP79_NormalLung-W6Ab_DDA-OTOT-HCD_25cmPepMap2uTT_145m_01.raw	1	1	P05107|ITB2_HUMAN				0
YVVRKPLNK	38.57	1115.68	9	-1.5	372.901	28.45	16800000	1	16402	200716_dc_IP79_NormalLung-W6Ab_DDA-OTOT-HCD_25cmPepMap2uTT_145m_01.raw	1	1	P62753|RS6_HUMAN				0
TDTLREVQLR	38.56	1229.67	10	-0.8	615.843	46.04	25200000	1	28921	200716_dc_IP79_NormalLung-W6Ab_DDA-OTOT-HCD_25cmPepMap2uTT_145m_01.raw	2	2	P08311|CATG_HUMAN				0
PSKGPLQSVQVF	38.56	1285.7	12	-1.3	643.858	69.97	5250000	1	45798	200716_dc_IP79_NormalLung-W6Ab_DDA-OTOT-HCD_25cmPepMap2uTT_145m_01.raw	1	1	P62249|RS16_HUMAN				1
QSAFFQGKLK	38.55	1152.63	10	-1.2	577.321	46.09	2440000	1	28985	200716_dc_IP79_NormalLung-W6Ab_DDA-OTOT-HCD_25cmPepMap2uTT_145m_01.raw	1	1	P22307|NLTP_HUMAN				0
TPAVVSERLKIR	38.54	1367.82	12	-0.9	456.949	44.67	3860000	1	27943	200716_dc_IP79_NormalLung-W6Ab_DDA-OTOT-HCD_25cmPepMap2uTT_145m_01.raw	1	1	P62851|RS25_HUMAN				0
RYNDLMKKK	38.54	1194.65	9	-2.2	399.224	26.25	7780000	1	14837	200716_dc_IP79_NormalLung-W6Ab_DDA-OTOT-HCD_25cmPepMap2uTT_145m_01.raw	1	1	O95347|SMC2_HUMAN				1
HQPHKVTQYK	38.53	1264.67	10	-0.4	422.563	22.46	10400000	1	12467	200716_dc_IP79_NormalLung-W6Ab_DDA-OTOT-HCD_25cmPepMap2uTT_145m_01.raw	1	1	Q969Q0|RL36L_HUMAN:P83881|RL36A_HUMAN				1
KTESHHKAKGK	38.52	1249.69	11	-0.2	625.852	8.23	555000	1	2270	200716_dc_IP79_NormalLung-W6Ab_DDA-OTOT-HCD_25cmPepMap2uTT_145m_01.raw	1	1	P20671|H2A1D_HUMAN:P04908|H2A1B_HUMAN:Q93077|H2A1C_HUMAN:Q7L7L0|H2A3_HUMAN:P0C0S8|H2A1_HUMAN:Q6FI13|H2A2A_HUMAN				1
RLIQIAARKK	38.51	1195.79	10	-1.7	399.603	28.11	19400000	1	16133	200716_dc_IP79_NormalLung-W6Ab_DDA-OTOT-HCD_25cmPepMap2uTT_145m_01.raw	1	1	Q9BUJ2|HNRL1_HUMAN				1
MPKFSVSGL	38.51	964.505	9	-1.4	483.259	71.45	0	1	46859	200716_dc_IP79_NormalLung-W6Ab_DDA-OTOT-HCD_25cmPepMap2uTT_145m_01.raw	0	0	Q09666|AHNK_HUMAN				1
TDHLVKTHTR	38.51	1206.65	10	-1.4	403.222	24.87	0	1	13774	200716_dc_IP79_NormalLung-W6Ab_DDA-OTOT-HCD_25cmPepMap2uTT_145m_01.raw	0	0	P15880|RS2_HUMAN				0
YPPPVDPKKLI	38.51	1265.74	11	-1.1	422.92	64.67	10700000	1	42256	200716_dc_IP79_NormalLung-W6Ab_DDA-OTOT-HCD_25cmPepMap2uTT_145m_01.raw	2	2	Q8WVX9|FACR1_HUMAN				0
KAKPVKPKAK	38.5	1093.73	10	-0.3	365.585	10.94	19500000	1	3900	200716_dc_IP79_NormalLung-W6Ab_DDA-OTOT-HCD_25cmPepMap2uTT_145m_01.raw	2	2	P07305|H10_HUMAN				0
SDNQLQEGKN	38.49	1131.52	10	-1.1	566.764	27.57	9840000	1	15746	200716_dc_IP79_NormalLung-W6Ab_DDA-OTOT-HCD_25cmPepMap2uTT_145m_01.raw	1	1	P37802|TAGL2_HUMAN				1
VSYSHIQSK	38.49	1047.53	9	-1.2	524.774	28.7	7850000	1	16598	200716_dc_IP79_NormalLung-W6Ab_DDA-OTOT-HCD_25cmPepMap2uTT_145m_01.raw	2	2	P27816|MAP4_HUMAN				1
GYDVEKNNSR	38.48	1180.55	10	-0.1	591.281	27.57	9630000	1	15783	200716_dc_IP79_NormalLung-W6Ab_DDA-OTOT-HCD_25cmPepMap2uTT_145m_01.raw	2	2	P16403|H12_HUMAN:P10412|H14_HUMAN:P16402|H13_HUMAN:P16401|H15_HUMAN:Q02539|H11_HUMAN:P22492|H1T_HUMAN				0
NADEFEDM(+15.99)VAEK	38.48	1412.58	12	-1.7	707.294	50.62	7550000	1	32236	200716_dc_IP79_NormalLung-W6Ab_DDA-OTOT-HCD_25cmPepMap2uTT_145m_01.raw	2	2	P27635|RL10_HUMAN	Oxidation (M)	M8:Oxidation (M):1000.00		0
ASGSFKLNK	38.47	950.519	9	-1.8	476.266	33.14	6830000	1	19720	200716_dc_IP79_NormalLung-W6Ab_DDA-OTOT-HCD_25cmPepMap2uTT_145m_01.raw	1	1	P16403|H12_HUMAN:P10412|H14_HUMAN:P16402|H13_HUMAN:P16401|H15_HUMAN:Q02539|H11_HUMAN				1
LPKKTESHHKT	38.47	1304.72	11	-1.2	435.913	12.57	466000	1	5124	200716_dc_IP79_NormalLung-W6Ab_DDA-OTOT-HCD_25cmPepMap2uTT_145m_01.raw	1	1	Q99878|H2A1J_HUMAN				0
SYQFWDTQPVPK	38.45	1494.71	12	0	748.364	73	0	1	47939	200716_dc_IP79_NormalLung-W6Ab_DDA-OTOT-HCD_25cmPepMap2uTT_145m_01.raw	0	0	P30419|NMT1_HUMAN				0
AASGEAKPKVK	38.45	1084.62	11	-0.7	362.548	17.12	3260000	1	8299	200716_dc_IP79_NormalLung-W6Ab_DDA-OTOT-HCD_25cmPepMap2uTT_145m_01.raw	2	2	P16403|H12_HUMAN				0
APFHSHEL	38.44	936.445	8	-1.5	469.229	34.2	8020000	1	20485	200716_dc_IP79_NormalLung-W6Ab_DDA-OTOT-HCD_25cmPepMap2uTT_145m_01.raw	1	1	Q68CZ2|TENS3_HUMAN				1
IPKDYKTMTAL	38.44	1279.68	11	-0.1	640.85	52.68	14200000	1	33603	200716_dc_IP79_NormalLung-W6Ab_DDA-OTOT-HCD_25cmPepMap2uTT_145m_01.raw	1	1	P31321|KAP1_HUMAN				1
SFKLSGFSFKK	38.43	1274.7	11	-1.3	425.908	55.89	3110000	1	35959	200716_dc_IP79_NormalLung-W6Ab_DDA-OTOT-HCD_25cmPepMap2uTT_145m_01.raw	1	1	P29966|MARCS_HUMAN				0
DRVYIHPFHL	38.43	1295.68	10	0	432.9	58.56	621000000	1	37468	200716_dc_IP79_NormalLung-W6Ab_DDA-OTOT-HCD_25cmPepMap2uTT_145m_01.raw	7	7	P01019|ANGT_HUMAN				1
RQVTFTKRK	38.43	1162.69	9	0.4	388.572	23.87	1840000	1	12902	200716_dc_IP79_NormalLung-W6Ab_DDA-OTOT-HCD_25cmPepMap2uTT_145m_01.raw	1	1	Q14814|MEF2D_HUMAN:Q02080|MEF2B_HUMAN:Q06413|MEF2C_HUMAN:Q02078|MEF2A_HUMAN				0
N(+.98)VSLLALYKGK	38.43	1205.7	11	-0.8	603.858	71.77	0	1	47071	200716_dc_IP79_NormalLung-W6Ab_DDA-OTOT-HCD_25cmPepMap2uTT_145m_01.raw	0	0	P62266|RS23_HUMAN	Deamidation (NQ)	N1:Deamidation (NQ):1000.00		0
TPKQEIQHL	38.42	1092.59	9	-1	547.303	34.79	15400000	1	20908	200716_dc_IP79_NormalLung-W6Ab_DDA-OTOT-HCD_25cmPepMap2uTT_145m_01.raw	2	2	P04844|RPN2_HUMAN				0
HPHFLTHKL	38.42	1128.62	9	-1	377.213	33.76	4430000	1	20185	200716_dc_IP79_NormalLung-W6Ab_DDA-OTOT-HCD_25cmPepMap2uTT_145m_01.raw	1	1	O00159|MYO1C_HUMAN				1
NPKILKQSM	38.42	1057.6	9	-0.5	529.805	35.58	2930000	1	21501	200716_dc_IP79_NormalLung-W6Ab_DDA-OTOT-HCD_25cmPepMap2uTT_145m_01.raw	1	1	P05412|JUN_HUMAN				0
ISMPDVDLHLK	38.41	1266.66	11	-1.1	423.228	70.49	0	1	46262	200716_dc_IP79_NormalLung-W6Ab_DDA-OTOT-HCD_25cmPepMap2uTT_145m_01.raw	0	0	Q09666|AHNK_HUMAN				1
TTVVNPKYEGK	38.39	1234.66	11	-1.3	412.559	32.18	4220000	1	19050	200716_dc_IP79_NormalLung-W6Ab_DDA-OTOT-HCD_25cmPepMap2uTT_145m_01.raw	1	1	P05556|ITB1_HUMAN				1
RPESLHQVSF	38.39	1198.61	10	-1.1	600.311	45.95	7440000	1	28883	200716_dc_IP79_NormalLung-W6Ab_DDA-OTOT-HCD_25cmPepMap2uTT_145m_01.raw	1	1	P04040|CATA_HUMAN				1
RFVNVVPTFGK	38.38	1262.71	11	-0.5	632.364	61.82	3430000	1	40056	200716_dc_IP79_NormalLung-W6Ab_DDA-OTOT-HCD_25cmPepMap2uTT_145m_01.raw	1	1	P62861|RS30_HUMAN				1
SSAVDPEPQVK	38.38	1155.58	11	-0.5	578.795	38.6	2130000	1	23661	200716_dc_IP79_NormalLung-W6Ab_DDA-OTOT-HCD_25cmPepMap2uTT_145m_01.raw	1	1	Q5SSJ5|HP1B3_HUMAN				0
MPNGTPHPTA	38.37	1021.47	10	-0.6	511.74	36.71	9600000	1	22240	200716_dc_IP79_NormalLung-W6Ab_DDA-OTOT-HCD_25cmPepMap2uTT_145m_01.raw	1	1	Q96PU8|QKI_HUMAN				1
SGVSLAALKKAL	38.36	1156.72	12	-1.3	579.365	66.22	2720000	1	43213	200716_dc_IP79_NormalLung-W6Ab_DDA-OTOT-HCD_25cmPepMap2uTT_145m_01.raw	1	1	P16403|H12_HUMAN:P10412|H14_HUMAN:P16402|H13_HUMAN				0
QQKPTLSGQRFK	38.35	1416.78	12	-0.5	473.268	30.77	4200000	1	18047	200716_dc_IP79_NormalLung-W6Ab_DDA-OTOT-HCD_25cmPepMap2uTT_145m_01.raw	1	1	Q7L1Q6|BZW1_HUMAN				0
M(+15.99)PSLKHIVEL	38.34	1181.65	10	-1.3	591.83	56.68	7620000	1	36472	200716_dc_IP79_NormalLung-W6Ab_DDA-OTOT-HCD_25cmPepMap2uTT_145m_01.raw	2	2	O60518|RNBP6_HUMAN	Oxidation (M)	M1:Oxidation (M):1000.00		0
GFDYKGEVEK	38.33	1170.56	10	-0.9	586.285	41.81	5250000	1	25930	200716_dc_IP79_NormalLung-W6Ab_DDA-OTOT-HCD_25cmPepMap2uTT_145m_01.raw	2	2	P14317|HCLS1_HUMAN				0
SGAISAIKAETK	38.33	1174.66	12	-1.2	588.335	37.75	1550000	1	23044	200716_dc_IP79_NormalLung-W6Ab_DDA-OTOT-HCD_25cmPepMap2uTT_145m_01.raw	1	1	P18615|NELFE_HUMAN				0
IPGSPFKAHVV	38.32	1150.65	11	-0.3	576.332	52.29	12500000	1	33420	200716_dc_IP79_NormalLung-W6Ab_DDA-OTOT-HCD_25cmPepMap2uTT_145m_01.raw	2	2	P21333|FLNA_HUMAN				0
REAEFTKSIA	38.31	1150.6	10	-1.6	384.539	38.5	86600000	1	23519	200716_dc_IP79_NormalLung-W6Ab_DDA-OTOT-HCD_25cmPepMap2uTT_145m_01.raw	2	2	Q15005|SPCS2_HUMAN				1
RPANHRQLTF	38.31	1238.66	10	-0.8	413.895	31.06	67300000	1	18195	200716_dc_IP79_NormalLung-W6Ab_DDA-OTOT-HCD_25cmPepMap2uTT_145m_01.raw	2	2	Q9UNM6|PSD13_HUMAN				1
HEVGWKYQ	38.3	1045.5	8	-1.2	523.756	38.54	14600000	1	23584	200716_dc_IP79_NormalLung-W6Ab_DDA-OTOT-HCD_25cmPepMap2uTT_145m_01.raw	1	1	P40429|RL13A_HUMAN				1
SPLFMGKVVNPTQ	38.3	1416.74	13	-0.7	709.379	68.94	854000	1	45245	200716_dc_IP79_NormalLung-W6Ab_DDA-OTOT-HCD_25cmPepMap2uTT_145m_01.raw	1	1	P01009|A1AT_HUMAN				0
TQVYKPPALKK	38.29	1271.76	11	-0.7	424.927	34.01	10100000	1	20254	200716_dc_IP79_NormalLung-W6Ab_DDA-OTOT-HCD_25cmPepMap2uTT_145m_01.raw	1	1	Q96GY0|ZC21A_HUMAN				0
VEFENPDEAEK	38.27	1305.57	11	-0.7	653.793	47.95	3670000	1	30282	200716_dc_IP79_NormalLung-W6Ab_DDA-OTOT-HCD_25cmPepMap2uTT_145m_01.raw	1	1	Q15287|RNPS1_HUMAN				0
GGYDVEKNNS	38.25	1081.47	10	-0.6	541.741	31.22	0	1	18376	200716_dc_IP79_NormalLung-W6Ab_DDA-OTOT-HCD_25cmPepMap2uTT_145m_01.raw	0	0	P16401|H15_HUMAN				0
LFM(+15.99)GKVVNPTQK	38.24	1376.75	12	-0.4	459.923	43.83	1950000	1	27416	200716_dc_IP79_NormalLung-W6Ab_DDA-OTOT-HCD_25cmPepMap2uTT_145m_01.raw	1	1	P01009|A1AT_HUMAN	Oxidation (M)	M3:Oxidation (M):1000.00		0
KLKGDDLQAIK	38.23	1227.72	11	-0.6	410.247	33.66	8120000	1	20100	200716_dc_IP79_NormalLung-W6Ab_DDA-OTOT-HCD_25cmPepMap2uTT_145m_01.raw	1	1	P07910|HNRPC_HUMAN:B2RXH8|HNRC2_HUMAN:O60812|HNRC1_HUMAN:P0DMR1|HNRC4_HUMAN:B7ZW38|HNRC3_HUMAN				1
IPKKHISQI	38.23	1062.65	9	-0.7	532.334	28.16	16000000	1	16158	200716_dc_IP79_NormalLung-W6Ab_DDA-OTOT-HCD_25cmPepMap2uTT_145m_01.raw	1	1	P49773|HINT1_HUMAN				1
SLQREPFTIAQGK	38.23	1473.79	13	3	492.273	50.27	3650000	1	31893	200716_dc_IP79_NormalLung-W6Ab_DDA-OTOT-HCD_25cmPepMap2uTT_145m_01.raw	1	1	P35659|DEK_HUMAN				0
HNLGHGHKHE	38.23	1164.55	10	0.4	389.192	11.72	338000	1	4533	200716_dc_IP79_NormalLung-W6Ab_DDA-OTOT-HCD_25cmPepMap2uTT_145m_01.raw	1	1	P01042|KNG1_HUMAN				0
IPKLPAVSFL	38.22	1083.67	10	-1.1	542.841	90.26	3420000	1	60016	200716_dc_IP79_NormalLung-W6Ab_DDA-OTOT-HCD_25cmPepMap2uTT_145m_01.raw	1	1	O96009|NAPSA_HUMAN				0
TGYGGYEEYSGL	38.18	1294.54	12	-1.5	648.274	76.92	3320000	1	50597	200716_dc_IP79_NormalLung-W6Ab_DDA-OTOT-HCD_25cmPepMap2uTT_145m_01.raw	1	1	P52597|HNRPF_HUMAN				1
RPIFPGKHYL	38.18	1226.69	10	-1.9	409.904	45.87	0	1	28810	200716_dc_IP79_NormalLung-W6Ab_DDA-OTOT-HCD_25cmPepMap2uTT_145m_01.raw	0	0	P28482|MK01_HUMAN:P27361|MK03_HUMAN				1
RPFHGISTVSL	38.17	1212.66	11	-1	405.227	56.34	6880000	1	36203	200716_dc_IP79_NormalLung-W6Ab_DDA-OTOT-HCD_25cmPepMap2uTT_145m_01.raw	2	2	Q5VZ89|DEN4C_HUMAN				1
AEAEASRLTA	38.17	1017.51	10	-0.3	1018.52	36.37	54000000	1	22016	200716_dc_IP79_NormalLung-W6Ab_DDA-OTOT-HCD_25cmPepMap2uTT_145m_01.raw	2	2	O95236|APOL3_HUMAN				1
SYSKQFTSSTS	38.17	1221.55	11	-0.9	611.782	37.06	3830000	1	22524	200716_dc_IP79_NormalLung-W6Ab_DDA-OTOT-HCD_25cmPepMap2uTT_145m_01.raw	1	1	P02671|FIBA_HUMAN				1
KSVAFKKTK	38.16	1035.64	9	-1.6	518.828	14.94	1950000	1	6791	200716_dc_IP79_NormalLung-W6Ab_DDA-OTOT-HCD_25cmPepMap2uTT_145m_01.raw	1	1	P07305|H10_HUMAN				0
SPLFMGKVVNP	38.15	1187.64	11	-0.5	594.826	68.34	1120000	1	44847	200716_dc_IP79_NormalLung-W6Ab_DDA-OTOT-HCD_25cmPepMap2uTT_145m_01.raw	1	1	P01009|A1AT_HUMAN				0
SPFSYKNVL	38.15	1053.55	9	-1.4	527.781	68.19	4550000	1	44645	200716_dc_IP79_NormalLung-W6Ab_DDA-OTOT-HCD_25cmPepMap2uTT_145m_01.raw	1	1	P05556|ITB1_HUMAN				1
SLRKKKEPIEK	38.14	1354.83	11	-0.2	452.617	24.53	2130000	1	13528	200716_dc_IP79_NormalLung-W6Ab_DDA-OTOT-HCD_25cmPepMap2uTT_145m_01.raw	1	1	Q9NR30|DDX21_HUMAN				0
TTVFSHAQTV	38.13	1089.55	10	-0.9	545.779	46.82	3920000	1	29516	200716_dc_IP79_NormalLung-W6Ab_DDA-OTOT-HCD_25cmPepMap2uTT_145m_01.raw	1	1	Q71UM5|RS27L_HUMAN:P42677|RS27_HUMAN				1
TEALHFVAA	38.1	957.492	9	-1.9	479.752	57.62	28200000	1	37029	200716_dc_IP79_NormalLung-W6Ab_DDA-OTOT-HCD_25cmPepMap2uTT_145m_01.raw	1	1	P07199|CENPB_HUMAN				1
SEYIHAQVA	38.1	1016.49	9	-2.2	509.252	44.57	58600000	1	27810	200716_dc_IP79_NormalLung-W6Ab_DDA-OTOT-HCD_25cmPepMap2uTT_145m_01.raw	2	2	O95302|FKBP9_HUMAN:Q75LS8|FKB9L_HUMAN				1
TRLKTKENLEKT	38.09	1459.84	12	-2.2	365.965	26.25	109000000	1	14734	200716_dc_IP79_NormalLung-W6Ab_DDA-OTOT-HCD_25cmPepMap2uTT_145m_01.raw	3	3	Q6NZI2|CAVN1_HUMAN				0
SYVTTSTR	38.09	913.451	8	-0.9	914.457	31.75	187000000	1	18726	200716_dc_IP79_NormalLung-W6Ab_DDA-OTOT-HCD_25cmPepMap2uTT_145m_01.raw	2	2	P08670|VIME_HUMAN				0
TSN(+.98)HQKISSGK	38.08	1186.59	11	-1	396.538	14.46	4170000	1	6401	200716_dc_IP79_NormalLung-W6Ab_DDA-OTOT-HCD_25cmPepMap2uTT_145m_01.raw	3	3	O95810|CAVN2_HUMAN	Deamidation (NQ)	N3:Deamidation (NQ):26.31		0
SRQVGKEKGKY	38.08	1278.7	11	-0.8	427.242	16.49	407000	1	7864	200716_dc_IP79_NormalLung-W6Ab_DDA-OTOT-HCD_25cmPepMap2uTT_145m_01.raw	1	1	P61254|RL26_HUMAN:Q9UNX3|RL26L_HUMAN				0
KFFQEFKADIK	38.06	1399.75	11	-0.5	467.59	54.51	4000000	1	35004	200716_dc_IP79_NormalLung-W6Ab_DDA-OTOT-HCD_25cmPepMap2uTT_145m_01.raw	1	1	Q9BZV1|UBXN6_HUMAN				0
HLTPEEKSAVTA	38.06	1281.66	12	-0.3	641.835	34.65	2440000	1	20855	200716_dc_IP79_NormalLung-W6Ab_DDA-OTOT-HCD_25cmPepMap2uTT_145m_01.raw	2	2	P68871|HBB_HUMAN				1
GGKGLGKGGAK	38.06	928.545	11	-0.4	465.28	11.77	1410000	1	4555	200716_dc_IP79_NormalLung-W6Ab_DDA-OTOT-HCD_25cmPepMap2uTT_145m_01.raw	1	1	P62805|H4_HUMAN				0
SIKNIQKITK	38.06	1171.73	10	-0.6	391.583	29.14	18500000	1	16901	200716_dc_IP79_NormalLung-W6Ab_DDA-OTOT-HCD_25cmPepMap2uTT_145m_01.raw	1	1	P36542|ATPG_HUMAN				0
KQYDYDSSTIRK	38.05	1502.74	12	0.3	501.92	32.76	1740000	1	19565	200716_dc_IP79_NormalLung-W6Ab_DDA-OTOT-HCD_25cmPepMap2uTT_145m_01.raw	1	1	Q9BZQ8|NIBAN_HUMAN				1
GTGASGSFKLN(+.98)K	38.05	1166.59	12	-0.8	584.303	36.17	13600000	1	21862	200716_dc_IP79_NormalLung-W6Ab_DDA-OTOT-HCD_25cmPepMap2uTT_145m_01.raw	2	2	P16403|H12_HUMAN:P10412|H14_HUMAN:P16402|H13_HUMAN:P16401|H15_HUMAN:Q02539|H11_HUMAN	Deamidation (NQ)	N11:Deamidation (NQ):1000.00		0
SGEAKPKAK	38.05	914.519	9	-0.4	458.266	9	2160000	1	2806	200716_dc_IP79_NormalLung-W6Ab_DDA-OTOT-HCD_25cmPepMap2uTT_145m_01.raw	1	1	P10412|H14_HUMAN:P16401|H15_HUMAN				0
TPKTTGARVEL	38.04	1171.66	11	0.4	391.559	37.21	7890000	1	22650	200716_dc_IP79_NormalLung-W6Ab_DDA-OTOT-HCD_25cmPepMap2uTT_145m_01.raw	2	2	P09543|CN37_HUMAN				1
KPKNAIHTF	38.03	1054.59	9	-1.5	528.303	27.75	25700000	1	15894	200716_dc_IP79_NormalLung-W6Ab_DDA-OTOT-HCD_25cmPepMap2uTT_145m_01.raw	1	1	P04040|CATA_HUMAN				1
MPKMKMPKF	38.03	1136.59	9	-1.1	379.87	51.95	19700000	1	33212	200716_dc_IP79_NormalLung-W6Ab_DDA-OTOT-HCD_25cmPepMap2uTT_145m_01.raw	1	1	Q09666|AHNK_HUMAN				1
TDFDRFKVM(+15.99)K	38.02	1301.64	10	-0.9	651.829	43.58	5800000	1	27163	200716_dc_IP79_NormalLung-W6Ab_DDA-OTOT-HCD_25cmPepMap2uTT_145m_01.raw	1	1	P50914|RL14_HUMAN	Oxidation (M)	M9:Oxidation (M):1000.00		0
STPLGQQQPAPR	38.02	1278.67	12	-2.5	640.34	38.01	905000	1	23269	200716_dc_IP79_NormalLung-W6Ab_DDA-OTOT-HCD_25cmPepMap2uTT_145m_01.raw	1	1	Q14767|LTBP2_HUMAN				0
NPFGGASHAK	38.01	984.478	10	-2.1	493.245	27.18	40200000	1	15880	200716_dc_IP79_NormalLung-W6Ab_DDA-OTOT-HCD_25cmPepMap2uTT_145m_01.raw	2	2	P62266|RS23_HUMAN				0
RPHYGKLKEI	38.01	1239.71	10	-1.2	414.243	30.76	2470000	1	18074	200716_dc_IP79_NormalLung-W6Ab_DDA-OTOT-HCD_25cmPepMap2uTT_145m_01.raw	1	1	Q13200|PSMD2_HUMAN				1
KATQASQEY	38	1024.48	9	-1	1025.49	27.57	31900000	1	15767	200716_dc_IP79_NormalLung-W6Ab_DDA-OTOT-HCD_25cmPepMap2uTT_145m_01.raw	2	2	P16104|H2AX_HUMAN				1
LVSKGTLVQTK	37.99	1172.71	11	-1	391.911	33.32	3530000	1	19873	200716_dc_IP79_NormalLung-W6Ab_DDA-OTOT-HCD_25cmPepMap2uTT_145m_01.raw	1	1	P16403|H12_HUMAN:P10412|H14_HUMAN:P16402|H13_HUMAN:P16401|H15_HUMAN:Q02539|H11_HUMAN				1
SVPADLSRPK	37.99	1068.59	10	-0.8	357.205	34.89	35900000	1	20771	200716_dc_IP79_NormalLung-W6Ab_DDA-OTOT-HCD_25cmPepMap2uTT_145m_01.raw	2	2	P27816|MAP4_HUMAN				0
SEQTRVNAA	37.98	974.478	9	-1	488.246	26.99	820000	1	15336	200716_dc_IP79_NormalLung-W6Ab_DDA-OTOT-HCD_25cmPepMap2uTT_145m_01.raw	1	1	P46776|RL27A_HUMAN				1
KVLALQARKK	37.98	1153.77	10	0.6	385.596	25.66	7960000	1	14393	200716_dc_IP79_NormalLung-W6Ab_DDA-OTOT-HCD_25cmPepMap2uTT_145m_01.raw	1	1	Q96SB4|SRPK1_HUMAN				1
NPQKVGKDHTL	37.96	1235.66	11	-0.4	412.894	26.54	7430000	1	15016	200716_dc_IP79_NormalLung-W6Ab_DDA-OTOT-HCD_25cmPepMap2uTT_145m_01.raw	1	1	Q9Y295|DRG1_HUMAN				0
SGPGSRISSSS	37.96	1020.48	11	-1.5	511.248	28.55	2600000	1	16502	200716_dc_IP79_NormalLung-W6Ab_DDA-OTOT-HCD_25cmPepMap2uTT_145m_01.raw	1	1	P05787|K2C8_HUMAN				0
SLPLVDTHSKR	37.95	1251.69	11	-1	418.238	35.87	8230000	1	21632	200716_dc_IP79_NormalLung-W6Ab_DDA-OTOT-HCD_25cmPepMap2uTT_145m_01.raw	1	1	P08670|VIME_HUMAN				1
HTLEKRMNK	37.95	1155.62	9	0.2	386.213	19.31	357000000	1	9957	200716_dc_IP79_NormalLung-W6Ab_DDA-OTOT-HCD_25cmPepMap2uTT_145m_01.raw	2	2	Q6NZI2|CAVN1_HUMAN				1
KPKAPPPSL	37.95	933.565	9	-0.9	467.789	29.88	33900000	1	17678	200716_dc_IP79_NormalLung-W6Ab_DDA-OTOT-HCD_25cmPepMap2uTT_145m_01.raw	1	1	Q9NZZ3|CHMP5_HUMAN				1
SPAARSLSL	37.94	900.503	9	-1.8	451.258	46.98	47800000	1	29533	200716_dc_IP79_NormalLung-W6Ab_DDA-OTOT-HCD_25cmPepMap2uTT_145m_01.raw	2	2	Q9BXM0|PRAX_HUMAN				0
AASLRC(+119.00)QNY	37.94	1143.48	9	-0.8	572.747	33.86	843000	1	20326	200716_dc_IP79_NormalLung-W6Ab_DDA-OTOT-HCD_25cmPepMap2uTT_145m_01.raw	1	1	P41226|UBA7_HUMAN	Cysteinylation	C6:Cysteinylation:1000.00		0
TVGMNFKTPR	37.94	1149.6	10	-1.2	384.206	44.12	12700000	1	27480	200716_dc_IP79_NormalLung-W6Ab_DDA-OTOT-HCD_25cmPepMap2uTT_145m_01.raw	1	1	P08708|RS17_HUMAN				0
SAVGFDYKGEVEK	37.94	1427.69	13	-1.7	476.904	49.53	4950000	1	31431	200716_dc_IP79_NormalLung-W6Ab_DDA-OTOT-HCD_25cmPepMap2uTT_145m_01.raw	2	2	P14317|HCLS1_HUMAN				0
HQIKQAVKK	37.94	1078.66	9	-1	540.337	14.98	10900000	1	6754	200716_dc_IP79_NormalLung-W6Ab_DDA-OTOT-HCD_25cmPepMap2uTT_145m_01.raw	2	2	P62750|RL23A_HUMAN				1
STASHRPIK	37.93	995.551	9	-1.3	498.782	15.81	2800000	1	7347	200716_dc_IP79_NormalLung-W6Ab_DDA-OTOT-HCD_25cmPepMap2uTT_145m_01.raw	1	1	P41236|IPP2_HUMAN:Q6NXS1|IPP2B_HUMAN				1
YLKDVTLQK	37.92	1106.63	9	-1.5	554.323	41.27	10800000	1	25510	200716_dc_IP79_NormalLung-W6Ab_DDA-OTOT-HCD_25cmPepMap2uTT_145m_01.raw	2	2	P18621|RL17_HUMAN				0
TGANGSFKLNR	37.92	1163.6	11	-0.1	582.81	35.24	2180000	1	21251	200716_dc_IP79_NormalLung-W6Ab_DDA-OTOT-HCD_25cmPepMap2uTT_145m_01.raw	1	1	Q92522|H1X_HUMAN				0
STSYNRGDSTFES	37.91	1449.6	13	-1.9	725.806	41.71	2630000	1	25872	200716_dc_IP79_NormalLung-W6Ab_DDA-OTOT-HCD_25cmPepMap2uTT_145m_01.raw	1	1	P02671|FIBA_HUMAN				1
TYC(+119.00)FNKPEDK	37.89	1362.56	10	-1.5	682.285	35.73	7040000	1	21614	200716_dc_IP79_NormalLung-W6Ab_DDA-OTOT-HCD_25cmPepMap2uTT_145m_01.raw	2	2	P62979|RS27A_HUMAN	Cysteinylation	C3:Cysteinylation:1000.00		0
SVTEHPSPSP	37.86	1036.48	10	-1.1	519.248	33.1	8580000	1	19601	200716_dc_IP79_NormalLung-W6Ab_DDA-OTOT-HCD_25cmPepMap2uTT_145m_01.raw	1	1	P07910|HNRPC_HUMAN				0
FVATGHGKYEK	37.85	1235.63	11	-2.1	412.883	27.18	3280000	1	15496	200716_dc_IP79_NormalLung-W6Ab_DDA-OTOT-HCD_25cmPepMap2uTT_145m_01.raw	1	1	P33241|LSP1_HUMAN				0
VATTRDYYF	37.85	1134.53	9	0	1135.54	58.46	67900000	1	37686	200716_dc_IP79_NormalLung-W6Ab_DDA-OTOT-HCD_25cmPepMap2uTT_145m_01.raw	2	2	P06737|PYGL_HUMAN				1
TQDQISNIKY	37.85	1208.6	10	-0.7	605.309	52.24	12800000	1	33268	200716_dc_IP79_NormalLung-W6Ab_DDA-OTOT-HCD_25cmPepMap2uTT_145m_01.raw	1	1	Q14847|LASP1_HUMAN				0
KVKLEAEIATY	37.85	1263.71	11	0.5	632.861	53.33	10000000	1	34094	200716_dc_IP79_NormalLung-W6Ab_DDA-OTOT-HCD_25cmPepMap2uTT_145m_01.raw	2	2	P05783|K1C18_HUMAN				0
RPKQPGPVKL	37.85	1118.69	10	-0.3	373.905	30.72	13600000	1	17986	200716_dc_IP79_NormalLung-W6Ab_DDA-OTOT-HCD_25cmPepMap2uTT_145m_01.raw	1	1	Q9Y618|NCOR2_HUMAN				1
TAGIQRIPLPPPP	37.85	1355.79	13	-1.6	678.902	71.46	11700000	1	46854	200716_dc_IP79_NormalLung-W6Ab_DDA-OTOT-HCD_25cmPepMap2uTT_145m_01.raw	2	2	Q07666|KHDR1_HUMAN				0
KVVVSPTKK	37.84	984.633	9	-0.8	493.324	22.74	10800000	1	12248	200716_dc_IP79_NormalLung-W6Ab_DDA-OTOT-HCD_25cmPepMap2uTT_145m_01.raw	1	1	P19338|NUCL_HUMAN				1
TAMAAAKAPTK	37.84	1059.57	11	-2.8	530.793	27.62	6220000	1	15782	200716_dc_IP79_NormalLung-W6Ab_DDA-OTOT-HCD_25cmPepMap2uTT_145m_01.raw	1	1	P83731|RL24_HUMAN				0
KPPAKVEAKPK	37.84	1191.73	11	-0.3	398.252	17.37	3420000	1	8381	200716_dc_IP79_NormalLung-W6Ab_DDA-OTOT-HCD_25cmPepMap2uTT_145m_01.raw	2	2	P05114|HMGN1_HUMAN				0
IPSANPAKTM(+15.99)	37.83	1044.53	10	-1.1	523.27	34.25	13500000	1	20482	200716_dc_IP79_NormalLung-W6Ab_DDA-OTOT-HCD_25cmPepMap2uTT_145m_01.raw	1	1	Q8WUM4|PDC6I_HUMAN	Oxidation (M)	M10:Oxidation (M):1000.00		0
HFELGGDKK	37.83	1029.52	9	-0.6	515.769	28.41	21200000	1	16339	200716_dc_IP79_NormalLung-W6Ab_DDA-OTOT-HCD_25cmPepMap2uTT_145m_01.raw	1	1	Q969Q0|RL36L_HUMAN:P83881|RL36A_HUMAN				1
TGAGKHVP	37.83	765.413	8	-0.9	383.714	22.32	31300000	1	11824	200716_dc_IP79_NormalLung-W6Ab_DDA-OTOT-HCD_25cmPepMap2uTT_145m_01.raw	1	1	P68363|TBA1B_HUMAN:Q71U36|TBA1A_HUMAN:Q9BQE3|TBA1C_HUMAN:P0DPH8|TBA3D_HUMAN:P0DPH7|TBA3C_HUMAN:Q6PEY2|TBA3E_HUMAN:P68366|TBA4A_HUMAN				0
APRQPPRHL	37.81	1070.61	9	-0.6	357.877	27.13	7710000	1	15456	200716_dc_IP79_NormalLung-W6Ab_DDA-OTOT-HCD_25cmPepMap2uTT_145m_01.raw	1	1	Q9P2P1|NYNRI_HUMAN				1
KTRGIFETKF	37.8	1225.68	10	-1.1	613.847	46.09	235000000	1	28929	200716_dc_IP79_NormalLung-W6Ab_DDA-OTOT-HCD_25cmPepMap2uTT_145m_01.raw	2	2	P52789|HXK2_HUMAN:P19367|HXK1_HUMAN				1
KEIKKVATPK	37.8	1140.72	10	-0.9	381.248	24.77	3740000	1	13722	200716_dc_IP79_NormalLung-W6Ab_DDA-OTOT-HCD_25cmPepMap2uTT_145m_01.raw	1	1	P07305|H10_HUMAN				0
KEMESGPKA	37.8	975.47	9	-1.3	488.741	25.46	4970000	1	14243	200716_dc_IP79_NormalLung-W6Ab_DDA-OTOT-HCD_25cmPepMap2uTT_145m_01.raw	1	1	P14317|HCLS1_HUMAN				1
HLNDETTSKQIKS	37.79	1499.76	13	-0.4	500.926	27.62	922000	1	15854	200716_dc_IP79_NormalLung-W6Ab_DDA-OTOT-HCD_25cmPepMap2uTT_145m_01.raw	1	1	Q9NUQ9|FA49B_HUMAN				0
STNPFRPQK	37.79	1073.56	9	-0.3	537.788	31.25	151000000	1	18280	200716_dc_IP79_NormalLung-W6Ab_DDA-OTOT-HCD_25cmPepMap2uTT_145m_01.raw	2	2	P63218|GBG5_HUMAN				1
SSARVGLARART	37.79	1243.71	12	-1.4	415.577	27.38	75400000	1	15624	200716_dc_IP79_NormalLung-W6Ab_DDA-OTOT-HCD_25cmPepMap2uTT_145m_01.raw	2	2	O96009|NAPSA_HUMAN				1
SDYNYESKF	37.77	1151.48	9	-0.8	576.745	54.31	1170000	1	34831	200716_dc_IP79_NormalLung-W6Ab_DDA-OTOT-HCD_25cmPepMap2uTT_145m_01.raw	1	1	Q12906|ILF3_HUMAN				0
Q(-17.03)QKPGQPPK	37.77	989.529	9	-0.6	495.772	27.67	7360000	1	15826	200716_dc_IP79_NormalLung-W6Ab_DDA-OTOT-HCD_25cmPepMap2uTT_145m_01.raw	1	1	P06312|KV401_HUMAN	Pyro-glu from Q	Q1:Pyro-glu from Q:1000.00		0
YAVDRAITH	37.76	1044.54	9	-1.5	523.274	38.63	0	1	23648	200716_dc_IP79_NormalLung-W6Ab_DDA-OTOT-HCD_25cmPepMap2uTT_145m_01.raw	0	0	P14866|HNRPL_HUMAN				1
SPAVKAHLF	37.76	968.544	9	-0.8	485.279	45.11	7660000	1	28250	200716_dc_IP79_NormalLung-W6Ab_DDA-OTOT-HCD_25cmPepMap2uTT_145m_01.raw	1	1	O15119|TBX3_HUMAN				0
HQKPVLTGQRFK	37.76	1437.82	12	0.4	360.462	28.69	3420000	1	16564	200716_dc_IP79_NormalLung-W6Ab_DDA-OTOT-HCD_25cmPepMap2uTT_145m_01.raw	1	1	Q9Y6E2|BZW2_HUMAN				1
RPQHSLFNYF	37.75	1307.64	10	-1.4	436.887	68	1270000	1	44591	200716_dc_IP79_NormalLung-W6Ab_DDA-OTOT-HCD_25cmPepMap2uTT_145m_01.raw	1	1	Q15459|SF3A1_HUMAN				0
APYMRSM(+15.99)MQSL	37.75	1329.59	11	-0.6	665.801	55.45	4110000	1	35638	200716_dc_IP79_NormalLung-W6Ab_DDA-OTOT-HCD_25cmPepMap2uTT_145m_01.raw	1	1	Q9UMX0|UBQL1_HUMAN:Q9UHD9|UBQL2_HUMAN	Oxidation (M)	M7:Oxidation (M):9.34		0
RQFEGRHSK	37.74	1143.59	9	-1.1	382.203	14.78	10100000	1	6622	200716_dc_IP79_NormalLung-W6Ab_DDA-OTOT-HCD_25cmPepMap2uTT_145m_01.raw	2	2	Q6P2Q9|PRP8_HUMAN				1
IANYRPTL	37.73	946.524	8	-0.9	947.53	51.65	103000000	1	32895	200716_dc_IP79_NormalLung-W6Ab_DDA-OTOT-HCD_25cmPepMap2uTT_145m_01.raw	2	2	Q01082|SPTB2_HUMAN				1
KQKKPLVGK	37.71	1024.68	9	-1.2	513.345	14.6	9300000	1	6521	200716_dc_IP79_NormalLung-W6Ab_DDA-OTOT-HCD_25cmPepMap2uTT_145m_01.raw	2	2	P36578|RL4_HUMAN				1
TPMPSRPSTTP	37.71	1170.57	11	-0.3	586.292	42.35	56200000	1	26181	200716_dc_IP79_NormalLung-W6Ab_DDA-OTOT-HCD_25cmPepMap2uTT_145m_01.raw	1	1	P27816|MAP4_HUMAN				1
HTVLELPDNKR	37.7	1320.71	11	-0.9	441.245	39.99	1710000	1	24618	200716_dc_IP79_NormalLung-W6Ab_DDA-OTOT-HCD_25cmPepMap2uTT_145m_01.raw	1	1	Q2M1Z3|RHG31_HUMAN				0
SSGKSSPFK	37.68	923.471	9	-1	462.742	25.66	0	1	14357	200716_dc_IP79_NormalLung-W6Ab_DDA-OTOT-HCD_25cmPepMap2uTT_145m_01.raw	0	0	O95810|CAVN2_HUMAN				1
RPRPGTGQSRSF	37.68	1344.7	12	-1.7	449.24	27.43	2210000	1	15678	200716_dc_IP79_NormalLung-W6Ab_DDA-OTOT-HCD_25cmPepMap2uTT_145m_01.raw	1	1	Q9NR12|PDLI7_HUMAN				1
TGANGSFK	37.68	780.377	8	-1.1	781.383	26.64	0	1	15084	200716_dc_IP79_NormalLung-W6Ab_DDA-OTOT-HCD_25cmPepMap2uTT_145m_01.raw	0	0	Q92522|H1X_HUMAN				0
YIKDDFRFK	37.68	1230.64	9	-0.8	411.22	46.87	1410000	1	29598	200716_dc_IP79_NormalLung-W6Ab_DDA-OTOT-HCD_25cmPepMap2uTT_145m_01.raw	1	1	O14730|RIOK3_HUMAN				0
SLGSALRPST	37.67	987.535	10	-1.1	494.774	45.9	99600000	1	28731	200716_dc_IP79_NormalLung-W6Ab_DDA-OTOT-HCD_25cmPepMap2uTT_145m_01.raw	2	2	P08670|VIME_HUMAN				1
APSAKVKLL	37.67	925.596	9	-2.4	463.804	41.66	5670000	1	25763	200716_dc_IP79_NormalLung-W6Ab_DDA-OTOT-HCD_25cmPepMap2uTT_145m_01.raw	1	1	Q99549|MPP8_HUMAN				1
IPQKQREITL	37.66	1224.72	10	-1.1	613.366	41.12	192000000	1	25717	200716_dc_IP79_NormalLung-W6Ab_DDA-OTOT-HCD_25cmPepMap2uTT_145m_01.raw	2	2	Q9NR30|DDX21_HUMAN				1
TEKYEHKSEVK	37.65	1376.69	11	-0.9	459.905	18.21	8960000	1	8998	200716_dc_IP79_NormalLung-W6Ab_DDA-OTOT-HCD_25cmPepMap2uTT_145m_01.raw	2	2	Q9Y2X3|NOP58_HUMAN				0
RAHYLKKTK	37.64	1143.69	9	0.2	382.236	15.95	1690000	1	7413	200716_dc_IP79_NormalLung-W6Ab_DDA-OTOT-HCD_25cmPepMap2uTT_145m_01.raw	1	1	Q53GQ0|DHB12_HUMAN				0
TREYTINIHK	37.64	1273.68	10	0.3	425.567	35.97	4040000	1	21773	200716_dc_IP79_NormalLung-W6Ab_DDA-OTOT-HCD_25cmPepMap2uTT_145m_01.raw	1	1	P62899|RL31_HUMAN				0
VPDSSGPERIL	37.63	1168.61	11	-0.4	585.311	55.55	172000000	1	36040	200716_dc_IP79_NormalLung-W6Ab_DDA-OTOT-HCD_25cmPepMap2uTT_145m_01.raw	1	1	P61978|HNRPK_HUMAN				1
HLTPEEKSA	37.6	1010.5	9	-1.9	506.258	26.88	14300000	1	15280	200716_dc_IP79_NormalLung-W6Ab_DDA-OTOT-HCD_25cmPepMap2uTT_145m_01.raw	1	1	P68871|HBB_HUMAN				1
SAINEVVTREY	37.6	1279.64	11	-4.1	640.825	59.1	2240000	1	38214	200716_dc_IP79_NormalLung-W6Ab_DDA-OTOT-HCD_25cmPepMap2uTT_145m_01.raw	1	1	P62899|RL31_HUMAN				1
SVREPM(+15.99)QTGIK	37.6	1260.65	11	0	421.224	29.98	9780000	1	17476	200716_dc_IP79_NormalLung-W6Ab_DDA-OTOT-HCD_25cmPepMap2uTT_145m_01.raw	1	1	P25705|ATPA_HUMAN	Oxidation (M)	M6:Oxidation (M):1000.00		0
Q(-17.03)EQSFVIRA	37.6	1059.53	9	-1.6	1060.54	74.6	8230000	1	48981	200716_dc_IP79_NormalLung-W6Ab_DDA-OTOT-HCD_25cmPepMap2uTT_145m_01.raw	2	2	P05107|ITB2_HUMAN	Pyro-glu from Q	Q1:Pyro-glu from Q:1000.00		0
APKIPM(+15.99)PDFDL	37.59	1258.63	11	-1.4	630.32	78.8	6210000	1	52136	200716_dc_IP79_NormalLung-W6Ab_DDA-OTOT-HCD_25cmPepMap2uTT_145m_01.raw	1	1	Q09666|AHNK_HUMAN	Oxidation (M)	M6:Oxidation (M):1000.00		0
AYKSILQERVK	37.58	1333.77	11	-0.2	445.598	39.07	1990000	1	23980	200716_dc_IP79_NormalLung-W6Ab_DDA-OTOT-HCD_25cmPepMap2uTT_145m_01.raw	1	1	P13010|XRCC5_HUMAN				0
VINQTQKENLR	37.56	1341.74	11	-1.8	448.252	29.64	1100000	1	17273	200716_dc_IP79_NormalLung-W6Ab_DDA-OTOT-HCD_25cmPepMap2uTT_145m_01.raw	1	1	P42766|RL35_HUMAN				0
TAVVVGTITDDVR	37.55	1344.72	13	-1.5	673.369	62.95	3200000	1	40899	200716_dc_IP79_NormalLung-W6Ab_DDA-OTOT-HCD_25cmPepMap2uTT_145m_01.raw	1	1	Q07020|RL18_HUMAN				1
AKKPAAATVTK	37.55	1084.66	11	-0.5	362.56	19.88	4350000	1	10442	200716_dc_IP79_NormalLung-W6Ab_DDA-OTOT-HCD_25cmPepMap2uTT_145m_01.raw	1	1	P16403|H12_HUMAN				0
HLGGSGSVVP	37.55	908.472	10	-1.4	909.477	44.02	48900000	1	27428	200716_dc_IP79_NormalLung-W6Ab_DDA-OTOT-HCD_25cmPepMap2uTT_145m_01.raw	2	2	Q9HBL0|TENS1_HUMAN				0
SGEAKPKVK	37.54	942.55	9	-1.6	472.281	13.98	7770000	1	6015	200716_dc_IP79_NormalLung-W6Ab_DDA-OTOT-HCD_25cmPepMap2uTT_145m_01.raw	2	2	P16403|H12_HUMAN				0
APAQGLLRPIL	37.53	1147.71	11	-1.1	574.861	75.83	2120000	1	49859	200716_dc_IP79_NormalLung-W6Ab_DDA-OTOT-HCD_25cmPepMap2uTT_145m_01.raw	1	1	Q16651|PRSS8_HUMAN				1
KTISQAVNK	37.53	987.571	9	-0.8	494.793	25.98	390000	1	14600	200716_dc_IP79_NormalLung-W6Ab_DDA-OTOT-HCD_25cmPepMap2uTT_145m_01.raw	1	1	Q9Y2A7|NCKP1_HUMAN				1
TYIPPKGETK	37.52	1132.61	10	-0.3	378.545	28.75	134000000	1	16544	200716_dc_IP79_NormalLung-W6Ab_DDA-OTOT-HCD_25cmPepMap2uTT_145m_01.raw	3	3	P09429|HMGB1_HUMAN:B2RPK0|HGB1A_HUMAN				0
SGGGGGGGFGRVS	37.51	1050.48	13	0.3	526.25	34.35	900000	1	20642	200716_dc_IP79_NormalLung-W6Ab_DDA-OTOT-HCD_25cmPepMap2uTT_145m_01.raw	1	1	P13647|K2C5_HUMAN				1
SEIPKLPAVSF	37.51	1186.66	11	-1.6	594.336	83.69	14000000	1	55514	200716_dc_IP79_NormalLung-W6Ab_DDA-OTOT-HCD_25cmPepMap2uTT_145m_01.raw	1	1	O96009|NAPSA_HUMAN				1
GQESFKKQEK	37.5	1207.62	10	-0.5	403.547	18.45	2060000	1	9188	200716_dc_IP79_NormalLung-W6Ab_DDA-OTOT-HCD_25cmPepMap2uTT_145m_01.raw	2	2	P06748|NPM_HUMAN				0
HGGKYSREK	37.49	1060.54	9	-0.7	531.278	11.38	7170000	1	4287	200716_dc_IP79_NormalLung-W6Ab_DDA-OTOT-HCD_25cmPepMap2uTT_145m_01.raw	2	2	P30533|AMRP_HUMAN				0
HFELGGDKKRK	37.49	1313.72	11	-0.8	438.914	25.12	7850000	1	13996	200716_dc_IP79_NormalLung-W6Ab_DDA-OTOT-HCD_25cmPepMap2uTT_145m_01.raw	1	1	Q969Q0|RL36L_HUMAN:P83881|RL36A_HUMAN				1
HHPGIAEFPSRGK	37.49	1431.74	13	0.2	358.942	32.13	7560000	1	19059	200716_dc_IP79_NormalLung-W6Ab_DDA-OTOT-HCD_25cmPepMap2uTT_145m_01.raw	2	2	P02671|FIBA_HUMAN				0
RPLEM(+15.99)IEPRTL	37.49	1369.74	11	-1	457.586	52.39	95600000	1	33195	200716_dc_IP79_NormalLung-W6Ab_DDA-OTOT-HCD_25cmPepMap2uTT_145m_01.raw	2	2	P62249|RS16_HUMAN	Oxidation (M)	M5:Oxidation (M):1000.00		0
QPKQRGFRF	37.48	1162.64	9	0.2	388.553	32.18	24500000	1	19039	200716_dc_IP79_NormalLung-W6Ab_DDA-OTOT-HCD_25cmPepMap2uTT_145m_01.raw	1	1	P19838|NFKB1_HUMAN:Q00653|NFKB2_HUMAN				0
SPAGSIVHEL	37.47	1008.52	10	-1.4	505.269	56.98	21800000	1	36628	200716_dc_IP79_NormalLung-W6Ab_DDA-OTOT-HCD_25cmPepMap2uTT_145m_01.raw	1	1	O43776|SYNC_HUMAN				0
SPVDNTPSHQL	37.47	1193.57	11	-1.4	597.79	42.89	1150000	1	26709	200716_dc_IP79_NormalLung-W6Ab_DDA-OTOT-HCD_25cmPepMap2uTT_145m_01.raw	1	1	P46531|NOTC1_HUMAN				0
IVRDHWVHV	37.46	1159.62	9	-1.9	387.548	42.21	30900000	1	26136	200716_dc_IP79_NormalLung-W6Ab_DDA-OTOT-HCD_25cmPepMap2uTT_145m_01.raw	2	2	O75438|NDUB1_HUMAN				1
TSSTSYNRGDST	37.46	1274.54	12	-1.4	638.275	27.86	2860000	1	15994	200716_dc_IP79_NormalLung-W6Ab_DDA-OTOT-HCD_25cmPepMap2uTT_145m_01.raw	1	1	P02671|FIBA_HUMAN				1
TKKPKATPVK	37.45	1096.7	10	-2.1	366.572	14.84	25600000	1	6594	200716_dc_IP79_NormalLung-W6Ab_DDA-OTOT-HCD_25cmPepMap2uTT_145m_01.raw	2	2	P07305|H10_HUMAN				0
NATAVVRHM	37.45	997.513	9	-1.2	499.763	31.7	4260000	1	18729	200716_dc_IP79_NormalLung-W6Ab_DDA-OTOT-HCD_25cmPepMap2uTT_145m_01.raw	1	1	Q14012|KCC1A_HUMAN:Q8IU85|KCC1D_HUMAN				1
FGGPGTASRPS	37.44	1032.5	11	-1	517.256	35.09	54500000	1	21046	200716_dc_IP79_NormalLung-W6Ab_DDA-OTOT-HCD_25cmPepMap2uTT_145m_01.raw	1	1	P08670|VIME_HUMAN				1
FPQHLRHLL	37.43	1159.66	9	-1.4	387.56	48.65	12300000	1	30710	200716_dc_IP79_NormalLung-W6Ab_DDA-OTOT-HCD_25cmPepMap2uTT_145m_01.raw	1	1	P42226|STAT6_HUMAN				1
NPKIAVSKM	37.43	986.558	9	-1.7	494.286	35.04	2640000	1	21060	200716_dc_IP79_NormalLung-W6Ab_DDA-OTOT-HCD_25cmPepMap2uTT_145m_01.raw	1	1	Q14839|CHD4_HUMAN				0
KVKNIDLKFK	37.42	1231.77	10	-0.8	411.595	34.89	2970000	1	21021	200716_dc_IP79_NormalLung-W6Ab_DDA-OTOT-HCD_25cmPepMap2uTT_145m_01.raw	1	1	P06400|RB_HUMAN				0
HLDQEQQLK	37.42	1137.58	9	-1.1	569.795	29.44	2600000	1	17162	200716_dc_IP79_NormalLung-W6Ab_DDA-OTOT-HCD_25cmPepMap2uTT_145m_01.raw	1	1	Q14669|TRIPC_HUMAN				1
GGPGTASRP	37.42	798.398	9	-0.6	799.405	26.88	193000000	1	15227	200716_dc_IP79_NormalLung-W6Ab_DDA-OTOT-HCD_25cmPepMap2uTT_145m_01.raw	2	2	P08670|VIME_HUMAN				0
RPYEKGRLII	37.41	1243.74	10	-1.5	415.587	41.61	21600000	1	25704	200716_dc_IP79_NormalLung-W6Ab_DDA-OTOT-HCD_25cmPepMap2uTT_145m_01.raw	1	1	P31689|DNJA1_HUMAN				1
EEEEAKTVSA	37.41	1091.5	10	-0.2	546.756	30.77	20400000	1	18021	200716_dc_IP79_NormalLung-W6Ab_DDA-OTOT-HCD_25cmPepMap2uTT_145m_01.raw	1	1	Q8IVD9|NUDC3_HUMAN				1
HPSNVLHFF	37.41	1096.55	9	-0.8	549.279	64.76	20900000	1	42101	200716_dc_IP79_NormalLung-W6Ab_DDA-OTOT-HCD_25cmPepMap2uTT_145m_01.raw	1	1	P14866|HNRPL_HUMAN				1
HLPSWKAGTGR	37.38	1208.64	11	-1.3	403.887	35.09	5700000	1	21117	200716_dc_IP79_NormalLung-W6Ab_DDA-OTOT-HCD_25cmPepMap2uTT_145m_01.raw	1	1	P17026|ZNF22_HUMAN				1
TPSLVKSTSQLL	37.38	1272.73	12	-1.6	637.371	68.54	7340000	1	44747	200716_dc_IP79_NormalLung-W6Ab_DDA-OTOT-HCD_25cmPepMap2uTT_145m_01.raw	1	1	Q06055|AT5G2_HUMAN				1
NEATGGKYVP	37.37	1034.5	10	-0.4	518.259	39.84	10400000	1	24481	200716_dc_IP79_NormalLung-W6Ab_DDA-OTOT-HCD_25cmPepMap2uTT_145m_01.raw	1	1	P07437|TBB5_HUMAN:P68371|TBB4B_HUMAN				1
SQAGM(+15.99)TAPGTK	37.37	1063.5	11	-1.2	532.755	26	6870000	1	14621	200716_dc_IP79_NormalLung-W6Ab_DDA-OTOT-HCD_25cmPepMap2uTT_145m_01.raw	1	1	P51911|CNN1_HUMAN	Oxidation (M)	M5:Oxidation (M):1000.00		0
TGNKIRYNS	37.36	1051.54	9	-0.7	526.777	26.4	4580000	1	14914	200716_dc_IP79_NormalLung-W6Ab_DDA-OTOT-HCD_25cmPepMap2uTT_145m_01.raw	1	1	P62891|RL39_HUMAN:Q59GN2|R39L5_HUMAN				1
TPRHPLEGTHEL	37.36	1385.71	12	-0.7	462.909	34.84	1540000	1	20965	200716_dc_IP79_NormalLung-W6Ab_DDA-OTOT-HCD_25cmPepMap2uTT_145m_01.raw	1	1	Q8IWR0|Z3H7A_HUMAN				1
N(+.98)GLSLAALKK	37.36	1014.61	10	-0.6	508.311	54.46	7890000	1	34872	200716_dc_IP79_NormalLung-W6Ab_DDA-OTOT-HCD_25cmPepMap2uTT_145m_01.raw	1	1	P16401|H15_HUMAN	Deamidation (NQ)	N1:Deamidation (NQ):1000.00		0
HVNPVQALSEF	37.33	1239.62	11	-1.9	620.818	77.76	7860000	1	51494	200716_dc_IP79_NormalLung-W6Ab_DDA-OTOT-HCD_25cmPepMap2uTT_145m_01.raw	1	1	P35221|CTNA1_HUMAN				0
TKKPKATPVKK	37.33	1224.79	11	-0.7	613.403	12.91	10300000	1	5295	200716_dc_IP79_NormalLung-W6Ab_DDA-OTOT-HCD_25cmPepMap2uTT_145m_01.raw	2	2	P07305|H10_HUMAN				0
VFQYRLVEY	37.33	1215.63	9	-0.6	608.821	73.52	26900000	1	48183	200716_dc_IP79_NormalLung-W6Ab_DDA-OTOT-HCD_25cmPepMap2uTT_145m_01.raw	1	1	Q8TAD8|SNIP1_HUMAN				1
NPTNAEVLKVL	37.33	1196.68	11	-0.7	599.345	68.25	2540000	1	44683	200716_dc_IP79_NormalLung-W6Ab_DDA-OTOT-HCD_25cmPepMap2uTT_145m_01.raw	1	1	P60660|MYL6_HUMAN:P14649|MYL6B_HUMAN				0
LPFDHSRVIL	37.32	1195.67	10	-0.5	598.843	67.3	71900000	1	44359	200716_dc_IP79_NormalLung-W6Ab_DDA-OTOT-HCD_25cmPepMap2uTT_145m_01.raw	4	4	P29350|PTN6_HUMAN				0
STGGVKKPH	37.32	909.503	9	-0.3	455.759	13.78	501000	1	6017	200716_dc_IP79_NormalLung-W6Ab_DDA-OTOT-HCD_25cmPepMap2uTT_145m_01.raw	1	1	P84243|H33_HUMAN				0
TKAVAASKER	37.32	1059.6	10	1.1	354.209	14.12	2930000	1	6197	200716_dc_IP79_NormalLung-W6Ab_DDA-OTOT-HCD_25cmPepMap2uTT_145m_01.raw	2	2	P16403|H12_HUMAN:P10412|H14_HUMAN:P16402|H13_HUMAN:P16401|H15_HUMAN				0
KTRIIDVVY	37.31	1105.65	9	-1.9	1106.65	53.72	647000000	1	34373	200716_dc_IP79_NormalLung-W6Ab_DDA-OTOT-HCD_25cmPepMap2uTT_145m_01.raw	3	3	P62241|RS8_HUMAN				1
RVKGPGISKF	37.3	1087.65	10	-1.6	363.557	32.54	0	1	19324	200716_dc_IP79_NormalLung-W6Ab_DDA-OTOT-HCD_25cmPepMap2uTT_145m_01.raw	0	0	P49961|ENTP1_HUMAN				1
E(-18.01)LPSGKKYLR	37.3	1171.67	10	0.7	391.565	34.94	7090000	1	20954	200716_dc_IP79_NormalLung-W6Ab_DDA-OTOT-HCD_25cmPepMap2uTT_145m_01.raw	1	1	P30041|PRDX6_HUMAN	Pyro-glu from E	E1:Pyro-glu from E:1000.00		0
TFLRPPKVK	37.3	1084.68	9	-0.9	362.565	38.58	18300000	1	23636	200716_dc_IP79_NormalLung-W6Ab_DDA-OTOT-HCD_25cmPepMap2uTT_145m_01.raw	1	1	O75937|DNJC8_HUMAN				0
TRLGNDFHTNK	37.29	1301.65	11	-0.7	434.889	29.34	30300000	1	17016	200716_dc_IP79_NormalLung-W6Ab_DDA-OTOT-HCD_25cmPepMap2uTT_145m_01.raw	2	2	P08708|RS17_HUMAN				1
KVQFDTKPLK	37.29	1202.7	10	-3.8	401.906	35.89	0	1	21705	200716_dc_IP79_NormalLung-W6Ab_DDA-OTOT-HCD_25cmPepMap2uTT_145m_01.raw	0	0	Q9P2E3|ZNFX1_HUMAN				0
EEQAAQHKA	37.29	1010.48	9	-1.1	506.246	13.06	3040000	1	5435	200716_dc_IP79_NormalLung-W6Ab_DDA-OTOT-HCD_25cmPepMap2uTT_145m_01.raw	2	2	Q15149|PLEC_HUMAN				0
TDYISKVKE	37.28	1081.57	9	0	541.79	39.27	63400000	1	24040	200716_dc_IP79_NormalLung-W6Ab_DDA-OTOT-HCD_25cmPepMap2uTT_145m_01.raw	2	2	O75915|PRAF3_HUMAN				1
VPQTAVKQF	37.28	1016.57	9	-0.7	509.29	44.76	5630000	1	28036	200716_dc_IP79_NormalLung-W6Ab_DDA-OTOT-HCD_25cmPepMap2uTT_145m_01.raw	1	1	Q13887|KLF5_HUMAN				0
SSVPGVRLL	37.27	926.555	9	-0.4	464.284	64.38	182000000	1	41799	200716_dc_IP79_NormalLung-W6Ab_DDA-OTOT-HCD_25cmPepMap2uTT_145m_01.raw	2	2	P08670|VIME_HUMAN				1
TTDLFGRDLSY	37.26	1286.61	11	-0.9	644.314	77.91	2660000	1	51307	200716_dc_IP79_NormalLung-W6Ab_DDA-OTOT-HCD_25cmPepMap2uTT_145m_01.raw	1	1	P52597|HNRPF_HUMAN				1
DGSRLIKVHLDK	37.26	1379.79	12	-0.8	460.936	39.75	1240000	1	24504	200716_dc_IP79_NormalLung-W6Ab_DDA-OTOT-HCD_25cmPepMap2uTT_145m_01.raw	1	1	P62081|RS7_HUMAN				0
KSHPPPPEK	37.25	1015.54	9	-1.1	508.779	15.18	41700000	1	6819	200716_dc_IP79_NormalLung-W6Ab_DDA-OTOT-HCD_25cmPepMap2uTT_145m_01.raw	1	1	A0A0U1RRE5|NBDY_HUMAN				1
TEEEKNFKA	37.24	1094.52	9	-1.2	548.269	28.45	49700000	1	16378	200716_dc_IP79_NormalLung-W6Ab_DDA-OTOT-HCD_25cmPepMap2uTT_145m_01.raw	2	2	P26373|RL13_HUMAN				1
VPQPSHPLKSF	37.24	1235.67	11	-2.1	412.895	44.42	1970000	1	27838	200716_dc_IP79_NormalLung-W6Ab_DDA-OTOT-HCD_25cmPepMap2uTT_145m_01.raw	1	1	Q86T65|DAAM2_HUMAN				0
IPPPPPPVGF	37.24	1016.57	10	-1.4	509.291	80.18	47300000	1	52650	200716_dc_IP79_NormalLung-W6Ab_DDA-OTOT-HCD_25cmPepMap2uTT_145m_01.raw	1	1	Q9Y6W5|WASF2_HUMAN				1
GASQAGM(+15.99)TAPGTK	37.23	1191.56	13	-1.5	596.784	26.94	4480000	1	15312	200716_dc_IP79_NormalLung-W6Ab_DDA-OTOT-HCD_25cmPepMap2uTT_145m_01.raw	1	1	P51911|CNN1_HUMAN	Oxidation (M)	M7:Oxidation (M):1000.00		0
RVDDFKKAF	37.23	1124.6	9	-1.5	375.873	42.01	1960000	1	26038	200716_dc_IP79_NormalLung-W6Ab_DDA-OTOT-HCD_25cmPepMap2uTT_145m_01.raw	1	1	Q6NZI2|CAVN1_HUMAN				0
AELEKHMAA	37.22	998.486	9	-0.3	500.25	30.18	5840000	1	17645	200716_dc_IP79_NormalLung-W6Ab_DDA-OTOT-HCD_25cmPepMap2uTT_145m_01.raw	1	1	Q9P2E9|RRBP1_HUMAN				1
RPGAHLTVKKI	37.21	1218.76	11	-1.2	407.259	29.14	8210000	1	16909	200716_dc_IP79_NormalLung-W6Ab_DDA-OTOT-HCD_25cmPepMap2uTT_145m_01.raw	1	1	P09651|ROA1_HUMAN:Q32P51|RA1L2_HUMAN				0
HHKPGLGEGTP	37.2	1128.57	11	-1.3	565.29	27.62	6390000	1	15815	200716_dc_IP79_NormalLung-W6Ab_DDA-OTOT-HCD_25cmPepMap2uTT_145m_01.raw	1	1	P06702|S10A9_HUMAN				0
APGTDLAKIL	37.2	997.581	10	-1.3	499.797	72.73	6430000	1	47681	200716_dc_IP79_NormalLung-W6Ab_DDA-OTOT-HCD_25cmPepMap2uTT_145m_01.raw	1	1	P08727|K1C19_HUMAN				0
AEQGVQKPAA	37.2	997.519	10	-0.2	499.767	28.8	5230000	1	16631	200716_dc_IP79_NormalLung-W6Ab_DDA-OTOT-HCD_25cmPepMap2uTT_145m_01.raw	1	1	Q9Y6J0|CABIN_HUMAN				1
APTGSGKTI	37.19	830.45	9	-0.8	416.232	28.45	15500000	1	16383	200716_dc_IP79_NormalLung-W6Ab_DDA-OTOT-HCD_25cmPepMap2uTT_145m_01.raw	1	1	O75643|U520_HUMAN				1
APTGSGKTL	37.19	830.45	9	-0.8	416.232	28.45	15500000	1	16383	200716_dc_IP79_NormalLung-W6Ab_DDA-OTOT-HCD_25cmPepMap2uTT_145m_01.raw	1	1	Q8N8A6|DDX51_HUMAN:Q9Y2R4|DDX52_HUMAN				1
KPKKAAGGATPK	37.18	1152.7	12	0.6	385.24	11.53	660000	1	4381	200716_dc_IP79_NormalLung-W6Ab_DDA-OTOT-HCD_25cmPepMap2uTT_145m_01.raw	2	2	P16403|H12_HUMAN				0
GLIKLVSKHR	37.17	1149.73	10	-0.2	384.252	32.86	3260000	1	19541	200716_dc_IP79_NormalLung-W6Ab_DDA-OTOT-HCD_25cmPepMap2uTT_145m_01.raw	1	1	P62851|RS25_HUMAN				0
KVVVSPTK	37.16	856.538	8	-1.3	429.276	26.3	44600000	1	14841	200716_dc_IP79_NormalLung-W6Ab_DDA-OTOT-HCD_25cmPepMap2uTT_145m_01.raw	1	1	P19338|NUCL_HUMAN				0
STLLRIIYK	37.16	1105.69	9	-1.1	553.85	60.05	43100000	1	38980	200716_dc_IP79_NormalLung-W6Ab_DDA-OTOT-HCD_25cmPepMap2uTT_145m_01.raw	2	2	P24530|EDNRB_HUMAN				0
KTKRTIQFV	37.16	1119.68	9	-1.3	560.845	33	21500000	1	19593	200716_dc_IP79_NormalLung-W6Ab_DDA-OTOT-HCD_25cmPepMap2uTT_145m_01.raw	1	1	Q71U36|TBA1A_HUMAN:Q9BQE3|TBA1C_HUMAN:P0DPH8|TBA3D_HUMAN:P0DPH7|TBA3C_HUMAN:Q6PEY2|TBA3E_HUMAN:Q9NY65|TBA8_HUMAN				1
TSSFGGLGGGSVR	37.16	1180.58	13	-1.3	591.298	50.71	30300000	1	32230	200716_dc_IP79_NormalLung-W6Ab_DDA-OTOT-HCD_25cmPepMap2uTT_145m_01.raw	1	1	P08727|K1C19_HUMAN				0
SLGSALRPSTSR	37.14	1230.67	12	-1.5	616.34	38.92	147000000	1	23753	200716_dc_IP79_NormalLung-W6Ab_DDA-OTOT-HCD_25cmPepMap2uTT_145m_01.raw	4	4	P08670|VIME_HUMAN				1
LEKAKAKELATK	37.13	1328.8	12	-1.8	443.941	25.51	1330000	1	14266	200716_dc_IP79_NormalLung-W6Ab_DDA-OTOT-HCD_25cmPepMap2uTT_145m_01.raw	1	1	P62424|RL7A_HUMAN				0
KYSTLTARVK	37.13	1165.68	10	-1.2	389.567	29.69	6370000	1	17304	200716_dc_IP79_NormalLung-W6Ab_DDA-OTOT-HCD_25cmPepMap2uTT_145m_01.raw	1	1	Q9NZU5|LMCD1_HUMAN				0
EERVQAVVA	37.12	999.535	9	-1.6	1000.54	41.42	230000000	1	25607	200716_dc_IP79_NormalLung-W6Ab_DDA-OTOT-HCD_25cmPepMap2uTT_145m_01.raw	2	2	Q01082|SPTB2_HUMAN				1
TPLDFPSKKR	37.11	1187.67	10	-0.8	396.896	35.48	1970000	1	21418	200716_dc_IP79_NormalLung-W6Ab_DDA-OTOT-HCD_25cmPepMap2uTT_145m_01.raw	1	1	Q15637|SF01_HUMAN				0
AEQKLRIQA	37.11	1055.61	9	-1.2	528.811	34.55	11300000	1	20704	200716_dc_IP79_NormalLung-W6Ab_DDA-OTOT-HCD_25cmPepMap2uTT_145m_01.raw	2	2	Q9BQG0|MBB1A_HUMAN				1
TPGNFFHVL	37.11	1030.52	9	-0.7	516.269	78.4	2270000	1	51710	200716_dc_IP79_NormalLung-W6Ab_DDA-OTOT-HCD_25cmPepMap2uTT_145m_01.raw	1	1	Q02218|ODO1_HUMAN				0
TTAATTAATAAQ	37.1	1077.53	12	-0.8	539.772	35.97	2650000	1	21750	200716_dc_IP79_NormalLung-W6Ab_DDA-OTOT-HCD_25cmPepMap2uTT_145m_01.raw	1	1	P37108|SRP14_HUMAN				0
KVLGVQRPLL	37.1	1121.73	10	-0.1	561.871	51.99	41300000	1	33083	200716_dc_IP79_NormalLung-W6Ab_DDA-OTOT-HCD_25cmPepMap2uTT_145m_01.raw	2	2	Q96A65|EXOC4_HUMAN				1
SLPLVDTHSKRT	37.09	1352.74	12	-1	451.921	36.42	19000000	1	21990	200716_dc_IP79_NormalLung-W6Ab_DDA-OTOT-HCD_25cmPepMap2uTT_145m_01.raw	1	1	P08670|VIME_HUMAN				1
VPNISVHLL	37.08	990.586	9	-0.5	496.3	76.28	2750000	1	49861	200716_dc_IP79_NormalLung-W6Ab_DDA-OTOT-HCD_25cmPepMap2uTT_145m_01.raw	1	1	Q7Z392|TPC11_HUMAN				0
YGEVTNDFVM(+15.99)LK	37.08	1430.68	12	0	716.345	70.37	1180000	1	46202	200716_dc_IP79_NormalLung-W6Ab_DDA-OTOT-HCD_25cmPepMap2uTT_145m_01.raw	1	1	P39023|RL3_HUMAN	Oxidation (M)	M10:Oxidation (M):1000.00		0
TVINQTQKENL	37.07	1286.68	11	-0.8	644.348	43.14	63700000	1	26800	200716_dc_IP79_NormalLung-W6Ab_DDA-OTOT-HCD_25cmPepMap2uTT_145m_01.raw	1	1	P42766|RL35_HUMAN				1
KTKTEQFQARK	37.07	1363.76	11	-1.5	455.592	20.85	7180000	1	11090	200716_dc_IP79_NormalLung-W6Ab_DDA-OTOT-HCD_25cmPepMap2uTT_145m_01.raw	1	1	Q9H501|ESF1_HUMAN				0
MPKVKM(+15.99)PKF	37.06	1120.61	9	-1.9	374.544	39.51	77500000	1	24108	200716_dc_IP79_NormalLung-W6Ab_DDA-OTOT-HCD_25cmPepMap2uTT_145m_01.raw	2	2	Q09666|AHNK_HUMAN	Oxidation (M)	M6:Oxidation (M):61.30		0
KTAM(+15.99)AAAKAPTK	37.05	1203.66	12	-1.5	402.228	20.51	3140000	1	10695	200716_dc_IP79_NormalLung-W6Ab_DDA-OTOT-HCD_25cmPepMap2uTT_145m_01.raw	1	1	P83731|RL24_HUMAN	Oxidation (M)	M4:Oxidation (M):1000.00		0
SLVSKGTLVQT	37.05	1131.65	11	-0.7	566.832	51.11	121000000	1	32446	200716_dc_IP79_NormalLung-W6Ab_DDA-OTOT-HCD_25cmPepMap2uTT_145m_01.raw	2	2	P16403|H12_HUMAN:P10412|H14_HUMAN:P16402|H13_HUMAN:P16401|H15_HUMAN:Q02539|H11_HUMAN				1
KVHAPGLNL	37.04	947.555	9	-1.3	474.784	46.09	4070000	1	28988	200716_dc_IP79_NormalLung-W6Ab_DDA-OTOT-HCD_25cmPepMap2uTT_145m_01.raw	1	1	Q09666|AHNK_HUMAN				1
SVKNDHSAYK	37.04	1147.56	10	-0.8	383.528	17.47	964000	1	8551	200716_dc_IP79_NormalLung-W6Ab_DDA-OTOT-HCD_25cmPepMap2uTT_145m_01.raw	2	2	Q96F07|CYFP2_HUMAN:Q7L576|CYFP1_HUMAN				1
FPHLVHAEL	37.04	1061.57	9	-1.4	531.789	59.11	12300000	1	38188	200716_dc_IP79_NormalLung-W6Ab_DDA-OTOT-HCD_25cmPepMap2uTT_145m_01.raw	2	2	Q8IXI1|MIRO2_HUMAN				1
RPHPKPKQF	37.03	1133.65	9	-1.9	378.889	25.22	8960000	1	14035	200716_dc_IP79_NormalLung-W6Ab_DDA-OTOT-HCD_25cmPepMap2uTT_145m_01.raw	1	1	O95786|DDX58_HUMAN				1
SVAFKKTKK	37.03	1035.64	9	-1.7	518.828	14.51	4000000	1	6449	200716_dc_IP79_NormalLung-W6Ab_DDA-OTOT-HCD_25cmPepMap2uTT_145m_01.raw	1	1	P07305|H10_HUMAN				0
KQKVENLFNEK	37.03	1375.75	11	-1.3	459.589	36.47	1980000	1	22165	200716_dc_IP79_NormalLung-W6Ab_DDA-OTOT-HCD_25cmPepMap2uTT_145m_01.raw	1	1	P78347|GTF2I_HUMAN				0
HLAGKTEQAK	37.02	1081.59	10	-1.9	361.536	15.76	2130000	1	7345	200716_dc_IP79_NormalLung-W6Ab_DDA-OTOT-HCD_25cmPepMap2uTT_145m_01.raw	2	2	Q13442|HAP28_HUMAN				0
VDLEPTVIDEVR	37.02	1383.72	12	-2	692.868	74.5	8530000	1	48871	200716_dc_IP79_NormalLung-W6Ab_DDA-OTOT-HCD_25cmPepMap2uTT_145m_01.raw	1	1	P68363|TBA1B_HUMAN:Q71U36|TBA1A_HUMAN:Q9BQE3|TBA1C_HUMAN				1
LPQGEKVQAM(+15.99)	37.01	1115.56	10	-1.3	558.789	35.04	9110000	1	20880	200716_dc_IP79_NormalLung-W6Ab_DDA-OTOT-HCD_25cmPepMap2uTT_145m_01.raw	1	1	P15104|GLNA_HUMAN	Oxidation (M)	M10:Oxidation (M):1000.00		0
HNHHAHNY	37	1028.43	8	0	515.223	12.31	639000	1	4935	200716_dc_IP79_NormalLung-W6Ab_DDA-OTOT-HCD_25cmPepMap2uTT_145m_01.raw	1	1	P51911|CNN1_HUMAN				0
RVQDLEQKM(+15.99)K	37	1289.68	10	-1.6	430.899	26.3	3510000	1	14880	200716_dc_IP79_NormalLung-W6Ab_DDA-OTOT-HCD_25cmPepMap2uTT_145m_01.raw	1	1	P40763|STAT3_HUMAN	Oxidation (M)	M9:Oxidation (M):1000.00		0
HDSFLKAVPS	37	1099.57	10	-1.5	550.79	49.57	10600000	1	31392	200716_dc_IP79_NormalLung-W6Ab_DDA-OTOT-HCD_25cmPepMap2uTT_145m_01.raw	2	2	P31949|S10AB_HUMAN				0
TDQVM(+15.99)QNPRVLA	37	1386.69	12	-1.4	694.352	45.86	1560000	1	28789	200716_dc_IP79_NormalLung-W6Ab_DDA-OTOT-HCD_25cmPepMap2uTT_145m_01.raw	1	1	Q99733|NP1L4_HUMAN	Oxidation (M)	M5:Oxidation (M):1000.00		0
RLKDIGPEVVK	37	1252.75	11	0.6	418.591	39.6	6910000	1	24326	200716_dc_IP79_NormalLung-W6Ab_DDA-OTOT-HCD_25cmPepMap2uTT_145m_01.raw	1	1	P51659|DHB4_HUMAN				1
TGGVKKPH	36.99	822.471	8	-0.3	412.243	12.96	2060000	1	5331	200716_dc_IP79_NormalLung-W6Ab_DDA-OTOT-HCD_25cmPepMap2uTT_145m_01.raw	2	2	Q71DI3|H32_HUMAN:P68431|H31_HUMAN:Q16695|H31T_HUMAN:P84243|H33_HUMAN				0
GPKFKMPEM(+15.99)	36.99	1079.51	9	-0.6	540.764	43.04	4900000	1	26787	200716_dc_IP79_NormalLung-W6Ab_DDA-OTOT-HCD_25cmPepMap2uTT_145m_01.raw	1	1	Q09666|AHNK_HUMAN	Oxidation (M)	M9:Oxidation (M):65.81		0
HGYGGRFG	36.98	849.388	8	-0.8	425.701	30.57	13400000	1	17885	200716_dc_IP79_NormalLung-W6Ab_DDA-OTOT-HCD_25cmPepMap2uTT_145m_01.raw	1	1	P14317|HCLS1_HUMAN				0
HM(+15.99)SGPKIKAK	36.97	1111.62	10	-0.6	371.546	16.93	2950000	1	8267	200716_dc_IP79_NormalLung-W6Ab_DDA-OTOT-HCD_25cmPepMap2uTT_145m_01.raw	1	1	Q09666|AHNK_HUMAN	Oxidation (M)	M2:Oxidation (M):1000.00		0
HPIQGHRVEV	36.97	1170.63	10	-1.1	391.215	28.9	18000000	1	16793	200716_dc_IP79_NormalLung-W6Ab_DDA-OTOT-HCD_25cmPepMap2uTT_145m_01.raw	1	1	Q13151|ROA0_HUMAN				1
SVTEHPSPSPLLS	36.97	1349.68	13	-1	675.848	54.9	2970000	1	35253	200716_dc_IP79_NormalLung-W6Ab_DDA-OTOT-HCD_25cmPepMap2uTT_145m_01.raw	1	1	P07910|HNRPC_HUMAN				0
VPRKPVKHTA	36.96	1131.69	10	-1.3	378.236	16.83	5620000	1	8024	200716_dc_IP79_NormalLung-W6Ab_DDA-OTOT-HCD_25cmPepMap2uTT_145m_01.raw	1	1	P21333|FLNA_HUMAN				1
QPADIGYKIKTL	36.96	1345.76	12	-2	449.593	56.48	2000000	1	36381	200716_dc_IP79_NormalLung-W6Ab_DDA-OTOT-HCD_25cmPepMap2uTT_145m_01.raw	1	1	P20591|MX1_HUMAN				0
TYNTTSAVTVK	36.95	1183.61	11	-1.6	592.811	40.63	21500000	1	25048	200716_dc_IP79_NormalLung-W6Ab_DDA-OTOT-HCD_25cmPepMap2uTT_145m_01.raw	1	1	P61513|RL37A_HUMAN				0
VPDTSRIYVAL	36.95	1232.68	11	-1.5	617.345	73.62	11100000	1	48260	200716_dc_IP79_NormalLung-W6Ab_DDA-OTOT-HCD_25cmPepMap2uTT_145m_01.raw	1	1	Q9UBK9|UXT_HUMAN				1
AESPASRQAAA	36.94	1057.52	11	-0.5	529.765	27.23	5490000	1	15533	200716_dc_IP79_NormalLung-W6Ab_DDA-OTOT-HCD_25cmPepMap2uTT_145m_01.raw	1	1	Q86YP4|P66A_HUMAN				1
LPAEFPDKVF	36.93	1161.61	10	-0.8	581.81	79.14	1960000	1	52119	200716_dc_IP79_NormalLung-W6Ab_DDA-OTOT-HCD_25cmPepMap2uTT_145m_01.raw	1	1	O43929|ORC4_HUMAN				0
M(+15.99)FGGPGTASRP	36.93	1092.5	11	-1.3	547.258	40.39	9870000	1	24601	200716_dc_IP79_NormalLung-W6Ab_DDA-OTOT-HCD_25cmPepMap2uTT_145m_01.raw	1	1	P08670|VIME_HUMAN	Oxidation (M)	M1:Oxidation (M):1000.00		0
SVQETVLPIKK	36.93	1240.74	11	-7.7	621.372	45.57	3790000	1	28596	200716_dc_IP79_NormalLung-W6Ab_DDA-OTOT-HCD_25cmPepMap2uTT_145m_01.raw	1	1	P51608|MECP2_HUMAN				0
APYMRSM(+15.99)M(+15.99)QSL	36.91	1345.58	11	-0.7	673.798	46.09	4890000	1	28986	200716_dc_IP79_NormalLung-W6Ab_DDA-OTOT-HCD_25cmPepMap2uTT_145m_01.raw	1	1	Q9UMX0|UBQL1_HUMAN:Q9UHD9|UBQL2_HUMAN	Oxidation (M)	M7:Oxidation (M):5.08;M8:Oxidation (M):14.77		0
NPKILKQSM(+15.99)	36.9	1073.59	9	-1.7	537.802	28.6	7210000	1	16520	200716_dc_IP79_NormalLung-W6Ab_DDA-OTOT-HCD_25cmPepMap2uTT_145m_01.raw	2	2	P05412|JUN_HUMAN	Oxidation (M)	M9:Oxidation (M):1000.00		0
SGGNYRDNYDN	36.9	1273.5	11	-1.2	637.755	32.04	1250000	1	19016	200716_dc_IP79_NormalLung-W6Ab_DDA-OTOT-HCD_25cmPepMap2uTT_145m_01.raw	1	1	P98179|RBM3_HUMAN				1
TFNPGAGLPTDK	36.9	1216.61	12	-1.8	609.311	55.84	23000000	1	35900	200716_dc_IP79_NormalLung-W6Ab_DDA-OTOT-HCD_25cmPepMap2uTT_145m_01.raw	1	1	P09661|RU2A_HUMAN				1
AAATVTKK	36.89	788.476	8	-0.9	395.245	12.86	419000	1	5300	200716_dc_IP79_NormalLung-W6Ab_DDA-OTOT-HCD_25cmPepMap2uTT_145m_01.raw	1	1	P16403|H12_HUMAN				0
HQGVM(+15.99)VGMGQK	36.88	1186.56	11	-0.6	594.286	30.47	2440000	1	17866	200716_dc_IP79_NormalLung-W6Ab_DDA-OTOT-HCD_25cmPepMap2uTT_145m_01.raw	2	2	P60709|ACTB_HUMAN:P63261|ACTG_HUMAN:P68032|ACTC_HUMAN:P62736|ACTA_HUMAN:P68133|ACTS_HUMAN:P63267|ACTH_HUMAN:Q562R1|ACTBL_HUMAN	Oxidation (M)	M5:Oxidation (M):40.63		0
QGKIVDLVKELDR	36.88	1511.87	13	-0.9	504.962	66.12	1440000	1	43194	200716_dc_IP79_NormalLung-W6Ab_DDA-OTOT-HCD_25cmPepMap2uTT_145m_01.raw	1	1	P01009|A1AT_HUMAN				0
SGSFKLNK	36.87	879.481	8	0	440.748	29.14	99600000	1	16865	200716_dc_IP79_NormalLung-W6Ab_DDA-OTOT-HCD_25cmPepMap2uTT_145m_01.raw	2	2	P16403|H12_HUMAN:P10412|H14_HUMAN:P16402|H13_HUMAN:P16401|H15_HUMAN:Q02539|H11_HUMAN				0
RPNTYIYTKAL	36.87	1338.73	11	-1.1	447.25	50.07	7780000	1	31763	200716_dc_IP79_NormalLung-W6Ab_DDA-OTOT-HCD_25cmPepMap2uTT_145m_01.raw	2	2	Q8WVX9|FACR1_HUMAN				0
TNTKESSSHHPG	36.86	1280.57	12	-0.3	427.865	13.35	691000	1	5645	200716_dc_IP79_NormalLung-W6Ab_DDA-OTOT-HCD_25cmPepMap2uTT_145m_01.raw	1	1	P02671|FIBA_HUMAN				0
TGNSILGR	36.85	816.445	8	-0.6	409.23	38.36	0	1	23464	200716_dc_IP79_NormalLung-W6Ab_DDA-OTOT-HCD_25cmPepMap2uTT_145m_01.raw	0	0	Q9NUV9|GIMA4_HUMAN:Q6P9H5|GIMA6_HUMAN				0
APYFKGTAVV	36.84	1051.57	10	-0.5	526.792	57.47	1990000	1	37061	200716_dc_IP79_NormalLung-W6Ab_DDA-OTOT-HCD_25cmPepMap2uTT_145m_01.raw	1	1	P30048|PRDX3_HUMAN				0
M(+15.99)PKFNFSKPK	36.84	1238.65	10	-0.8	413.89	36.52	20800000	1	22479	200716_dc_IP79_NormalLung-W6Ab_DDA-OTOT-HCD_25cmPepMap2uTT_145m_01.raw	2	2	Q09666|AHNK_HUMAN	Oxidation (M)	M1:Oxidation (M):1000.00		0
TLVTYVPVTTFK	36.84	1367.77	12	-1.3	684.891	76.67	102000000	1	50620	200716_dc_IP79_NormalLung-W6Ab_DDA-OTOT-HCD_25cmPepMap2uTT_145m_01.raw	1	1	P62899|RL31_HUMAN				1
APHLSKVSM(+15.99)	36.84	984.506	9	-0.8	493.26	29.05	8340000	1	16806	200716_dc_IP79_NormalLung-W6Ab_DDA-OTOT-HCD_25cmPepMap2uTT_145m_01.raw	1	1	Q8N392|RHG18_HUMAN	Oxidation (M)	M9:Oxidation (M):1000.00		0
HYKGQQIGK	36.84	1057.57	9	-0.6	529.79	22.7	100000000	1	12282	200716_dc_IP79_NormalLung-W6Ab_DDA-OTOT-HCD_25cmPepMap2uTT_145m_01.raw	2	2	P61254|RL26_HUMAN:Q9UNX3|RL26L_HUMAN				1
HESGHAIIA	36.83	933.467	9	-0.8	934.473	28.9	78700000	1	16720	200716_dc_IP79_NormalLung-W6Ab_DDA-OTOT-HCD_25cmPepMap2uTT_145m_01.raw	1	1	Q96TA2|YMEL1_HUMAN				1
QEQSFVIRA	36.83	1076.56	9	-0.1	1077.57	53.67	272000000	1	34335	200716_dc_IP79_NormalLung-W6Ab_DDA-OTOT-HCD_25cmPepMap2uTT_145m_01.raw	2	2	P05107|ITB2_HUMAN				1
KAKKPAAAAGAKK	36.82	1238.78	13	-1.2	413.934	11.23	1030000	1	4152	200716_dc_IP79_NormalLung-W6Ab_DDA-OTOT-HCD_25cmPepMap2uTT_145m_01.raw	2	2	P10412|H14_HUMAN				0
VPFKRLSVVF	36.82	1190.72	10	-0.4	596.366	68.89	8680000	1	45086	200716_dc_IP79_NormalLung-W6Ab_DDA-OTOT-HCD_25cmPepMap2uTT_145m_01.raw	2	2	Q0VGL1|LTOR4_HUMAN				0
HYHKEYRQ	36.81	1159.55	8	-0.2	387.525	15.71	11100000	1	7402	200716_dc_IP79_NormalLung-W6Ab_DDA-OTOT-HCD_25cmPepMap2uTT_145m_01.raw	2	2	P18124|RL7_HUMAN				0
STSAPAAKPK	36.81	956.529	10	-1.4	479.271	21.49	2290000	1	11247	200716_dc_IP79_NormalLung-W6Ab_DDA-OTOT-HCD_25cmPepMap2uTT_145m_01.raw	1	1	P07305|H10_HUMAN				0
HFGGGKTTGF	36.8	1007.48	10	-1.2	504.748	35.93	6200000	1	21703	200716_dc_IP79_NormalLung-W6Ab_DDA-OTOT-HCD_25cmPepMap2uTT_145m_01.raw	1	1	P62847|RS24_HUMAN				1
AERYDDMAA	36.8	1040.42	9	-1.8	1041.43	41.12	70600000	1	25430	200716_dc_IP79_NormalLung-W6Ab_DDA-OTOT-HCD_25cmPepMap2uTT_145m_01.raw	2	2	P63104|1433Z_HUMAN:P31946|1433B_HUMAN:P61981|1433G_HUMAN				1
AAAVPRAAF	36.8	872.487	9	-2.6	873.492	48.65	50500000	1	30794	200716_dc_IP79_NormalLung-W6Ab_DDA-OTOT-HCD_25cmPepMap2uTT_145m_01.raw	2	2	P30040|ERP29_HUMAN				1
SGNFGGSRNM(+15.99)GGP	36.79	1252.53	13	-1	627.269	32.23	2310000	1	19088	200716_dc_IP79_NormalLung-W6Ab_DDA-OTOT-HCD_25cmPepMap2uTT_145m_01.raw	1	1	P22626|ROA2_HUMAN	Oxidation (M)	M10:Oxidation (M):1000.00		0
TPNKEKTEAKR	36.78	1300.71	11	-1.2	434.577	12.21	153000	1	4906	200716_dc_IP79_NormalLung-W6Ab_DDA-OTOT-HCD_25cmPepMap2uTT_145m_01.raw	1	1	P41218|MNDA_HUMAN				0
HYDAVEAELK	36.78	1173.57	10	-1.8	587.789	43.97	4380000	1	27442	200716_dc_IP79_NormalLung-W6Ab_DDA-OTOT-HCD_25cmPepMap2uTT_145m_01.raw	1	1	Q14320|FA50A_HUMAN:Q9Y247|FA50B_HUMAN				0
SDNQLQEGKNV	36.77	1230.58	11	-1.5	616.298	35.38	2210000	1	21372	200716_dc_IP79_NormalLung-W6Ab_DDA-OTOT-HCD_25cmPepMap2uTT_145m_01.raw	1	1	P37802|TAGL2_HUMAN				1
TGSHKERF	36.77	960.478	8	-0.8	481.246	16.93	1070000	1	8177	200716_dc_IP79_NormalLung-W6Ab_DDA-OTOT-HCD_25cmPepMap2uTT_145m_01.raw	1	1	Q9BW30|TPPP3_HUMAN:O94811|TPPP_HUMAN				0
TGASGSFK	36.77	753.366	8	-1.1	754.372	26.69	1290000000	1	15081	200716_dc_IP79_NormalLung-W6Ab_DDA-OTOT-HCD_25cmPepMap2uTT_145m_01.raw	2	2	P16403|H12_HUMAN:P10412|H14_HUMAN:P16402|H13_HUMAN:P16401|H15_HUMAN:Q02539|H11_HUMAN:P22492|H1T_HUMAN				0
VPHPKKPGHIL	36.77	1221.73	11	-2.3	408.251	31.16	22500000	1	18243	200716_dc_IP79_NormalLung-W6Ab_DDA-OTOT-HCD_25cmPepMap2uTT_145m_01.raw	1	1	P32455|GBP1_HUMAN				0
SGEAKPKV	36.77	814.455	8	-0.3	408.235	23.91	4210000	1	13069	200716_dc_IP79_NormalLung-W6Ab_DDA-OTOT-HCD_25cmPepMap2uTT_145m_01.raw	1	1	P16403|H12_HUMAN				0
RPKEYTVRF	36.76	1194.65	9	-1.1	399.224	38.46	15400000	1	23319	200716_dc_IP79_NormalLung-W6Ab_DDA-OTOT-HCD_25cmPepMap2uTT_145m_01.raw	1	1	Q8NE71|ABCF1_HUMAN				1
HRHPDEAAF	36.76	1078.49	9	-1.2	540.254	28.9	40100000	1	16705	200716_dc_IP79_NormalLung-W6Ab_DDA-OTOT-HCD_25cmPepMap2uTT_145m_01.raw	2	2	P02671|FIBA_HUMAN				1
MPYASKGLYL	36.75	1141.58	10	-0.9	571.799	68.75	0	1	45031	200716_dc_IP79_NormalLung-W6Ab_DDA-OTOT-HCD_25cmPepMap2uTT_145m_01.raw	0	0	P04275|VWF_HUMAN				0
STESLQANVQR	36.75	1231.62	11	-0.1	616.815	39.07	6330000	1	23948	200716_dc_IP79_NormalLung-W6Ab_DDA-OTOT-HCD_25cmPepMap2uTT_145m_01.raw	1	1	P26373|RL13_HUMAN				1
ASTASHRPIK	36.75	1066.59	10	0.6	356.537	17.52	629000	1	8582	200716_dc_IP79_NormalLung-W6Ab_DDA-OTOT-HCD_25cmPepMap2uTT_145m_01.raw	1	1	P41236|IPP2_HUMAN:Q6NXS1|IPP2B_HUMAN				0
APKISM(+15.99)PDFDL	36.74	1248.61	11	-2.2	625.309	70.55	0	1	46306	200716_dc_IP79_NormalLung-W6Ab_DDA-OTOT-HCD_25cmPepMap2uTT_145m_01.raw	0	0	Q09666|AHNK_HUMAN	Oxidation (M)	M6:Oxidation (M):1000.00		0
AEM(+15.99)ELQAKLTA	36.74	1219.61	11	-1.2	610.812	50.61	5910000	1	32269	200716_dc_IP79_NormalLung-W6Ab_DDA-OTOT-HCD_25cmPepMap2uTT_145m_01.raw	1	1	Q15583|TGIF1_HUMAN	Oxidation (M)	M3:Oxidation (M):1000.00		0
TNRPPLSLSR	36.74	1139.64	10	-1.6	380.887	40	4140000	1	24593	200716_dc_IP79_NormalLung-W6Ab_DDA-OTOT-HCD_25cmPepMap2uTT_145m_01.raw	1	1	Q07020|RL18_HUMAN				0
VPSEAAVRQL	36.74	1068.59	10	1	535.304	49.92	59000000	1	31597	200716_dc_IP79_NormalLung-W6Ab_DDA-OTOT-HCD_25cmPepMap2uTT_145m_01.raw	1	1	Q9NY15|STAB1_HUMAN				0
SYKDPTNIQSK	36.71	1279.64	11	-1.5	427.554	33.21	0	1	19807	200716_dc_IP79_NormalLung-W6Ab_DDA-OTOT-HCD_25cmPepMap2uTT_145m_01.raw	0	0	Q13813|SPTN1_HUMAN				0
LPKKTESHHKTK	36.71	1432.82	12	-0.4	478.612	11.77	287000	1	4566	200716_dc_IP79_NormalLung-W6Ab_DDA-OTOT-HCD_25cmPepMap2uTT_145m_01.raw	1	1	Q99878|H2A1J_HUMAN				0
VAKAVTQAL	36.7	899.544	9	-2.1	450.778	41.37	157000000	1	25523	200716_dc_IP79_NormalLung-W6Ab_DDA-OTOT-HCD_25cmPepMap2uTT_145m_01.raw	2	2	Q9Y490|TLN1_HUMAN				1
TPSEPHPVL	36.7	975.503	9	-1.3	488.758	47.32	28800000	1	29783	200716_dc_IP79_NormalLung-W6Ab_DDA-OTOT-HCD_25cmPepMap2uTT_145m_01.raw	1	1	Q9Y5A9|YTHD2_HUMAN				1
GASQAGMTAPGTK	36.7	1175.56	13	-1.3	588.787	32.81	2070000	1	19545	200716_dc_IP79_NormalLung-W6Ab_DDA-OTOT-HCD_25cmPepMap2uTT_145m_01.raw	1	1	P51911|CNN1_HUMAN				0
RPSSSRSYVTT	36.69	1239.62	11	-1.8	620.817	28.6	90300000	1	16478	200716_dc_IP79_NormalLung-W6Ab_DDA-OTOT-HCD_25cmPepMap2uTT_145m_01.raw	2	2	P08670|VIME_HUMAN				1
SFKGHVKEK	36.69	1058.59	9	-1.9	353.869	16.83	7370000	1	8063	200716_dc_IP79_NormalLung-W6Ab_DDA-OTOT-HCD_25cmPepMap2uTT_145m_01.raw	2	2	Q6ZRV2|FA83H_HUMAN				0
HESQQDYSK	36.68	1120.48	9	-1.5	561.246	19.65	1090000	1	10092	200716_dc_IP79_NormalLung-W6Ab_DDA-OTOT-HCD_25cmPepMap2uTT_145m_01.raw	1	1	Q14247|SRC8_HUMAN				0
LPHHRVIEV	36.68	1098.63	9	-1.4	550.321	36.17	50000000	1	21884	200716_dc_IP79_NormalLung-W6Ab_DDA-OTOT-HCD_25cmPepMap2uTT_145m_01.raw	2	2	P69849|NOMO3_HUMAN:Q15155|NOMO1_HUMAN:Q5JPE7|NOMO2_HUMAN				1
RFKDVRNPEA	36.68	1230.65	10	-1.3	411.222	30.86	30200000	1	18008	200716_dc_IP79_NormalLung-W6Ab_DDA-OTOT-HCD_25cmPepMap2uTT_145m_01.raw	1	1	Q9H467|CUED2_HUMAN				0
TFGGLGSK	36.67	765.402	8	-2	766.408	40.14	39800000	1	24698	200716_dc_IP79_NormalLung-W6Ab_DDA-OTOT-HCD_25cmPepMap2uTT_145m_01.raw	2	2	Q09666|AHNK_HUMAN				0
NNSRIKLGLKS	36.67	1228.73	11	-1.3	410.582	32.76	10700000	1	19468	200716_dc_IP79_NormalLung-W6Ab_DDA-OTOT-HCD_25cmPepMap2uTT_145m_01.raw	1	1	P16403|H12_HUMAN:P10412|H14_HUMAN:P16402|H13_HUMAN:P16401|H15_HUMAN				0
NNSRIKLGIKS	36.67	1228.73	11	-1.3	410.582	32.76	10700000	1	19468	200716_dc_IP79_NormalLung-W6Ab_DDA-OTOT-HCD_25cmPepMap2uTT_145m_01.raw	1	1	Q02539|H11_HUMAN				0
NDYFVVHMKQKGK	36.66	1592.81	13	-0.6	531.945	37.99	1100000	1	23235	200716_dc_IP79_NormalLung-W6Ab_DDA-OTOT-HCD_25cmPepMap2uTT_145m_01.raw	1	1	P60903|S10AA_HUMAN				0
APIDRVGQTI	36.66	1068.59	10	-1.9	535.303	52.54	7550000	1	33565	200716_dc_IP79_NormalLung-W6Ab_DDA-OTOT-HCD_25cmPepMap2uTT_145m_01.raw	1	1	P52272|HNRPM_HUMAN				1
TVRGAKAEEILEK	36.65	1442.81	13	-1.3	481.943	36.32	1070000	1	22022	200716_dc_IP79_NormalLung-W6Ab_DDA-OTOT-HCD_25cmPepMap2uTT_145m_01.raw	1	1	P62913|RL11_HUMAN				0
GLTPSQIGVILR	36.65	1252.75	12	-1.5	627.381	77.12	985000	1	50804	200716_dc_IP79_NormalLung-W6Ab_DDA-OTOT-HCD_25cmPepMap2uTT_145m_01.raw	1	1	P62277|RS13_HUMAN				0
SAPAPKKGSK	36.65	969.561	10	-0.7	485.787	10.64	10200000	1	3869	200716_dc_IP79_NormalLung-W6Ab_DDA-OTOT-HCD_25cmPepMap2uTT_145m_01.raw	1	1	P62807|H2B1C_HUMAN:O60814|H2B1K_HUMAN:P57053|H2BFS_HUMAN:Q93079|H2B1H_HUMAN:Q5QNW6|H2B2F_HUMAN:Q16778|H2B2E_HUMAN:P06899|H2B1J_HUMAN:Q99877|H2B1N_HUMAN:P58876|H2B1D_HUMAN:Q99880|H2B1L_HUMAN:P23527|H2B1O_HUMAN:Q8N257|H2B3B_HUMAN:P33778|H2B1B_HUMAN				0
FPNAIEHTL	36.64	1040.53	9	-1.2	521.271	63.29	9000000	1	41110	200716_dc_IP79_NormalLung-W6Ab_DDA-OTOT-HCD_25cmPepMap2uTT_145m_01.raw	1	1	P22314|UBA1_HUMAN				1
HGFSDNQK	36.64	931.415	8	-1.3	466.714	22.91	3050000	1	12532	200716_dc_IP79_NormalLung-W6Ab_DDA-OTOT-HCD_25cmPepMap2uTT_145m_01.raw	1	1	Q8WW12|PCNP_HUMAN				0
SRDGWGGYGSDK	36.63	1283.55	12	-1.1	428.858	38.33	1350000	1	23442	200716_dc_IP79_NormalLung-W6Ab_DDA-OTOT-HCD_25cmPepMap2uTT_145m_01.raw	1	1	Q15424|SAFB1_HUMAN:Q14151|SAFB2_HUMAN				0
VPNQKRLTL	36.62	1067.65	9	-1.2	534.829	38.13	24200000	1	23268	200716_dc_IP79_NormalLung-W6Ab_DDA-OTOT-HCD_25cmPepMap2uTT_145m_01.raw	2	2	O60488|ACSL4_HUMAN				1
FRTGNPTGTYQNG	36.62	1411.65	13	-2	706.83	41.41	1970000	1	25654	200716_dc_IP79_NormalLung-W6Ab_DDA-OTOT-HCD_25cmPepMap2uTT_145m_01.raw	1	1	P17844|DDX5_HUMAN				1
SGVSLAALKK	36.62	972.597	10	-1.5	487.305	41.91	137000000	1	25903	200716_dc_IP79_NormalLung-W6Ab_DDA-OTOT-HCD_25cmPepMap2uTT_145m_01.raw	1	1	P16403|H12_HUMAN:P10412|H14_HUMAN:P16402|H13_HUMAN				0
KALSDLGRYK	36.62	1149.65	10	0.4	384.224	36.12	18300000	1	21844	200716_dc_IP79_NormalLung-W6Ab_DDA-OTOT-HCD_25cmPepMap2uTT_145m_01.raw	2	2	Q8IWR0|Z3H7A_HUMAN				1
QPFFQKRSEL	36.61	1278.67	10	-1.6	427.231	48.35	46200000	1	30495	200716_dc_IP79_NormalLung-W6Ab_DDA-OTOT-HCD_25cmPepMap2uTT_145m_01.raw	2	2	Q01105|SET_HUMAN:P0DME0|SETLP_HUMAN				1
RIVAPPGGR	36.6	921.551	9	-1	461.782	30.18	3630000	1	17629	200716_dc_IP79_NormalLung-W6Ab_DDA-OTOT-HCD_25cmPepMap2uTT_145m_01.raw	1	1	Q16555|DPYL2_HUMAN:Q14195|DPYL3_HUMAN:Q14194|DPYL1_HUMAN				1
RPSVFHNIKL	36.59	1209.7	10	-2.5	404.239	48.49	4840000	1	30667	200716_dc_IP79_NormalLung-W6Ab_DDA-OTOT-HCD_25cmPepMap2uTT_145m_01.raw	1	1	O94956|SO2B1_HUMAN				0
QFTSSTSYNR	36.59	1189.54	10	-1.3	595.775	37.6	8910000	1	22908	200716_dc_IP79_NormalLung-W6Ab_DDA-OTOT-HCD_25cmPepMap2uTT_145m_01.raw	1	1	P02671|FIBA_HUMAN				0
HAVSEGTKA	36.58	898.451	9	-1.1	450.232	18.01	1280000	1	8891	200716_dc_IP79_NormalLung-W6Ab_DDA-OTOT-HCD_25cmPepMap2uTT_145m_01.raw	1	1	P62807|H2B1C_HUMAN:O60814|H2B1K_HUMAN:P57053|H2BFS_HUMAN:Q93079|H2B1H_HUMAN:Q5QNW6|H2B2F_HUMAN:Q16778|H2B2E_HUMAN:P06899|H2B1J_HUMAN:Q99877|H2B1N_HUMAN:P58876|H2B1D_HUMAN:Q99880|H2B1L_HUMAN:P23527|H2B1O_HUMAN:Q8N257|H2B3B_HUMAN:P33778|H2B1B_HUMAN:Q99879|H2B1M_HUMAN:Q96A08|H2B1A_HUMAN				1
KLKSFFKEY	36.58	1188.65	9	-0.9	595.334	45.99	40500000	1	28890	200716_dc_IP79_NormalLung-W6Ab_DDA-OTOT-HCD_25cmPepMap2uTT_145m_01.raw	2	2	P42696|RBM34_HUMAN				1
QPAPPREAHF	36.57	1148.57	10	-0.4	575.293	39.27	26900000	1	24091	200716_dc_IP79_NormalLung-W6Ab_DDA-OTOT-HCD_25cmPepMap2uTT_145m_01.raw	2	2	P46778|RL21_HUMAN				1
SPIKVIKVV	36.56	981.659	9	-1.2	491.836	49.43	2600000	1	31339	200716_dc_IP79_NormalLung-W6Ab_DDA-OTOT-HCD_25cmPepMap2uTT_145m_01.raw	1	1	Q9Y6K5|OAS3_HUMAN				1
KIRDTFC(+119.00)SY	36.55	1250.54	9	-1.6	626.278	42.65	20200000	1	26487	200716_dc_IP79_NormalLung-W6Ab_DDA-OTOT-HCD_25cmPepMap2uTT_145m_01.raw	2	2	Q9P265|DIP2B_HUMAN	Cysteinylation	C7:Cysteinylation:1000.00		0
TPDAM(+15.99)KAAM(+15.99)AL	36.55	1150.54	11	-1.7	576.274	46.68	11000000	1	29241	200716_dc_IP79_NormalLung-W6Ab_DDA-OTOT-HCD_25cmPepMap2uTT_145m_01.raw	1	1	P02792|FRIL_HUMAN	Oxidation (M)	M5:Oxidation (M):1000.00;M9:Oxidation (M):1000.00		0
GGYDVEKNNSR	36.55	1237.57	11	0	619.792	27.91	1110000	1	16053	200716_dc_IP79_NormalLung-W6Ab_DDA-OTOT-HCD_25cmPepMap2uTT_145m_01.raw	1	1	P16401|H15_HUMAN				0
KYKDIYTEL	36.55	1171.61	9	-0.9	586.813	52.93	42800000	1	33744	200716_dc_IP79_NormalLung-W6Ab_DDA-OTOT-HCD_25cmPepMap2uTT_145m_01.raw	1	1	Q6WCQ1|MPRIP_HUMAN				1
VPNGM(+15.99)KDSSVSL	36.55	1248.6	12	-1.6	625.307	43.83	5790000	1	27365	200716_dc_IP79_NormalLung-W6Ab_DDA-OTOT-HCD_25cmPepMap2uTT_145m_01.raw	1	1	Q92569|P55G_HUMAN	Oxidation (M)	M5:Oxidation (M):1000.00		0
HYKGQQIGKVVQ	36.55	1383.76	12	-1.2	462.261	30.62	10700000	1	17910	200716_dc_IP79_NormalLung-W6Ab_DDA-OTOT-HCD_25cmPepMap2uTT_145m_01.raw	1	1	P61254|RL26_HUMAN:Q9UNX3|RL26L_HUMAN				1
KPRNVVFVDM(+15.99)	36.55	1219.64	10	-1.6	610.825	42.75	6710000	1	26571	200716_dc_IP79_NormalLung-W6Ab_DDA-OTOT-HCD_25cmPepMap2uTT_145m_01.raw	2	2	P34932|HSP74_HUMAN	Oxidation (M)	M10:Oxidation (M):1000.00		0
SGEAKPKA	36.53	786.423	8	-0.1	394.219	13.01	18600000	1	5319	200716_dc_IP79_NormalLung-W6Ab_DDA-OTOT-HCD_25cmPepMap2uTT_145m_01.raw	2	2	P10412|H14_HUMAN:P16401|H15_HUMAN				0
SFPKDDPSKPVHL	36.53	1465.76	13	-1.5	489.592	45.11	31300000	1	28781	200716_dc_IP79_NormalLung-W6Ab_DDA-OTOT-HCD_25cmPepMap2uTT_145m_01.raw	1	1	P39023|RL3_HUMAN				0
VPQAKPVAV	36.52	907.549	9	-1	454.781	40.39	5120000	1	24867	200716_dc_IP79_NormalLung-W6Ab_DDA-OTOT-HCD_25cmPepMap2uTT_145m_01.raw	1	1	Q8WUD4|CCD12_HUMAN				1
SAVGFDYQGKTEK	36.52	1428.69	13	0.3	477.237	42.26	786000	1	26253	200716_dc_IP79_NormalLung-W6Ab_DDA-OTOT-HCD_25cmPepMap2uTT_145m_01.raw	1	1	Q14247|SRC8_HUMAN				0
IPQQSQSVKQL	36.52	1254.69	11	-1.2	628.353	42.7	5400000	1	26491	200716_dc_IP79_NormalLung-W6Ab_DDA-OTOT-HCD_25cmPepMap2uTT_145m_01.raw	1	1	Q9H2P0|ADNP_HUMAN				0
SPRLPVGGFRSL	36.51	1284.73	12	-0.1	643.372	61.97	15400000	1	40135	200716_dc_IP79_NormalLung-W6Ab_DDA-OTOT-HCD_25cmPepMap2uTT_145m_01.raw	2	2	Q14669|TRIPC_HUMAN				1
RSKTAVYKV	36.51	1050.62	9	0.1	351.214	26.45	34000000	1	14943	200716_dc_IP79_NormalLung-W6Ab_DDA-OTOT-HCD_25cmPepMap2uTT_145m_01.raw	2	2	Q6NZI2|CAVN1_HUMAN				0
HEENLKTKK	36.5	1125.61	9	0.7	376.212	12.67	2530000	1	5258	200716_dc_IP79_NormalLung-W6Ab_DDA-OTOT-HCD_25cmPepMap2uTT_145m_01.raw	1	1	P42766|RL35_HUMAN				0
AAHTHPVY	36.49	894.435	8	-1.3	448.224	26.74	4500000	1	15168	200716_dc_IP79_NormalLung-W6Ab_DDA-OTOT-HCD_25cmPepMap2uTT_145m_01.raw	1	1	Q13409|DC1I2_HUMAN:O14576|DC1I1_HUMAN				1
AEEEAQRANA	36.49	1087.49	10	-1.1	544.751	26.45	11800000	1	14945	200716_dc_IP79_NormalLung-W6Ab_DDA-OTOT-HCD_25cmPepMap2uTT_145m_01.raw	1	1	P35579|MYH9_HUMAN				1
AVKPKAAKPK	36.49	1036.68	10	0.1	519.345	14.12	45400000	1	6114	200716_dc_IP79_NormalLung-W6Ab_DDA-OTOT-HCD_25cmPepMap2uTT_145m_01.raw	1	1	P16403|H12_HUMAN:P10412|H14_HUMAN:P16401|H15_HUMAN				1
TDHLVKTHTRVS	36.48	1392.75	12	-0.8	465.256	26.45	22100000	1	14889	200716_dc_IP79_NormalLung-W6Ab_DDA-OTOT-HCD_25cmPepMap2uTT_145m_01.raw	1	1	P15880|RS2_HUMAN				1
HRRDQKWHDKQ	36.47	1532.77	11	0	384.2	15.81	5620000	1	7422	200716_dc_IP79_NormalLung-W6Ab_DDA-OTOT-HCD_25cmPepMap2uTT_145m_01.raw	1	1	P62266|RS23_HUMAN				0
M(+15.99)PKVKM(+15.99)PKF	36.47	1136.61	9	-1.3	569.311	31.84	127000000	1	18822	200716_dc_IP79_NormalLung-W6Ab_DDA-OTOT-HCD_25cmPepMap2uTT_145m_01.raw	1	1	Q09666|AHNK_HUMAN	Oxidation (M)	M1:Oxidation (M):1000.00;M6:Oxidation (M):1000.00		0
RPRPDEERPL	36.47	1263.67	10	-0.3	422.23	30.96	11700000	1	18172	200716_dc_IP79_NormalLung-W6Ab_DDA-OTOT-HCD_25cmPepMap2uTT_145m_01.raw	1	1	Q86YV0|RASL3_HUMAN				1
LPFGSSPHRVF	36.47	1242.65	11	-1.3	415.224	59.2	3320000	1	38237	200716_dc_IP79_NormalLung-W6Ab_DDA-OTOT-HCD_25cmPepMap2uTT_145m_01.raw	1	1	Q86WC4|OSTM1_HUMAN				0
N(+.98)LDSLPLVDTHSK	36.46	1438.73	13	2.2	720.374	67.2	1860000	1	43935	200716_dc_IP79_NormalLung-W6Ab_DDA-OTOT-HCD_25cmPepMap2uTT_145m_01.raw	1	1	P08670|VIME_HUMAN	Deamidation (NQ)	N1:Deamidation (NQ):1000.00		0
KVKPSSKFSLPK	36.46	1344.81	12	-1.6	449.277	31.5	701000	1	18647	200716_dc_IP79_NormalLung-W6Ab_DDA-OTOT-HCD_25cmPepMap2uTT_145m_01.raw	1	1	Q9BXM0|PRAX_HUMAN				0
YTYLRINFY	36.44	1251.63	9	-0.5	626.821	84.38	4860000	1	55859	200716_dc_IP79_NormalLung-W6Ab_DDA-OTOT-HCD_25cmPepMap2uTT_145m_01.raw	1	1	Q9Y5B9|SP16H_HUMAN				1
HHTIGGSR	36.44	863.436	8	-0.8	864.443	14.51	27900000	1	6413	200716_dc_IP79_NormalLung-W6Ab_DDA-OTOT-HCD_25cmPepMap2uTT_145m_01.raw	2	2	P61313|RL15_HUMAN				1
AAAPQRQAY	36.44	974.493	9	-0.9	488.253	30.03	7360000	1	17529	200716_dc_IP79_NormalLung-W6Ab_DDA-OTOT-HCD_25cmPepMap2uTT_145m_01.raw	1	1	Q8WZ82|OVCA2_HUMAN				1
KSFTPDHVVYA	36.44	1262.63	11	-0.2	632.322	48.21	16700000	1	30425	200716_dc_IP79_NormalLung-W6Ab_DDA-OTOT-HCD_25cmPepMap2uTT_145m_01.raw	2	2	Q6NZI2|CAVN1_HUMAN				0
AEAVRPHSA	36.43	936.478	9	-1.1	469.246	25.22	2330000	1	14070	200716_dc_IP79_NormalLung-W6Ab_DDA-OTOT-HCD_25cmPepMap2uTT_145m_01.raw	1	1	Q8NE01|CNNM3_HUMAN				1
TPKEAIEGTY	36.42	1107.54	10	-1.3	554.779	45.06	2200000	1	28229	200716_dc_IP79_NormalLung-W6Ab_DDA-OTOT-HCD_25cmPepMap2uTT_145m_01.raw	1	1	P62280|RS11_HUMAN				1
TVAGGAWTYNTTS	36.42	1327.6	13	-0.1	664.809	66.42	2500000	1	43392	200716_dc_IP79_NormalLung-W6Ab_DDA-OTOT-HCD_25cmPepMap2uTT_145m_01.raw	1	1	P61513|RL37A_HUMAN				0
ALKELYRTK	36.41	1120.66	9	-1.7	561.337	31.31	306000000	1	18405	200716_dc_IP79_NormalLung-W6Ab_DDA-OTOT-HCD_25cmPepMap2uTT_145m_01.raw	2	2	Q9NZN4|EHD2_HUMAN				1
SSVEIENPETSDQ	36.41	1433.62	13	-1	717.814	55.2	14600000	1	35357	200716_dc_IP79_NormalLung-W6Ab_DDA-OTOT-HCD_25cmPepMap2uTT_145m_01.raw	1	1	P02724|GLPA_HUMAN				1
VPVSTINHAF	36.4	1083.57	10	-0.4	542.793	56.04	10500000	1	36019	200716_dc_IP79_NormalLung-W6Ab_DDA-OTOT-HCD_25cmPepMap2uTT_145m_01.raw	1	1	O75410|TACC1_HUMAN				1
KSYTTPKKNK	36.4	1193.68	10	0	398.899	12.91	554000	1	5371	200716_dc_IP79_NormalLung-W6Ab_DDA-OTOT-HCD_25cmPepMap2uTT_145m_01.raw	1	1	P62979|RS27A_HUMAN				0
APKISIPDVDL	36.4	1166.65	11	-1.1	584.334	80.48	925000	1	53209	200716_dc_IP79_NormalLung-W6Ab_DDA-OTOT-HCD_25cmPepMap2uTT_145m_01.raw	1	1	Q09666|AHNK_HUMAN				0
TDHPKYSDM(+15.99)	36.4	1108.45	9	0.1	555.232	26.69	8020000	1	15160	200716_dc_IP79_NormalLung-W6Ab_DDA-OTOT-HCD_25cmPepMap2uTT_145m_01.raw	1	1	P07305|H10_HUMAN	Oxidation (M)	M9:Oxidation (M):1000.00		0
GSYVINGRTK	36.39	1093.59	10	-0.5	547.801	30.42	88000000	1	17758	200716_dc_IP79_NormalLung-W6Ab_DDA-OTOT-HCD_25cmPepMap2uTT_145m_01.raw	2	2	Q96KS0|EGLN2_HUMAN				1
AASLRKVSM(+15.99)	36.38	977.533	9	-1.2	489.773	27.08	10200000	1	15393	200716_dc_IP79_NormalLung-W6Ab_DDA-OTOT-HCD_25cmPepMap2uTT_145m_01.raw	1	1	Q7L1Q6|BZW1_HUMAN	Oxidation (M)	M9:Oxidation (M):1000.00		0
ALVQNDTLLQVK	36.37	1340.77	12	-0.8	671.39	65.48	3290000	1	42701	200716_dc_IP79_NormalLung-W6Ab_DDA-OTOT-HCD_25cmPepMap2uTT_145m_01.raw	1	1	Q92522|H1X_HUMAN				0
SYFVELGTQPATQ	36.36	1439.69	13	-1.6	720.853	81.51	2480000	1	53840	200716_dc_IP79_NormalLung-W6Ab_DDA-OTOT-HCD_25cmPepMap2uTT_145m_01.raw	1	1	P02652|APOA2_HUMAN				1
HIKHKYENK	36.35	1195.65	9	0.2	598.83	13.06	52100000	1	5434	200716_dc_IP79_NormalLung-W6Ab_DDA-OTOT-HCD_25cmPepMap2uTT_145m_01.raw	2	2	Q9UDW1|QCR9_HUMAN				1
RPYTNKVITL	36.35	1203.7	10	-1.7	402.239	48.11	6310000	1	30427	200716_dc_IP79_NormalLung-W6Ab_DDA-OTOT-HCD_25cmPepMap2uTT_145m_01.raw	2	2	Q14004|CDK13_HUMAN:Q9NYV4|CDK12_HUMAN				1
TRENLEKTRLK	36.35	1386.79	11	-1.5	463.271	26.73	9320000	1	15161	200716_dc_IP79_NormalLung-W6Ab_DDA-OTOT-HCD_25cmPepMap2uTT_145m_01.raw	1	1	Q6NZI2|CAVN1_HUMAN				0
GNFYVPAEPK	36.35	1120.56	10	-0.7	561.284	55.2	6710000	1	35401	200716_dc_IP79_NormalLung-W6Ab_DDA-OTOT-HCD_25cmPepMap2uTT_145m_01.raw	1	1	P18124|RL7_HUMAN				0
AEHRIDFVA	36.35	1056.54	9	-1.5	529.274	45.26	36200000	1	28319	200716_dc_IP79_NormalLung-W6Ab_DDA-OTOT-HCD_25cmPepMap2uTT_145m_01.raw	2	2	P49585|PCY1A_HUMAN				1
VPNPLPKVL	36.35	975.612	9	-0.5	488.813	68.84	4990000	1	44969	200716_dc_IP79_NormalLung-W6Ab_DDA-OTOT-HCD_25cmPepMap2uTT_145m_01.raw	1	1	O00291|HIP1_HUMAN				1
QPRNPKTDKL	36.33	1195.67	10	-0.5	399.563	25.91	9970000	1	14556	200716_dc_IP79_NormalLung-W6Ab_DDA-OTOT-HCD_25cmPepMap2uTT_145m_01.raw	1	1	P05023|AT1A1_HUMAN				1
AQKGQKAPAQK	36.33	1153.66	11	-0.6	577.835	11.28	824000	1	4196	200716_dc_IP79_NormalLung-W6Ab_DDA-OTOT-HCD_25cmPepMap2uTT_145m_01.raw	2	2	P50914|RL14_HUMAN				0
KPSPLLVGREF	36.32	1241.71	11	-0.7	621.863	56.39	62400000	1	36164	200716_dc_IP79_NormalLung-W6Ab_DDA-OTOT-HCD_25cmPepMap2uTT_145m_01.raw	2	2	Q9UN86|G3BP2_HUMAN:Q13283|G3BP1_HUMAN				1
SPQAGTKEKTL	36.32	1158.62	11	-0.3	580.319	27.01	0	1	15358	200716_dc_IP79_NormalLung-W6Ab_DDA-OTOT-HCD_25cmPepMap2uTT_145m_01.raw	0	0	Q96B67|ARRD3_HUMAN				0
TRAKGPSESSKER	36.3	1431.74	13	-1.2	478.254	14.6	1100000	1	6458	200716_dc_IP79_NormalLung-W6Ab_DDA-OTOT-HCD_25cmPepMap2uTT_145m_01.raw	1	1	Q8TEA8|DTD1_HUMAN				0
TSAKPSSTTP	36.3	975.487	10	-1	488.75	26.78	40500000	1	15197	200716_dc_IP79_NormalLung-W6Ab_DDA-OTOT-HCD_25cmPepMap2uTT_145m_01.raw	1	1	P27816|MAP4_HUMAN				0
EELIFRYLP	36.3	1178.63	9	-1.4	590.323	94.12	3290000	1	62771	200716_dc_IP79_NormalLung-W6Ab_DDA-OTOT-HCD_25cmPepMap2uTT_145m_01.raw	1	1	Q1L5Z9|LONF2_HUMAN				0
AENAYHIHQA	36.3	1152.53	10	0	577.273	30.49	0	1	17858	200716_dc_IP79_NormalLung-W6Ab_DDA-OTOT-HCD_25cmPepMap2uTT_145m_01.raw	0	0	Q9ULG1|INO80_HUMAN				1
IPKSAVGEL	36.29	912.528	9	-1.5	457.271	49.14	63200000	1	31052	200716_dc_IP79_NormalLung-W6Ab_DDA-OTOT-HCD_25cmPepMap2uTT_145m_01.raw	1	1	P05107|ITB2_HUMAN:P26010|ITB7_HUMAN				1
SQVAEAVLTSQLK	36.29	1372.76	13	-1.2	687.385	64.72	2210000	1	42203	200716_dc_IP79_NormalLung-W6Ab_DDA-OTOT-HCD_25cmPepMap2uTT_145m_01.raw	1	1	P49590|SYHM_HUMAN				0
NPAENFRVL	36.27	1058.55	9	-0.6	1059.56	62.41	40800000	1	40415	200716_dc_IP79_NormalLung-W6Ab_DDA-OTOT-HCD_25cmPepMap2uTT_145m_01.raw	2	2	P13010|XRCC5_HUMAN				1
SETGAGKHVPRA	36.27	1208.63	12	-0.8	403.882	25.81	51200000	1	14425	200716_dc_IP79_NormalLung-W6Ab_DDA-OTOT-HCD_25cmPepMap2uTT_145m_01.raw	1	1	P68363|TBA1B_HUMAN:Q71U36|TBA1A_HUMAN:Q9BQE3|TBA1C_HUMAN:P0DPH8|TBA3D_HUMAN:P0DPH7|TBA3C_HUMAN:Q6PEY2|TBA3E_HUMAN				1
KFIEIAARKK	36.27	1202.75	10	-0.8	401.924	29.83	75300000	1	17323	200716_dc_IP79_NormalLung-W6Ab_DDA-OTOT-HCD_25cmPepMap2uTT_145m_01.raw	2	2	Q00839|HNRPU_HUMAN				1
TLVQTKGTGASG	36.27	1118.59	12	-1.2	560.303	31.7	4760000	1	18743	200716_dc_IP79_NormalLung-W6Ab_DDA-OTOT-HCD_25cmPepMap2uTT_145m_01.raw	1	1	P16403|H12_HUMAN:P10412|H14_HUMAN:P16402|H13_HUMAN:P16401|H15_HUMAN:Q02539|H11_HUMAN				1
TESLQANVQRLK	36.27	1385.76	12	-0.4	462.928	44.91	909000	1	28183	200716_dc_IP79_NormalLung-W6Ab_DDA-OTOT-HCD_25cmPepMap2uTT_145m_01.raw	1	1	P26373|RL13_HUMAN				0
AEHVVQPKA	36.26	977.529	9	-0.9	489.772	27.38	2980000	1	15682	200716_dc_IP79_NormalLung-W6Ab_DDA-OTOT-HCD_25cmPepMap2uTT_145m_01.raw	1	1	O75626|PRDM1_HUMAN				1
AEVHLKFSA	36.26	1000.53	9	-1.6	501.274	47.27	2430000	1	29826	200716_dc_IP79_NormalLung-W6Ab_DDA-OTOT-HCD_25cmPepMap2uTT_145m_01.raw	1	1	O60861|GAS7_HUMAN				0
SSVATITRL	36.25	946.545	9	-0.8	474.279	53.08	24800000	1	33880	200716_dc_IP79_NormalLung-W6Ab_DDA-OTOT-HCD_25cmPepMap2uTT_145m_01.raw	2	2	Q9Y490|TLN1_HUMAN				1
TGASGSFKL	36.25	866.45	9	0.5	434.232	48.4	479000000	1	30478	200716_dc_IP79_NormalLung-W6Ab_DDA-OTOT-HCD_25cmPepMap2uTT_145m_01.raw	2	2	P16403|H12_HUMAN:P10412|H14_HUMAN:P16402|H13_HUMAN:P16401|H15_HUMAN:Q02539|H11_HUMAN:P22492|H1T_HUMAN				0
SEIKVPDVELK	36.24	1255.7	11	-1.3	419.574	59.35	3040000	1	38343	200716_dc_IP79_NormalLung-W6Ab_DDA-OTOT-HCD_25cmPepMap2uTT_145m_01.raw	1	1	Q09666|AHNK_HUMAN				0
RPKPAGPPP	36.24	915.529	9	-0.5	458.772	26.05	104000000	1	14534	200716_dc_IP79_NormalLung-W6Ab_DDA-OTOT-HCD_25cmPepMap2uTT_145m_01.raw	1	1	Q8WXE0|CSKI2_HUMAN				1
TPRPFGSQTR	36.24	1145.59	10	-1.8	382.871	31.45	4180000	1	18542	200716_dc_IP79_NormalLung-W6Ab_DDA-OTOT-HCD_25cmPepMap2uTT_145m_01.raw	1	1	Q8WWI1|LMO7_HUMAN				0
RFQAFVKKK	36.24	1150.7	9	-1.7	384.572	26.73	17500000	1	15128	200716_dc_IP79_NormalLung-W6Ab_DDA-OTOT-HCD_25cmPepMap2uTT_145m_01.raw	1	1	Q12802|AKP13_HUMAN				1
RPGGAGNIKTL	36.23	1082.62	11	-0.3	361.88	33.46	1310000	1	20016	200716_dc_IP79_NormalLung-W6Ab_DDA-OTOT-HCD_25cmPepMap2uTT_145m_01.raw	1	1	Q9UBY9|HSPB7_HUMAN				0
EEFQFIKKA	36.23	1138.6	9	0.5	570.309	51.26	13300000	1	32650	200716_dc_IP79_NormalLung-W6Ab_DDA-OTOT-HCD_25cmPepMap2uTT_145m_01.raw	1	1	P55081|MFAP1_HUMAN				1
KVAVATPAK	36.22	883.549	9	-1.2	442.781	26.88	48100000	1	15183	200716_dc_IP79_NormalLung-W6Ab_DDA-OTOT-HCD_25cmPepMap2uTT_145m_01.raw	1	1	P19338|NUCL_HUMAN				1
FPNIASATKFKQL	36.22	1463.81	13	-1.8	488.944	67.9	4080000	1	44515	200716_dc_IP79_NormalLung-W6Ab_DDA-OTOT-HCD_25cmPepMap2uTT_145m_01.raw	1	1	P09601|HMOX1_HUMAN				0
RVLFVEKKK	36.22	1145.73	9	-2.7	382.916	26.64	5810000	1	15126	200716_dc_IP79_NormalLung-W6Ab_DDA-OTOT-HCD_25cmPepMap2uTT_145m_01.raw	1	1	O75394|RM33_HUMAN				1
AAAGGGGGGGRYY	36.21	1112.5	13	-1.1	557.257	34.94	1570000	1	21086	200716_dc_IP79_NormalLung-W6Ab_DDA-OTOT-HCD_25cmPepMap2uTT_145m_01.raw	1	1	P14866|HNRPL_HUMAN				1
IPNNVKTAV	36.21	954.55	9	-0.8	478.282	41.37	10700000	1	25583	200716_dc_IP79_NormalLung-W6Ab_DDA-OTOT-HCD_25cmPepMap2uTT_145m_01.raw	1	1	P07437|TBB5_HUMAN:P68371|TBB4B_HUMAN:P04350|TBB4A_HUMAN:Q9BVA1|TBB2B_HUMAN:Q13885|TBB2A_HUMAN				1
LPNNVKTAV	36.21	954.55	9	-0.8	478.282	41.37	10700000	1	25583	200716_dc_IP79_NormalLung-W6Ab_DDA-OTOT-HCD_25cmPepMap2uTT_145m_01.raw	1	1	Q3ZCM7|TBB8_HUMAN				1
SAADGPRVF	36.21	918.456	9	-1	460.235	48.3	12700000	1	30515	200716_dc_IP79_NormalLung-W6Ab_DDA-OTOT-HCD_25cmPepMap2uTT_145m_01.raw	1	1	Q9Y285|SYFA_HUMAN				1
LPRKNLPERLL	36.2	1347.84	11	-0.2	450.286	47.02	5080000	1	29584	200716_dc_IP79_NormalLung-W6Ab_DDA-OTOT-HCD_25cmPepMap2uTT_145m_01.raw	1	1	O75153|CLU_HUMAN				0
SFIVRLDSQK	36.2	1191.66	10	0.3	596.838	51.8	5750000	1	33009	200716_dc_IP79_NormalLung-W6Ab_DDA-OTOT-HCD_25cmPepMap2uTT_145m_01.raw	1	1	P46781|RS9_HUMAN				0
KPFEQVKGITL	36.2	1258.73	11	-1.5	630.371	58.9	14800000	1	37976	200716_dc_IP79_NormalLung-W6Ab_DDA-OTOT-HCD_25cmPepMap2uTT_145m_01.raw	2	2	P33121|ACSL1_HUMAN				1
RPQLHKNTVL	36.19	1204.7	10	-0.9	402.575	31.16	15600000	1	18307	200716_dc_IP79_NormalLung-W6Ab_DDA-OTOT-HCD_25cmPepMap2uTT_145m_01.raw	2	2	Q14258|TRI25_HUMAN				1
LPKKTESHHK	36.18	1203.67	10	0.1	402.231	11.53	1450000	1	4389	200716_dc_IP79_NormalLung-W6Ab_DDA-OTOT-HCD_25cmPepMap2uTT_145m_01.raw	2	2	P20671|H2A1D_HUMAN:P04908|H2A1B_HUMAN:Q93077|H2A1C_HUMAN:Q7L7L0|H2A3_HUMAN:P0C0S8|H2A1_HUMAN:Q6FI13|H2A2A_HUMAN:Q96KK5|H2A1H_HUMAN:Q99878|H2A1J_HUMAN				0
GPREAFRQL	36.18	1072.58	9	-0.3	358.533	43.29	102000000	1	26767	200716_dc_IP79_NormalLung-W6Ab_DDA-OTOT-HCD_25cmPepMap2uTT_145m_01.raw	2	2	P57086|SCND1_HUMAN				1
VPNSAIYKRVL	36.18	1258.74	11	-0.5	420.587	51.55	7110000	1	32838	200716_dc_IP79_NormalLung-W6Ab_DDA-OTOT-HCD_25cmPepMap2uTT_145m_01.raw	2	2	Q86U86|PB1_HUMAN				0
APSAC(+119.00)RTLVL	36.18	1148.57	10	-1.3	575.291	50.71	2720000	1	32279	200716_dc_IP79_NormalLung-W6Ab_DDA-OTOT-HCD_25cmPepMap2uTT_145m_01.raw	1	1	Q9HC84|MUC5B_HUMAN	Cysteinylation	C5:Cysteinylation:1000.00		0
AEAYLGKTVT	36.18	1051.55	10	-1.5	526.784	45.04	0	1	28225	200716_dc_IP79_NormalLung-W6Ab_DDA-OTOT-HCD_25cmPepMap2uTT_145m_01.raw	0	0	P11142|HSP7C_HUMAN				1
KLEDGPKFLK	36.17	1173.68	10	-1	392.232	41.07	8180000	1	25369	200716_dc_IP79_NormalLung-W6Ab_DDA-OTOT-HCD_25cmPepMap2uTT_145m_01.raw	1	1	P68104|EF1A1_HUMAN:Q5VTE0|EF1A3_HUMAN				1
GLKKFYITK	36.17	1096.66	9	-0.8	366.562	37.3	10800000	1	22653	200716_dc_IP79_NormalLung-W6Ab_DDA-OTOT-HCD_25cmPepMap2uTT_145m_01.raw	2	2	O00116|ADAS_HUMAN				1
MPKFSM(+15.99)PGF	36.16	1056.48	9	-0.8	529.245	65.58	179000000	1	42693	200716_dc_IP79_NormalLung-W6Ab_DDA-OTOT-HCD_25cmPepMap2uTT_145m_01.raw	2	2	Q09666|AHNK_HUMAN	Oxidation (M)	M6:Oxidation (M):48.54		0
SAAELRHVM(+15.99)	36.16	1028.51	9	-0.6	515.261	29.54	63300000	1	17049	200716_dc_IP79_NormalLung-W6Ab_DDA-OTOT-HCD_25cmPepMap2uTT_145m_01.raw	1	1	P0DP24|CALM2_HUMAN:P0DP23|CALM1_HUMAN:P0DP25|CALM3_HUMAN:P27482|CALL3_HUMAN	Oxidation (M)	M9:Oxidation (M):1000.00		0
SVYYNEATGGK	36.15	1187.55	11	-1	594.78	40.39	2210000	1	24919	200716_dc_IP79_NormalLung-W6Ab_DDA-OTOT-HCD_25cmPepMap2uTT_145m_01.raw	1	1	P07437|TBB5_HUMAN				1
KPAAATVTK	36.15	885.528	9	-1	443.771	20.85	6820000	1	11060	200716_dc_IP79_NormalLung-W6Ab_DDA-OTOT-HCD_25cmPepMap2uTT_145m_01.raw	1	1	P16403|H12_HUMAN				0
HTSQKDYSRG	36.14	1177.55	10	-0.5	393.523	15.52	1110000	1	7201	200716_dc_IP79_NormalLung-W6Ab_DDA-OTOT-HCD_25cmPepMap2uTT_145m_01.raw	2	2	P14317|HCLS1_HUMAN				0
KEEVGEEAIVEL	36.14	1343.68	12	0.9	672.849	70.32	7090000	1	46079	200716_dc_IP79_NormalLung-W6Ab_DDA-OTOT-HCD_25cmPepMap2uTT_145m_01.raw	1	1	P35579|MYH9_HUMAN				0
SALRPSTS	36.13	817.429	8	-2.1	409.721	28.8	3450000	1	16651	200716_dc_IP79_NormalLung-W6Ab_DDA-OTOT-HCD_25cmPepMap2uTT_145m_01.raw	1	1	P08670|VIME_HUMAN				1
SPYTKIFQF	36.13	1129.58	9	-1.2	565.797	81.17	5770000	1	53557	200716_dc_IP79_NormalLung-W6Ab_DDA-OTOT-HCD_25cmPepMap2uTT_145m_01.raw	1	1	Q9Y6Y0|NS1BP_HUMAN				0
AESPASRQAA	36.12	986.478	10	-1.1	494.246	26.4	21900000	1	14876	200716_dc_IP79_NormalLung-W6Ab_DDA-OTOT-HCD_25cmPepMap2uTT_145m_01.raw	1	1	Q86YP4|P66A_HUMAN				1
HDVTAQDPKL	36.12	1122.57	10	-0.9	562.29	37.44	0	1	22810	200716_dc_IP79_NormalLung-W6Ab_DDA-OTOT-HCD_25cmPepMap2uTT_145m_01.raw	0	0	Q13435|SF3B2_HUMAN				0
TGGVKKPHRYRP	36.12	1394.79	12	-1.5	465.936	25.12	24400000	1	13942	200716_dc_IP79_NormalLung-W6Ab_DDA-OTOT-HCD_25cmPepMap2uTT_145m_01.raw	1	1	Q71DI3|H32_HUMAN:P68431|H31_HUMAN:Q16695|H31T_HUMAN:P84243|H33_HUMAN				0
AMAVRIQAY	36.11	1021.54	9	-1.6	511.775	56.24	3260000	1	36180	200716_dc_IP79_NormalLung-W6Ab_DDA-OTOT-HCD_25cmPepMap2uTT_145m_01.raw	1	1	P62745|RHOB_HUMAN				1
AAAKAPTKAAPK	36.11	1123.67	12	-1.6	375.564	24.16	0	1	13265	200716_dc_IP79_NormalLung-W6Ab_DDA-OTOT-HCD_25cmPepMap2uTT_145m_01.raw	0	0	P83731|RL24_HUMAN				0
KYKEETIEKM	36.1	1297.66	10	-0.3	433.56	32.76	4940000	1	19464	200716_dc_IP79_NormalLung-W6Ab_DDA-OTOT-HCD_25cmPepMap2uTT_145m_01.raw	1	1	P61254|RL26_HUMAN				0
HRGDADQASNILA	36.1	1366.66	13	-1.2	684.336	41.12	4990000	1	25434	200716_dc_IP79_NormalLung-W6Ab_DDA-OTOT-HCD_25cmPepMap2uTT_145m_01.raw	2	2	P43243|MATR3_HUMAN				0
GPPVSELITK	36.08	1039.59	10	-0.7	520.803	54.61	59900000	1	34863	200716_dc_IP79_NormalLung-W6Ab_DDA-OTOT-HCD_25cmPepMap2uTT_145m_01.raw	1	1	P16403|H12_HUMAN:P10412|H14_HUMAN:P16402|H13_HUMAN:P16401|H15_HUMAN				1
TGASGSFKLN(+.98)	36.08	981.477	10	-0.8	491.745	48.25	9280000	1	30461	200716_dc_IP79_NormalLung-W6Ab_DDA-OTOT-HCD_25cmPepMap2uTT_145m_01.raw	1	1	P16403|H12_HUMAN:P10412|H14_HUMAN:P16402|H13_HUMAN:P16401|H15_HUMAN:Q02539|H11_HUMAN	Deamidation (NQ)	N10:Deamidation (NQ):1000.00		0
SVYVYKVLK	36.07	1097.65	9	-0.4	549.831	48.74	3630000	1	30882	200716_dc_IP79_NormalLung-W6Ab_DDA-OTOT-HCD_25cmPepMap2uTT_145m_01.raw	2	2	P62807|H2B1C_HUMAN:O60814|H2B1K_HUMAN:P57053|H2BFS_HUMAN:Q93079|H2B1H_HUMAN:Q5QNW6|H2B2F_HUMAN:Q99877|H2B1N_HUMAN:P58876|H2B1D_HUMAN:Q99880|H2B1L_HUMAN:Q99879|H2B1M_HUMAN				1
SEAKPAAVA	36.07	842.45	9	-1.1	422.232	28.26	102000000	1	16223	200716_dc_IP79_NormalLung-W6Ab_DDA-OTOT-HCD_25cmPepMap2uTT_145m_01.raw	2	2	Q9Y490|TLN1_HUMAN				1
TVGVEPAADGK	36.07	1042.53	11	-0.7	522.272	34.5	7480000	1	20697	200716_dc_IP79_NormalLung-W6Ab_DDA-OTOT-HCD_25cmPepMap2uTT_145m_01.raw	1	1	P46779|RL28_HUMAN				1
HVQHM(+15.99)GTSHG	36.06	1105.47	10	-0.9	553.743	11.33	1420000	1	4253	200716_dc_IP79_NormalLung-W6Ab_DDA-OTOT-HCD_25cmPepMap2uTT_145m_01.raw	2	2	Q16204|CCDC6_HUMAN	Oxidation (M)	M5:Oxidation (M):1000.00		0
RTKTLVKNC(+119.00)	36.05	1180.61	9	-0.4	394.542	17.57	10200000	1	8546	200716_dc_IP79_NormalLung-W6Ab_DDA-OTOT-HCD_25cmPepMap2uTT_145m_01.raw	2	2	P62241|RS8_HUMAN	Cysteinylation	C9:Cysteinylation:1000.00		0
AEHPKTHVT	36.05	1018.52	9	-0.6	510.267	17.57	41500000	1	8851	200716_dc_IP79_NormalLung-W6Ab_DDA-OTOT-HCD_25cmPepMap2uTT_145m_01.raw	2	2	Q29960|1C16_HUMAN:P04222|1C03_HUMAN:P30499|1C01_HUMAN:P30504|1C04_HUMAN:P30505|1C08_HUMAN:Q29963|1C06_HUMAN:Q29865|1C18_HUMAN:P30510|1C14_HUMAN:Q9TNN7|1C05_HUMAN:P30508|1C12_HUMAN:Q07000|1C15_HUMAN:P30501|1C02_HUMAN				1
ATVTPSPVKGKGK	36.05	1268.75	13	-1.4	423.922	25.86	6350000	1	14536	200716_dc_IP79_NormalLung-W6Ab_DDA-OTOT-HCD_25cmPepMap2uTT_145m_01.raw	1	1	Q9H1E3|NUCKS_HUMAN				0
TISPLDLAKLNQ	36.05	1311.74	12	-1.1	656.876	80.13	5180000	1	52861	200716_dc_IP79_NormalLung-W6Ab_DDA-OTOT-HCD_25cmPepMap2uTT_145m_01.raw	1	1	Q15365|PCBP1_HUMAN				1
SASVNKEPVSLPG	36.05	1283.67	13	-0.9	642.843	50.81	8970000	1	32250	200716_dc_IP79_NormalLung-W6Ab_DDA-OTOT-HCD_25cmPepMap2uTT_145m_01.raw	1	1	Q8WWI1|LMO7_HUMAN				0
KLPKFNFSGSK	36.05	1251.7	11	-1.4	418.239	44.96	4960000	1	28154	200716_dc_IP79_NormalLung-W6Ab_DDA-OTOT-HCD_25cmPepMap2uTT_145m_01.raw	1	1	Q09666|AHNK_HUMAN				1
AESYHQHFA	36.04	1088.47	9	-0.5	545.241	31.7	1460000	1	18748	200716_dc_IP79_NormalLung-W6Ab_DDA-OTOT-HCD_25cmPepMap2uTT_145m_01.raw	1	1	Q03169|TNAP2_HUMAN				1
VPKEISPDTTL	36.03	1198.64	11	-0.9	600.329	56.04	3700000	1	35966	200716_dc_IP79_NormalLung-W6Ab_DDA-OTOT-HCD_25cmPepMap2uTT_145m_01.raw	1	1	P21810|PGS1_HUMAN				0
HKKGQSEEIQK	36.03	1310.69	11	0.1	437.905	13.78	3900000	1	5936	200716_dc_IP79_NormalLung-W6Ab_DDA-OTOT-HCD_25cmPepMap2uTT_145m_01.raw	2	2	P83731|RL24_HUMAN				1
TVETRDGQVI	36.03	1116.58	10	-1.4	559.295	42.11	27800000	1	26042	200716_dc_IP79_NormalLung-W6Ab_DDA-OTOT-HCD_25cmPepMap2uTT_145m_01.raw	1	1	P08670|VIME_HUMAN				1
KFIDTTSKF	36.03	1085.58	9	0.5	543.795	48.65	3060000	1	30806	200716_dc_IP79_NormalLung-W6Ab_DDA-OTOT-HCD_25cmPepMap2uTT_145m_01.raw	1	1	P39023|RL3_HUMAN:Q92901|RL3L_HUMAN				1
VPRSPFKVKVL	36.03	1268.8	11	-0.3	423.939	51.8	5740000	1	33023	200716_dc_IP79_NormalLung-W6Ab_DDA-OTOT-HCD_25cmPepMap2uTT_145m_01.raw	1	1	P21333|FLNA_HUMAN				1
SPEAQPKTL	36.03	969.513	9	-0.3	485.764	34.44	14600000	1	20613	200716_dc_IP79_NormalLung-W6Ab_DDA-OTOT-HCD_25cmPepMap2uTT_145m_01.raw	1	1	P55265|DSRAD_HUMAN				1
SPQPPKKDSL	36.02	1095.59	10	-0.7	548.803	30.97	19800000	1	18185	200716_dc_IP79_NormalLung-W6Ab_DDA-OTOT-HCD_25cmPepMap2uTT_145m_01.raw	1	1	Q92503|S14L1_HUMAN				1
RPGRIDRKIEF	36	1385.79	11	-0.4	462.937	39.56	5810000	1	24287	200716_dc_IP79_NormalLung-W6Ab_DDA-OTOT-HCD_25cmPepMap2uTT_145m_01.raw	1	1	P62191|PRS4_HUMAN:P62195|PRS8_HUMAN				1
RPGRLDRKIEF	36	1385.79	11	-0.4	462.937	39.56	5810000	1	24287	200716_dc_IP79_NormalLung-W6Ab_DDA-OTOT-HCD_25cmPepMap2uTT_145m_01.raw	1	1	P35998|PRS7_HUMAN:P43686|PRS6B_HUMAN				1
TPDAMKAAM	36	934.425	9	-1	468.219	44.54	1020000	1	27881	200716_dc_IP79_NormalLung-W6Ab_DDA-OTOT-HCD_25cmPepMap2uTT_145m_01.raw	1	1	P02792|FRIL_HUMAN				1
AVLKYYKVDENGK	36	1525.81	13	-1.2	509.611	40.19	1100000	1	24777	200716_dc_IP79_NormalLung-W6Ab_DDA-OTOT-HCD_25cmPepMap2uTT_145m_01.raw	1	1	P62979|RS27A_HUMAN				0
AEQEKFLTC(+119.00)	35.99	1186.5	9	-1.6	594.256	44.67	3820000	1	27939	200716_dc_IP79_NormalLung-W6Ab_DDA-OTOT-HCD_25cmPepMap2uTT_145m_01.raw	1	1	Q14573|ITPR3_HUMAN:Q14571|ITPR2_HUMAN:Q14643|ITPR1_HUMAN	Cysteinylation	C9:Cysteinylation:1000.00		0
RNLDIERPTY	35.99	1275.66	10	-0.3	426.226	48.79	248000000	1	30763	200716_dc_IP79_NormalLung-W6Ab_DDA-OTOT-HCD_25cmPepMap2uTT_145m_01.raw	2	2	P68363|TBA1B_HUMAN:Q71U36|TBA1A_HUMAN:Q9BQE3|TBA1C_HUMAN:P0DPH8|TBA3D_HUMAN:P0DPH7|TBA3C_HUMAN:Q6PEY2|TBA3E_HUMAN:P68366|TBA4A_HUMAN:Q9NY65|TBA8_HUMAN				1
RPAVALIRKL	35.99	1135.76	10	-2.7	379.591	44.56	1810000	1	27906	200716_dc_IP79_NormalLung-W6Ab_DDA-OTOT-HCD_25cmPepMap2uTT_145m_01.raw	1	1	Q9ULT8|HECD1_HUMAN				0
RTKYIDDTVK	35.98	1237.67	10	0.1	413.563	30.49	932000	1	17854	200716_dc_IP79_NormalLung-W6Ab_DDA-OTOT-HCD_25cmPepMap2uTT_145m_01.raw	1	1	Q92576|PHF3_HUMAN				1
APDENIPAKIL	35.97	1179.65	11	-1	590.832	65.58	2350000	1	42771	200716_dc_IP79_NormalLung-W6Ab_DDA-OTOT-HCD_25cmPepMap2uTT_145m_01.raw	1	1	P11387|TOP1_HUMAN				0
HFGKAPGTP	35.96	910.466	9	-0.7	456.24	30.86	58000000	1	18269	200716_dc_IP79_NormalLung-W6Ab_DDA-OTOT-HCD_25cmPepMap2uTT_145m_01.raw	1	1	Q07020|RL18_HUMAN				1
AESPASRQA	35.95	915.441	9	-1.5	916.447	25.86	36800000	1	14507	200716_dc_IP79_NormalLung-W6Ab_DDA-OTOT-HCD_25cmPepMap2uTT_145m_01.raw	1	1	Q86YP4|P66A_HUMAN				1
YPFIQGEHVL	35.94	1201.61	10	-0.5	601.813	74.1	3430000	1	48631	200716_dc_IP79_NormalLung-W6Ab_DDA-OTOT-HCD_25cmPepMap2uTT_145m_01.raw	1	1	Q9P266|JCAD_HUMAN				0
KLTFISGRTK	35.93	1149.69	10	0.3	384.236	33.61	13900000	1	20038	200716_dc_IP79_NormalLung-W6Ab_DDA-OTOT-HCD_25cmPepMap2uTT_145m_01.raw	1	1	Q15005|SPCS2_HUMAN				1
QPREPQVYTL	35.92	1229.64	10	-0.2	615.827	56.19	25700000	1	36075	200716_dc_IP79_NormalLung-W6Ab_DDA-OTOT-HCD_25cmPepMap2uTT_145m_01.raw	1	1	P0DOX5|IGG1_HUMAN:P01859|IGHG2_HUMAN:P01861|IGHG4_HUMAN:P01857|IGHG1_HUMAN:P01860|IGHG3_HUMAN				1
GIRLTIAEERDK	35.92	1399.78	12	-1.9	467.599	41.84	402000	1	25873	200716_dc_IP79_NormalLung-W6Ab_DDA-OTOT-HCD_25cmPepMap2uTT_145m_01.raw	1	1	P62701|RS4X_HUMAN:Q8TD47|RS4Y2_HUMAN				0
SFGGLGGGSVR	35.92	992.504	11	-1.3	497.259	48.79	42800000	1	30837	200716_dc_IP79_NormalLung-W6Ab_DDA-OTOT-HCD_25cmPepMap2uTT_145m_01.raw	1	1	P08727|K1C19_HUMAN				0
RVVLVEKRTK	35.92	1226.78	10	-0.5	409.935	25.78	309000	1	14465	200716_dc_IP79_NormalLung-W6Ab_DDA-OTOT-HCD_25cmPepMap2uTT_145m_01.raw	1	1	Q8TDZ2|MICA1_HUMAN				0
SGPFGQIFRP	35.92	1104.57	10	0.1	553.293	74.94	2920000	1	49145	200716_dc_IP79_NormalLung-W6Ab_DDA-OTOT-HCD_25cmPepMap2uTT_145m_01.raw	1	1	P07437|TBB5_HUMAN:P68371|TBB4B_HUMAN:P04350|TBB4A_HUMAN:Q9BVA1|TBB2B_HUMAN:Q13885|TBB2A_HUMAN				1
SGPFGQLFRP	35.92	1104.57	10	0.1	553.293	74.94	2920000	1	49145	200716_dc_IP79_NormalLung-W6Ab_DDA-OTOT-HCD_25cmPepMap2uTT_145m_01.raw	1	1	Q9BUF5|TBB6_HUMAN				1
SSAPTARVF	35.91	934.487	9	-1.1	935.494	46.04	39400000	1	28913	200716_dc_IP79_NormalLung-W6Ab_DDA-OTOT-HCD_25cmPepMap2uTT_145m_01.raw	2	2	O94906|PRP6_HUMAN				1
TPTSAGPNSFNK	35.9	1219.58	12	-1.5	610.798	37.2	2180000	1	22626	200716_dc_IP79_NormalLung-W6Ab_DDA-OTOT-HCD_25cmPepMap2uTT_145m_01.raw	1	1	Q8WW12|PCNP_HUMAN				0
TAPAAGVVPSRVK	35.9	1251.73	13	-2.1	418.25	37.6	3660000	1	22861	200716_dc_IP79_NormalLung-W6Ab_DDA-OTOT-HCD_25cmPepMap2uTT_145m_01.raw	1	1	P27816|MAP4_HUMAN				0
SAPAPKKGSKKAV	35.88	1267.76	13	-0.9	423.594	14.79	4210000	1	6636	200716_dc_IP79_NormalLung-W6Ab_DDA-OTOT-HCD_25cmPepMap2uTT_145m_01.raw	2	2	P62807|H2B1C_HUMAN:O60814|H2B1K_HUMAN:P57053|H2BFS_HUMAN:Q93079|H2B1H_HUMAN:Q5QNW6|H2B2F_HUMAN:Q16778|H2B2E_HUMAN:P06899|H2B1J_HUMAN:Q99877|H2B1N_HUMAN:P58876|H2B1D_HUMAN:Q99880|H2B1L_HUMAN:P23527|H2B1O_HUMAN:Q8N257|H2B3B_HUMAN				0
SPGGVYATR	35.88	906.456	9	0.9	454.236	33	1310000	1	19656	200716_dc_IP79_NormalLung-W6Ab_DDA-OTOT-HCD_25cmPepMap2uTT_145m_01.raw	1	1	P08670|VIME_HUMAN				1
RAKPDFKEL	35.87	1102.61	9	-2.5	368.544	35.43	4570000	1	21368	200716_dc_IP79_NormalLung-W6Ab_DDA-OTOT-HCD_25cmPepMap2uTT_145m_01.raw	1	1	P13489|RINI_HUMAN				0
ATRSSAVRL	35.86	959.551	9	-0.2	480.783	29.24	81800000	1	16915	200716_dc_IP79_NormalLung-W6Ab_DDA-OTOT-HCD_25cmPepMap2uTT_145m_01.raw	1	1	P08670|VIME_HUMAN				1
KELEKTYSA	35.86	1067.55	9	0	534.782	29.34	751000000	1	16970	200716_dc_IP79_NormalLung-W6Ab_DDA-OTOT-HCD_25cmPepMap2uTT_145m_01.raw	3	3	P02545|LMNA_HUMAN				1
HAGEYGAEA	35.85	903.372	9	-0.8	904.379	29.73	39500000	1	17283	200716_dc_IP79_NormalLung-W6Ab_DDA-OTOT-HCD_25cmPepMap2uTT_145m_01.raw	2	2	P69905|HBA_HUMAN				0
SGKKLEDGPK	35.84	1057.58	10	-1.3	529.795	18.65	5580000	1	9315	200716_dc_IP79_NormalLung-W6Ab_DDA-OTOT-HCD_25cmPepMap2uTT_145m_01.raw	2	2	P68104|EF1A1_HUMAN:Q5VTE0|EF1A3_HUMAN				1
RLKEAYSVK	35.84	1092.63	9	-0.3	365.217	27.67	25000000	1	15844	200716_dc_IP79_NormalLung-W6Ab_DDA-OTOT-HCD_25cmPepMap2uTT_145m_01.raw	1	1	Q6P2Q9|PRP8_HUMAN				1
MPKKSIKKLVL	35.84	1283.84	11	-0.5	428.952	35.19	8550000	1	21172	200716_dc_IP79_NormalLung-W6Ab_DDA-OTOT-HCD_25cmPepMap2uTT_145m_01.raw	1	1	P52948|NUP98_HUMAN				0
SLADAINTEFK	35.84	1207.61	11	-1.1	604.811	73.52	0	1	48258	200716_dc_IP79_NormalLung-W6Ab_DDA-OTOT-HCD_25cmPepMap2uTT_145m_01.raw	0	0	P08670|VIME_HUMAN				1
TVKKAARVIIEK	35.84	1354.87	12	-1.3	452.629	28.05	5930000	1	16093	200716_dc_IP79_NormalLung-W6Ab_DDA-OTOT-HCD_25cmPepMap2uTT_145m_01.raw	1	1	P08708|RS17_HUMAN				0
AEAVFRAITIA	35.84	1160.66	11	-0.1	581.335	74	45200000	1	48487	200716_dc_IP79_NormalLung-W6Ab_DDA-OTOT-HCD_25cmPepMap2uTT_145m_01.raw	1	1	Q14195|DPYL3_HUMAN:Q14194|DPYL1_HUMAN				1
KVKTPEMIIQK	35.83	1313.77	11	-2	438.931	38.46	6170000	1	23410	200716_dc_IP79_NormalLung-W6Ab_DDA-OTOT-HCD_25cmPepMap2uTT_145m_01.raw	1	1	Q09666|AHNK_HUMAN				1
IPYHSEVPVSL	35.82	1239.65	11	-1.7	620.831	68.4	70000000	1	44640	200716_dc_IP79_NormalLung-W6Ab_DDA-OTOT-HCD_25cmPepMap2uTT_145m_01.raw	1	1	Q01082|SPTB2_HUMAN				1
HDSSDHHTFKK	35.82	1337.61	11	-0.5	446.877	13.93	351000	1	6093	200716_dc_IP79_NormalLung-W6Ab_DDA-OTOT-HCD_25cmPepMap2uTT_145m_01.raw	1	1	Q15293|RCN1_HUMAN				0
KVVNPLFEK	35.82	1072.63	9	-1.4	537.321	45.8	3340000	1	28756	200716_dc_IP79_NormalLung-W6Ab_DDA-OTOT-HCD_25cmPepMap2uTT_145m_01.raw	1	1	P62424|RL7A_HUMAN				1
TGHGKYEKVL	35.82	1130.61	10	-2.1	377.876	29.39	4730000	1	17093	200716_dc_IP79_NormalLung-W6Ab_DDA-OTOT-HCD_25cmPepMap2uTT_145m_01.raw	1	1	P33241|LSP1_HUMAN				0
AASGEAKPK	35.81	857.461	9	0.1	429.738	11.53	1150000	1	4331	200716_dc_IP79_NormalLung-W6Ab_DDA-OTOT-HCD_25cmPepMap2uTT_145m_01.raw	1	1	P16403|H12_HUMAN:P10412|H14_HUMAN:P16401|H15_HUMAN				0
MYLSPVRSPK	35.8	1176.63	10	-1.5	589.323	43.97	11400000	1	27492	200716_dc_IP79_NormalLung-W6Ab_DDA-OTOT-HCD_25cmPepMap2uTT_145m_01.raw	2	2	P06400|RB_HUMAN				1
RTPSFLKKSK	35.8	1190.71	10	-0.6	397.911	26.33	0	1	14857	200716_dc_IP79_NormalLung-W6Ab_DDA-OTOT-HCD_25cmPepMap2uTT_145m_01.raw	0	0	P35611|ADDA_HUMAN:P35612|ADDB_HUMAN				1
SYDSYATHNE	35.79	1185.46	10	-0.8	593.736	38.83	4350000	1	23784	200716_dc_IP79_NormalLung-W6Ab_DDA-OTOT-HCD_25cmPepMap2uTT_145m_01.raw	1	1	Q14011|CIRBP_HUMAN				1
VPRKPVKHTAM(+15.99)	35.79	1278.72	11	-2.8	427.247	20.41	4430000	1	10880	200716_dc_IP79_NormalLung-W6Ab_DDA-OTOT-HCD_25cmPepMap2uTT_145m_01.raw	1	1	P21333|FLNA_HUMAN	Oxidation (M)	M11:Oxidation (M):1000.00		0
KPAEYGYVSL	35.78	1125.57	10	0.1	563.793	62.41	7590000	1	40442	200716_dc_IP79_NormalLung-W6Ab_DDA-OTOT-HCD_25cmPepMap2uTT_145m_01.raw	1	1	P17676|CEBPB_HUMAN				1
TVGM(+15.99)NFKTPR	35.76	1165.59	10	-1.1	389.537	35.13	28100000	1	21045	200716_dc_IP79_NormalLung-W6Ab_DDA-OTOT-HCD_25cmPepMap2uTT_145m_01.raw	2	2	P08708|RS17_HUMAN	Oxidation (M)	M4:Oxidation (M):1000.00		0
SFKDFAKSK	35.76	1056.56	9	-1.5	529.287	31.3	37400000	1	18453	200716_dc_IP79_NormalLung-W6Ab_DDA-OTOT-HCD_25cmPepMap2uTT_145m_01.raw	2	2	O75995|SASH3_HUMAN				0
Q(-17.03)ENSSDFQSNIA	35.76	1321.54	12	-1	661.778	76.62	3930000	1	50397	200716_dc_IP79_NormalLung-W6Ab_DDA-OTOT-HCD_25cmPepMap2uTT_145m_01.raw	1	1	P31943|HNRH1_HUMAN	Pyro-glu from Q	Q1:Pyro-glu from Q:1000.00		0
EEIQKQTQA	35.75	1073.54	9	-1.5	537.774	28.45	15400000	1	16408	200716_dc_IP79_NormalLung-W6Ab_DDA-OTOT-HCD_25cmPepMap2uTT_145m_01.raw	1	1	Q9NUV9|GIMA4_HUMAN				1
SVQETVLPIKKR	35.74	1396.84	12	-0.9	466.62	39.42	1350000	1	24223	200716_dc_IP79_NormalLung-W6Ab_DDA-OTOT-HCD_25cmPepMap2uTT_145m_01.raw	1	1	P51608|MECP2_HUMAN				0
ERSGVSLAALKK	35.74	1257.74	12	0.6	420.254	37.01	760000	1	22521	200716_dc_IP79_NormalLung-W6Ab_DDA-OTOT-HCD_25cmPepMap2uTT_145m_01.raw	1	1	P16403|H12_HUMAN:P10412|H14_HUMAN:P16402|H13_HUMAN				1
LPYNNKDRDAL	35.74	1317.67	11	-1.4	659.84	42.06	29200000	1	26076	200716_dc_IP79_NormalLung-W6Ab_DDA-OTOT-HCD_25cmPepMap2uTT_145m_01.raw	2	2	Q05195|MAD1_HUMAN				1
SESEDRLVA	35.74	1004.48	9	-0.6	1005.48	39.27	79800000	1	24077	200716_dc_IP79_NormalLung-W6Ab_DDA-OTOT-HCD_25cmPepMap2uTT_145m_01.raw	2	2	Q9ULG6|CCPG1_HUMAN				1
Q(-17.03)YVVRKPLNK	35.72	1226.71	10	-0.7	409.911	40.44	56500000	1	24877	200716_dc_IP79_NormalLung-W6Ab_DDA-OTOT-HCD_25cmPepMap2uTT_145m_01.raw	2	2	P62753|RS6_HUMAN	Pyro-glu from Q	Q1:Pyro-glu from Q:1000.00		0
SVQAPSYGARP	35.72	1131.57	11	-0.5	566.791	43.19	2050000	1	26942	200716_dc_IP79_NormalLung-W6Ab_DDA-OTOT-HCD_25cmPepMap2uTT_145m_01.raw	1	1	P05783|K1C18_HUMAN				0
AVKVLQKKAILK	35.72	1337.91	12	-0.8	446.978	30.81	3300000	1	18113	200716_dc_IP79_NormalLung-W6Ab_DDA-OTOT-HCD_25cmPepMap2uTT_145m_01.raw	1	1	O00141|SGK1_HUMAN				0
APLLRGAVFF	35.7	1089.63	10	-1	545.823	85.52	1560000	1	56704	200716_dc_IP79_NormalLung-W6Ab_DDA-OTOT-HCD_25cmPepMap2uTT_145m_01.raw	1	1	P49815|TSC2_HUMAN				0
KYKDKYLAK	35.7	1155.67	9	0.2	386.229	25.66	24000000	1	14375	200716_dc_IP79_NormalLung-W6Ab_DDA-OTOT-HCD_25cmPepMap2uTT_145m_01.raw	1	1	Q00013|EM55_HUMAN				0
NPKIAVSKM(+15.99)	35.7	1002.55	9	-1.6	502.283	28.5	3800000	1	16429	200716_dc_IP79_NormalLung-W6Ab_DDA-OTOT-HCD_25cmPepMap2uTT_145m_01.raw	1	1	Q14839|CHD4_HUMAN	Oxidation (M)	M9:Oxidation (M):1000.00		0
RVKENELQYLK	35.69	1418.79	11	-0.4	473.937	39.56	3410000	1	24293	200716_dc_IP79_NormalLung-W6Ab_DDA-OTOT-HCD_25cmPepMap2uTT_145m_01.raw	1	1	Q9H2D6|TARA_HUMAN				0
GTGASGSFKL	35.69	923.471	10	0	462.743	48.84	22800000	1	30900	200716_dc_IP79_NormalLung-W6Ab_DDA-OTOT-HCD_25cmPepMap2uTT_145m_01.raw	2	2	P16403|H12_HUMAN:P10412|H14_HUMAN:P16402|H13_HUMAN:P16401|H15_HUMAN:Q02539|H11_HUMAN:P22492|H1T_HUMAN				1
IPKLPAVSF	35.68	970.585	9	-2	486.299	78.6	78600000	1	51774	200716_dc_IP79_NormalLung-W6Ab_DDA-OTOT-HCD_25cmPepMap2uTT_145m_01.raw	1	1	O96009|NAPSA_HUMAN				0
HVGQAGVQIGNA	35.68	1149.59	12	-1.2	575.801	42.6	786000	1	26494	200716_dc_IP79_NormalLung-W6Ab_DDA-OTOT-HCD_25cmPepMap2uTT_145m_01.raw	1	1	P68363|TBA1B_HUMAN:Q71U36|TBA1A_HUMAN:Q9BQE3|TBA1C_HUMAN:P0DPH8|TBA3D_HUMAN:P0DPH7|TBA3C_HUMAN:Q6PEY2|TBA3E_HUMAN:Q9NY65|TBA8_HUMAN				1
TGNSILGQR	35.67	944.504	9	-1.4	473.259	39.07	2820000	1	23974	200716_dc_IP79_NormalLung-W6Ab_DDA-OTOT-HCD_25cmPepMap2uTT_145m_01.raw	1	1	Q8WWP7|GIMA1_HUMAN				0
LPQEQKAKI	35.66	1053.62	9	-0.8	527.816	31.89	27600000	1	18841	200716_dc_IP79_NormalLung-W6Ab_DDA-OTOT-HCD_25cmPepMap2uTT_145m_01.raw	2	2	P35221|CTNA1_HUMAN				1
SPSQKKPVSK	35.66	1084.62	10	-0.7	362.548	13.54	542000	1	5802	200716_dc_IP79_NormalLung-W6Ab_DDA-OTOT-HCD_25cmPepMap2uTT_145m_01.raw	1	1	O75367|H2AY_HUMAN				0
M(+15.99)PKMKM(+15.99)PTF	35.66	1141.53	9	-2.5	571.773	41.42	2520000	1	25671	200716_dc_IP79_NormalLung-W6Ab_DDA-OTOT-HCD_25cmPepMap2uTT_145m_01.raw	1	1	Q09666|AHNK_HUMAN	Oxidation (M)	M1:Oxidation (M):50.22;M6:Oxidation (M):5.99		0
GTDTLREVQLR	35.65	1286.69	11	-0.5	429.905	46.92	2510000	1	29562	200716_dc_IP79_NormalLung-W6Ab_DDA-OTOT-HCD_25cmPepMap2uTT_145m_01.raw	1	1	P08311|CATG_HUMAN				0
HM(+15.99)YHSLYLKVK	35.65	1433.75	11	-0.9	359.444	36.32	8770000	1	21943	200716_dc_IP79_NormalLung-W6Ab_DDA-OTOT-HCD_25cmPepMap2uTT_145m_01.raw	2	2	P84098|RL19_HUMAN	Oxidation (M)	M2:Oxidation (M):1000.00		0
AESGVQHKP	35.65	951.477	9	-1.8	476.745	22.32	8440000	1	12035	200716_dc_IP79_NormalLung-W6Ab_DDA-OTOT-HCD_25cmPepMap2uTT_145m_01.raw	1	1	P61106|RAB14_HUMAN				1
RPQPGRENF	35.65	1099.55	9	-0.6	367.524	30.96	114000000	1	18142	200716_dc_IP79_NormalLung-W6Ab_DDA-OTOT-HCD_25cmPepMap2uTT_145m_01.raw	2	2	P37802|TAGL2_HUMAN				1
AASGEAKPKAK	35.64	1056.59	11	0	529.304	11.72	400000	1	4506	200716_dc_IP79_NormalLung-W6Ab_DDA-OTOT-HCD_25cmPepMap2uTT_145m_01.raw	1	1	P10412|H14_HUMAN:P16401|H15_HUMAN				0
RPLHPKEKVL	35.62	1215.75	10	-1.3	406.255	27.82	3750000	1	15970	200716_dc_IP79_NormalLung-W6Ab_DDA-OTOT-HCD_25cmPepMap2uTT_145m_01.raw	1	1	Q8WWN8|ARAP3_HUMAN				0
LPQGEKVQAM	35.62	1099.57	10	-1.4	550.791	43.88	1860000	1	27408	200716_dc_IP79_NormalLung-W6Ab_DDA-OTOT-HCD_25cmPepMap2uTT_145m_01.raw	1	1	P15104|GLNA_HUMAN				1
M(+15.99)VVPAALKVVR	35.61	1197.73	11	-1	400.249	51.16	1600000	1	32607	200716_dc_IP79_NormalLung-W6Ab_DDA-OTOT-HCD_25cmPepMap2uTT_145m_01.raw	1	1	P40429|RL13A_HUMAN:Q6NVV1|R13P3_HUMAN	Oxidation (M)	M1:Oxidation (M):1000.00		0
HLYDPKNH	35.61	1022.49	8	-1.3	512.253	27.18	17600000	1	15460	200716_dc_IP79_NormalLung-W6Ab_DDA-OTOT-HCD_25cmPepMap2uTT_145m_01.raw	1	1	Q99439|CNN2_HUMAN				1
SYN(+.98)RGDSTFESK	35.61	1390.6	12	-1.2	696.307	40.68	1660000	1	25135	200716_dc_IP79_NormalLung-W6Ab_DDA-OTOT-HCD_25cmPepMap2uTT_145m_01.raw	1	1	P02671|FIBA_HUMAN	Deamidation (NQ)	N3:Deamidation (NQ):1000.00		0
YASGRTTGIVLDS	35.61	1338.68	13	-0.7	670.346	52.73	2750000	1	33715	200716_dc_IP79_NormalLung-W6Ab_DDA-OTOT-HCD_25cmPepMap2uTT_145m_01.raw	1	1	P68032|ACTC_HUMAN:P62736|ACTA_HUMAN:P68133|ACTS_HUMAN:P63267|ACTH_HUMAN				0
GVYPGHRPGL	35.61	1051.56	10	-1	526.785	39.85	317000000	1	24450	200716_dc_IP79_NormalLung-W6Ab_DDA-OTOT-HCD_25cmPepMap2uTT_145m_01.raw	2	2	Q63HR2|TNS2_HUMAN				0
HPYDSSHKEF	35.59	1245.54	10	-1.4	416.187	30.28	4520000	1	17694	200716_dc_IP79_NormalLung-W6Ab_DDA-OTOT-HCD_25cmPepMap2uTT_145m_01.raw	1	1	Q9P2E3|ZNFX1_HUMAN				1
HEMTKTASA	35.57	974.449	9	-1.8	488.231	24.77	10900000	1	13671	200716_dc_IP79_NormalLung-W6Ab_DDA-OTOT-HCD_25cmPepMap2uTT_145m_01.raw	1	1	Q9Y5U8|MPC1_HUMAN				1
KVNEIAKHK	35.56	1065.63	9	0.1	356.217	14.74	14100000	1	6601	200716_dc_IP79_NormalLung-W6Ab_DDA-OTOT-HCD_25cmPepMap2uTT_145m_01.raw	2	2	Q13561|DCTN2_HUMAN				1
LPKQEKRHVL	35.55	1246.75	10	-1.4	416.59	26.78	63300000	1	15184	200716_dc_IP79_NormalLung-W6Ab_DDA-OTOT-HCD_25cmPepMap2uTT_145m_01.raw	1	1	Q15011|HERP1_HUMAN				0
VPKPIGGVVVF	35.55	1110.68	11	-1.1	556.347	75.09	31600000	1	49500	200716_dc_IP79_NormalLung-W6Ab_DDA-OTOT-HCD_25cmPepMap2uTT_145m_01.raw	1	1	Q10570|CPSF1_HUMAN				1
AGGTKPKKPVG	35.55	1038.62	11	-0.4	520.316	18.6	3840000	1	9214	200716_dc_IP79_NormalLung-W6Ab_DDA-OTOT-HCD_25cmPepMap2uTT_145m_01.raw	1	1	P16403|H12_HUMAN				0
SLGSALRPS	35.55	886.487	9	-0.7	887.494	43.68	70400000	1	27179	200716_dc_IP79_NormalLung-W6Ab_DDA-OTOT-HCD_25cmPepMap2uTT_145m_01.raw	2	2	P08670|VIME_HUMAN				1
HGNSGM(+15.99)VRAK	35.54	1071.52	10	-0.8	358.182	11.77	538000	1	4560	200716_dc_IP79_NormalLung-W6Ab_DDA-OTOT-HCD_25cmPepMap2uTT_145m_01.raw	1	1	P18077|RL35A_HUMAN	Oxidation (M)	M6:Oxidation (M):1000.00		0
PTKETIEQEKRSE	35.54	1573.79	13	-0.4	525.605	38.42	0	1	23512	200716_dc_IP79_NormalLung-W6Ab_DDA-OTOT-HCD_25cmPepMap2uTT_145m_01.raw	0	0	P63313|TYB10_HUMAN				1
KPVYPGQTL	35.53	1001.55	9	-1.5	501.784	47.51	8590000	1	29934	200716_dc_IP79_NormalLung-W6Ab_DDA-OTOT-HCD_25cmPepMap2uTT_145m_01.raw	1	1	P51659|DHB4_HUMAN				1
TFHVKKIREGQVE	35.53	1569.86	13	-0.8	524.294	33.81	5880000	1	20218	200716_dc_IP79_NormalLung-W6Ab_DDA-OTOT-HCD_25cmPepMap2uTT_145m_01.raw	1	1	Q6NZI2|CAVN1_HUMAN				0
SAVGHEYQSK	35.53	1104.52	10	-0.6	553.267	26.13	1660000	1	14705	200716_dc_IP79_NormalLung-W6Ab_DDA-OTOT-HCD_25cmPepMap2uTT_145m_01.raw	1	1	Q14247|SRC8_HUMAN				0
MPKFSVPGF	35.53	1008.51	9	-0.5	505.262	82.79	22500000	1	54915	200716_dc_IP79_NormalLung-W6Ab_DDA-OTOT-HCD_25cmPepMap2uTT_145m_01.raw	1	1	Q09666|AHNK_HUMAN				0
HQKSEFVEK	35.52	1130.57	9	-0.8	377.864	25.46	32300000	1	14218	200716_dc_IP79_NormalLung-W6Ab_DDA-OTOT-HCD_25cmPepMap2uTT_145m_01.raw	2	2	O15553|MEFV_HUMAN				1
LPSGSKKVI	35.51	927.575	9	-1.1	464.794	31.89	31900000	1	18801	200716_dc_IP79_NormalLung-W6Ab_DDA-OTOT-HCD_25cmPepMap2uTT_145m_01.raw	1	1	P62917|RL8_HUMAN				0
HQKISSGK	35.5	883.487	8	-1.1	442.751	11.82	597000	1	4591	200716_dc_IP79_NormalLung-W6Ab_DDA-OTOT-HCD_25cmPepMap2uTT_145m_01.raw	1	1	O95810|CAVN2_HUMAN				0
GEYEWVHKP	35.49	1143.53	9	-1.8	572.774	47.22	9340000	1	29620	200716_dc_IP79_NormalLung-W6Ab_DDA-OTOT-HCD_25cmPepMap2uTT_145m_01.raw	1	1	Q9H9Y2|RPF1_HUMAN				1
HASDRIIAL	35.49	994.556	9	-1.4	995.562	47.61	135000000	1	30062	200716_dc_IP79_NormalLung-W6Ab_DDA-OTOT-HCD_25cmPepMap2uTT_145m_01.raw	2	2	P29401|TKT_HUMAN				1
LPKSPPYTAF	35.49	1119.6	10	-2	560.804	64.52	20000000	1	42009	200716_dc_IP79_NormalLung-W6Ab_DDA-OTOT-HCD_25cmPepMap2uTT_145m_01.raw	1	1	P23588|IF4B_HUMAN				1
SIDLKDKYKN	35.48	1222.66	10	-1.7	408.558	33.19	15000000	1	19796	200716_dc_IP79_NormalLung-W6Ab_DDA-OTOT-HCD_25cmPepMap2uTT_145m_01.raw	1	1	P10809|CH60_HUMAN				0
TPTYGDLNH	35.48	1016.46	9	-1.3	509.235	43.73	7490000	1	27262	200716_dc_IP79_NormalLung-W6Ab_DDA-OTOT-HCD_25cmPepMap2uTT_145m_01.raw	1	1	P07437|TBB5_HUMAN:P68371|TBB4B_HUMAN:P04350|TBB4A_HUMAN:Q9BVA1|TBB2B_HUMAN:Q13885|TBB2A_HUMAN:Q13509|TBB3_HUMAN:Q9BUF5|TBB6_HUMAN:Q3ZCM7|TBB8_HUMAN:A6NNZ2|TBB8L_HUMAN:Q9H4B7|TBB1_HUMAN				0
HYDPVVKQ	35.47	984.503	8	-0.5	493.259	30.57	3290000	1	17933	200716_dc_IP79_NormalLung-W6Ab_DDA-OTOT-HCD_25cmPepMap2uTT_145m_01.raw	1	1	O75394|RM33_HUMAN				0
KPATKTAEL	35.47	957.549	9	-1	479.781	26.73	14600000	1	15159	200716_dc_IP79_NormalLung-W6Ab_DDA-OTOT-HCD_25cmPepMap2uTT_145m_01.raw	1	1	P18583|SON_HUMAN				1
GTKYIFM(+15.99)VK	35.47	1101.59	9	-0.4	368.204	46.53	12800000	1	29258	200716_dc_IP79_NormalLung-W6Ab_DDA-OTOT-HCD_25cmPepMap2uTT_145m_01.raw	2	2	O15344|TRI18_HUMAN	Oxidation (M)	M7:Oxidation (M):1000.00		0
SFSSSAGPGLLK	35.47	1149.6	12	-0.1	575.809	56.09	10700000	1	36014	200716_dc_IP79_NormalLung-W6Ab_DDA-OTOT-HCD_25cmPepMap2uTT_145m_01.raw	1	1	P08729|K2C7_HUMAN				0
TEDIKLNKAEK	35.46	1287.7	11	-1.5	430.241	28.55	5820000	1	16479	200716_dc_IP79_NormalLung-W6Ab_DDA-OTOT-HCD_25cmPepMap2uTT_145m_01.raw	1	1	Q04637|IF4G1_HUMAN				0
TESLQANVQRL	35.46	1257.67	11	-0.4	629.841	55.45	2010000	1	35712	200716_dc_IP79_NormalLung-W6Ab_DDA-OTOT-HCD_25cmPepMap2uTT_145m_01.raw	1	1	P26373|RL13_HUMAN				0
TRVKLPSGSK	35.46	1071.64	10	-0.9	536.827	27.52	398000000	1	15578	200716_dc_IP79_NormalLung-W6Ab_DDA-OTOT-HCD_25cmPepMap2uTT_145m_01.raw	2	2	P62917|RL8_HUMAN				0
GLSLAALKKALAA	35.46	1225.78	13	-0.8	613.895	76.92	2140000	1	50663	200716_dc_IP79_NormalLung-W6Ab_DDA-OTOT-HCD_25cmPepMap2uTT_145m_01.raw	2	2	P16401|H15_HUMAN				0
RPKRPPLKEFF	35.45	1413.82	11	-1.9	472.281	44.02	16200000	1	27418	200716_dc_IP79_NormalLung-W6Ab_DDA-OTOT-HCD_25cmPepMap2uTT_145m_01.raw	1	1	Q9P265|DIP2B_HUMAN:Q14689|DIP2A_HUMAN				0
TAVYKVPP	35.45	873.496	8	-1.8	437.755	44.31	184000000	1	25142	200716_dc_IP79_NormalLung-W6Ab_DDA-OTOT-HCD_25cmPepMap2uTT_145m_01.raw	2	2	Q6NZI2|CAVN1_HUMAN				0
KFLPFKVVEK	35.44	1233.75	10	-1	412.256	51.45	3280000	1	32844	200716_dc_IP79_NormalLung-W6Ab_DDA-OTOT-HCD_25cmPepMap2uTT_145m_01.raw	1	1	P11021|BIP_HUMAN				1
FPM(+15.99)ELRQFL	35.44	1195.61	9	-0.5	598.81	84.42	20400000	1	56070	200716_dc_IP79_NormalLung-W6Ab_DDA-OTOT-HCD_25cmPepMap2uTT_145m_01.raw	1	1	P40763|STAT3_HUMAN	Oxidation (M)	M3:Oxidation (M):1000.00		0
VYIHPFHL	35.43	1024.55	8	-1.2	513.281	63.64	5260000	1	41383	200716_dc_IP79_NormalLung-W6Ab_DDA-OTOT-HCD_25cmPepMap2uTT_145m_01.raw	1	1	P01019|ANGT_HUMAN				0
NDYFVVHMK	35.42	1151.54	9	4.6	576.782	55.74	22500000	1	35476	200716_dc_IP79_NormalLung-W6Ab_DDA-OTOT-HCD_25cmPepMap2uTT_145m_01.raw	1	1	P60903|S10AA_HUMAN				0
RFKTITTAY	35.42	1099.6	9	0	550.808	43.53	64500000	1	27075	200716_dc_IP79_NormalLung-W6Ab_DDA-OTOT-HCD_25cmPepMap2uTT_145m_01.raw	2	2	P51153|RAB13_HUMAN				1
SLPKQASDTGSN	35.41	1203.57	12	-0.6	602.793	30.52	1830000	1	17903	200716_dc_IP79_NormalLung-W6Ab_DDA-OTOT-HCD_25cmPepMap2uTT_145m_01.raw	1	1	P20810|ICAL_HUMAN				0
VASEVYKAV	35.41	964.523	9	-0.3	483.269	44.91	6840000	1	28108	200716_dc_IP79_NormalLung-W6Ab_DDA-OTOT-HCD_25cmPepMap2uTT_145m_01.raw	1	1	Q96S52|PIGS_HUMAN				1
RTKELGYTVK	35.41	1193.68	10	-0.6	398.899	29.29	8310000	1	17009	200716_dc_IP79_NormalLung-W6Ab_DDA-OTOT-HCD_25cmPepMap2uTT_145m_01.raw	1	1	P30533|AMRP_HUMAN				1
RLVLSTLSGRPVK	35.41	1424.88	13	-1.7	475.967	45.5	5310000	1	28534	200716_dc_IP79_NormalLung-W6Ab_DDA-OTOT-HCD_25cmPepMap2uTT_145m_01.raw	1	1	Q9Y2P8|RCL1_HUMAN				1
GGAGVGSMTK	35.41	863.417	10	-1.2	432.715	29.88	7100000	1	17430	200716_dc_IP79_NormalLung-W6Ab_DDA-OTOT-HCD_25cmPepMap2uTT_145m_01.raw	1	1	P39019|RS19_HUMAN				0
NPYFENKVL	35.4	1122.57	9	-1.3	562.292	63.69	16400000	1	41343	200716_dc_IP79_NormalLung-W6Ab_DDA-OTOT-HCD_25cmPepMap2uTT_145m_01.raw	1	1	Q01105|SET_HUMAN				0
AVKNGDYITVK	35.4	1206.66	11	-0.6	403.227	37.35	2360000	1	22737	200716_dc_IP79_NormalLung-W6Ab_DDA-OTOT-HCD_25cmPepMap2uTT_145m_01.raw	1	1	Q99549|MPP8_HUMAN				0
SHKDEVVKIQS	35.39	1268.67	11	-0.2	423.898	29.39	5310000	1	17088	200716_dc_IP79_NormalLung-W6Ab_DDA-OTOT-HCD_25cmPepMap2uTT_145m_01.raw	1	1	P46940|IQGA1_HUMAN				0
HFDLSHGSA	35.39	969.43	9	-1.3	485.722	37.95	9870000	1	23105	200716_dc_IP79_NormalLung-W6Ab_DDA-OTOT-HCD_25cmPepMap2uTT_145m_01.raw	1	1	P69905|HBA_HUMAN				1
VPRQPTVTSV	35.39	1082.61	10	7.3	542.315	44.39	0	1	27754	200716_dc_IP79_NormalLung-W6Ab_DDA-OTOT-HCD_25cmPepMap2uTT_145m_01.raw	0	0	Q96HC4|PDLI5_HUMAN				1
TAADIFKQY	35.39	1055.53	9	-1.2	528.771	65.17	45300000	1	42433	200716_dc_IP79_NormalLung-W6Ab_DDA-OTOT-HCD_25cmPepMap2uTT_145m_01.raw	1	1	Q8N3U4|STAG2_HUMAN				1
SPKVSDTVVEPY	35.39	1319.66	12	-0.9	660.837	55.1	10300000	1	35342	200716_dc_IP79_NormalLung-W6Ab_DDA-OTOT-HCD_25cmPepMap2uTT_145m_01.raw	1	1	P07437|TBB5_HUMAN:P68371|TBB4B_HUMAN:P04350|TBB4A_HUMAN:Q9BVA1|TBB2B_HUMAN:Q13885|TBB2A_HUMAN:Q13509|TBB3_HUMAN:Q9BUF5|TBB6_HUMAN:Q3ZCM7|TBB8_HUMAN:A6NNZ2|TBB8L_HUMAN:Q9H4B7|TBB1_HUMAN				1
LVQNDTLLQVK	35.39	1269.73	11	-1.1	635.871	59.2	1150000	1	38337	200716_dc_IP79_NormalLung-W6Ab_DDA-OTOT-HCD_25cmPepMap2uTT_145m_01.raw	1	1	Q92522|H1X_HUMAN				0
TPNHVEHTL	35.39	1046.51	9	-1.2	524.264	29.78	4570000	1	17367	200716_dc_IP79_NormalLung-W6Ab_DDA-OTOT-HCD_25cmPepMap2uTT_145m_01.raw	1	1	Q9HBL0|TENS1_HUMAN				1
ELPSGKKYLR	35.39	1189.68	10	-0.2	397.568	34.94	128000000	1	21147	200716_dc_IP79_NormalLung-W6Ab_DDA-OTOT-HCD_25cmPepMap2uTT_145m_01.raw	2	2	P30041|PRDX6_HUMAN				0
TDGKVFQF	35.38	940.465	8	-1.4	471.239	64.13	135000000	1	41632	200716_dc_IP79_NormalLung-W6Ab_DDA-OTOT-HCD_25cmPepMap2uTT_145m_01.raw	1	1	P83731|RL24_HUMAN				1
NDFGNYNQQPS	35.38	1282.52	11	-0.5	642.268	53.37	8010000	1	34142	200716_dc_IP79_NormalLung-W6Ab_DDA-OTOT-HCD_25cmPepMap2uTT_145m_01.raw	1	1	P22626|ROA2_HUMAN				0
HTKPYVRSK	35.38	1114.62	9	-0.3	372.549	15.61	5760000	1	7251	200716_dc_IP79_NormalLung-W6Ab_DDA-OTOT-HCD_25cmPepMap2uTT_145m_01.raw	1	1	Q07020|RL18_HUMAN				0
QPYLARRPKL	35.37	1240.74	10	-0.4	414.587	39.07	8080000	1	23914	200716_dc_IP79_NormalLung-W6Ab_DDA-OTOT-HCD_25cmPepMap2uTT_145m_01.raw	1	1	Q96KA5|CLP1L_HUMAN				1
ALAAAGYDVEK	35.37	1106.56	11	-1	554.287	47.87	0	1	30237	200716_dc_IP79_NormalLung-W6Ab_DDA-OTOT-HCD_25cmPepMap2uTT_145m_01.raw	0	0	P16403|H12_HUMAN:P10412|H14_HUMAN:P16402|H13_HUMAN:Q02539|H11_HUMAN:P22492|H1T_HUMAN				1
APNPAPKEL	35.36	935.508	9	-1.6	468.76	39.7	5000000	1	24395	200716_dc_IP79_NormalLung-W6Ab_DDA-OTOT-HCD_25cmPepMap2uTT_145m_01.raw	1	1	Q53SF7|COBL1_HUMAN				1
NPKRQTLVF	35.36	1101.63	9	-0.8	551.822	42.6	85700000	1	26363	200716_dc_IP79_NormalLung-W6Ab_DDA-OTOT-HCD_25cmPepMap2uTT_145m_01.raw	2	2	Q9GZR7|DDX24_HUMAN				1
TVEQTATTTNK	35.36	1192.59	11	-1.7	597.303	28.01	760000	1	16106	200716_dc_IP79_NormalLung-W6Ab_DDA-OTOT-HCD_25cmPepMap2uTT_145m_01.raw	1	1	P08579|RU2B_HUMAN				0
KQKKPLVGKK	35.35	1152.77	10	-1.1	577.392	12.57	11400000	1	5072	200716_dc_IP79_NormalLung-W6Ab_DDA-OTOT-HCD_25cmPepMap2uTT_145m_01.raw	2	2	P36578|RL4_HUMAN				0
APSGEQLLRTL	35.35	1183.66	11	-1.5	592.834	70.98	0	1	46608	200716_dc_IP79_NormalLung-W6Ab_DDA-OTOT-HCD_25cmPepMap2uTT_145m_01.raw	0	0	O15230|LAMA5_HUMAN				0
AERGPITSA	35.35	900.466	9	-1.3	901.472	32.23	82200000	1	19068	200716_dc_IP79_NormalLung-W6Ab_DDA-OTOT-HCD_25cmPepMap2uTT_145m_01.raw	2	2	P17813|EGLN_HUMAN				0
VPFLKKVGF	35.35	1033.63	9	-1.6	517.823	65.08	6850000	1	42230	200716_dc_IP79_NormalLung-W6Ab_DDA-OTOT-HCD_25cmPepMap2uTT_145m_01.raw	1	1	Q8IYD1|ERF3B_HUMAN:P15170|ERF3A_HUMAN				1
EEVVSREV	35.34	945.477	8	-1.5	946.482	39.02	38000000	1	23931	200716_dc_IP79_NormalLung-W6Ab_DDA-OTOT-HCD_25cmPepMap2uTT_145m_01.raw	2	2	P02545|LMNA_HUMAN				1
SLSPQSSLPASR	35.34	1228.64	12	-1.2	615.327	46.63	5350000	1	29341	200716_dc_IP79_NormalLung-W6Ab_DDA-OTOT-HCD_25cmPepMap2uTT_145m_01.raw	1	1	Q96JY6|PDLI2_HUMAN				0
EEQEGGGARVP	35.34	1127.52	11	0.1	564.768	34.4	1040000	1	20710	200716_dc_IP79_NormalLung-W6Ab_DDA-OTOT-HCD_25cmPepMap2uTT_145m_01.raw	1	1	Q96RK0|CIC_HUMAN				0
RPREAEVRF	35.32	1158.63	9	-0.6	387.216	32.9	31800000	1	19536	200716_dc_IP79_NormalLung-W6Ab_DDA-OTOT-HCD_25cmPepMap2uTT_145m_01.raw	1	1	Q13438|OS9_HUMAN				1
KGVTLGFRYK	35.32	1167.68	10	-1.4	390.232	42.84	14900000	1	26593	200716_dc_IP79_NormalLung-W6Ab_DDA-OTOT-HCD_25cmPepMap2uTT_145m_01.raw	2	2	P32969|RL9_HUMAN				1
SVDIPLDKTVVN	35.32	1298.71	12	-0.8	650.361	66.39	2080000	1	43368	200716_dc_IP79_NormalLung-W6Ab_DDA-OTOT-HCD_25cmPepMap2uTT_145m_01.raw	1	1	P61353|RL27_HUMAN				0
KTTILYKLK	35.32	1106.71	9	-1.7	369.909	36.77	179000000	1	22204	200716_dc_IP79_NormalLung-W6Ab_DDA-OTOT-HCD_25cmPepMap2uTT_145m_01.raw	2	2	P62330|ARF6_HUMAN:Q8IVW1|ARL17_HUMAN:P84085|ARF5_HUMAN:P18085|ARF4_HUMAN:P61204|ARF3_HUMAN:P84077|ARF1_HUMAN				0
KTTLLYKLK	35.32	1106.71	9	-1.7	369.909	36.77	179000000	1	22204	200716_dc_IP79_NormalLung-W6Ab_DDA-OTOT-HCD_25cmPepMap2uTT_145m_01.raw	2	2	Q969Q4|ARL11_HUMAN				1
AAYYHPSYL	35.32	1083.5	9	-1.3	542.758	58.65	9240000	1	37811	200716_dc_IP79_NormalLung-W6Ab_DDA-OTOT-HCD_25cmPepMap2uTT_145m_01.raw	1	1	Q14687|GSE1_HUMAN				1
KPYVTKEEL	35.3	1105.6	9	-0.9	553.808	37.75	4640000	1	23035	200716_dc_IP79_NormalLung-W6Ab_DDA-OTOT-HCD_25cmPepMap2uTT_145m_01.raw	1	1	Q13813|SPTN1_HUMAN				0
AEAVLKHIA	35.3	950.555	9	-0.1	476.285	37.01	4290000	1	22480	200716_dc_IP79_NormalLung-W6Ab_DDA-OTOT-HCD_25cmPepMap2uTT_145m_01.raw	1	1	A0AVT1|UBA6_HUMAN				1
GYDVEKNNS	35.3	1024.45	9	-1.2	513.23	30.62	66800000	1	17905	200716_dc_IP79_NormalLung-W6Ab_DDA-OTOT-HCD_25cmPepMap2uTT_145m_01.raw	2	2	P16403|H12_HUMAN:P10412|H14_HUMAN:P16402|H13_HUMAN:P16401|H15_HUMAN:Q02539|H11_HUMAN:P22492|H1T_HUMAN				0
SPKIHARVF	35.29	1053.61	9	-1.5	352.209	35.04	4600000	1	21085	200716_dc_IP79_NormalLung-W6Ab_DDA-OTOT-HCD_25cmPepMap2uTT_145m_01.raw	1	1	Q2PPJ7|RGPA2_HUMAN				0
KPKPTPDYL	35.28	1057.58	9	-0.6	529.797	37.2	64300000	1	22822	200716_dc_IP79_NormalLung-W6Ab_DDA-OTOT-HCD_25cmPepMap2uTT_145m_01.raw	1	1	Q96PU8|QKI_HUMAN				1
TPYVSHVGL	35.28	971.508	9	-0.3	486.761	55.45	1650000	1	35671	200716_dc_IP79_NormalLung-W6Ab_DDA-OTOT-HCD_25cmPepMap2uTT_145m_01.raw	1	1	Q93074|MED12_HUMAN				0
APAPAEKTPV	35.27	979.534	10	-1.8	490.773	35.09	2800000	1	21159	200716_dc_IP79_NormalLung-W6Ab_DDA-OTOT-HCD_25cmPepMap2uTT_145m_01.raw	1	1	P10412|H14_HUMAN				1
TYLKYSIKA	35.27	1085.61	9	-1.4	543.813	47.71	7250000	1	30102	200716_dc_IP79_NormalLung-W6Ab_DDA-OTOT-HCD_25cmPepMap2uTT_145m_01.raw	1	1	Q92522|H1X_HUMAN				0
TAKPKAAKPK	35.27	1038.65	10	-0.7	520.334	12.39	32800000	1	5013	200716_dc_IP79_NormalLung-W6Ab_DDA-OTOT-HCD_25cmPepMap2uTT_145m_01.raw	1	1	P10412|H14_HUMAN				1
KKVKKPATAAGTK	35.26	1326.83	13	-1.2	443.285	13.16	1990000	1	5875	200716_dc_IP79_NormalLung-W6Ab_DDA-OTOT-HCD_25cmPepMap2uTT_145m_01.raw	1	1	P16402|H13_HUMAN				0
SAPGGGSKVPQKK	35.25	1239.69	13	-0.7	414.238	24.72	6020000	1	13699	200716_dc_IP79_NormalLung-W6Ab_DDA-OTOT-HCD_25cmPepMap2uTT_145m_01.raw	2	2	P06748|NPM_HUMAN				0
TVGMNFKTP	35.25	993.495	9	-0.8	497.755	55	8720000	1	35207	200716_dc_IP79_NormalLung-W6Ab_DDA-OTOT-HCD_25cmPepMap2uTT_145m_01.raw	1	1	P08708|RS17_HUMAN				0
TPGPGAQSALRA	35.24	1124.59	12	-1.7	563.303	41.91	5790000	1	25971	200716_dc_IP79_NormalLung-W6Ab_DDA-OTOT-HCD_25cmPepMap2uTT_145m_01.raw	1	1	P62263|RS14_HUMAN				0
YQKQPTIFQNK	35.24	1393.74	11	-0.5	465.586	40.39	715000	1	24960	200716_dc_IP79_NormalLung-W6Ab_DDA-OTOT-HCD_25cmPepMap2uTT_145m_01.raw	1	1	P62280|RS11_HUMAN				1
EEMPQVHTP	35.24	1066.48	9	-0.9	534.244	49.48	92800000	1	31315	200716_dc_IP79_NormalLung-W6Ab_DDA-OTOT-HCD_25cmPepMap2uTT_145m_01.raw	1	1	P25205|MCM3_HUMAN				1
PRKIEEIKDF	35.24	1273.7	10	-1.3	425.574	42.55	2210000	1	26469	200716_dc_IP79_NormalLung-W6Ab_DDA-OTOT-HCD_25cmPepMap2uTT_145m_01.raw	1	1	P63173|RL38_HUMAN				1
HGSLGFLPR	35.24	982.535	9	-3.9	492.273	50.2	0	1	31893	200716_dc_IP79_NormalLung-W6Ab_DDA-OTOT-HCD_25cmPepMap2uTT_145m_01.raw	0	0	P39023|RL3_HUMAN				1
GC(+119.00)AADQAKQL	35.23	1122.48	10	-1.4	562.246	29.29	1410000	1	17029	200716_dc_IP79_NormalLung-W6Ab_DDA-OTOT-HCD_25cmPepMap2uTT_145m_01.raw	1	1	Q8IYN6|UBAD2_HUMAN:Q8TB05|UBAD1_HUMAN	Cysteinylation	C2:Cysteinylation:1000.00		0
AGAGKVTK	35.23	730.434	8	-0.9	366.224	12.16	1130000	1	4812	200716_dc_IP79_NormalLung-W6Ab_DDA-OTOT-HCD_25cmPepMap2uTT_145m_01.raw	1	1	P68104|EF1A1_HUMAN:Q5VTE0|EF1A3_HUMAN				0
KLPKQPVIVK	35.21	1148.76	10	0.2	383.929	34.5	53400000	1	20692	200716_dc_IP79_NormalLung-W6Ab_DDA-OTOT-HCD_25cmPepMap2uTT_145m_01.raw	2	2	P46776|RL27A_HUMAN				1
ANVVRNISY	35.21	1034.55	9	-0.3	1035.56	48.4	49200000	1	30614	200716_dc_IP79_NormalLung-W6Ab_DDA-OTOT-HCD_25cmPepMap2uTT_145m_01.raw	2	2	P28065|PSB9_HUMAN				1
MPKFSM(+15.99)PSL	35.21	1052.5	9	-0.4	527.259	64.76	5730000	1	42162	200716_dc_IP79_NormalLung-W6Ab_DDA-OTOT-HCD_25cmPepMap2uTT_145m_01.raw	1	1	Q09666|AHNK_HUMAN	Oxidation (M)	M6:Oxidation (M):31.67		0
SYTTPKKNK	35.2	1065.58	9	-0.4	533.798	15.81	37600000	1	7539	200716_dc_IP79_NormalLung-W6Ab_DDA-OTOT-HCD_25cmPepMap2uTT_145m_01.raw	2	2	P62979|RS27A_HUMAN				0
AEFPMSPVTSA	35.2	1135.52	11	-1.6	568.767	77.66	1610000	1	51187	200716_dc_IP79_NormalLung-W6Ab_DDA-OTOT-HCD_25cmPepMap2uTT_145m_01.raw	1	1	Q8N423|LIRB2_HUMAN:O75022|LIRB3_HUMAN:Q6PI73|LIRA6_HUMAN:P59901|LIRA4_HUMAN:O75019|LIRA1_HUMAN:Q8N6C8|LIRA3_HUMAN				0
KPSDFHFLKVI	35.19	1329.74	11	-0.4	444.255	66.81	4580000	1	43606	200716_dc_IP79_NormalLung-W6Ab_DDA-OTOT-HCD_25cmPepMap2uTT_145m_01.raw	1	1	O00141|SGK1_HUMAN				0
NLSKEDDVR	35.18	1074.53	9	-1.5	538.272	27.67	41500000	1	15860	200716_dc_IP79_NormalLung-W6Ab_DDA-OTOT-HCD_25cmPepMap2uTT_145m_01.raw	2	2	P62753|RS6_HUMAN				1
HGGGWGQP	35.16	794.346	8	-1.3	795.352	35.44	5730000	1	21393	200716_dc_IP79_NormalLung-W6Ab_DDA-OTOT-HCD_25cmPepMap2uTT_145m_01.raw	1	1	P04156|PRIO_HUMAN				0
YLKVKGNVFK	35.16	1194.71	10	-0.2	399.245	38.97	1610000	1	23878	200716_dc_IP79_NormalLung-W6Ab_DDA-OTOT-HCD_25cmPepMap2uTT_145m_01.raw	1	1	P84098|RL19_HUMAN				1
SYTTPKKNKH	35.15	1202.64	10	0.2	602.328	13.3	6920000	1	5545	200716_dc_IP79_NormalLung-W6Ab_DDA-OTOT-HCD_25cmPepMap2uTT_145m_01.raw	2	2	P62979|RS27A_HUMAN				0
KFLNILEKPKK	35.15	1356.85	11	-1	453.29	41.17	2960000	1	25450	200716_dc_IP79_NormalLung-W6Ab_DDA-OTOT-HCD_25cmPepMap2uTT_145m_01.raw	1	1	Q52LA3|LIN52_HUMAN				1
RPKVPDQSV	35.14	1024.57	9	-1.2	513.29	31.79	7520000	1	18797	200716_dc_IP79_NormalLung-W6Ab_DDA-OTOT-HCD_25cmPepMap2uTT_145m_01.raw	1	1	Q8NCT1|ARRD4_HUMAN				1
SGEVSHPRKT	35.14	1096.56	10	-0.4	549.288	14.41	2410000	1	6396	200716_dc_IP79_NormalLung-W6Ab_DDA-OTOT-HCD_25cmPepMap2uTT_145m_01.raw	2	2	P02765|FETUA_HUMAN				0
RWVELEKPLK	35.14	1296.76	10	-0.1	433.259	47.41	4110000	1	29906	200716_dc_IP79_NormalLung-W6Ab_DDA-OTOT-HCD_25cmPepMap2uTT_145m_01.raw	1	1	Q15678|PTN14_HUMAN				0
MPKISMPGF	35.14	1006.5	9	-0.5	504.256	79.04	9890000	1	51959	200716_dc_IP79_NormalLung-W6Ab_DDA-OTOT-HCD_25cmPepMap2uTT_145m_01.raw	1	1	Q09666|AHNK_HUMAN				1
YM(+15.99)TAVVKLF	35.14	1086.58	9	-1.8	544.295	74.15	2740000	1	48735	200716_dc_IP79_NormalLung-W6Ab_DDA-OTOT-HCD_25cmPepMap2uTT_145m_01.raw	1	1	P13498|CY24A_HUMAN	Oxidation (M)	M2:Oxidation (M):1000.00		0
LPTTTGSAHAL	35.13	1067.56	11	-0.5	534.788	45.21	3180000	1	28335	200716_dc_IP79_NormalLung-W6Ab_DDA-OTOT-HCD_25cmPepMap2uTT_145m_01.raw	1	1	Q9NNW5|WDR6_HUMAN				0
EEKNFKAFA	35.13	1082.54	9	-0.5	542.277	40.78	5030000	1	25175	200716_dc_IP79_NormalLung-W6Ab_DDA-OTOT-HCD_25cmPepMap2uTT_145m_01.raw	1	1	P26373|RL13_HUMAN				1
APKKPPQRL	35.13	1033.64	9	-0.9	517.827	25.86	3820000	1	14529	200716_dc_IP79_NormalLung-W6Ab_DDA-OTOT-HCD_25cmPepMap2uTT_145m_01.raw	1	1	Q15109|RAGE_HUMAN				0
HVGQTFDR	35.12	958.462	8	-1	480.238	28.75	14100000	1	16649	200716_dc_IP79_NormalLung-W6Ab_DDA-OTOT-HCD_25cmPepMap2uTT_145m_01.raw	1	1	P16989|YBOX3_HUMAN				0
HWGGNVLGP	35.12	935.461	9	-0.9	936.468	58.7	48900000	1	37839	200716_dc_IP79_NormalLung-W6Ab_DDA-OTOT-HCD_25cmPepMap2uTT_145m_01.raw	2	2	P62424|RL7A_HUMAN				0
SGMKIGRIEDVTP	35.12	1401.73	13	0.1	701.872	56.72	3140000	1	36523	200716_dc_IP79_NormalLung-W6Ab_DDA-OTOT-HCD_25cmPepMap2uTT_145m_01.raw	1	1	P62263|RS14_HUMAN				0
GGSGGSGGYGGR	35.12	967.411	12	-1.7	484.712	25.58	0	1	14302	200716_dc_IP79_NormalLung-W6Ab_DDA-OTOT-HCD_25cmPepMap2uTT_145m_01.raw	0	0	P22626|ROA2_HUMAN				1
YKVPPFTFHVKK	35.11	1489.84	12	-0.3	497.622	49.78	2000000	1	31734	200716_dc_IP79_NormalLung-W6Ab_DDA-OTOT-HCD_25cmPepMap2uTT_145m_01.raw	1	1	Q6NZI2|CAVN1_HUMAN				0
ATIEDILFKAKRK	35.11	1531.91	13	-1.1	511.643	56.98	5200000	1	36718	200716_dc_IP79_NormalLung-W6Ab_DDA-OTOT-HCD_25cmPepMap2uTT_145m_01.raw	1	1	Q13888|TF2H2_HUMAN:Q6P1K8|T2H2L_HUMAN				1
VPKM(+15.99)KVPKF	35.11	1088.64	9	-0.7	363.887	33.22	204000000	1	20200	200716_dc_IP79_NormalLung-W6Ab_DDA-OTOT-HCD_25cmPepMap2uTT_145m_01.raw	2	2	Q09666|AHNK_HUMAN	Oxidation (M)	M4:Oxidation (M):1000.00		0
APDKRIYQF	35.1	1136.6	9	-1	569.306	48.06	7370000	1	30279	200716_dc_IP79_NormalLung-W6Ab_DDA-OTOT-HCD_25cmPepMap2uTT_145m_01.raw	1	1	O75563|SKAP2_HUMAN				1
SFYTRKESY	35.1	1179.56	9	-0.5	590.785	38.54	16300000	1	23571	200716_dc_IP79_NormalLung-W6Ab_DDA-OTOT-HCD_25cmPepMap2uTT_145m_01.raw	2	2	Q9NY47|CA2D2_HUMAN				1
GWRPPPPPL	35.09	1015.56	9	-0.7	508.787	65.97	9520000	1	43177	200716_dc_IP79_NormalLung-W6Ab_DDA-OTOT-HCD_25cmPepMap2uTT_145m_01.raw	1	1	O95302|FKBP9_HUMAN				0
ALAAGGYDVEKNN	35.08	1320.63	13	-1.3	661.322	46.14	815000	1	29062	200716_dc_IP79_NormalLung-W6Ab_DDA-OTOT-HCD_25cmPepMap2uTT_145m_01.raw	1	1	P16401|H15_HUMAN				0
NQPPQKEFSIPR	35.08	1439.75	12	-0.3	480.925	46.14	2360000	1	29037	200716_dc_IP79_NormalLung-W6Ab_DDA-OTOT-HCD_25cmPepMap2uTT_145m_01.raw	1	1	Q8NFJ5|RAI3_HUMAN				0
TYTEHAKRKT	35.08	1233.65	10	-0.7	412.223	14.6	810000	1	6524	200716_dc_IP79_NormalLung-W6Ab_DDA-OTOT-HCD_25cmPepMap2uTT_145m_01.raw	1	1	P62805|H4_HUMAN				0
HRHPDEAA	35.06	931.426	8	-1.6	466.719	15.13	12500000	1	6847	200716_dc_IP79_NormalLung-W6Ab_DDA-OTOT-HCD_25cmPepMap2uTT_145m_01.raw	2	2	P02671|FIBA_HUMAN				0
RDGQVINETSQ	35.04	1245.6	11	-1.1	623.804	34.1	3920000	1	20450	200716_dc_IP79_NormalLung-W6Ab_DDA-OTOT-HCD_25cmPepMap2uTT_145m_01.raw	1	1	P08670|VIME_HUMAN				0
KPSDVM(+15.99)LVHF	35.04	1187.6	10	-1	396.874	57.75	3240000	1	37253	200716_dc_IP79_NormalLung-W6Ab_DDA-OTOT-HCD_25cmPepMap2uTT_145m_01.raw	1	1	Q8WWM7|ATX2L_HUMAN	Oxidation (M)	M6:Oxidation (M):1000.00		0
KSKSMDAIRSL	35.04	1234.67	11	-2.1	412.563	37.6	909000	1	22951	200716_dc_IP79_NormalLung-W6Ab_DDA-OTOT-HCD_25cmPepMap2uTT_145m_01.raw	1	1	Q9BQ39|DDX50_HUMAN				0
KVKEFC(+119.00)ENL	35.04	1227.56	9	-0.1	614.789	40.19	21500000	1	24710	200716_dc_IP79_NormalLung-W6Ab_DDA-OTOT-HCD_25cmPepMap2uTT_145m_01.raw	2	2	P30153|2AAA_HUMAN	Cysteinylation	C6:Cysteinylation:1000.00		0
SKGVPVISVK	35.03	1012.63	10	-1.4	507.321	40.14	1660000	1	24746	200716_dc_IP79_NormalLung-W6Ab_DDA-OTOT-HCD_25cmPepMap2uTT_145m_01.raw	1	1	Q15424|SAFB1_HUMAN				0
FGDNLVTR	35.02	920.472	8	-0.6	461.243	49.29	12500000	1	31213	200716_dc_IP79_NormalLung-W6Ab_DDA-OTOT-HCD_25cmPepMap2uTT_145m_01.raw	1	1	P02545|LMNA_HUMAN				0
KTKFTIENV	35.02	1078.6	9	-1	540.308	44.86	61300000	1	28040	200716_dc_IP79_NormalLung-W6Ab_DDA-OTOT-HCD_25cmPepMap2uTT_145m_01.raw	1	1	Q9NRX1|PNO1_HUMAN				1
APAPAAHVA	35.01	803.429	9	-1.1	402.721	30.18	2070000	1	17657	200716_dc_IP79_NormalLung-W6Ab_DDA-OTOT-HCD_25cmPepMap2uTT_145m_01.raw	1	1	P16989|YBOX3_HUMAN				1
GEHDKMVAA	35.01	956.438	9	-1.2	479.226	27.53	8630000	1	15737	200716_dc_IP79_NormalLung-W6Ab_DDA-OTOT-HCD_25cmPepMap2uTT_145m_01.raw	1	1	Q8TBC3|SHKB1_HUMAN				1
KETVFTKSP	35.01	1035.56	9	-2.6	518.786	31.86	0	1	18835	200716_dc_IP79_NormalLung-W6Ab_DDA-OTOT-HCD_25cmPepMap2uTT_145m_01.raw	0	0	P15880|RS2_HUMAN				1
SAIHTIAHL	35	961.534	9	-0.8	481.774	44.66	7970000	1	27992	200716_dc_IP79_NormalLung-W6Ab_DDA-OTOT-HCD_25cmPepMap2uTT_145m_01.raw	1	1	P04839|CY24B_HUMAN				1
KATEYIQYM(+15.99)	35	1161.54	9	-1.5	581.775	48.55	5060000	1	30661	200716_dc_IP79_NormalLung-W6Ab_DDA-OTOT-HCD_25cmPepMap2uTT_145m_01.raw	1	1	P61244|MAX_HUMAN	Oxidation (M)	M9:Oxidation (M):1000.00		0
AELENLVNQAA	35	1170.59	11	-0.3	586.301	75.14	5760000	1	49327	200716_dc_IP79_NormalLung-W6Ab_DDA-OTOT-HCD_25cmPepMap2uTT_145m_01.raw	1	1	Q96TA2|YMEL1_HUMAN				1
AEFPM(+15.99)SPVTSA	34.99	1151.52	11	-1.1	576.765	66.47	2580000	1	43428	200716_dc_IP79_NormalLung-W6Ab_DDA-OTOT-HCD_25cmPepMap2uTT_145m_01.raw	1	1	Q8N423|LIRB2_HUMAN:O75022|LIRB3_HUMAN:Q6PI73|LIRA6_HUMAN:P59901|LIRA4_HUMAN:O75019|LIRA1_HUMAN:Q8N6C8|LIRA3_HUMAN	Oxidation (M)	M5:Oxidation (M):1000.00		0
HAAPRPLLL	34.99	986.602	9	-0.2	494.308	47.86	3160000	1	30248	200716_dc_IP79_NormalLung-W6Ab_DDA-OTOT-HCD_25cmPepMap2uTT_145m_01.raw	1	1	Q8NFR9|I17RE_HUMAN				0
TLVSEQTR	34.99	932.493	8	-0.3	933.5	33.37	26900000	1	19953	200716_dc_IP79_NormalLung-W6Ab_DDA-OTOT-HCD_25cmPepMap2uTT_145m_01.raw	2	2	P46776|RL27A_HUMAN				0
VPAPPTVLRVL	34.98	1160.73	11	-1.1	581.371	78.35	9020000	1	51565	200716_dc_IP79_NormalLung-W6Ab_DDA-OTOT-HCD_25cmPepMap2uTT_145m_01.raw	1	1	Q9H1Z4|WDR13_HUMAN				0
HTNNLRPKK	34.98	1106.63	9	-0.9	369.884	14.21	6190000	1	6276	200716_dc_IP79_NormalLung-W6Ab_DDA-OTOT-HCD_25cmPepMap2uTT_145m_01.raw	2	2	P62987|RL40_HUMAN				1
RIHPEGPPLK	34.97	1142.66	10	0.3	381.893	31.06	4170000	1	18363	200716_dc_IP79_NormalLung-W6Ab_DDA-OTOT-HCD_25cmPepMap2uTT_145m_01.raw	1	1	Q9Y4R8|TELO2_HUMAN				1
VVKPKKAAPK	34.97	1064.71	10	0.6	355.91	15.42	121000000	1	7198	200716_dc_IP79_NormalLung-W6Ab_DDA-OTOT-HCD_25cmPepMap2uTT_145m_01.raw	2	2	P16403|H12_HUMAN				1
ASRQAPPHI	34.96	975.525	9	-0.8	488.769	29.93	31700000	1	17428	200716_dc_IP79_NormalLung-W6Ab_DDA-OTOT-HCD_25cmPepMap2uTT_145m_01.raw	1	1	Q9Y2D5|AKAP2_HUMAN				1
QEAQKIFKA	34.96	1061.59	9	-1.6	531.8	35.14	19200000	1	21163	200716_dc_IP79_NormalLung-W6Ab_DDA-OTOT-HCD_25cmPepMap2uTT_145m_01.raw	2	2	O95782|AP2A1_HUMAN				1
QFKGYFIFK	34.94	1176.63	9	-0.9	589.323	67.85	25200000	1	44298	200716_dc_IP79_NormalLung-W6Ab_DDA-OTOT-HCD_25cmPepMap2uTT_145m_01.raw	2	2	Q9NY27|PP4R2_HUMAN				0
RSAPGGGSKVPQK	34.94	1267.7	13	-1	423.573	25.25	0	1	14050	200716_dc_IP79_NormalLung-W6Ab_DDA-OTOT-HCD_25cmPepMap2uTT_145m_01.raw	0	0	P06748|NPM_HUMAN				1
SPAKAKAPKPK	34.94	1121.69	11	-1	374.904	14.98	4820000	1	6662	200716_dc_IP79_NormalLung-W6Ab_DDA-OTOT-HCD_25cmPepMap2uTT_145m_01.raw	2	2	P16402|H13_HUMAN				0
HPKKQRHLL	34.94	1155.7	9	-1.2	386.24	24.58	5510000	1	13562	200716_dc_IP79_NormalLung-W6Ab_DDA-OTOT-HCD_25cmPepMap2uTT_145m_01.raw	1	1	Q6W2J9|BCOR_HUMAN				0
TPSVAGSEKRL	34.94	1143.62	11	-1.5	382.215	34.7	4530000	1	20850	200716_dc_IP79_NormalLung-W6Ab_DDA-OTOT-HCD_25cmPepMap2uTT_145m_01.raw	2	2	Q9P266|JCAD_HUMAN				0
AAASHPLLL	34.94	891.518	9	-0.5	446.766	55.05	1760000	1	35371	200716_dc_IP79_NormalLung-W6Ab_DDA-OTOT-HCD_25cmPepMap2uTT_145m_01.raw	1	1	P20591|MX1_HUMAN				1
AASKERSGVSL	34.94	1103.59	11	-1.1	552.803	29.67	0	1	17271	200716_dc_IP79_NormalLung-W6Ab_DDA-OTOT-HCD_25cmPepMap2uTT_145m_01.raw	0	0	P16403|H12_HUMAN:P10412|H14_HUMAN:P16402|H13_HUMAN				1
KYKAFTYTV	34.94	1119.6	9	-1.2	560.805	49.87	8790000	1	31641	200716_dc_IP79_NormalLung-W6Ab_DDA-OTOT-HCD_25cmPepMap2uTT_145m_01.raw	1	1	Q9UEY8|ADDG_HUMAN				0
AESWGTGRAVA	34.93	1103.54	11	-1.5	552.774	45.11	14600000	1	28248	200716_dc_IP79_NormalLung-W6Ab_DDA-OTOT-HCD_25cmPepMap2uTT_145m_01.raw	1	1	P36578|RL4_HUMAN				1
TDHPKYSDM	34.93	1092.45	9	-1.8	547.234	32.08	3960000	1	18985	200716_dc_IP79_NormalLung-W6Ab_DDA-OTOT-HCD_25cmPepMap2uTT_145m_01.raw	1	1	P07305|H10_HUMAN				0
APKPQGPAF	34.93	911.486	9	-1.1	456.75	42.16	4660000	1	26122	200716_dc_IP79_NormalLung-W6Ab_DDA-OTOT-HCD_25cmPepMap2uTT_145m_01.raw	1	1	Q99704|DOK1_HUMAN				1
KPRDVSSVEL	34.93	1128.61	10	-2.2	565.313	40.93	357000000	1	25208	200716_dc_IP79_NormalLung-W6Ab_DDA-OTOT-HCD_25cmPepMap2uTT_145m_01.raw	3	3	Q01082|SPTB2_HUMAN				1
IEKPAGPPGILAL	34.93	1274.76	13	-1.1	638.386	77.36	4040000	1	50882	200716_dc_IP79_NormalLung-W6Ab_DDA-OTOT-HCD_25cmPepMap2uTT_145m_01.raw	1	1	P35579|MYH9_HUMAN				1
SNYGPPQGK	34.92	946.451	9	-1.3	474.232	30.81	11100000	1	17996	200716_dc_IP79_NormalLung-W6Ab_DDA-OTOT-HCD_25cmPepMap2uTT_145m_01.raw	1	1	Q12906|ILF3_HUMAN				0
TERFGQGGAGP	34.92	1075.5	11	-1.7	538.759	37.94	3330000	1	23145	200716_dc_IP79_NormalLung-W6Ab_DDA-OTOT-HCD_25cmPepMap2uTT_145m_01.raw	1	1	P23246|SFPQ_HUMAN				0
EESRLLQTAA	34.92	1116.58	10	-1.3	559.295	47.27	17100000	1	29755	200716_dc_IP79_NormalLung-W6Ab_DDA-OTOT-HCD_25cmPepMap2uTT_145m_01.raw	1	1	P40763|STAT3_HUMAN				1
KVKSYIHEV	34.92	1101.62	9	-1.7	551.815	31.4	33000000	1	18511	200716_dc_IP79_NormalLung-W6Ab_DDA-OTOT-HCD_25cmPepMap2uTT_145m_01.raw	2	2	O94832|MYO1D_HUMAN				1
APRTIFQRVL	34.91	1199.71	10	-0.5	400.912	59.2	989000	1	38295	200716_dc_IP79_NormalLung-W6Ab_DDA-OTOT-HCD_25cmPepMap2uTT_145m_01.raw	1	1	Q9UBB4|ATX10_HUMAN				1
TPKKLGNSL	34.91	956.565	9	-1.4	479.289	29.54	55100000	1	17147	200716_dc_IP79_NormalLung-W6Ab_DDA-OTOT-HCD_25cmPepMap2uTT_145m_01.raw	1	1	Q14980|NUMA1_HUMAN				1
RPATVEDLKKL	34.91	1268.75	11	-0.6	423.922	43.65	0	1	27224	200716_dc_IP79_NormalLung-W6Ab_DDA-OTOT-HCD_25cmPepMap2uTT_145m_01.raw	0	0	Q6ZWL3|CP4V2_HUMAN				0
AYIAHPKLGK	34.91	1096.64	10	-1.1	366.553	32.66	16100000	1	19147	200716_dc_IP79_NormalLung-W6Ab_DDA-OTOT-HCD_25cmPepMap2uTT_145m_01.raw	1	1	P47914|RL29_HUMAN				0
AEAKFFTES	34.91	1028.48	9	-1.3	515.247	51.45	31800000	1	32730	200716_dc_IP79_NormalLung-W6Ab_DDA-OTOT-HCD_25cmPepMap2uTT_145m_01.raw	2	2	Q7KZF4|SND1_HUMAN				1
SLGSPSGEVSHPR	34.89	1308.64	13	-2	437.221	33.37	579000	1	19945	200716_dc_IP79_NormalLung-W6Ab_DDA-OTOT-HCD_25cmPepMap2uTT_145m_01.raw	1	1	P02765|FETUA_HUMAN				0
KVKFEERYK	34.88	1225.68	9	-1.1	409.567	27.57	2250000	1	15810	200716_dc_IP79_NormalLung-W6Ab_DDA-OTOT-HCD_25cmPepMap2uTT_145m_01.raw	1	1	P61353|RL27_HUMAN				1
TPQNKNAVSV	34.88	1056.56	10	-1.5	529.285	31.84	2650000	1	18827	200716_dc_IP79_NormalLung-W6Ab_DDA-OTOT-HCD_25cmPepMap2uTT_145m_01.raw	1	1	Q5QJE6|TDIF2_HUMAN				0
SETIFKLAA	34.87	978.539	9	-0.7	490.276	67.65	4640000	1	44223	200716_dc_IP79_NormalLung-W6Ab_DDA-OTOT-HCD_25cmPepMap2uTT_145m_01.raw	1	1	Q9Y2L6|FRM4B_HUMAN				0
AVASFPKKQE	34.85	1103.6	10	-0.4	552.806	31.16	10700000	1	18355	200716_dc_IP79_NormalLung-W6Ab_DDA-OTOT-HCD_25cmPepMap2uTT_145m_01.raw	2	2	P14406|CX7A2_HUMAN				1
MEDAKVYVA	34.85	1024.49	9	-1.1	513.252	46.97	17100000	1	29544	200716_dc_IP79_NormalLung-W6Ab_DDA-OTOT-HCD_25cmPepMap2uTT_145m_01.raw	1	1	Q8NBS9|TXND5_HUMAN				1
RVKEYFVFR	34.85	1242.69	9	-0.5	415.236	48.89	8460000	1	30904	200716_dc_IP79_NormalLung-W6Ab_DDA-OTOT-HCD_25cmPepMap2uTT_145m_01.raw	1	1	Q5T0D9|TPRGL_HUMAN				1
HAGEYGAEALE	34.84	1145.5	11	-0.4	573.756	47.32	4040000	1	29841	200716_dc_IP79_NormalLung-W6Ab_DDA-OTOT-HCD_25cmPepMap2uTT_145m_01.raw	1	1	P69905|HBA_HUMAN				0
TPNSIPKGF	34.83	959.508	9	-0.2	480.761	52.29	1790000	1	33410	200716_dc_IP79_NormalLung-W6Ab_DDA-OTOT-HCD_25cmPepMap2uTT_145m_01.raw	1	1	P35579|MYH9_HUMAN				0
YPYRYPAL	34.83	1041.53	8	-0.8	521.771	63.85	9860000	1	41470	200716_dc_IP79_NormalLung-W6Ab_DDA-OTOT-HCD_25cmPepMap2uTT_145m_01.raw	1	1	P35611|ADDA_HUMAN				1
AAADPKVAF	34.83	888.471	9	-1.2	445.242	49.19	84500000	1	31105	200716_dc_IP79_NormalLung-W6Ab_DDA-OTOT-HCD_25cmPepMap2uTT_145m_01.raw	2	2	Q9UKX7|NUP50_HUMAN				1
RLKPFYLVPK	34.83	1259.78	10	-1	420.932	51.05	3550000	1	32484	200716_dc_IP79_NormalLung-W6Ab_DDA-OTOT-HCD_25cmPepMap2uTT_145m_01.raw	1	1	Q8N884|CGAS_HUMAN				1
VQRTQAPAV	34.82	968.54	9	-0.8	485.277	33.23	0	1	19816	200716_dc_IP79_NormalLung-W6Ab_DDA-OTOT-HCD_25cmPepMap2uTT_145m_01.raw	0	0	P15880|RS2_HUMAN				1
RYFGGRVVK	34.82	1080.62	9	-1.2	361.213	30.72	30200000	1	17983	200716_dc_IP79_NormalLung-W6Ab_DDA-OTOT-HCD_25cmPepMap2uTT_145m_01.raw	1	1	Q96I25|SPF45_HUMAN				1
LPKQPVIVKA	34.82	1091.71	10	-0.9	364.909	43.14	4560000	1	26837	200716_dc_IP79_NormalLung-W6Ab_DDA-OTOT-HCD_25cmPepMap2uTT_145m_01.raw	1	1	P46776|RL27A_HUMAN				1
YFQNHDAADK	34.82	1207.53	10	-0.9	403.515	28.8	2600000	1	16662	200716_dc_IP79_NormalLung-W6Ab_DDA-OTOT-HCD_25cmPepMap2uTT_145m_01.raw	1	1	Q13151|ROA0_HUMAN				0
KPM(+15.99)MKEFRF	34.81	1228.61	9	-1.3	410.543	43.63	13800000	1	27195	200716_dc_IP79_NormalLung-W6Ab_DDA-OTOT-HCD_25cmPepMap2uTT_145m_01.raw	1	1	P69849|NOMO3_HUMAN:Q15155|NOMO1_HUMAN:Q5JPE7|NOMO2_HUMAN	Oxidation (M)	M3:Oxidation (M):23.10		0
RPRHQGVMV	34.81	1078.58	9	-0.6	360.534	26.73	127000000	1	15133	200716_dc_IP79_NormalLung-W6Ab_DDA-OTOT-HCD_25cmPepMap2uTT_145m_01.raw	2	2	P60709|ACTB_HUMAN:P63261|ACTG_HUMAN:P68032|ACTC_HUMAN:P62736|ACTA_HUMAN:P68133|ACTS_HUMAN:P63267|ACTH_HUMAN:Q562R1|ACTBL_HUMAN				1
VPNGFHVNL	34.8	995.519	9	-1	498.766	65.53	3060000	1	42839	200716_dc_IP79_NormalLung-W6Ab_DDA-OTOT-HCD_25cmPepMap2uTT_145m_01.raw	1	1	P17948|VGFR1_HUMAN				0
SVVTVAVKGNK	34.8	1100.66	11	-0.6	551.335	33.32	958000	1	19896	200716_dc_IP79_NormalLung-W6Ab_DDA-OTOT-HCD_25cmPepMap2uTT_145m_01.raw	1	1	Q14966|ZN638_HUMAN				0
KPQDYKKRL	34.8	1174.68	9	0.7	392.568	26.05	93500000	1	14596	200716_dc_IP79_NormalLung-W6Ab_DDA-OTOT-HCD_25cmPepMap2uTT_145m_01.raw	1	1	P35222|CTNB1_HUMAN				1
RSKIKSFVK	34.79	1091.68	9	-1.7	364.901	26.1	24700000	1	14689	200716_dc_IP79_NormalLung-W6Ab_DDA-OTOT-HCD_25cmPepMap2uTT_145m_01.raw	1	1	P61353|RL27_HUMAN				1
KYIDVVINK	34.79	1090.64	9	-1.4	546.326	48.75	3520000	1	30842	200716_dc_IP79_NormalLung-W6Ab_DDA-OTOT-HCD_25cmPepMap2uTT_145m_01.raw	1	1	O75525|KHDR3_HUMAN				1
VPYEKGFAL	34.79	1022.54	9	-0.9	512.279	65.53	18300000	1	42697	200716_dc_IP79_NormalLung-W6Ab_DDA-OTOT-HCD_25cmPepMap2uTT_145m_01.raw	1	1	P09960|LKHA4_HUMAN				1
FGLARIYSY	34.77	1088.57	9	-0.6	545.29	74.1	13500000	1	48597	200716_dc_IP79_NormalLung-W6Ab_DDA-OTOT-HCD_25cmPepMap2uTT_145m_01.raw	1	1	P11802|CDK4_HUMAN				1
HAWPSPYKDYEVK	34.77	1618.78	13	-1.8	540.599	50.62	4920000	1	32187	200716_dc_IP79_NormalLung-W6Ab_DDA-OTOT-HCD_25cmPepMap2uTT_145m_01.raw	1	1	Q8NFJ5|RAI3_HUMAN				0
RPNQSLRSITL	34.75	1283.73	11	-0.3	428.917	48.89	1810000	1	30954	200716_dc_IP79_NormalLung-W6Ab_DDA-OTOT-HCD_25cmPepMap2uTT_145m_01.raw	1	1	Q9BYK8|HELZ2_HUMAN				1
FQEFKADIK	34.74	1124.59	9	-0.1	563.301	47.12	7890000	1	29697	200716_dc_IP79_NormalLung-W6Ab_DDA-OTOT-HCD_25cmPepMap2uTT_145m_01.raw	2	2	Q9BZV1|UBXN6_HUMAN				0
FGIGQDIQPK	34.73	1101.58	10	0	551.798	56.58	18300000	1	36334	200716_dc_IP79_NormalLung-W6Ab_DDA-OTOT-HCD_25cmPepMap2uTT_145m_01.raw	1	1	P62424|RL7A_HUMAN				0
KWKDIELEKM	34.73	1318.7	10	-1.3	440.572	52	2760000	1	33172	200716_dc_IP79_NormalLung-W6Ab_DDA-OTOT-HCD_25cmPepMap2uTT_145m_01.raw	1	1	Q8N6T3|ARFG1_HUMAN				0
FATEVFKAM	34.72	1042.52	9	-1	522.265	70.12	956000	1	46031	200716_dc_IP79_NormalLung-W6Ab_DDA-OTOT-HCD_25cmPepMap2uTT_145m_01.raw	1	1	Q12882|DPYD_HUMAN				1
VPLEKAKQVL	34.72	1123.7	10	-1.1	562.855	45.21	10300000	1	28320	200716_dc_IP79_NormalLung-W6Ab_DDA-OTOT-HCD_25cmPepMap2uTT_145m_01.raw	1	1	Q9Y5A9|YTHD2_HUMAN:Q7Z739|YTHD3_HUMAN:Q9BYJ9|YTHD1_HUMAN				0
SFKLSGFSFK	34.71	1146.61	10	-1.6	383.209	68.64	5050000	1	44938	200716_dc_IP79_NormalLung-W6Ab_DDA-OTOT-HCD_25cmPepMap2uTT_145m_01.raw	2	2	P29966|MARCS_HUMAN				0
NSALRQM(+15.99)SY	34.71	1084.5	9	-1.8	543.255	35.29	5490000	1	21285	200716_dc_IP79_NormalLung-W6Ab_DDA-OTOT-HCD_25cmPepMap2uTT_145m_01.raw	1	1	Q9Y580|RBM7_HUMAN	Oxidation (M)	M7:Oxidation (M):1000.00		0
TVKAKPVKA	34.71	940.607	9	-0.5	471.31	17.12	553000	1	8307	200716_dc_IP79_NormalLung-W6Ab_DDA-OTOT-HCD_25cmPepMap2uTT_145m_01.raw	1	1	P07305|H10_HUMAN				0
KPKKPVGAA	34.7	894.565	9	-0.8	448.289	14.89	10600000	1	6717	200716_dc_IP79_NormalLung-W6Ab_DDA-OTOT-HCD_25cmPepMap2uTT_145m_01.raw	2	2	P16403|H12_HUMAN				1
SRAGLQFPVGR	34.69	1186.66	11	-1.4	594.335	49.33	15000000	1	31189	200716_dc_IP79_NormalLung-W6Ab_DDA-OTOT-HCD_25cmPepMap2uTT_145m_01.raw	2	2	P20671|H2A1D_HUMAN:P04908|H2A1B_HUMAN:Q93077|H2A1C_HUMAN:Q7L7L0|H2A3_HUMAN:P0C0S8|H2A1_HUMAN:Q6FI13|H2A2A_HUMAN:P16104|H2AX_HUMAN:Q96KK5|H2A1H_HUMAN:Q99878|H2A1J_HUMAN:Q8IUE6|H2A2B_HUMAN:Q9BTM1|H2AJ_HUMAN:Q16777|H2A2C_HUMAN:Q96QV6|H2A1A_HUMAN				1
VTTSTRTY	34.69	927.466	8	-1.2	928.472	30.42	50200000	1	17807	200716_dc_IP79_NormalLung-W6Ab_DDA-OTOT-HCD_25cmPepMap2uTT_145m_01.raw	2	2	P08670|VIME_HUMAN				1
MEEKHMPPP	34.69	1094.49	9	0.9	548.252	30.91	14900000	1	18214	200716_dc_IP79_NormalLung-W6Ab_DDA-OTOT-HCD_25cmPepMap2uTT_145m_01.raw	1	1	P11308|ERG_HUMAN				0
QEDRPGLHA	34.69	1021.49	9	-1.6	511.753	30.32	13300000	1	17738	200716_dc_IP79_NormalLung-W6Ab_DDA-OTOT-HCD_25cmPepMap2uTT_145m_01.raw	1	1	P33241|LSP1_HUMAN				1
ATLEEKRKEK	34.69	1230.69	10	-2	616.353	15.03	14600000	1	6798	200716_dc_IP79_NormalLung-W6Ab_DDA-OTOT-HCD_25cmPepMap2uTT_145m_01.raw	2	2	P40429|RL13A_HUMAN:Q6NVV1|R13P3_HUMAN				0
TPLNSQKQL	34.69	1027.57	9	-1.1	514.79	38.18	23400000	1	23281	200716_dc_IP79_NormalLung-W6Ab_DDA-OTOT-HCD_25cmPepMap2uTT_145m_01.raw	1	1	P31645|SC6A4_HUMAN				0
VM(+15.99)APRTLIL	34.69	1028.61	9	-1	515.309	66.37	62500000	1	43526	200716_dc_IP79_NormalLung-W6Ab_DDA-OTOT-HCD_25cmPepMap2uTT_145m_01.raw	1	1	Q29960|1C16_HUMAN:P04222|1C03_HUMAN:P30504|1C04_HUMAN:P30505|1C08_HUMAN:Q29963|1C06_HUMAN:P30510|1C14_HUMAN:Q9TNN7|1C05_HUMAN:P30508|1C12_HUMAN	Oxidation (M)	M2:Oxidation (M):1000.00		0
VM(+15.99)APRTLLL	34.69	1028.61	9	-1	515.309	66.37	62500000	1	43526	200716_dc_IP79_NormalLung-W6Ab_DDA-OTOT-HCD_25cmPepMap2uTT_145m_01.raw	1	1	Q07000|1C15_HUMAN:P30455|1A36_HUMAN:P04439|1A03_HUMAN:P13746|1A11_HUMAN:P30443|1A01_HUMAN:P16188|1A30_HUMAN:P16190|1A33_HUMAN:P30459|1A74_HUMAN:P10314|1A32_HUMAN:P30512|1A29_HUMAN:P16189|1A31_HUMAN	Oxidation (M)	M2:Oxidation (M):1000.00		0
FFAERLYY	34.68	1107.54	8	-0.6	554.776	75.29	25700000	1	49365	200716_dc_IP79_NormalLung-W6Ab_DDA-OTOT-HCD_25cmPepMap2uTT_145m_01.raw	1	1	P20073|ANXA7_HUMAN				1
MPKMKMPTF	34.68	1109.54	9	-2.3	555.778	63.14	7240000	1	40887	200716_dc_IP79_NormalLung-W6Ab_DDA-OTOT-HCD_25cmPepMap2uTT_145m_01.raw	2	2	Q09666|AHNK_HUMAN				0
ASVEHGRVY	34.68	1016.5	9	-1.3	509.259	29.64	18200000	1	17238	200716_dc_IP79_NormalLung-W6Ab_DDA-OTOT-HCD_25cmPepMap2uTT_145m_01.raw	1	1	Q9H2F3|3BHS7_HUMAN				1
HN(+.98)HHAHNY	34.68	1029.42	8	-0.4	515.715	12.82	448000	1	5306	200716_dc_IP79_NormalLung-W6Ab_DDA-OTOT-HCD_25cmPepMap2uTT_145m_01.raw	1	1	P51911|CNN1_HUMAN	Deamidation (NQ)	N2:Deamidation (NQ):91.35		0
KATEYVHSL	34.68	1046.54	9	-1	524.277	38.28	2890000	1	23427	200716_dc_IP79_NormalLung-W6Ab_DDA-OTOT-HCD_25cmPepMap2uTT_145m_01.raw	1	1	P04198|MYCN_HUMAN				1
HPSKVVITRL	34.67	1148.7	10	-0.5	383.908	35.83	15100000	1	21606	200716_dc_IP79_NormalLung-W6Ab_DDA-OTOT-HCD_25cmPepMap2uTT_145m_01.raw	1	1	P61254|RL26_HUMAN:Q9UNX3|RL26L_HUMAN				1
SAQKAQKAK	34.66	958.556	9	-0.4	480.285	8.37	316000	1	2342	200716_dc_IP79_NormalLung-W6Ab_DDA-OTOT-HCD_25cmPepMap2uTT_145m_01.raw	1	1	P68104|EF1A1_HUMAN:Q5VTE0|EF1A3_HUMAN				0
FGGASHAK	34.66	773.382	8	0	387.698	17.12	5190000	1	8245	200716_dc_IP79_NormalLung-W6Ab_DDA-OTOT-HCD_25cmPepMap2uTT_145m_01.raw	2	2	P62266|RS23_HUMAN				0
HGYGGKFG	34.66	821.382	8	-0.8	411.698	29.24	1240000	1	16978	200716_dc_IP79_NormalLung-W6Ab_DDA-OTOT-HCD_25cmPepMap2uTT_145m_01.raw	1	1	Q14247|SRC8_HUMAN				0
GNDFHTNK	34.65	931.415	8	-1.1	466.714	24.43	9990000	1	13305	200716_dc_IP79_NormalLung-W6Ab_DDA-OTOT-HCD_25cmPepMap2uTT_145m_01.raw	1	1	P08708|RS17_HUMAN				1
HPAVVIRQ	34.65	918.54	8	-0.7	460.277	31.06	49700000	1	18208	200716_dc_IP79_NormalLung-W6Ab_DDA-OTOT-HCD_25cmPepMap2uTT_145m_01.raw	1	1	P62829|RL23_HUMAN				1
THTRVSVQRTQAP	34.65	1479.79	13	-1.3	494.27	28.26	7830000	1	16272	200716_dc_IP79_NormalLung-W6Ab_DDA-OTOT-HCD_25cmPepMap2uTT_145m_01.raw	1	1	P15880|RS2_HUMAN				0
QPFLPPPGQEL	34.64	1221.64	11	-1.8	611.826	84.08	12800000	1	55721	200716_dc_IP79_NormalLung-W6Ab_DDA-OTOT-HCD_25cmPepMap2uTT_145m_01.raw	1	1	Q9NZV5|SELN_HUMAN				0
WIKEKIYVL	34.63	1190.71	9	-0.8	596.36	66.12	6920000	1	43102	200716_dc_IP79_NormalLung-W6Ab_DDA-OTOT-HCD_25cmPepMap2uTT_145m_01.raw	1	1	P84090|ERH_HUMAN				1
YGLGSLALYEK	34.63	1212.64	11	-0.9	607.326	75.08	2330000	1	49298	200716_dc_IP79_NormalLung-W6Ab_DDA-OTOT-HCD_25cmPepMap2uTT_145m_01.raw	1	1	P36542|ATPG_HUMAN				0
KSTDVAKTF	34.62	995.529	9	-1.3	498.771	32.38	155000000	1	19139	200716_dc_IP79_NormalLung-W6Ab_DDA-OTOT-HCD_25cmPepMap2uTT_145m_01.raw	1	1	P13796|PLSL_HUMAN				1
TPYEYPYTL	34.62	1145.53	9	-1.5	573.77	83.74	16200000	1	55374	200716_dc_IP79_NormalLung-W6Ab_DDA-OTOT-HCD_25cmPepMap2uTT_145m_01.raw	2	2	Q96PU8|QKI_HUMAN				1
TDFDRFKVM(+15.99)KA	34.62	1372.68	11	-1.4	687.347	44.52	26500000	1	27832	200716_dc_IP79_NormalLung-W6Ab_DDA-OTOT-HCD_25cmPepMap2uTT_145m_01.raw	2	2	P50914|RL14_HUMAN	Oxidation (M)	M9:Oxidation (M):1000.00		0
TETQEKNTLPTKE	34.62	1517.76	13	-0.9	506.926	30.86	2040000	1	18148	200716_dc_IP79_NormalLung-W6Ab_DDA-OTOT-HCD_25cmPepMap2uTT_145m_01.raw	1	1	P63313|TYB10_HUMAN				0
HHTIGGSRR	34.62	1019.54	9	-1.3	510.775	13.83	5080000	1	5974	200716_dc_IP79_NormalLung-W6Ab_DDA-OTOT-HCD_25cmPepMap2uTT_145m_01.raw	1	1	P61313|RL15_HUMAN				1
SPKFNHNLL	34.61	1068.57	9	-0.7	535.293	45.74	53200000	1	28663	200716_dc_IP79_NormalLung-W6Ab_DDA-OTOT-HCD_25cmPepMap2uTT_145m_01.raw	2	2	Q07157|ZO1_HUMAN				0
SFRYNGLIHRK	34.61	1389.76	11	-1.5	464.261	36.62	2740000	1	22224	200716_dc_IP79_NormalLung-W6Ab_DDA-OTOT-HCD_25cmPepMap2uTT_145m_01.raw	1	1	P46779|RL28_HUMAN				0
STSAPAAKPKRAK	34.61	1311.76	13	-0.8	438.261	15.85	587000	1	7394	200716_dc_IP79_NormalLung-W6Ab_DDA-OTOT-HCD_25cmPepMap2uTT_145m_01.raw	1	1	P07305|H10_HUMAN				0
APQTHLGL	34.6	835.455	8	-1.1	418.734	46.78	15400000	1	29463	200716_dc_IP79_NormalLung-W6Ab_DDA-OTOT-HCD_25cmPepMap2uTT_145m_01.raw	1	1	Q96C19|EFHD2_HUMAN:Q9BUP0|EFHD1_HUMAN				1
TISTSDPAEVLVK	34.6	1358.73	13	-1.1	680.371	63.54	8420000	1	41263	200716_dc_IP79_NormalLung-W6Ab_DDA-OTOT-HCD_25cmPepMap2uTT_145m_01.raw	1	1	Q86UE4|LYRIC_HUMAN				0
IPQVTSDGKRL	34.6	1212.68	11	-0.9	405.235	41.57	1990000	1	25760	200716_dc_IP79_NormalLung-W6Ab_DDA-OTOT-HCD_25cmPepMap2uTT_145m_01.raw	1	1	Q92499|DDX1_HUMAN				0
KTIDM(+15.99)ELVKRK	34.6	1375.79	11	-1	459.602	28.64	0	1	16533	200716_dc_IP79_NormalLung-W6Ab_DDA-OTOT-HCD_25cmPepMap2uTT_145m_01.raw	0	0	P01137|TGFB1_HUMAN	Oxidation (M)	M5:Oxidation (M):1000.00		0
SANTRFAL	34.59	878.461	8	-0.9	440.237	49.93	44900000	1	31634	200716_dc_IP79_NormalLung-W6Ab_DDA-OTOT-HCD_25cmPepMap2uTT_145m_01.raw	2	2	P30740|ILEU_HUMAN				1
SPKIASHQF	34.58	1013.53	9	-0.7	507.772	34.83	0	1	20958	200716_dc_IP79_NormalLung-W6Ab_DDA-OTOT-HCD_25cmPepMap2uTT_145m_01.raw	0	0	Q9Y6Q9|NCOA3_HUMAN				1
VYKVPPFTF	34.58	1096.6	9	-4.8	549.303	83.1	24300000	1	53884	200716_dc_IP79_NormalLung-W6Ab_DDA-OTOT-HCD_25cmPepMap2uTT_145m_01.raw	1	1	Q6NZI2|CAVN1_HUMAN				1
VPGPQHTEL	34.58	976.498	9	-1.2	489.256	42.6	10800000	1	26407	200716_dc_IP79_NormalLung-W6Ab_DDA-OTOT-HCD_25cmPepMap2uTT_145m_01.raw	1	1	Q92502|STAR8_HUMAN				0
C(+119.00)INPKKQRK	34.56	1232.65	9	-0.9	411.89	12.16	409000	1	4827	200716_dc_IP79_NormalLung-W6Ab_DDA-OTOT-HCD_25cmPepMap2uTT_145m_01.raw	1	1	Q96FN4|CPNE2_HUMAN	Cysteinylation	C1:Cysteinylation:1000.00		0
VTYTEHAKRK	34.56	1231.67	10	-0.5	411.563	18.11	341000	1	9002	200716_dc_IP79_NormalLung-W6Ab_DDA-OTOT-HCD_25cmPepMap2uTT_145m_01.raw	1	1	P62805|H4_HUMAN				0
QPKQPLRLQF	34.55	1253.72	10	-0.6	418.915	54.76	16500000	1	35045	200716_dc_IP79_NormalLung-W6Ab_DDA-OTOT-HCD_25cmPepMap2uTT_145m_01.raw	2	2	Q9Y2X0|MED16_HUMAN				0
TPDHVVYA	34.55	900.434	8	-1.2	451.224	40.97	71900000	1	25237	200716_dc_IP79_NormalLung-W6Ab_DDA-OTOT-HCD_25cmPepMap2uTT_145m_01.raw	2	2	Q6NZI2|CAVN1_HUMAN				0
SQPLASKQEK	34.55	1114.6	10	-0.9	558.306	25.17	5100000	1	14008	200716_dc_IP79_NormalLung-W6Ab_DDA-OTOT-HCD_25cmPepMap2uTT_145m_01.raw	1	1	P17096|HMGA1_HUMAN				0
TGNPTGTYQNG	34.55	1108.48	11	-1.6	555.246	36.41	5570000	1	22020	200716_dc_IP79_NormalLung-W6Ab_DDA-OTOT-HCD_25cmPepMap2uTT_145m_01.raw	1	1	P17844|DDX5_HUMAN				1
SYSFDEIRK	34.54	1143.56	9	-1.1	572.785	47.51	13800000	1	29970	200716_dc_IP79_NormalLung-W6Ab_DDA-OTOT-HCD_25cmPepMap2uTT_145m_01.raw	2	2	P43490|NAMPT_HUMAN				0
APKISMPDFDL	34.53	1232.61	11	-1	617.312	85.91	2770000	1	56951	200716_dc_IP79_NormalLung-W6Ab_DDA-OTOT-HCD_25cmPepMap2uTT_145m_01.raw	1	1	Q09666|AHNK_HUMAN				0
TEEGPTLSYGR	34.53	1208.57	11	0.4	605.291	48.45	4410000	1	30629	200716_dc_IP79_NormalLung-W6Ab_DDA-OTOT-HCD_25cmPepMap2uTT_145m_01.raw	1	1	P43243|MATR3_HUMAN				0
STVLQQQYNR	34.52	1235.63	10	-1.3	618.819	42.01	0	1	26056	200716_dc_IP79_NormalLung-W6Ab_DDA-OTOT-HCD_25cmPepMap2uTT_145m_01.raw	0	0	Q9Y490|TLN1_HUMAN				0
N(+.98)GLSLAALKKA	34.52	1085.64	11	0	543.83	58.26	4130000	1	37566	200716_dc_IP79_NormalLung-W6Ab_DDA-OTOT-HCD_25cmPepMap2uTT_145m_01.raw	1	1	P16401|H15_HUMAN	Deamidation (NQ)	N1:Deamidation (NQ):1000.00		0
HGFREGTTPKPK	34.51	1353.72	12	-1.5	452.245	25.86	25600000	1	14511	200716_dc_IP79_NormalLung-W6Ab_DDA-OTOT-HCD_25cmPepMap2uTT_145m_01.raw	1	1	P61927|RL37_HUMAN				1
RPRLQHSFSF	34.51	1273.67	10	-1.2	637.841	46.04	141000000	1	28884	200716_dc_IP79_NormalLung-W6Ab_DDA-OTOT-HCD_25cmPepMap2uTT_145m_01.raw	2	2	Q07352|TISB_HUMAN				1
KATGAATPKKSA	34.51	1129.65	12	-0.3	377.556	14.07	1150000	1	6137	200716_dc_IP79_NormalLung-W6Ab_DDA-OTOT-HCD_25cmPepMap2uTT_145m_01.raw	2	2	P10412|H14_HUMAN				0
KYKEKYKVK	34.5	1212.72	9	-1.8	405.248	17.72	2940000	1	8663	200716_dc_IP79_NormalLung-W6Ab_DDA-OTOT-HCD_25cmPepMap2uTT_145m_01.raw	1	1	Q5T200|ZC3HD_HUMAN				0
IVKEVSTYI	34.5	1050.6	9	-1	526.305	59.29	24800000	1	38281	200716_dc_IP79_NormalLung-W6Ab_DDA-OTOT-HCD_25cmPepMap2uTT_145m_01.raw	1	1	P68104|EF1A1_HUMAN:Q5VTE0|EF1A3_HUMAN				0
EEQKIVVKV	34.5	1070.63	9	-1.7	536.323	41.52	21700000	1	25653	200716_dc_IP79_NormalLung-W6Ab_DDA-OTOT-HCD_25cmPepMap2uTT_145m_01.raw	1	1	P49207|RL34_HUMAN				1
SYSFDEIRKNA	34.49	1328.64	11	-0.3	665.325	53.23	2890000	1	34079	200716_dc_IP79_NormalLung-W6Ab_DDA-OTOT-HCD_25cmPepMap2uTT_145m_01.raw	2	2	P43490|NAMPT_HUMAN				0
KPKMNYEKL	34.49	1149.62	9	-0.4	575.818	31.11	110000000	1	18282	200716_dc_IP79_NormalLung-W6Ab_DDA-OTOT-HCD_25cmPepMap2uTT_145m_01.raw	2	2	P15036|ETS2_HUMAN:P14921|ETS1_HUMAN				1
KKPKKATGAATPK	34.49	1324.82	13	-1.5	442.613	12.39	2180000	1	4940	200716_dc_IP79_NormalLung-W6Ab_DDA-OTOT-HCD_25cmPepMap2uTT_145m_01.raw	1	1	P10412|H14_HUMAN				0
HNDNSWIRQ	34.48	1168.54	9	-1.3	585.275	37.21	14200000	1	22752	200716_dc_IP79_NormalLung-W6Ab_DDA-OTOT-HCD_25cmPepMap2uTT_145m_01.raw	1	1	Q8WWI1|LMO7_HUMAN				0
ILKIDDVVNTR	34.48	1284.74	11	-0.2	429.254	58.2	1490000	1	37600	200716_dc_IP79_NormalLung-W6Ab_DDA-OTOT-HCD_25cmPepMap2uTT_145m_01.raw	1	1	P50991|TCPD_HUMAN				1
AGGTKPKKPVGAA	34.47	1180.69	13	-0.3	394.571	24.72	17200000	1	13563	200716_dc_IP79_NormalLung-W6Ab_DDA-OTOT-HCD_25cmPepMap2uTT_145m_01.raw	1	1	P16403|H12_HUMAN				0
RTKNFIFRT	34.47	1181.67	9	-0.8	394.896	38.78	28500000	1	23694	200716_dc_IP79_NormalLung-W6Ab_DDA-OTOT-HCD_25cmPepMap2uTT_145m_01.raw	1	1	P35869|AHR_HUMAN				0
TTVFSHAQTVVL	34.47	1301.7	12	-1	651.856	68.14	4880000	1	44538	200716_dc_IP79_NormalLung-W6Ab_DDA-OTOT-HCD_25cmPepMap2uTT_145m_01.raw	1	1	Q71UM5|RS27L_HUMAN:P42677|RS27_HUMAN				1
AAATRTTSF	34.47	924.466	9	0	463.24	33.22	40300000	1	19760	200716_dc_IP79_NormalLung-W6Ab_DDA-OTOT-HCD_25cmPepMap2uTT_145m_01.raw	1	1	Q9H3F6|BACD3_HUMAN				1
KSAVGHEY	34.46	889.429	8	-1.3	445.721	26.1	9800000	1	14727	200716_dc_IP79_NormalLung-W6Ab_DDA-OTOT-HCD_25cmPepMap2uTT_145m_01.raw	1	1	P14317|HCLS1_HUMAN:Q14247|SRC8_HUMAN				1
HVSHGHGR	34.46	885.432	8	-0.2	443.723	8.85	3640000	1	2706	200716_dc_IP79_NormalLung-W6Ab_DDA-OTOT-HCD_25cmPepMap2uTT_145m_01.raw	2	2	P46776|RL27A_HUMAN				0
VSKYPLRNL	34.45	1088.63	9	-2.2	545.323	43.97	3970000	1	27455	200716_dc_IP79_NormalLung-W6Ab_DDA-OTOT-HCD_25cmPepMap2uTT_145m_01.raw	1	1	P02751|FINC_HUMAN				1
APHPARDYVVL	34.45	1236.66	11	-2.2	619.337	50.47	4600000	1	32075	200716_dc_IP79_NormalLung-W6Ab_DDA-OTOT-HCD_25cmPepMap2uTT_145m_01.raw	1	1	Q96QB1|RHG07_HUMAN				0
TPSASTKHIL	34.43	1053.58	10	-0.3	527.798	34.1	2390000	1	20462	200716_dc_IP79_NormalLung-W6Ab_DDA-OTOT-HCD_25cmPepMap2uTT_145m_01.raw	1	1	Q8WXE0|CSKI2_HUMAN				0
HLTIKLTPAHS	34.43	1216.69	11	-0.4	406.571	40.24	1540000	1	24888	200716_dc_IP79_NormalLung-W6Ab_DDA-OTOT-HCD_25cmPepMap2uTT_145m_01.raw	1	1	O95466|FMNL1_HUMAN				0
SYTSGPGSR	34.43	910.414	9	-1.2	456.214	28.65	58000000	1	16485	200716_dc_IP79_NormalLung-W6Ab_DDA-OTOT-HCD_25cmPepMap2uTT_145m_01.raw	2	2	P05787|K2C8_HUMAN				0
RVKYGTVFK	34.42	1096.64	9	-1.1	366.553	32.66	16100000	1	19492	200716_dc_IP79_NormalLung-W6Ab_DDA-OTOT-HCD_25cmPepMap2uTT_145m_01.raw	1	1	Q96ST3|SIN3A_HUMAN				1
RLKSIKNIQK	34.42	1226.78	10	-1.2	409.934	26.1	2120000	1	14739	200716_dc_IP79_NormalLung-W6Ab_DDA-OTOT-HCD_25cmPepMap2uTT_145m_01.raw	1	1	P36542|ATPG_HUMAN				1
HM(+15.99)YHSLYLK	34.41	1206.59	9	-0.4	403.202	35.04	2970000	1	21088	200716_dc_IP79_NormalLung-W6Ab_DDA-OTOT-HCD_25cmPepMap2uTT_145m_01.raw	1	1	P84098|RL19_HUMAN	Oxidation (M)	M2:Oxidation (M):1000.00		0
VLSPADKTNVK	34.41	1170.66	11	-1	586.337	31.4	1940000	1	18525	200716_dc_IP79_NormalLung-W6Ab_DDA-OTOT-HCD_25cmPepMap2uTT_145m_01.raw	1	1	P69905|HBA_HUMAN				1
SPSEIVKQI	34.39	999.56	9	-1.4	500.787	52.78	47100000	1	33878	200716_dc_IP79_NormalLung-W6Ab_DDA-OTOT-HCD_25cmPepMap2uTT_145m_01.raw	2	2	P60866|RS20_HUMAN				0
RLKAQM(+15.99)IEK	34.39	1131.64	9	-0.1	378.222	25.91	82300000	1	14546	200716_dc_IP79_NormalLung-W6Ab_DDA-OTOT-HCD_25cmPepMap2uTT_145m_01.raw	2	2	Q13813|SPTN1_HUMAN	Oxidation (M)	M6:Oxidation (M):1000.00		0
TLVSEQTRVNA	34.38	1216.64	11	-1.9	609.327	44.57	50600000	1	27819	200716_dc_IP79_NormalLung-W6Ab_DDA-OTOT-HCD_25cmPepMap2uTT_145m_01.raw	2	2	P46776|RL27A_HUMAN				0
STIPPELVKQK	34.38	1238.72	11	0	413.915	42.5	15000000	1	26495	200716_dc_IP79_NormalLung-W6Ab_DDA-OTOT-HCD_25cmPepMap2uTT_145m_01.raw	2	2	Q9BVS4|RIOK2_HUMAN				1
KVYTKSSHLK	34.38	1189.68	10	-0.2	397.568	20.07	8260000	1	10175	200716_dc_IP79_NormalLung-W6Ab_DDA-OTOT-HCD_25cmPepMap2uTT_145m_01.raw	1	1	Q13887|KLF5_HUMAN:P57682|KLF3_HUMAN:Q99612|KLF6_HUMAN:O75840|KLF7_HUMAN:Q9Y4X4|KLF12_HUMAN:O95600|KLF8_HUMAN				1
SFDLDYDFQRD	34.38	1419.59	11	-1.5	710.803	79.88	2160000	1	52694	200716_dc_IP79_NormalLung-W6Ab_DDA-OTOT-HCD_25cmPepMap2uTT_145m_01.raw	1	1	P07910|HNRPC_HUMAN				0
M(+15.99)PKISMPGF	34.37	1022.49	9	-0.5	512.254	69.58	10300000	1	45622	200716_dc_IP79_NormalLung-W6Ab_DDA-OTOT-HCD_25cmPepMap2uTT_145m_01.raw	1	1	Q09666|AHNK_HUMAN	Oxidation (M)	M1:Oxidation (M):38.77		0
SDGYGSGRGF	34.37	1001.42	10	0	501.717	45.7	16100000	1	28715	200716_dc_IP79_NormalLung-W6Ab_DDA-OTOT-HCD_25cmPepMap2uTT_145m_01.raw	2	2	P22626|ROA2_HUMAN				1
AVFPSIVGRPR	34.37	1197.7	11	0.6	400.24	55.3	3460000	1	35531	200716_dc_IP79_NormalLung-W6Ab_DDA-OTOT-HCD_25cmPepMap2uTT_145m_01.raw	1	1	P60709|ACTB_HUMAN:P63261|ACTG_HUMAN:P68032|ACTC_HUMAN:P62736|ACTA_HUMAN:P68133|ACTS_HUMAN:P63267|ACTH_HUMAN:A5A3E0|POTEF_HUMAN:Q6S8J3|POTEE_HUMAN:P0CG38|POTEI_HUMAN:Q9BYX7|ACTBM_HUMAN				1
HAVSEGTK	34.37	827.414	8	-1.4	414.714	13.4	305000	1	5717	200716_dc_IP79_NormalLung-W6Ab_DDA-OTOT-HCD_25cmPepMap2uTT_145m_01.raw	1	1	P62807|H2B1C_HUMAN:O60814|H2B1K_HUMAN:P57053|H2BFS_HUMAN:Q93079|H2B1H_HUMAN:Q5QNW6|H2B2F_HUMAN:Q16778|H2B2E_HUMAN:P06899|H2B1J_HUMAN:Q99877|H2B1N_HUMAN:P58876|H2B1D_HUMAN:Q99880|H2B1L_HUMAN:P23527|H2B1O_HUMAN:Q8N257|H2B3B_HUMAN:P33778|H2B1B_HUMAN:Q99879|H2B1M_HUMAN:Q96A08|H2B1A_HUMAN				1
ALKTGIVAK	34.36	899.58	9	-1.3	450.797	30.38	2790000	1	17779	200716_dc_IP79_NormalLung-W6Ab_DDA-OTOT-HCD_25cmPepMap2uTT_145m_01.raw	1	1	Q9BQ61|TRIR_HUMAN				1
TITRVNSPGTLA	34.36	1228.68	12	0.7	615.346	47.37	3520000	1	29856	200716_dc_IP79_NormalLung-W6Ab_DDA-OTOT-HCD_25cmPepMap2uTT_145m_01.raw	1	1	P53814|SMTN_HUMAN				0
AEEAARLSVAA	34.36	1086.57	11	-0.9	544.29	45.85	3640000	1	28844	200716_dc_IP79_NormalLung-W6Ab_DDA-OTOT-HCD_25cmPepMap2uTT_145m_01.raw	1	1	Q15149|PLEC_HUMAN				0
RVLDALVAREK	34.35	1268.76	11	-0.5	423.926	45.35	15500000	1	28402	200716_dc_IP79_NormalLung-W6Ab_DDA-OTOT-HCD_25cmPepMap2uTT_145m_01.raw	1	1	Q8IUR0|TPPC5_HUMAN				1
M(+15.99)PNGTPHPTA	34.33	1037.46	10	-0.5	519.737	29.73	8970000	1	17336	200716_dc_IP79_NormalLung-W6Ab_DDA-OTOT-HCD_25cmPepMap2uTT_145m_01.raw	1	1	Q96PU8|QKI_HUMAN	Oxidation (M)	M1:Oxidation (M):1000.00		0
HYGSLPQK	34.33	928.477	8	-0.2	465.245	29.35	0	1	17046	200716_dc_IP79_NormalLung-W6Ab_DDA-OTOT-HCD_25cmPepMap2uTT_145m_01.raw	0	0	P02686|MBP_HUMAN				0
GYDVEKNN	34.33	937.414	8	-0.9	469.714	30.23	6530000	1	17665	200716_dc_IP79_NormalLung-W6Ab_DDA-OTOT-HCD_25cmPepMap2uTT_145m_01.raw	1	1	P16403|H12_HUMAN:P10412|H14_HUMAN:P16402|H13_HUMAN:P16401|H15_HUMAN:Q02539|H11_HUMAN:P22492|H1T_HUMAN				0
RYLQSVRPLM(+15.99)	34.32	1277.69	10	-1.1	639.852	46.78	6540000	1	29472	200716_dc_IP79_NormalLung-W6Ab_DDA-OTOT-HCD_25cmPepMap2uTT_145m_01.raw	2	2	P50416|CPT1A_HUMAN	Oxidation (M)	M10:Oxidation (M):1000.00		0
NANEMFRIF	34.31	1140.54	9	-0.3	571.276	83.88	4050000	1	55483	200716_dc_IP79_NormalLung-W6Ab_DDA-OTOT-HCD_25cmPepMap2uTT_145m_01.raw	1	1	Q14204|DYHC1_HUMAN				1
APYSRPKQL	34.3	1058.59	9	-1.4	530.3	33.42	51900000	1	19894	200716_dc_IP79_NormalLung-W6Ab_DDA-OTOT-HCD_25cmPepMap2uTT_145m_01.raw	2	2	Q86V81|THOC4_HUMAN				1
RVKVISGQFL	34.3	1145.69	10	0	573.853	55.25	48800000	1	35381	200716_dc_IP79_NormalLung-W6Ab_DDA-OTOT-HCD_25cmPepMap2uTT_145m_01.raw	2	2	Q01970|PLCB3_HUMAN				0
HGSGTQYVSTR	34.3	1191.56	11	-1.5	596.788	27.81	817000	1	15971	200716_dc_IP79_NormalLung-W6Ab_DDA-OTOT-HCD_25cmPepMap2uTT_145m_01.raw	1	1	Q96B23|CR025_HUMAN				0
KPRKPAGAA	34.3	894.54	9	-0.6	448.277	13.2	34600000	1	5767	200716_dc_IP79_NormalLung-W6Ab_DDA-OTOT-HCD_25cmPepMap2uTT_145m_01.raw	2	2	P16402|H13_HUMAN				1
ISVSRSTSF	34.3	982.508	9	-2.1	983.514	47.87	23300000	1	30240	200716_dc_IP79_NormalLung-W6Ab_DDA-OTOT-HCD_25cmPepMap2uTT_145m_01.raw	1	1	P05783|K1C18_HUMAN				1
STRYPPPAV	34.29	986.519	9	-0.1	494.266	41.81	247000000	1	26025	200716_dc_IP79_NormalLung-W6Ab_DDA-OTOT-HCD_25cmPepMap2uTT_145m_01.raw	2	2	P12111|CO6A3_HUMAN				1
EEQAKEVTA	34.28	1003.48	9	-1.2	502.748	28.75	9250000	1	16624	200716_dc_IP79_NormalLung-W6Ab_DDA-OTOT-HCD_25cmPepMap2uTT_145m_01.raw	1	1	Q04637|IF4G1_HUMAN				1
EEDVLKFLA	34.28	1062.56	9	-0.8	532.287	86.95	22600000	1	57644	200716_dc_IP79_NormalLung-W6Ab_DDA-OTOT-HCD_25cmPepMap2uTT_145m_01.raw	1	1	P08865|RSSA_HUMAN				1
EEAKKFRKA	34.28	1105.62	9	-0.8	553.819	16.1	7080000	1	7579	200716_dc_IP79_NormalLung-W6Ab_DDA-OTOT-HCD_25cmPepMap2uTT_145m_01.raw	2	2	O00401|WASL_HUMAN				1
HLYDPKM(+15.99)Q	34.28	1046.49	8	-1.4	524.249	31.35	7910000	1	18430	200716_dc_IP79_NormalLung-W6Ab_DDA-OTOT-HCD_25cmPepMap2uTT_145m_01.raw	1	1	Q15417|CNN3_HUMAN	Oxidation (M)	M7:Oxidation (M):1000.00		0
TPEEKLAAL	34.28	970.533	9	-1	486.274	54.36	10300000	1	34820	200716_dc_IP79_NormalLung-W6Ab_DDA-OTOT-HCD_25cmPepMap2uTT_145m_01.raw	1	1	P40222|TXLNA_HUMAN:Q9BZA5|TXNG2_HUMAN:Q9NUQ3|TXLNG_HUMAN				1
AEERDKRLAA	34.28	1157.62	10	-0.5	386.879	25.91	8410000	1	14544	200716_dc_IP79_NormalLung-W6Ab_DDA-OTOT-HCD_25cmPepMap2uTT_145m_01.raw	1	1	P62701|RS4X_HUMAN:Q8TD47|RS4Y2_HUMAN				1
KAAKVVPVKAK	34.28	1137.76	11	-0.1	380.26	24.75	596000	1	13712	200716_dc_IP79_NormalLung-W6Ab_DDA-OTOT-HCD_25cmPepMap2uTT_145m_01.raw	1	1	P19338|NUCL_HUMAN				0
GPKPPQRVM(+15.99)F	34.28	1171.62	10	-2.4	391.545	41.66	26200000	1	25890	200716_dc_IP79_NormalLung-W6Ab_DDA-OTOT-HCD_25cmPepMap2uTT_145m_01.raw	1	1	P07858|CATB_HUMAN	Oxidation (M)	M9:Oxidation (M):1000.00		0
QPPFAFRHVL	34.28	1210.66	10	-1	404.56	63.24	0	1	41130	200716_dc_IP79_NormalLung-W6Ab_DDA-OTOT-HCD_25cmPepMap2uTT_145m_01.raw	0	0	P05107|ITB2_HUMAN				0
YYPTEDVPR	34.28	1138.53	9	-1.1	570.271	50.27	1080000	1	31975	200716_dc_IP79_NormalLung-W6Ab_DDA-OTOT-HCD_25cmPepMap2uTT_145m_01.raw	1	1	Q02878|RL6_HUMAN				1
KVKTPQPKK	34.27	1052.67	9	-1	527.342	15.28	73200000	1	7063	200716_dc_IP79_NormalLung-W6Ab_DDA-OTOT-HCD_25cmPepMap2uTT_145m_01.raw	2	2	P16402|H13_HUMAN				1
QC(+119.00)TQVRVEF	34.27	1227.54	9	-1.1	614.775	52.54	18600000	1	33519	200716_dc_IP79_NormalLung-W6Ab_DDA-OTOT-HCD_25cmPepMap2uTT_145m_01.raw	1	1	P62857|RS28_HUMAN	Cysteinylation	C2:Cysteinylation:1000.00		0
ATFKLAHV	34.27	885.507	8	-1.2	443.76	44.39	0	1	27756	200716_dc_IP79_NormalLung-W6Ab_DDA-OTOT-HCD_25cmPepMap2uTT_145m_01.raw	0	0	P50453|SPB9_HUMAN				0
KVPPFTFHVK	34.27	1198.69	10	-0.3	400.569	47.66	8990000	1	30388	200716_dc_IP79_NormalLung-W6Ab_DDA-OTOT-HCD_25cmPepMap2uTT_145m_01.raw	2	2	Q6NZI2|CAVN1_HUMAN				1
SPQARTALL	34.27	955.545	9	-1.2	478.779	45.45	12100000	1	28476	200716_dc_IP79_NormalLung-W6Ab_DDA-OTOT-HCD_25cmPepMap2uTT_145m_01.raw	1	1	P35590|TIE1_HUMAN				1
SSNPALALRRK	34.27	1211.71	11	-0.4	404.91	30.62	5580000	1	17922	200716_dc_IP79_NormalLung-W6Ab_DDA-OTOT-HCD_25cmPepMap2uTT_145m_01.raw	1	1	Q5T011|SZT2_HUMAN				0
TENSTSAPAAKP	34.26	1172.57	12	-1.3	587.29	29.44	2890000	1	17129	200716_dc_IP79_NormalLung-W6Ab_DDA-OTOT-HCD_25cmPepMap2uTT_145m_01.raw	1	1	P07305|H10_HUMAN				0
FAYDGKDYI	34.26	1090.5	9	-0.2	546.256	69.33	63000000	1	45340	200716_dc_IP79_NormalLung-W6Ab_DDA-OTOT-HCD_25cmPepMap2uTT_145m_01.raw	1	1	Q29836|1B67_HUMAN:Q31612|1B73_HUMAN:Q95365|1B38_HUMAN:P30475|1B39_HUMAN:P30462|1B14_HUMAN:P30504|1C04_HUMAN:P30505|1C08_HUMAN:Q29865|1C18_HUMAN:Q9TNN7|1C05_HUMAN:P18463|1B37_HUMAN:Q95604|1C17_HUMAN				1
FAYDGKDYL	34.26	1090.5	9	-0.2	546.256	69.33	63000000	1	45340	200716_dc_IP79_NormalLung-W6Ab_DDA-OTOT-HCD_25cmPepMap2uTT_145m_01.raw	1	1	P13747|HLAE_HUMAN				1
HSSQTQGGGSVTK	34.26	1272.61	13	-0.4	637.31	16.74	575000	1	8034	200716_dc_IP79_NormalLung-W6Ab_DDA-OTOT-HCD_25cmPepMap2uTT_145m_01.raw	1	1	P02545|LMNA_HUMAN				0
EEIFDSRIA	34.26	1078.53	9	-0.7	1079.54	63.64	100000000	1	41342	200716_dc_IP79_NormalLung-W6Ab_DDA-OTOT-HCD_25cmPepMap2uTT_145m_01.raw	2	2	Q8NHV1|GIMA7_HUMAN				1
Q(-17.03)PLKKLVSF	34.25	1041.62	9	-0.6	521.818	79.29	12600000	1	52440	200716_dc_IP79_NormalLung-W6Ab_DDA-OTOT-HCD_25cmPepMap2uTT_145m_01.raw	2	2	Q08AF3|SLFN5_HUMAN	Pyro-glu from Q	Q1:Pyro-glu from Q:1000.00		0
SEAKPAAVAA	34.25	913.487	10	-0.3	457.75	29.93	159000000	1	17424	200716_dc_IP79_NormalLung-W6Ab_DDA-OTOT-HCD_25cmPepMap2uTT_145m_01.raw	2	2	Q9Y490|TLN1_HUMAN				1
KM(+15.99)KEALLSIGK	34.24	1232.72	11	0	411.913	36.86	8410000	1	22323	200716_dc_IP79_NormalLung-W6Ab_DDA-OTOT-HCD_25cmPepMap2uTT_145m_01.raw	1	1	Q96C01|F136A_HUMAN	Oxidation (M)	M2:Oxidation (M):1000.00		0
HVSHGHGRIGKH	34.24	1320.69	12	-1.1	441.237	13.88	1510000	1	6011	200716_dc_IP79_NormalLung-W6Ab_DDA-OTOT-HCD_25cmPepMap2uTT_145m_01.raw	1	1	P46776|RL27A_HUMAN				1
KQKYDYFRK	34.24	1274.68	9	-0.6	425.899	29.05	2750000	1	16858	200716_dc_IP79_NormalLung-W6Ab_DDA-OTOT-HCD_25cmPepMap2uTT_145m_01.raw	1	1	Q96PU5|NED4L_HUMAN				0
APRTPGRHGL	34.23	1060.59	10	-1.1	354.537	27.03	4500000	1	15383	200716_dc_IP79_NormalLung-W6Ab_DDA-OTOT-HCD_25cmPepMap2uTT_145m_01.raw	1	1	Q96M96|FGD4_HUMAN				1
TYSLGSALRPS	34.21	1150.6	11	-0.6	576.306	59	67200000	1	38350	200716_dc_IP79_NormalLung-W6Ab_DDA-OTOT-HCD_25cmPepMap2uTT_145m_01.raw	2	2	P08670|VIME_HUMAN				0
VATIKSVSF	34.21	950.544	9	0.1	476.279	57.37	15100000	1	36904	200716_dc_IP79_NormalLung-W6Ab_DDA-OTOT-HCD_25cmPepMap2uTT_145m_01.raw	1	1	P49768|PSN1_HUMAN				1
APYM(+15.99)RSMM(+15.99)QSL	34.21	1345.58	11	0.4	673.799	47.37	10500000	1	30287	200716_dc_IP79_NormalLung-W6Ab_DDA-OTOT-HCD_25cmPepMap2uTT_145m_01.raw	2	2	Q9UMX0|UBQL1_HUMAN:Q9UHD9|UBQL2_HUMAN	Oxidation (M)	M4:Oxidation (M):12.16;M8:Oxidation (M):9.34		0
KSKEFVQKV	34.21	1091.63	9	-0.4	546.824	27.08	132000000	1	15419	200716_dc_IP79_NormalLung-W6Ab_DDA-OTOT-HCD_25cmPepMap2uTT_145m_01.raw	2	2	P49585|PCY1A_HUMAN				1
RPSLRQSHSL	34.21	1179.65	10	-1	394.223	29.64	7220000	1	17292	200716_dc_IP79_NormalLung-W6Ab_DDA-OTOT-HCD_25cmPepMap2uTT_145m_01.raw	1	1	Q2M1Z3|RHG31_HUMAN				1
IALNEKLVNL	34.2	1125.68	10	-2.2	563.844	74.69	1740000	1	49046	200716_dc_IP79_NormalLung-W6Ab_DDA-OTOT-HCD_25cmPepMap2uTT_145m_01.raw	1	1	O00303|EIF3F_HUMAN				1
IPFEFPLHL	34.2	1111.61	9	-1.8	556.81	101.98	6950000	1	68258	200716_dc_IP79_NormalLung-W6Ab_DDA-OTOT-HCD_25cmPepMap2uTT_145m_01.raw	1	1	O14972|VP26C_HUMAN				1
SRPIDTSRLTK	34.2	1272.71	11	-2.2	425.245	32.86	1140000	1	19581	200716_dc_IP79_NormalLung-W6Ab_DDA-OTOT-HCD_25cmPepMap2uTT_145m_01.raw	1	1	Q04637|IF4G1_HUMAN				0
AEQQKAQFTA	34.2	1120.55	10	-0.6	561.283	34.6	1940000	1	20838	200716_dc_IP79_NormalLung-W6Ab_DDA-OTOT-HCD_25cmPepMap2uTT_145m_01.raw	1	1	Q9Y5J9|TIM8B_HUMAN				1
HESQKDYVK	34.2	1132.55	9	0.3	378.524	23.72	1670000	1	13045	200716_dc_IP79_NormalLung-W6Ab_DDA-OTOT-HCD_25cmPepMap2uTT_145m_01.raw	1	1	Q14247|SRC8_HUMAN				0
HEAIHTGAK	34.2	962.493	9	-1	482.253	16.1	166000	1	7623	200716_dc_IP79_NormalLung-W6Ab_DDA-OTOT-HCD_25cmPepMap2uTT_145m_01.raw	1	1	P56270|MAZ_HUMAN				0
DRVYIHPFH	34.2	1182.59	9	-1.1	395.205	45.77	0	1	28743	200716_dc_IP79_NormalLung-W6Ab_DDA-OTOT-HCD_25cmPepMap2uTT_145m_01.raw	0	0	P01019|ANGT_HUMAN				0
AEMEKQKVA	34.19	1032.53	9	-1.1	517.27	26.2	5910000	1	14803	200716_dc_IP79_NormalLung-W6Ab_DDA-OTOT-HCD_25cmPepMap2uTT_145m_01.raw	1	1	Q9H3S7|PTN23_HUMAN				1
YATVHQSY	34.19	967.44	8	-0.4	484.727	36.91	1670000	1	22465	200716_dc_IP79_NormalLung-W6Ab_DDA-OTOT-HCD_25cmPepMap2uTT_145m_01.raw	1	1	Q8WWM7|ATX2L_HUMAN				1
RDTTVKPGAK	34.18	1071.6	10	1	358.209	18.01	1710000	1	8927	200716_dc_IP79_NormalLung-W6Ab_DDA-OTOT-HCD_25cmPepMap2uTT_145m_01.raw	1	1	O95994|AGR2_HUMAN				0
GNFGGSRNM(+15.99)GGP	34.18	1165.49	12	0	583.754	32.04	1670000	1	18956	200716_dc_IP79_NormalLung-W6Ab_DDA-OTOT-HCD_25cmPepMap2uTT_145m_01.raw	1	1	P22626|ROA2_HUMAN	Oxidation (M)	M9:Oxidation (M):1000.00		0
SVKTPKISM(+15.99)	34.18	1005.55	9	-1.8	503.783	32.04	12800000	1	18788	200716_dc_IP79_NormalLung-W6Ab_DDA-OTOT-HCD_25cmPepMap2uTT_145m_01.raw	1	1	Q09666|AHNK_HUMAN	Oxidation (M)	M9:Oxidation (M):1000.00		0
MEEKHM(+15.99)PPP	34.18	1110.48	9	-0.7	556.249	26.4	8910000	1	14931	200716_dc_IP79_NormalLung-W6Ab_DDA-OTOT-HCD_25cmPepMap2uTT_145m_01.raw	1	1	P11308|ERG_HUMAN	Oxidation (M)	M6:Oxidation (M):37.99		0
TPAKSPGK	34.17	784.444	8	-0.6	393.229	13.01	2900000	1	5310	200716_dc_IP79_NormalLung-W6Ab_DDA-OTOT-HCD_25cmPepMap2uTT_145m_01.raw	2	2	Q5SSJ5|HP1B3_HUMAN				0
RPYEKGRLIIEF	34.16	1519.85	12	-1	507.624	59.4	308000000	1	38212	200716_dc_IP79_NormalLung-W6Ab_DDA-OTOT-HCD_25cmPepMap2uTT_145m_01.raw	1	1	P31689|DNJA1_HUMAN				1
TYSLGSALRPSTS	34.16	1338.68	13	-2.3	670.345	54.76	178000000	1	35138	200716_dc_IP79_NormalLung-W6Ab_DDA-OTOT-HCD_25cmPepMap2uTT_145m_01.raw	5	5	P08670|VIME_HUMAN				1
SLLGVKENNKK	34.16	1228.71	11	-0.4	410.578	28.21	3640000	1	16238	200716_dc_IP79_NormalLung-W6Ab_DDA-OTOT-HCD_25cmPepMap2uTT_145m_01.raw	1	1	Q15287|RNPS1_HUMAN				0
RVKEFKQSL	34.16	1133.66	9	-0.1	378.892	30.96	20500000	1	18170	200716_dc_IP79_NormalLung-W6Ab_DDA-OTOT-HCD_25cmPepMap2uTT_145m_01.raw	2	2	Q9UG22|GIMA2_HUMAN				0
AEDDRKAFA	34.15	1021.48	9	-1	511.748	29.44	9990000	1	17090	200716_dc_IP79_NormalLung-W6Ab_DDA-OTOT-HCD_25cmPepMap2uTT_145m_01.raw	1	1	Q9BY89|K1671_HUMAN				0
RPKDWYKTM(+15.99)F	34.14	1386.68	10	-1.8	463.232	46.92	2220000	1	29586	200716_dc_IP79_NormalLung-W6Ab_DDA-OTOT-HCD_25cmPepMap2uTT_145m_01.raw	1	1	O94875|SRBS2_HUMAN	Oxidation (M)	M9:Oxidation (M):1000.00		0
AEEESQRINA	34.13	1145.53	10	-1.4	573.772	32.23	4230000	1	19085	200716_dc_IP79_NormalLung-W6Ab_DDA-OTOT-HCD_25cmPepMap2uTT_145m_01.raw	1	1	P35749|MYH11_HUMAN				0
IVKDASIIHRL	34.13	1263.77	11	0.7	422.263	45.9	9970000	1	28806	200716_dc_IP79_NormalLung-W6Ab_DDA-OTOT-HCD_25cmPepMap2uTT_145m_01.raw	1	1	A2RUS2|DEND3_HUMAN				0
HPRLSLHRPAL	34.13	1295.76	11	-1.4	432.926	40.78	10600000	1	25067	200716_dc_IP79_NormalLung-W6Ab_DDA-OTOT-HCD_25cmPepMap2uTT_145m_01.raw	1	1	P01876|IGHA1_HUMAN:P01877|IGHA2_HUMAN:P0DOX2|IGA2_HUMAN				1
HPFPESKPVL	34.13	1149.62	10	-0.8	575.816	47.86	31200000	1	30442	200716_dc_IP79_NormalLung-W6Ab_DDA-OTOT-HCD_25cmPepMap2uTT_145m_01.raw	1	1	Q15005|SPCS2_HUMAN				1
LPKQPPLML	34.12	1035.62	9	-0.6	518.814	69.68	968000	1	45711	200716_dc_IP79_NormalLung-W6Ab_DDA-OTOT-HCD_25cmPepMap2uTT_145m_01.raw	1	1	Q6VN20|RBP10_HUMAN				1
STFFYPKLK	34.11	1129.62	9	-1.6	565.815	57.96	7970000	1	37443	200716_dc_IP79_NormalLung-W6Ab_DDA-OTOT-HCD_25cmPepMap2uTT_145m_01.raw	2	2	Q9HC62|SENP2_HUMAN				1
TVKTHLTSL	34.11	998.576	9	-0.8	500.295	37.99	17500000	1	23180	200716_dc_IP79_NormalLung-W6Ab_DDA-OTOT-HCD_25cmPepMap2uTT_145m_01.raw	1	1	Q15631|TSN_HUMAN				1
APTQEKIFAVL	34.11	1215.69	11	-0.9	608.85	76.62	2490000	1	50387	200716_dc_IP79_NormalLung-W6Ab_DDA-OTOT-HCD_25cmPepMap2uTT_145m_01.raw	1	1	P51825|AFF1_HUMAN				1
RLSDVLKRK	34.1	1113.7	9	0.3	372.24	31.35	11900000	1	18418	200716_dc_IP79_NormalLung-W6Ab_DDA-OTOT-HCD_25cmPepMap2uTT_145m_01.raw	1	1	Q14669|TRIPC_HUMAN				1
TGQKAAPAPK	34.09	967.545	10	-1.4	484.779	18.11	3370000	1	8932	200716_dc_IP79_NormalLung-W6Ab_DDA-OTOT-HCD_25cmPepMap2uTT_145m_01.raw	1	1	P50914|RL14_HUMAN				0
NPEKRYNVL	34.08	1131.6	9	-1.1	566.808	38.38	7330000	1	23451	200716_dc_IP79_NormalLung-W6Ab_DDA-OTOT-HCD_25cmPepMap2uTT_145m_01.raw	1	1	Q1KMD3|HNRL2_HUMAN				1
KGEKVPKGK	34.08	969.597	9	-1	485.805	12.26	666000	1	4858	200716_dc_IP79_NormalLung-W6Ab_DDA-OTOT-HCD_25cmPepMap2uTT_145m_01.raw	1	1	P05204|HMGN2_HUMAN				0
SPNKLYTL	34.07	934.512	8	-1.1	468.263	52.44	62000000	1	33373	200716_dc_IP79_NormalLung-W6Ab_DDA-OTOT-HCD_25cmPepMap2uTT_145m_01.raw	2	2	P62899|RL31_HUMAN				1
AEMNGKLIAA	34.07	1016.53	10	-1.7	509.273	47.71	6330000	1	30106	200716_dc_IP79_NormalLung-W6Ab_DDA-OTOT-HCD_25cmPepMap2uTT_145m_01.raw	1	1	Q9Y6Y0|NS1BP_HUMAN				1
HSDKPLKAKGR	34.06	1235.71	11	-0.7	412.91	12.91	375000	1	5364	200716_dc_IP79_NormalLung-W6Ab_DDA-OTOT-HCD_25cmPepMap2uTT_145m_01.raw	1	1	Q9UIG0|BAZ1B_HUMAN				0
APKPQDKKSM(+15.99)	34.06	1144.59	10	0.1	573.303	12.96	1970000	1	5408	200716_dc_IP79_NormalLung-W6Ab_DDA-OTOT-HCD_25cmPepMap2uTT_145m_01.raw	2	2	Q9H2P0|ADNP_HUMAN	Oxidation (M)	M10:Oxidation (M):1000.00		0
TDLFGRDLSY	34.05	1185.57	10	-0.7	593.79	78.3	924000	1	51609	200716_dc_IP79_NormalLung-W6Ab_DDA-OTOT-HCD_25cmPepMap2uTT_145m_01.raw	1	1	P52597|HNRPF_HUMAN				1
HVKDANGNSF	34.05	1087.5	10	-0.8	544.759	27.82	1680000	1	15990	200716_dc_IP79_NormalLung-W6Ab_DDA-OTOT-HCD_25cmPepMap2uTT_145m_01.raw	1	1	P62701|RS4X_HUMAN:Q8TD47|RS4Y2_HUMAN:P22090|RS4Y1_HUMAN				1
KWKDIELEKM(+15.99)	34.05	1334.69	10	-1.4	445.903	42.84	8250000	1	26601	200716_dc_IP79_NormalLung-W6Ab_DDA-OTOT-HCD_25cmPepMap2uTT_145m_01.raw	1	1	Q8N6T3|ARFG1_HUMAN	Oxidation (M)	M10:Oxidation (M):1000.00		0
KGKYKFLQK	34.05	1138.69	9	-0.9	380.569	27.23	29300000	1	15489	200716_dc_IP79_NormalLung-W6Ab_DDA-OTOT-HCD_25cmPepMap2uTT_145m_01.raw	1	1	P55081|MFAP1_HUMAN				1
MPKFSMPSL	34.05	1036.51	9	-0.6	519.261	80.83	8540000	1	53588	200716_dc_IP79_NormalLung-W6Ab_DDA-OTOT-HCD_25cmPepMap2uTT_145m_01.raw	1	1	Q09666|AHNK_HUMAN				1
EEQRPERVKP	34.04	1266.67	10	-2	423.229	26.49	51700000	1	14890	200716_dc_IP79_NormalLung-W6Ab_DDA-OTOT-HCD_25cmPepMap2uTT_145m_01.raw	2	2	P13693|TCTP_HUMAN				1
GC(+119.00)FREIDELIKK	34.03	1568.77	12	-1	523.93	52.29	11300000	1	33327	200716_dc_IP79_NormalLung-W6Ab_DDA-OTOT-HCD_25cmPepMap2uTT_145m_01.raw	1	1	Q9Y3A5|SBDS_HUMAN	Cysteinylation	C2:Cysteinylation:1000.00		0
HTRLAGEERVF	34.03	1313.68	11	-1.1	438.901	40.39	1310000	1	24902	200716_dc_IP79_NormalLung-W6Ab_DDA-OTOT-HCD_25cmPepMap2uTT_145m_01.raw	1	1	Q9NYF8|BCLF1_HUMAN				0
GTC(+119.00)SPLRHSF	34.03	1222.52	10	-1.5	612.268	34.9	66900000	1	20915	200716_dc_IP79_NormalLung-W6Ab_DDA-OTOT-HCD_25cmPepMap2uTT_145m_01.raw	2	2	P35611|ADDA_HUMAN	Cysteinylation	C3:Cysteinylation:1000.00		0
TDTSRYTGSHKE	34.03	1380.63	12	-0.8	461.216	26.1	33300000	1	14694	200716_dc_IP79_NormalLung-W6Ab_DDA-OTOT-HCD_25cmPepMap2uTT_145m_01.raw	1	1	Q9BW30|TPPP3_HUMAN				0
TSYNRGDSTFES	34.01	1362.57	12	-1.6	682.29	41.4	0	1	25629	200716_dc_IP79_NormalLung-W6Ab_DDA-OTOT-HCD_25cmPepMap2uTT_145m_01.raw	0	0	P02671|FIBA_HUMAN				1
AEEEAATRIPA	34.01	1156.57	11	-0.4	579.293	42.94	17000000	1	26668	200716_dc_IP79_NormalLung-W6Ab_DDA-OTOT-HCD_25cmPepMap2uTT_145m_01.raw	1	1	Q13409|DC1I2_HUMAN				1
AAQEAVKLY	34.01	991.534	9	-0.9	496.774	49.83	14100000	1	31576	200716_dc_IP79_NormalLung-W6Ab_DDA-OTOT-HCD_25cmPepMap2uTT_145m_01.raw	1	1	O60506|HNRPQ_HUMAN				1
TGASLADIMAK	34	1076.55	11	-0.9	539.284	64.08	3290000	1	41712	200716_dc_IP79_NormalLung-W6Ab_DDA-OTOT-HCD_25cmPepMap2uTT_145m_01.raw	1	1	P83731|RL24_HUMAN				1
AEAEFYRQV	34	1111.53	9	-1.5	556.771	52.99	42700000	1	33786	200716_dc_IP79_NormalLung-W6Ab_DDA-OTOT-HCD_25cmPepMap2uTT_145m_01.raw	2	2	Q6W2J9|BCOR_HUMAN				1
TVTAM(+15.99)DVVYALK	34	1325.69	12	-0.9	663.852	72.34	1900000	1	47485	200716_dc_IP79_NormalLung-W6Ab_DDA-OTOT-HCD_25cmPepMap2uTT_145m_01.raw	1	1	P62805|H4_HUMAN	Oxidation (M)	M5:Oxidation (M):1000.00		0
IVKEIHEQL	34	1107.63	9	-1.2	554.821	42.01	6390000	1	26013	200716_dc_IP79_NormalLung-W6Ab_DDA-OTOT-HCD_25cmPepMap2uTT_145m_01.raw	1	1	P29728|OAS2_HUMAN				1
VPNPSLKTF	33.99	1001.55	9	-1.2	501.784	55.74	1660000	1	35848	200716_dc_IP79_NormalLung-W6Ab_DDA-OTOT-HCD_25cmPepMap2uTT_145m_01.raw	1	1	C9JLW8|MCRI1_HUMAN				1
TEAKPAVVA	33.99	884.497	9	-1.3	443.255	33.02	0	1	19665	200716_dc_IP79_NormalLung-W6Ab_DDA-OTOT-HCD_25cmPepMap2uTT_145m_01.raw	0	0	Q12906|ILF3_HUMAN				1
TRPSSTVIKKP	33.99	1212.72	11	-1.2	405.247	28.16	12700000	1	16008	200716_dc_IP79_NormalLung-W6Ab_DDA-OTOT-HCD_25cmPepMap2uTT_145m_01.raw	1	1	Q5SSJ5|HP1B3_HUMAN				0
SPGGVYAT	33.98	750.355	8	-2	751.361	41.87	1220000	1	25956	200716_dc_IP79_NormalLung-W6Ab_DDA-OTOT-HCD_25cmPepMap2uTT_145m_01.raw	1	1	P08670|VIME_HUMAN				0
SATGNSILGQR	33.98	1102.57	11	-0.7	552.293	42.08	0	1	26102	200716_dc_IP79_NormalLung-W6Ab_DDA-OTOT-HCD_25cmPepMap2uTT_145m_01.raw	0	0	Q8WWP7|GIMA1_HUMAN				0
APNEKM(+15.99)KQVL	33.98	1172.62	10	-2.6	587.317	28.75	2190000	1	16646	200716_dc_IP79_NormalLung-W6Ab_DDA-OTOT-HCD_25cmPepMap2uTT_145m_01.raw	1	1	P57076|CF298_HUMAN	Oxidation (M)	M6:Oxidation (M):1000.00		0
KPAPPKPEPKPK	33.98	1312.79	12	-1.2	438.602	25.17	1660000	1	13996	200716_dc_IP79_NormalLung-W6Ab_DDA-OTOT-HCD_25cmPepMap2uTT_145m_01.raw	1	1	P05204|HMGN2_HUMAN				1
RFVSVSKLK	33.97	1062.65	9	0.3	355.226	33.51	1590000	1	20077	200716_dc_IP79_NormalLung-W6Ab_DDA-OTOT-HCD_25cmPepMap2uTT_145m_01.raw	1	1	O95070|YIF1A_HUMAN				0
YAIVRFNQY	33.97	1172.6	9	-1.9	587.305	67.21	3440000	1	43978	200716_dc_IP79_NormalLung-W6Ab_DDA-OTOT-HCD_25cmPepMap2uTT_145m_01.raw	1	1	Q9HBU6|EKI1_HUMAN				1
RPLSKTVRFNVL	33.97	1428.86	12	-1.2	477.292	51.45	5350000	1	32779	200716_dc_IP79_NormalLung-W6Ab_DDA-OTOT-HCD_25cmPepMap2uTT_145m_01.raw	1	1	P62280|RS11_HUMAN				0
NRGDSTFESK	33.97	1139.52	10	0	570.768	26.69	11500000	1	15123	200716_dc_IP79_NormalLung-W6Ab_DDA-OTOT-HCD_25cmPepMap2uTT_145m_01.raw	2	2	P02671|FIBA_HUMAN				1
VPRPAVLDPAL	33.96	1146.68	11	-1.2	574.345	68	19700000	1	44394	200716_dc_IP79_NormalLung-W6Ab_DDA-OTOT-HCD_25cmPepMap2uTT_145m_01.raw	1	1	P26006|ITA3_HUMAN				1
SSYGGPASQQLS	33.96	1180.54	12	-0.2	591.275	50.12	2980000	1	31822	200716_dc_IP79_NormalLung-W6Ab_DDA-OTOT-HCD_25cmPepMap2uTT_145m_01.raw	1	1	P55795|HNRH2_HUMAN:P31943|HNRH1_HUMAN				1
YAFVRPVIL	33.96	1076.64	9	-1.2	539.326	80.43	2920000	1	53084	200716_dc_IP79_NormalLung-W6Ab_DDA-OTOT-HCD_25cmPepMap2uTT_145m_01.raw	1	1	Q96S16|JMJD8_HUMAN				1
LPVGRSVDETL	33.96	1184.64	11	-0.5	593.327	57.42	11100000	1	36964	200716_dc_IP79_NormalLung-W6Ab_DDA-OTOT-HCD_25cmPepMap2uTT_145m_01.raw	1	1	Q06830|PRDX1_HUMAN:Q13162|PRDX4_HUMAN				0
LPYDRNISNYF	33.96	1400.67	11	-1.1	701.343	80.03	3070000	1	52794	200716_dc_IP79_NormalLung-W6Ab_DDA-OTOT-HCD_25cmPepMap2uTT_145m_01.raw	1	1	Q6ZNJ1|NBEL2_HUMAN:Q6ZS30|NBEL1_HUMAN				0
VGALRVLAY	33.94	960.576	9	-1.8	961.581	66.52	136000000	1	43391	200716_dc_IP79_NormalLung-W6Ab_DDA-OTOT-HCD_25cmPepMap2uTT_145m_01.raw	2	2	P08571|CD14_HUMAN				1
SPADIVKNL	33.94	955.534	9	-1	478.774	69.23	11500000	1	45444	200716_dc_IP79_NormalLung-W6Ab_DDA-OTOT-HCD_25cmPepMap2uTT_145m_01.raw	1	1	Q9Y376|CAB39_HUMAN				0
KIKQVDSVLK	33.94	1156.72	10	0.9	386.58	32.71	6030000	1	19421	200716_dc_IP79_NormalLung-W6Ab_DDA-OTOT-HCD_25cmPepMap2uTT_145m_01.raw	2	2	Q8WXH0|SYNE2_HUMAN				1
APENKAFVL	33.94	987.539	9	-0.4	494.776	56.43	5740000	1	36228	200716_dc_IP79_NormalLung-W6Ab_DDA-OTOT-HCD_25cmPepMap2uTT_145m_01.raw	1	1	P04275|VWF_HUMAN				0
RPKYPGIKF	33.93	1104.64	9	-2.1	369.221	43.33	41200000	1	26878	200716_dc_IP79_NormalLung-W6Ab_DDA-OTOT-HCD_25cmPepMap2uTT_145m_01.raw	2	2	P45984|MK09_HUMAN				1
KGGKGLGK	33.92	743.465	8	0	372.74	10.54	1130000	1	3695	200716_dc_IP79_NormalLung-W6Ab_DDA-OTOT-HCD_25cmPepMap2uTT_145m_01.raw	1	1	P62805|H4_HUMAN				0
EPSKELSKRQF	33.91	1347.71	11	-0.4	450.245	32.62	19300000	1	19349	200716_dc_IP79_NormalLung-W6Ab_DDA-OTOT-HCD_25cmPepMap2uTT_145m_01.raw	1	1	Q9ULG6|CCPG1_HUMAN				0
SEQVFKVAS	33.91	993.513	9	-0.5	497.764	47.12	7770000	1	29664	200716_dc_IP79_NormalLung-W6Ab_DDA-OTOT-HCD_25cmPepMap2uTT_145m_01.raw	1	1	O75955|FLOT1_HUMAN				0
TATAVAHC(+119.00)K	33.91	1019.45	9	-0.7	510.733	15.81	1970000	1	7379	200716_dc_IP79_NormalLung-W6Ab_DDA-OTOT-HCD_25cmPepMap2uTT_145m_01.raw	1	1	P62249|RS16_HUMAN	Cysteinylation	C8:Cysteinylation:1000.00		0
HFDLSHGS	33.9	898.393	8	0	450.204	34.7	5590000	1	20835	200716_dc_IP79_NormalLung-W6Ab_DDA-OTOT-HCD_25cmPepMap2uTT_145m_01.raw	1	1	P69905|HBA_HUMAN				0
KM(+15.99)QDTSEMKKK	33.9	1368.67	11	-1.5	457.231	13.2	557000	1	5546	200716_dc_IP79_NormalLung-W6Ab_DDA-OTOT-HCD_25cmPepMap2uTT_145m_01.raw	1	1	P46939|UTRO_HUMAN	Oxidation (M)	M2:Oxidation (M):33.66		0
RTRELPDGTFY	33.88	1353.67	11	-0.5	677.841	52.09	24100000	1	33198	200716_dc_IP79_NormalLung-W6Ab_DDA-OTOT-HCD_25cmPepMap2uTT_145m_01.raw	2	2	Q9UPY3|DICER_HUMAN				1
MPKIKMPKF	33.88	1118.63	9	-0.3	373.885	56.19	6460000	1	35987	200716_dc_IP79_NormalLung-W6Ab_DDA-OTOT-HCD_25cmPepMap2uTT_145m_01.raw	1	1	Q09666|AHNK_HUMAN				1
TTPTYGDLNH	33.87	1117.5	10	-0.7	559.759	44.52	1510000	1	27904	200716_dc_IP79_NormalLung-W6Ab_DDA-OTOT-HCD_25cmPepMap2uTT_145m_01.raw	1	1	P07437|TBB5_HUMAN:P68371|TBB4B_HUMAN:P04350|TBB4A_HUMAN:Q9BVA1|TBB2B_HUMAN:Q13885|TBB2A_HUMAN:Q9BUF5|TBB6_HUMAN:Q9H4B7|TBB1_HUMAN				1
Q(-17.03)PASFAVSL	33.87	901.455	9	-0.8	902.461	108.86	1870000	1	73195	200716_dc_IP79_NormalLung-W6Ab_DDA-OTOT-HCD_25cmPepMap2uTT_145m_01.raw	1	1	P21333|FLNA_HUMAN	Pyro-glu from Q	Q1:Pyro-glu from Q:1000.00		0
VMAPRTLIL	33.87	1012.61	9	-0.1	507.312	69.63	2950000	1	45655	200716_dc_IP79_NormalLung-W6Ab_DDA-OTOT-HCD_25cmPepMap2uTT_145m_01.raw	1	1	Q29960|1C16_HUMAN:P04222|1C03_HUMAN:P30504|1C04_HUMAN:P30505|1C08_HUMAN:Q29963|1C06_HUMAN:P30510|1C14_HUMAN:Q9TNN7|1C05_HUMAN:P30508|1C12_HUMAN				1
VMAPRTLLL	33.87	1012.61	9	-0.1	507.312	69.63	2950000	1	45655	200716_dc_IP79_NormalLung-W6Ab_DDA-OTOT-HCD_25cmPepMap2uTT_145m_01.raw	1	1	Q07000|1C15_HUMAN:P30455|1A36_HUMAN:P04439|1A03_HUMAN:P13746|1A11_HUMAN:P30443|1A01_HUMAN:P16188|1A30_HUMAN:P16190|1A33_HUMAN:P30459|1A74_HUMAN:P10314|1A32_HUMAN:P30512|1A29_HUMAN:P16189|1A31_HUMAN				1
KTKKEIKKVATPK	33.87	1497.96	13	0.1	375.498	19.31	11400000	1	10214	200716_dc_IP79_NormalLung-W6Ab_DDA-OTOT-HCD_25cmPepMap2uTT_145m_01.raw	2	2	P07305|H10_HUMAN				0
YPKTGVTGPYVL	33.85	1293.7	12	-0.4	647.856	67.75	773000	1	44320	200716_dc_IP79_NormalLung-W6Ab_DDA-OTOT-HCD_25cmPepMap2uTT_145m_01.raw	1	1	P24539|AT5F1_HUMAN				0
RPHQKSVGF	33.84	1054.57	9	-1.5	352.529	26.93	10000000	1	15305	200716_dc_IP79_NormalLung-W6Ab_DDA-OTOT-HCD_25cmPepMap2uTT_145m_01.raw	1	1	Q93009|UBP7_HUMAN				1
RVQKIRPSI	33.84	1095.69	9	-1.2	366.236	30.57	12000000	1	17856	200716_dc_IP79_NormalLung-W6Ab_DDA-OTOT-HCD_25cmPepMap2uTT_145m_01.raw	1	1	Q9H3M7|TXNIP_HUMAN				1
MFLSFPTTK	33.83	1070.55	9	-1.6	536.28	76.07	6420000	1	49966	200716_dc_IP79_NormalLung-W6Ab_DDA-OTOT-HCD_25cmPepMap2uTT_145m_01.raw	1	1	P69905|HBA_HUMAN				1
TAAQVARVL	33.83	927.55	9	-1.3	464.782	47.56	6090000	1	30028	200716_dc_IP79_NormalLung-W6Ab_DDA-OTOT-HCD_25cmPepMap2uTT_145m_01.raw	1	1	A5YKK6|CNOT1_HUMAN				1
SLYASSPGGVY	33.82	1099.52	11	-0.6	550.766	67.4	14400000	1	44062	200716_dc_IP79_NormalLung-W6Ab_DDA-OTOT-HCD_25cmPepMap2uTT_145m_01.raw	2	2	P08670|VIME_HUMAN				1
SKGTLVQTK	33.81	960.56	9	-1.4	481.287	25.61	20700000	1	14324	200716_dc_IP79_NormalLung-W6Ab_DDA-OTOT-HCD_25cmPepMap2uTT_145m_01.raw	2	2	P16403|H12_HUMAN:P10412|H14_HUMAN:P16402|H13_HUMAN:P16401|H15_HUMAN:Q02539|H11_HUMAN				0
KPYVDGKGREL	33.81	1260.68	11	-1.3	421.234	30.67	4630000	1	17987	200716_dc_IP79_NormalLung-W6Ab_DDA-OTOT-HCD_25cmPepMap2uTT_145m_01.raw	1	1	Q13813|SPTN1_HUMAN				1
KTKDVEILHL	33.8	1194.7	10	-0.8	399.239	48.3	6210000	1	30528	200716_dc_IP79_NormalLung-W6Ab_DDA-OTOT-HCD_25cmPepMap2uTT_145m_01.raw	1	1	Q69YQ0|CYTSA_HUMAN				1
RIWKLSDVDRDG	33.8	1458.76	12	-0.4	487.26	50.42	3320000	1	32060	200716_dc_IP79_NormalLung-W6Ab_DDA-OTOT-HCD_25cmPepMap2uTT_145m_01.raw	1	1	Q9NZN4|EHD2_HUMAN				0
SM(+15.99)KM(+15.99)VAAAK	33.8	967.483	9	-0.6	484.748	15.23	1070000	1	6968	200716_dc_IP79_NormalLung-W6Ab_DDA-OTOT-HCD_25cmPepMap2uTT_145m_01.raw	1	1	P36542|ATPG_HUMAN	Oxidation (M)	M2:Oxidation (M):1000.00;M4:Oxidation (M):1000.00		0
KPAPAKPVA	33.8	877.538	9	-0.8	439.776	25.56	3160000	1	14305	200716_dc_IP79_NormalLung-W6Ab_DDA-OTOT-HCD_25cmPepMap2uTT_145m_01.raw	1	1	P12111|CO6A3_HUMAN				1
RPKEDTQKLL	33.8	1226.7	10	-0.5	409.906	30.96	5680000	1	18211	200716_dc_IP79_NormalLung-W6Ab_DDA-OTOT-HCD_25cmPepMap2uTT_145m_01.raw	1	1	Q8NFG4|FLCN_HUMAN				0
APNSSKFIFM(+15.99)L	33.8	1269.64	11	-1.6	635.828	81.32	1110000	1	53764	200716_dc_IP79_NormalLung-W6Ab_DDA-OTOT-HCD_25cmPepMap2uTT_145m_01.raw	1	1	P28370|SMCA1_HUMAN	Oxidation (M)	M10:Oxidation (M):1000.00		0
FGNLRPVL	33.8	914.534	8	-1.2	458.274	65.17	2490000	1	42512	200716_dc_IP79_NormalLung-W6Ab_DDA-OTOT-HCD_25cmPepMap2uTT_145m_01.raw	1	1	P11215|ITAM_HUMAN				1
AEKLYFSDA	33.79	1042.5	9	-0.4	522.256	55.35	2140000	1	35592	200716_dc_IP79_NormalLung-W6Ab_DDA-OTOT-HCD_25cmPepMap2uTT_145m_01.raw	1	1	Q07954|LRP1_HUMAN				0
HAKSGGTAL	33.79	840.445	9	-0.8	421.23	18.06	2790000	1	8922	200716_dc_IP79_NormalLung-W6Ab_DDA-OTOT-HCD_25cmPepMap2uTT_145m_01.raw	1	1	O14974|MYPT1_HUMAN				0
TVKAKPVK	33.79	869.57	8	-0.2	435.792	13.69	9610000	1	5841	200716_dc_IP79_NormalLung-W6Ab_DDA-OTOT-HCD_25cmPepMap2uTT_145m_01.raw	2	2	P07305|H10_HUMAN				0
YAYDGKDYIAL	33.78	1290.61	11	-0.8	646.313	74.25	2380000	1	48769	200716_dc_IP79_NormalLung-W6Ab_DDA-OTOT-HCD_25cmPepMap2uTT_145m_01.raw	1	1	P30480|1B42_HUMAN:P01889|1B07_HUMAN:Q31610|1B81_HUMAN:P04222|1C03_HUMAN:P30460|1B08_HUMAN:P30486|1B48_HUMAN:P30499|1C01_HUMAN:P05534|1A24_HUMAN:P30447|1A23_HUMAN:P30479|1B41_HUMAN:Q04826|1B40_HUMAN:P18464|1B51_HUMAN:P30498|1B78_HUMAN:P30490|1B52_HUMAN:P01892|1A02_HUMAN:P10316|1A69_HUMAN				1
YAYDGKDYLAL	33.78	1290.61	11	-0.8	646.313	74.25	2380000	1	48769	200716_dc_IP79_NormalLung-W6Ab_DDA-OTOT-HCD_25cmPepMap2uTT_145m_01.raw	1	1	P17693|HLAG_HUMAN				1
SGGTTM(+15.99)YPGIADR	33.78	1340.6	13	-1.4	671.308	46.33	1580000	1	29168	200716_dc_IP79_NormalLung-W6Ab_DDA-OTOT-HCD_25cmPepMap2uTT_145m_01.raw	1	1	P60709|ACTB_HUMAN:P63261|ACTG_HUMAN:P68032|ACTC_HUMAN:P62736|ACTA_HUMAN:P68133|ACTS_HUMAN:P63267|ACTH_HUMAN	Oxidation (M)	M6:Oxidation (M):1000.00		0
LPSGNNNGKVL	33.77	1111.6	11	-0.1	556.807	42.01	6610000	1	26003	200716_dc_IP79_NormalLung-W6Ab_DDA-OTOT-HCD_25cmPepMap2uTT_145m_01.raw	1	1	Q96CB8|INT12_HUMAN				1
NPNGDKTKVM(+15.99)V	33.77	1217.61	11	-1	609.81	29.49	3100000	1	17158	200716_dc_IP79_NormalLung-W6Ab_DDA-OTOT-HCD_25cmPepMap2uTT_145m_01.raw	1	1	O15144|ARPC2_HUMAN	Oxidation (M)	M10:Oxidation (M):1000.00		0
MPNVKVAVF	33.76	1003.55	9	-0.1	502.783	70.42	16200000	1	46099	200716_dc_IP79_NormalLung-W6Ab_DDA-OTOT-HCD_25cmPepMap2uTT_145m_01.raw	1	1	Q13838|DX39B_HUMAN				1
AEENFRSISA	33.76	1122.53	10	-1.1	562.272	48.35	1970000	1	30602	200716_dc_IP79_NormalLung-W6Ab_DDA-OTOT-HCD_25cmPepMap2uTT_145m_01.raw	1	1	Q5SRH9|TT39A_HUMAN				1
FFDTASTGK	33.76	972.455	9	-1.3	487.234	44.72	4080000	1	27986	200716_dc_IP79_NormalLung-W6Ab_DDA-OTOT-HCD_25cmPepMap2uTT_145m_01.raw	1	1	P02671|FIBA_HUMAN				0
AEQEAQRAQL	33.76	1142.57	10	1.3	572.292	34.89	15400000	1	20851	200716_dc_IP79_NormalLung-W6Ab_DDA-OTOT-HCD_25cmPepMap2uTT_145m_01.raw	1	1	Q9NUV9|GIMA4_HUMAN				1
YSLGSALRPSTS	33.75	1237.63	12	-0.8	619.822	58.36	3040000	1	37620	200716_dc_IP79_NormalLung-W6Ab_DDA-OTOT-HCD_25cmPepMap2uTT_145m_01.raw	1	1	P08670|VIME_HUMAN				0
VPHPKKPEHTL	33.75	1281.72	11	-0.8	641.866	27.77	96200000	1	15957	200716_dc_IP79_NormalLung-W6Ab_DDA-OTOT-HCD_25cmPepMap2uTT_145m_01.raw	2	2	P32456|GBP2_HUMAN:Q9H0R5|GBP3_HUMAN				1
KVKSEC(+119.00)HRV	33.75	1203.59	9	-0.3	402.202	12.77	127000	1	5274	200716_dc_IP79_NormalLung-W6Ab_DDA-OTOT-HCD_25cmPepMap2uTT_145m_01.raw	1	1	Q5JRA6|TGO1_HUMAN	Cysteinylation	C6:Cysteinylation:1000.00		0
KLLSHGKKPF	33.74	1153.7	10	-0.5	385.573	29.73	2720000	1	17334	200716_dc_IP79_NormalLung-W6Ab_DDA-OTOT-HCD_25cmPepMap2uTT_145m_01.raw	1	1	Q02878|RL6_HUMAN				1
HPIQGHRVEVK	33.74	1298.72	11	-2	433.913	25.81	4280000	1	14531	200716_dc_IP79_NormalLung-W6Ab_DDA-OTOT-HCD_25cmPepMap2uTT_145m_01.raw	1	1	Q13151|ROA0_HUMAN				0
Q(-17.03)GYVIYRIRVR	33.74	1404.8	11	-1.4	469.273	65.26	12500000	1	42535	200716_dc_IP79_NormalLung-W6Ab_DDA-OTOT-HCD_25cmPepMap2uTT_145m_01.raw	1	1	P61313|RL15_HUMAN	Pyro-glu from Q	Q1:Pyro-glu from Q:1000.00		0
YPTISLHAL	33.74	1013.55	9	-0.6	507.784	74.94	1950000	1	49194	200716_dc_IP79_NormalLung-W6Ab_DDA-OTOT-HCD_25cmPepMap2uTT_145m_01.raw	1	1	P54105|ICLN_HUMAN				1
AEAPPPSVV	33.73	865.455	9	-0.7	433.734	51.69	8630000	1	32961	200716_dc_IP79_NormalLung-W6Ab_DDA-OTOT-HCD_25cmPepMap2uTT_145m_01.raw	1	1	Q92841|DDX17_HUMAN				1
NATAVVRHM(+15.99)	33.72	1013.51	9	-1	507.761	26.73	6390000	1	15178	200716_dc_IP79_NormalLung-W6Ab_DDA-OTOT-HCD_25cmPepMap2uTT_145m_01.raw	1	1	Q14012|KCC1A_HUMAN:Q8IU85|KCC1D_HUMAN	Oxidation (M)	M9:Oxidation (M):1000.00		0
NLGHGHKHER	33.72	1183.6	10	-0.2	395.539	12.16	186000	1	4834	200716_dc_IP79_NormalLung-W6Ab_DDA-OTOT-HCD_25cmPepMap2uTT_145m_01.raw	1	1	P01042|KNG1_HUMAN				0
HPHAVNEIAL	33.71	1099.58	10	-0.8	550.795	45.37	0	1	28457	200716_dc_IP79_NormalLung-W6Ab_DDA-OTOT-HCD_25cmPepMap2uTT_145m_01.raw	0	0	Q96PY5|FMNL2_HUMAN:Q8IVF7|FMNL3_HUMAN				1
NYATVISHNPETK	33.7	1472.73	13	-1.8	737.369	42.44	0	1	26365	200716_dc_IP79_NormalLung-W6Ab_DDA-OTOT-HCD_25cmPepMap2uTT_145m_01.raw	0	0	P62917|RL8_HUMAN				0
ATKSPAKPK	33.7	926.555	9	-0.5	464.284	12.21	20000000	1	4707	200716_dc_IP79_NormalLung-W6Ab_DDA-OTOT-HCD_25cmPepMap2uTT_145m_01.raw	2	2	P16401|H15_HUMAN				1
THSQGGYGSQG	33.7	1077.45	11	-1.7	539.73	25.78	586000	1	14438	200716_dc_IP79_NormalLung-W6Ab_DDA-OTOT-HCD_25cmPepMap2uTT_145m_01.raw	1	1	Q9Y285|SYFA_HUMAN				0
TPNKEKTEA	33.7	1016.51	9	-0.3	509.264	14.84	2630000	1	6633	200716_dc_IP79_NormalLung-W6Ab_DDA-OTOT-HCD_25cmPepMap2uTT_145m_01.raw	1	1	P41218|MNDA_HUMAN				0
AEHPIVIVC(+119.00)G	33.69	1155.54	10	-1.7	578.777	47.86	3510000	1	30291	200716_dc_IP79_NormalLung-W6Ab_DDA-OTOT-HCD_25cmPepMap2uTT_145m_01.raw	2	2	Q8IY37|DHX37_HUMAN	Cysteinylation	C9:Cysteinylation:1000.00		0
HFGGGKTT	33.69	803.393	8	-0.4	402.703	18.71	540000	1	9412	200716_dc_IP79_NormalLung-W6Ab_DDA-OTOT-HCD_25cmPepMap2uTT_145m_01.raw	1	1	P62847|RS24_HUMAN				1
SPAPTHNSL	33.69	922.451	9	-1	462.232	32.04	2580000	1	18988	200716_dc_IP79_NormalLung-W6Ab_DDA-OTOT-HCD_25cmPepMap2uTT_145m_01.raw	1	1	P49327|FAS_HUMAN				1
GTKEGYLTK	33.68	995.529	9	-1.4	498.771	27.86	8980000	1	15977	200716_dc_IP79_NormalLung-W6Ab_DDA-OTOT-HCD_25cmPepMap2uTT_145m_01.raw	1	1	Q9UN19|DAPP1_HUMAN				1
EEEQPGKAP	33.68	983.456	9	-1.3	492.735	28.65	69100000	1	16511	200716_dc_IP79_NormalLung-W6Ab_DDA-OTOT-HCD_25cmPepMap2uTT_145m_01.raw	2	2	Q8TBC5|ZSC18_HUMAN				0
RPYAAGGKKL	33.68	1059.62	10	-0.7	354.213	26.01	6920000	1	14623	200716_dc_IP79_NormalLung-W6Ab_DDA-OTOT-HCD_25cmPepMap2uTT_145m_01.raw	1	1	Q9H7U1|CCSE2_HUMAN				1
TRNQETYETLK	33.68	1381.68	11	-0.9	461.568	33.05	1300000	1	19705	200716_dc_IP79_NormalLung-W6Ab_DDA-OTOT-HCD_25cmPepMap2uTT_145m_01.raw	1	1	P30273|FCERG_HUMAN				1
EELFPLQVV	33.68	1072.58	9	-1.5	537.297	104.89	3510000	1	70361	200716_dc_IP79_NormalLung-W6Ab_DDA-OTOT-HCD_25cmPepMap2uTT_145m_01.raw	1	1	Q2M389|WASC4_HUMAN				1
TYLKYSIK	33.67	1014.58	8	-2.1	508.294	44.52	15800000	1	27798	200716_dc_IP79_NormalLung-W6Ab_DDA-OTOT-HCD_25cmPepMap2uTT_145m_01.raw	1	1	Q92522|H1X_HUMAN				0
TPALSPC(+119.00)AV	33.67	976.436	9	-0.2	489.225	56.34	1290000	1	36294	200716_dc_IP79_NormalLung-W6Ab_DDA-OTOT-HCD_25cmPepMap2uTT_145m_01.raw	1	1	P10914|IRF1_HUMAN	Cysteinylation	C7:Cysteinylation:1000.00		0
M(+15.99)PKVKMPKF	33.67	1120.61	9	-0.4	374.545	43.33	89500000	1	26756	200716_dc_IP79_NormalLung-W6Ab_DDA-OTOT-HCD_25cmPepMap2uTT_145m_01.raw	2	2	Q09666|AHNK_HUMAN	Oxidation (M)	M1:Oxidation (M):46.62		0
TDTSRYTG	33.67	899.398	8	-0.2	450.706	29.14	12900000	1	16903	200716_dc_IP79_NormalLung-W6Ab_DDA-OTOT-HCD_25cmPepMap2uTT_145m_01.raw	2	2	Q9BW30|TPPP3_HUMAN				0
YTRPTPVQK	33.67	1088.6	9	-0.5	545.306	28.55	69300000	1	16468	200716_dc_IP79_NormalLung-W6Ab_DDA-OTOT-HCD_25cmPepMap2uTT_145m_01.raw	2	2	O00571|DDX3X_HUMAN:O15523|DDX3Y_HUMAN				1
AEQDELSQRLA	33.66	1258.62	11	-1.2	630.314	51.5	12600000	1	32767	200716_dc_IP79_NormalLung-W6Ab_DDA-OTOT-HCD_25cmPepMap2uTT_145m_01.raw	1	1	Q7LBR1|CHM1B_HUMAN				1
KVKITTENV	33.66	1030.6	9	-1.1	516.308	32.95	16100000	1	19624	200716_dc_IP79_NormalLung-W6Ab_DDA-OTOT-HCD_25cmPepMap2uTT_145m_01.raw	1	1	Q6TFL4|KLH24_HUMAN				1
LPASVHPQL	33.66	960.539	9	-1.1	481.276	52.83	4710000	1	33773	200716_dc_IP79_NormalLung-W6Ab_DDA-OTOT-HCD_25cmPepMap2uTT_145m_01.raw	1	1	Q9H0K1|SIK2_HUMAN				1
AVKDVAKAL	33.66	913.56	9	-0.6	457.787	39.32	11700000	1	24111	200716_dc_IP79_NormalLung-W6Ab_DDA-OTOT-HCD_25cmPepMap2uTT_145m_01.raw	1	1	Q9Y490|TLN1_HUMAN				1
GEHDKM(+15.99)VAA	33.65	972.433	9	-0.8	487.224	22.78	19700000	1	12143	200716_dc_IP79_NormalLung-W6Ab_DDA-OTOT-HCD_25cmPepMap2uTT_145m_01.raw	2	2	Q8TBC3|SHKB1_HUMAN	Oxidation (M)	M6:Oxidation (M):1000.00		0
SEQVTRWAA	33.65	1046.51	9	-1.5	524.264	46.53	5780000	1	29262	200716_dc_IP79_NormalLung-W6Ab_DDA-OTOT-HCD_25cmPepMap2uTT_145m_01.raw	1	1	Q06546|GABPA_HUMAN				0
TVIDEVRTGTY	33.65	1252.63	11	-0.9	627.322	63.78	6810000	1	41501	200716_dc_IP79_NormalLung-W6Ab_DDA-OTOT-HCD_25cmPepMap2uTT_145m_01.raw	1	1	P68363|TBA1B_HUMAN:Q71U36|TBA1A_HUMAN:Q9BQE3|TBA1C_HUMAN				1
YIKNSNPAL	33.65	1018.54	9	-1.2	510.279	40.19	26900000	1	24732	200716_dc_IP79_NormalLung-W6Ab_DDA-OTOT-HCD_25cmPepMap2uTT_145m_01.raw	1	1	O00299|CLIC1_HUMAN				0
KPFDKFQFERL	33.65	1453.77	11	-1.4	485.597	62.91	19200000	1	40770	200716_dc_IP79_NormalLung-W6Ab_DDA-OTOT-HCD_25cmPepMap2uTT_145m_01.raw	2	2	P47897|SYQ_HUMAN				0
AEAHAQAKA	33.65	895.451	9	-0.7	448.733	13.54	588000	1	5770	200716_dc_IP79_NormalLung-W6Ab_DDA-OTOT-HCD_25cmPepMap2uTT_145m_01.raw	1	1	Q15149|PLEC_HUMAN				1
AEQLEDKKRKA	33.64	1314.73	11	-0.9	439.249	17.67	2410000	1	8634	200716_dc_IP79_NormalLung-W6Ab_DDA-OTOT-HCD_25cmPepMap2uTT_145m_01.raw	1	1	O95394|AGM1_HUMAN				1
RSSKTFKPK	33.64	1077.63	9	-1.7	360.216	14.64	604000	1	6561	200716_dc_IP79_NormalLung-W6Ab_DDA-OTOT-HCD_25cmPepMap2uTT_145m_01.raw	1	1	Q9H8S9|MOB1A_HUMAN:Q7L9L4|MOB1B_HUMAN				1
VPKRDHALL	33.64	1047.62	9	-1.2	524.816	30.77	19500000	1	17928	200716_dc_IP79_NormalLung-W6Ab_DDA-OTOT-HCD_25cmPepMap2uTT_145m_01.raw	1	1	O43707|ACTN4_HUMAN				0
SVFAEERNLK	33.63	1191.62	10	-2	596.818	42.08	2750000	1	26121	200716_dc_IP79_NormalLung-W6Ab_DDA-OTOT-HCD_25cmPepMap2uTT_145m_01.raw	2	2	Q14966|ZN638_HUMAN				1
KLRQPFFQK	33.63	1190.69	9	-1.2	397.904	38.23	50800000	1	23310	200716_dc_IP79_NormalLung-W6Ab_DDA-OTOT-HCD_25cmPepMap2uTT_145m_01.raw	2	2	Q01105|SET_HUMAN:P0DME0|SETLP_HUMAN				1
FEGFPDKQPRK	33.62	1347.69	11	-0.9	450.238	37.6	2450000	1	22898	200716_dc_IP79_NormalLung-W6Ab_DDA-OTOT-HCD_25cmPepMap2uTT_145m_01.raw	1	1	P26447|S10A4_HUMAN				0
KVDISKVSSK	33.62	1089.64	10	-0.8	364.22	27.82	1720000	1	15988	200716_dc_IP79_NormalLung-W6Ab_DDA-OTOT-HCD_25cmPepMap2uTT_145m_01.raw	1	1	P27816|MAP4_HUMAN				1
HPYQRIVTA	33.62	1083.58	9	0	542.798	35.48	6180000	1	21396	200716_dc_IP79_NormalLung-W6Ab_DDA-OTOT-HCD_25cmPepMap2uTT_145m_01.raw	1	1	Q96PU8|QKI_HUMAN				1
NLSKEDDVRQY	33.62	1365.65	11	-0.9	456.224	38.43	4750000	1	23506	200716_dc_IP79_NormalLung-W6Ab_DDA-OTOT-HCD_25cmPepMap2uTT_145m_01.raw	1	1	P62753|RS6_HUMAN				1
GSTRIPKVQK	33.62	1112.67	10	-2.2	371.895	27.43	15500000	1	15535	200716_dc_IP79_NormalLung-W6Ab_DDA-OTOT-HCD_25cmPepMap2uTT_145m_01.raw	1	1	P17066|HSP76_HUMAN:P0DMV8|HS71A_HUMAN:P0DMV9|HS71B_HUMAN				1
AEM(+15.99)EKQKVA	33.61	1048.52	9	-0.4	525.268	17.47	10900000	1	8817	200716_dc_IP79_NormalLung-W6Ab_DDA-OTOT-HCD_25cmPepMap2uTT_145m_01.raw	1	1	Q9H3S7|PTN23_HUMAN	Oxidation (M)	M3:Oxidation (M):1000.00		0
EEGRAEGAVA	33.61	987.462	10	-0.8	494.738	28.85	3710000	1	16721	200716_dc_IP79_NormalLung-W6Ab_DDA-OTOT-HCD_25cmPepMap2uTT_145m_01.raw	1	1	Q9BXM0|PRAX_HUMAN				0
RIFEPPPPK	33.61	1079.61	9	-0.6	540.813	39.61	27400000	1	24137	200716_dc_IP79_NormalLung-W6Ab_DDA-OTOT-HCD_25cmPepMap2uTT_145m_01.raw	2	2	O43143|DHX15_HUMAN				1
TWVQLKRQPAPP	33.61	1419.8	12	-1.3	710.906	50.8	5500000	1	32325	200716_dc_IP79_NormalLung-W6Ab_DDA-OTOT-HCD_25cmPepMap2uTT_145m_01.raw	1	1	P46778|RL21_HUMAN				0
FVHYGEVTNDFV	33.6	1425.66	12	0.5	713.836	73.9	0	1	48524	200716_dc_IP79_NormalLung-W6Ab_DDA-OTOT-HCD_25cmPepMap2uTT_145m_01.raw	0	0	P39023|RL3_HUMAN				0
RVKDKVYHL	33.6	1156.67	9	-0.5	579.343	29	187000000	1	16767	200716_dc_IP79_NormalLung-W6Ab_DDA-OTOT-HCD_25cmPepMap2uTT_145m_01.raw	2	2	P25791|RBTN2_HUMAN				1
KFQAHKPAKSK	33.6	1268.74	11	-1.8	423.918	14.21	5440000	1	6155	200716_dc_IP79_NormalLung-W6Ab_DDA-OTOT-HCD_25cmPepMap2uTT_145m_01.raw	2	2	Q9UNZ5|L10K_HUMAN				0
SPADHRGYASL	33.6	1172.56	11	-0.9	587.285	39.37	2870000	1	24201	200716_dc_IP79_NormalLung-W6Ab_DDA-OTOT-HCD_25cmPepMap2uTT_145m_01.raw	1	1	Q06945|SOX4_HUMAN				1
REM(+15.99)EENFAV	33.59	1139.49	9	-1.3	570.752	47.81	26500000	1	30144	200716_dc_IP79_NormalLung-W6Ab_DDA-OTOT-HCD_25cmPepMap2uTT_145m_01.raw	1	1	P08670|VIME_HUMAN	Oxidation (M)	M3:Oxidation (M):1000.00		0
KEPPIFRKK	33.59	1141.7	9	-1.6	381.572	28.01	3120000	1	16098	200716_dc_IP79_NormalLung-W6Ab_DDA-OTOT-HCD_25cmPepMap2uTT_145m_01.raw	2	2	Q8WZ42|TITIN_HUMAN				0
TEKRDFVSA	33.58	1051.53	9	-1.3	526.771	31.55	17300000	1	18593	200716_dc_IP79_NormalLung-W6Ab_DDA-OTOT-HCD_25cmPepMap2uTT_145m_01.raw	1	1	P51798|CLCN7_HUMAN				1
TPHQTFVRL	33.58	1097.6	9	-0.1	549.806	46.43	11800000	1	29226	200716_dc_IP79_NormalLung-W6Ab_DDA-OTOT-HCD_25cmPepMap2uTT_145m_01.raw	2	2	P04844|RPN2_HUMAN				1
FVKVYNYNH	33.58	1182.58	9	-0.9	395.201	43.58	4210000	1	27193	200716_dc_IP79_NormalLung-W6Ab_DDA-OTOT-HCD_25cmPepMap2uTT_145m_01.raw	1	1	P61353|RL27_HUMAN				0
EEANKAFSA	33.57	965.445	9	-1	483.729	35.53	19700000	1	21395	200716_dc_IP79_NormalLung-W6Ab_DDA-OTOT-HCD_25cmPepMap2uTT_145m_01.raw	1	1	Q9Y4A5|TRRAP_HUMAN				1
AASLRKVSM	33.57	961.538	9	-1.4	481.776	33.61	4720000	1	20065	200716_dc_IP79_NormalLung-W6Ab_DDA-OTOT-HCD_25cmPepMap2uTT_145m_01.raw	1	1	Q7L1Q6|BZW1_HUMAN				1
KPRDVSSVELL	33.57	1241.7	11	-0.9	621.856	52.59	128000000	1	33493	200716_dc_IP79_NormalLung-W6Ab_DDA-OTOT-HCD_25cmPepMap2uTT_145m_01.raw	2	2	Q01082|SPTB2_HUMAN				1
HLGEPHGK	33.57	873.446	8	-0.9	437.73	18.41	184000	1	9192	200716_dc_IP79_NormalLung-W6Ab_DDA-OTOT-HCD_25cmPepMap2uTT_145m_01.raw	1	1	Q14241|ELOA1_HUMAN				0
SEEPAEILPPA	33.56	1151.57	11	-1.3	1152.58	72.09	33200000	1	47508	200716_dc_IP79_NormalLung-W6Ab_DDA-OTOT-HCD_25cmPepMap2uTT_145m_01.raw	2	2	O60239|3BP5_HUMAN				0
KPFDQTTISL	33.56	1148.61	10	-1.4	1149.61	69.03	324000000	1	45131	200716_dc_IP79_NormalLung-W6Ab_DDA-OTOT-HCD_25cmPepMap2uTT_145m_01.raw	2	2	Q15417|CNN3_HUMAN				1
VYRPKFLSK	33.55	1136.67	9	-0.5	379.897	39.85	2550000	1	24511	200716_dc_IP79_NormalLung-W6Ab_DDA-OTOT-HCD_25cmPepMap2uTT_145m_01.raw	1	1	Q14149|MORC3_HUMAN				0
AEDLNTRVA	33.55	987.499	9	-1	988.505	39.02	95600000	1	23898	200716_dc_IP79_NormalLung-W6Ab_DDA-OTOT-HCD_25cmPepMap2uTT_145m_01.raw	2	2	Q9Y3B3|TMED7_HUMAN				1
KTIAIGKVLK	33.55	1069.72	10	-1.2	357.581	36.62	8250000	1	22209	200716_dc_IP79_NormalLung-W6Ab_DDA-OTOT-HCD_25cmPepMap2uTT_145m_01.raw	2	2	Q8IYD1|ERF3B_HUMAN:P15170|ERF3A_HUMAN				0
IPFEKKPAL	33.55	1041.62	9	-1	521.818	47.27	18900000	1	29743	200716_dc_IP79_NormalLung-W6Ab_DDA-OTOT-HCD_25cmPepMap2uTT_145m_01.raw	1	1	Q99459|CDC5L_HUMAN				0
RSKNGFHLHLK	33.55	1335.75	11	-1.3	446.257	28.3	7030000	1	16300	200716_dc_IP79_NormalLung-W6Ab_DDA-OTOT-HCD_25cmPepMap2uTT_145m_01.raw	1	1	P13584|CP4B1_HUMAN				0
ASSRPGRPPK	33.55	1051.59	10	-1.8	351.536	16.93	9410000	1	8336	200716_dc_IP79_NormalLung-W6Ab_DDA-OTOT-HCD_25cmPepMap2uTT_145m_01.raw	1	1	Q9UI36|DACH1_HUMAN				0
C(+119.00)TAIREVSL	33.55	1109.52	9	-0.4	555.768	51.45	2500000	1	32772	200716_dc_IP79_NormalLung-W6Ab_DDA-OTOT-HCD_25cmPepMap2uTT_145m_01.raw	1	1	Q00536|CDK16_HUMAN:Q00537|CDK17_HUMAN:Q07002|CDK18_HUMAN	Cysteinylation	C1:Cysteinylation:1000.00		0
Q(-17.03)PLQHHNLL	33.54	1081.57	9	-0.6	541.79	57.13	2860000	1	36824	200716_dc_IP79_NormalLung-W6Ab_DDA-OTOT-HCD_25cmPepMap2uTT_145m_01.raw	1	1	P20039|2B1B_HUMAN:Q30134|2B18_HUMAN:Q5Y7A7|2B1D_HUMAN:P01912|2B13_HUMAN:Q95IE3|2B1C_HUMAN:P01911|2B1F_HUMAN:Q29974|2B1G_HUMAN:P04229|2B11_HUMAN:P79483|DRB3_HUMAN:P13760|2B14_HUMAN:Q30167|2B1A_HUMAN:Q9TQE0|2B19_HUMAN:P13762|DRB4_HUMAN:P13761|2B17_HUMAN	Pyro-glu from Q	Q1:Pyro-glu from Q:1000.00		0
TFGKKKGPNA	33.54	1046.59	10	-1.7	524.3	19.97	7770000	1	10477	200716_dc_IP79_NormalLung-W6Ab_DDA-OTOT-HCD_25cmPepMap2uTT_145m_01.raw	1	1	P62861|RS30_HUMAN				1
KVTGGAASK	33.54	817.466	9	-0.5	409.74	11.67	227000	1	4507	200716_dc_IP79_NormalLung-W6Ab_DDA-OTOT-HCD_25cmPepMap2uTT_145m_01.raw	1	1	P42766|RL35_HUMAN				0
TVKDVNQQEF	33.54	1206.59	10	-0.4	604.301	43.63	2290000	1	27237	200716_dc_IP79_NormalLung-W6Ab_DDA-OTOT-HCD_25cmPepMap2uTT_145m_01.raw	1	1	P39019|RS19_HUMAN				0
HYKQYPPNTSK	33.54	1361.67	11	-0.3	454.898	26.05	8660000	1	14467	200716_dc_IP79_NormalLung-W6Ab_DDA-OTOT-HCD_25cmPepMap2uTT_145m_01.raw	1	1	P43490|NAMPT_HUMAN				0
TC(+119.00)SPLRHSF	33.54	1165.5	9	-1.3	583.757	37.51	61900000	1	22732	200716_dc_IP79_NormalLung-W6Ab_DDA-OTOT-HCD_25cmPepMap2uTT_145m_01.raw	2	2	P35611|ADDA_HUMAN	Cysteinylation	C2:Cysteinylation:1000.00		0
AEAAAAPAAA	33.54	812.403	10	-1.1	813.409	35.09	0	1	21148	200716_dc_IP79_NormalLung-W6Ab_DDA-OTOT-HCD_25cmPepMap2uTT_145m_01.raw	0	0	P30049|ATPD_HUMAN				1
KPVKASKPK	33.53	981.633	9	0.4	491.824	11.53	1650000	1	4357	200716_dc_IP79_NormalLung-W6Ab_DDA-OTOT-HCD_25cmPepMap2uTT_145m_01.raw	1	1	P07305|H10_HUMAN				0
YFGKVGM(+15.99)K	33.53	944.479	8	-1.8	473.246	30.86	2880000	1	18154	200716_dc_IP79_NormalLung-W6Ab_DDA-OTOT-HCD_25cmPepMap2uTT_145m_01.raw	1	1	P46776|RL27A_HUMAN	Oxidation (M)	M7:Oxidation (M):1000.00		0
TGPVMPVR	33.52	855.464	8	-1	428.739	42.3	11100000	1	26205	200716_dc_IP79_NormalLung-W6Ab_DDA-OTOT-HCD_25cmPepMap2uTT_145m_01.raw	1	1	P26373|RL13_HUMAN				1
APYARPIFL	33.52	1046.59	9	-0.6	524.303	72.09	3420000	1	47298	200716_dc_IP79_NormalLung-W6Ab_DDA-OTOT-HCD_25cmPepMap2uTT_145m_01.raw	1	1	Q6PCB7|S27A1_HUMAN				1
AAAFGRIAF	33.52	922.502	9	-0.3	462.258	70.66	12900000	1	46298	200716_dc_IP79_NormalLung-W6Ab_DDA-OTOT-HCD_25cmPepMap2uTT_145m_01.raw	1	1	Q9HC38|GLOD4_HUMAN				1
KPKASLKIDL	33.52	1111.7	10	-2.2	556.854	41.52	14200000	1	25714	200716_dc_IP79_NormalLung-W6Ab_DDA-OTOT-HCD_25cmPepMap2uTT_145m_01.raw	1	1	P17948|VGFR1_HUMAN				0
NPRNFSDNQL	33.52	1203.56	10	-0.5	602.789	46.28	15900000	1	29114	200716_dc_IP79_NormalLung-W6Ab_DDA-OTOT-HCD_25cmPepMap2uTT_145m_01.raw	1	1	P37802|TAGL2_HUMAN				1
IPAAILHAF	33.52	951.554	9	-1.9	476.783	78.26	0	1	51601	200716_dc_IP79_NormalLung-W6Ab_DDA-OTOT-HCD_25cmPepMap2uTT_145m_01.raw	0	0	Q8TCY9|URGCP_HUMAN				1
APAGRKVGL	33.51	867.529	9	-0.1	434.772	29.24	50200000	1	16914	200716_dc_IP79_NormalLung-W6Ab_DDA-OTOT-HCD_25cmPepMap2uTT_145m_01.raw	1	1	P62917|RL8_HUMAN				1
APM(+15.99)SAAHQL	33.51	940.444	9	-0.7	471.229	30.96	3560000	1	18245	200716_dc_IP79_NormalLung-W6Ab_DDA-OTOT-HCD_25cmPepMap2uTT_145m_01.raw	1	1	P54259|ATN1_HUMAN	Oxidation (M)	M3:Oxidation (M):1000.00		0
PVTVTRTTITTTT	33.51	1390.77	13	-2.1	696.389	49.14	1600000	1	31182	200716_dc_IP79_NormalLung-W6Ab_DDA-OTOT-HCD_25cmPepMap2uTT_145m_01.raw	1	1	Q96S97|MYADM_HUMAN				1
KPSEAVPRKF	33.5	1157.66	10	0.4	386.893	30.91	10800000	1	18110	200716_dc_IP79_NormalLung-W6Ab_DDA-OTOT-HCD_25cmPepMap2uTT_145m_01.raw	1	1	Q9P266|JCAD_HUMAN				0
GPPGTGKTL	33.5	826.455	9	-0.6	414.234	33.05	27100000	1	19564	200716_dc_IP79_NormalLung-W6Ab_DDA-OTOT-HCD_25cmPepMap2uTT_145m_01.raw	1	1	Q96TA2|YMEL1_HUMAN:P62191|PRS4_HUMAN:P35998|PRS7_HUMAN:P62333|PRS10_HUMAN:P55072|TERA_HUMAN:P62195|PRS8_HUMAN:P17980|PRS6A_HUMAN:Q6PL18|ATAD2_HUMAN:Q13608|PEX6_HUMAN:Q5T2N8|ATD3C_HUMAN:Q5T9A4|ATD3B_HUMAN:Q8IYT4|KATL2_HUMAN:O75449|KTNA1_HUMAN:Q9NVI7|ATD3A_HUMAN:Q6PIW4|FIGL1_HUMAN:Q9Y4W6|AFG32_HUMAN:O43933|PEX1_HUMAN:Q9ULI0|ATD2B_HUMAN				1
GPPGTGKTI	33.5	826.455	9	-0.6	414.234	33.05	27100000	1	19564	200716_dc_IP79_NormalLung-W6Ab_DDA-OTOT-HCD_25cmPepMap2uTT_145m_01.raw	1	1	Q9BYK8|HELZ2_HUMAN				1
IPNKNRAEQL	33.49	1181.65	10	0.2	591.833	31.2	7720000	1	18352	200716_dc_IP79_NormalLung-W6Ab_DDA-OTOT-HCD_25cmPepMap2uTT_145m_01.raw	1	1	Q07157|ZO1_HUMAN				1
WFDQQNGR	33.49	1049.47	8	-1.5	525.74	46.58	57900000	1	29288	200716_dc_IP79_NormalLung-W6Ab_DDA-OTOT-HCD_25cmPepMap2uTT_145m_01.raw	2	2	Q92522|H1X_HUMAN				0
N(+.98)NSRIKLGLK	33.48	1142.68	10	0.3	381.9	38.78	2130000	1	23772	200716_dc_IP79_NormalLung-W6Ab_DDA-OTOT-HCD_25cmPepMap2uTT_145m_01.raw	1	1	P16403|H12_HUMAN:P10412|H14_HUMAN:P16402|H13_HUMAN:P16401|H15_HUMAN	Deamidation (NQ)	N1:Deamidation (NQ):12.28		0
N(+.98)NSRIKLGIK	33.48	1142.68	10	0.3	381.9	38.78	2130000	1	23772	200716_dc_IP79_NormalLung-W6Ab_DDA-OTOT-HCD_25cmPepMap2uTT_145m_01.raw	1	1	Q02539|H11_HUMAN	Deamidation (NQ)	N1:Deamidation (NQ):1000.00		0
HENESVYKA	33.47	1075.49	9	-1.6	538.753	27.67	12100000	1	15835	200716_dc_IP79_NormalLung-W6Ab_DDA-OTOT-HCD_25cmPepMap2uTT_145m_01.raw	1	1	P52292|IMA1_HUMAN				1
YLRSHKDEVVK	33.47	1372.75	11	-0.8	458.589	26.45	2810000	1	14966	200716_dc_IP79_NormalLung-W6Ab_DDA-OTOT-HCD_25cmPepMap2uTT_145m_01.raw	1	1	P46940|IQGA1_HUMAN				0
YPKRPLLGLVL	33.47	1267.8	11	-0.7	634.908	74.95	8870000	1	49185	200716_dc_IP79_NormalLung-W6Ab_DDA-OTOT-HCD_25cmPepMap2uTT_145m_01.raw	2	2	Q9GZR7|DDX24_HUMAN				0
FPWEVPKKL	33.46	1142.65	9	-0.9	381.89	68.98	2280000	1	45224	200716_dc_IP79_NormalLung-W6Ab_DDA-OTOT-HCD_25cmPepMap2uTT_145m_01.raw	1	1	P31153|METK2_HUMAN				1
FLKAVPSQKRT	33.46	1273.75	11	-1.3	425.59	30.67	5950000	1	17954	200716_dc_IP79_NormalLung-W6Ab_DDA-OTOT-HCD_25cmPepMap2uTT_145m_01.raw	1	1	P31949|S10AB_HUMAN				0
TESQLQEGKHVIG	33.45	1424.73	13	-0.2	713.37	39.27	9580000	1	24125	200716_dc_IP79_NormalLung-W6Ab_DDA-OTOT-HCD_25cmPepMap2uTT_145m_01.raw	2	2	Q01995|TAGL_HUMAN				1
TYSLGSALRP	33.45	1063.57	10	-0.8	532.79	61.72	687000000	1	40265	200716_dc_IP79_NormalLung-W6Ab_DDA-OTOT-HCD_25cmPepMap2uTT_145m_01.raw	3	3	P08670|VIME_HUMAN				1
SGKFNPIC(+119.00)K	33.44	1111.52	9	-1.5	556.764	31.75	10300000	1	18775	200716_dc_IP79_NormalLung-W6Ab_DDA-OTOT-HCD_25cmPepMap2uTT_145m_01.raw	2	2	Q02763|TIE2_HUMAN	Cysteinylation	C8:Cysteinylation:1000.00		0
EEAKRWM(+15.99)EA	33.43	1164.52	9	-1.6	583.268	31.5	14900000	1	18492	200716_dc_IP79_NormalLung-W6Ab_DDA-OTOT-HCD_25cmPepMap2uTT_145m_01.raw	1	1	P46940|IQGA1_HUMAN:Q86VI3|IQGA3_HUMAN	Oxidation (M)	M7:Oxidation (M):1000.00		0
TRDGQVINETSQ	33.42	1346.64	12	-2.3	674.327	35.34	11400000	1	21301	200716_dc_IP79_NormalLung-W6Ab_DDA-OTOT-HCD_25cmPepMap2uTT_145m_01.raw	1	1	P08670|VIME_HUMAN				1
TLKHEKPPQ	33.42	1076.6	9	-0.8	359.873	25.02	25500000	1	13889	200716_dc_IP79_NormalLung-W6Ab_DDA-OTOT-HCD_25cmPepMap2uTT_145m_01.raw	1	1	P30273|FCERG_HUMAN				1
GPKVGVEV	33.42	783.449	8	-0.6	392.732	42.6	28400000	1	26391	200716_dc_IP79_NormalLung-W6Ab_DDA-OTOT-HCD_25cmPepMap2uTT_145m_01.raw	1	1	Q09666|AHNK_HUMAN				0
NIKAPKISM(+15.99)	33.42	1016.57	9	-1.3	509.291	36.86	13400000	1	22507	200716_dc_IP79_NormalLung-W6Ab_DDA-OTOT-HCD_25cmPepMap2uTT_145m_01.raw	1	1	Q09666|AHNK_HUMAN	Oxidation (M)	M9:Oxidation (M):1000.00		0
EEVARFYAA	33.42	1054.51	9	-1.5	528.261	54.46	10100000	1	34892	200716_dc_IP79_NormalLung-W6Ab_DDA-OTOT-HCD_25cmPepMap2uTT_145m_01.raw	1	1	P14207|FOLR2_HUMAN:P15328|FOLR1_HUMAN				1
HDFRSPPP	33.4	951.456	8	-1.3	476.735	33.14	66800000	1	18874	200716_dc_IP79_NormalLung-W6Ab_DDA-OTOT-HCD_25cmPepMap2uTT_145m_01.raw	1	1	P23246|SFPQ_HUMAN				1
VEPDHFKVA	33.4	1040.53	9	-1.3	521.271	40.97	96000000	1	25235	200716_dc_IP79_NormalLung-W6Ab_DDA-OTOT-HCD_25cmPepMap2uTT_145m_01.raw	1	1	P17931|LEG3_HUMAN				1
KPRGSEGPVRSVF	33.4	1414.77	13	-1.5	472.596	37.94	4440000	1	23148	200716_dc_IP79_NormalLung-W6Ab_DDA-OTOT-HCD_25cmPepMap2uTT_145m_01.raw	1	1	Q14162|SREC_HUMAN				1
TVGVEPAADGKG	33.4	1099.55	12	-1.9	550.782	34.79	1490000	1	20917	200716_dc_IP79_NormalLung-W6Ab_DDA-OTOT-HCD_25cmPepMap2uTT_145m_01.raw	1	1	P46779|RL28_HUMAN				0
RPKPGGAGGKGM(+15.99)	33.39	1127.59	12	-0.8	376.869	14.65	404000	1	6542	200716_dc_IP79_NormalLung-W6Ab_DDA-OTOT-HCD_25cmPepMap2uTT_145m_01.raw	1	1	Q9BRD0|BUD13_HUMAN	Oxidation (M)	M12:Oxidation (M):1000.00		0
AEMTTRMVA	33.39	1008.47	9	-0.5	505.244	43.38	11700000	1	26998	200716_dc_IP79_NormalLung-W6Ab_DDA-OTOT-HCD_25cmPepMap2uTT_145m_01.raw	1	1	P40306|PSB10_HUMAN				1
ALKDLYC(+119.00)HK	33.38	1208.57	9	-0.2	403.863	34.7	7670000	1	20840	200716_dc_IP79_NormalLung-W6Ab_DDA-OTOT-HCD_25cmPepMap2uTT_145m_01.raw	1	1	P16220|CREB1_HUMAN	Cysteinylation	C7:Cysteinylation:1000.00		0
HRYRPGTVA	33.38	1055.56	9	-1.2	528.788	26.69	70200000	1	15136	200716_dc_IP79_NormalLung-W6Ab_DDA-OTOT-HCD_25cmPepMap2uTT_145m_01.raw	2	2	Q71DI3|H32_HUMAN:P68431|H31_HUMAN:Q16695|H31T_HUMAN:P84243|H33_HUMAN:Q6NXT2|H3C_HUMAN				1
SYPARVPPPPP	33.38	1176.63	11	-2.3	589.32	48.35	152000000	1	30790	200716_dc_IP79_NormalLung-W6Ab_DDA-OTOT-HCD_25cmPepMap2uTT_145m_01.raw	1	1	P07910|HNRPC_HUMAN				0
LPPLPKRPAL	33.38	1100.71	10	-2.2	367.909	55.9	106000000	1	36005	200716_dc_IP79_NormalLung-W6Ab_DDA-OTOT-HCD_25cmPepMap2uTT_145m_01.raw	2	2	Q9NR56|MBNL1_HUMAN				1
GLQFPVGR	33.38	872.487	8	-0.6	873.494	58.51	122000000	1	37676	200716_dc_IP79_NormalLung-W6Ab_DDA-OTOT-HCD_25cmPepMap2uTT_145m_01.raw	2	2	P20671|H2A1D_HUMAN:P04908|H2A1B_HUMAN:Q93077|H2A1C_HUMAN:Q7L7L0|H2A3_HUMAN:P0C0S8|H2A1_HUMAN:Q6FI13|H2A2A_HUMAN:P16104|H2AX_HUMAN:Q96KK5|H2A1H_HUMAN:Q99878|H2A1J_HUMAN:Q8IUE6|H2A2B_HUMAN:Q9BTM1|H2AJ_HUMAN:Q16777|H2A2C_HUMAN:P0C0S5|H2AZ_HUMAN:Q96QV6|H2A1A_HUMAN:Q71UI9|H2AV_HUMAN				1
RPAFPVKKL	33.37	1054.66	9	-0.9	352.562	37.89	9760000	1	23043	200716_dc_IP79_NormalLung-W6Ab_DDA-OTOT-HCD_25cmPepMap2uTT_145m_01.raw	1	1	Q13111|CAF1A_HUMAN				1
M(+15.99)TQQPRPVL	33.37	1084.57	9	-0.6	543.292	42.06	10700000	1	26031	200716_dc_IP79_NormalLung-W6Ab_DDA-OTOT-HCD_25cmPepMap2uTT_145m_01.raw	1	1	Q9NPE3|NOP10_HUMAN	Oxidation (M)	M1:Oxidation (M):1000.00		0
GKFMKPGKVVL	33.36	1202.72	11	-1.9	401.913	42.72	0	1	26558	200716_dc_IP79_NormalLung-W6Ab_DDA-OTOT-HCD_25cmPepMap2uTT_145m_01.raw	0	0	P61353|RL27_HUMAN				1
RPHHKILDM(+15.99)	33.35	1161.61	9	-0.8	388.209	26.35	6420000	1	14891	200716_dc_IP79_NormalLung-W6Ab_DDA-OTOT-HCD_25cmPepMap2uTT_145m_01.raw	1	1	Q08J23|NSUN2_HUMAN	Oxidation (M)	M9:Oxidation (M):1000.00		0
YSRKGFLFK	33.35	1144.64	9	0.2	382.554	41.12	7370000	1	25411	200716_dc_IP79_NormalLung-W6Ab_DDA-OTOT-HCD_25cmPepMap2uTT_145m_01.raw	1	1	O00267|SPT5H_HUMAN				1
YAAAQLRQY	33.35	1082.55	9	-1.4	542.282	48.06	3660000	1	30356	200716_dc_IP79_NormalLung-W6Ab_DDA-OTOT-HCD_25cmPepMap2uTT_145m_01.raw	1	1	O95926|SYF2_HUMAN				1
TEVLKTHGL	33.35	996.56	9	-1.9	499.286	39.75	6820000	1	24417	200716_dc_IP79_NormalLung-W6Ab_DDA-OTOT-HCD_25cmPepMap2uTT_145m_01.raw	1	1	P40429|RL13A_HUMAN				1
AGRAYHKYK	33.35	1092.58	9	0.1	365.202	14.89	10500000	1	6686	200716_dc_IP79_NormalLung-W6Ab_DDA-OTOT-HCD_25cmPepMap2uTT_145m_01.raw	2	2	P62917|RL8_HUMAN				0
TGHGKYEK	33.34	918.456	8	0	460.235	11.53	785000	1	4378	200716_dc_IP79_NormalLung-W6Ab_DDA-OTOT-HCD_25cmPepMap2uTT_145m_01.raw	2	2	P33241|LSP1_HUMAN				0
TEEDKTAVA	33.34	962.456	9	-1.7	482.234	28.3	138000000	1	16219	200716_dc_IP79_NormalLung-W6Ab_DDA-OTOT-HCD_25cmPepMap2uTT_145m_01.raw	2	2	Q8ND71|GIMA8_HUMAN				0
SPKKPVIVF	33.34	1013.63	9	-1.3	507.82	47.56	31800000	1	29969	200716_dc_IP79_NormalLung-W6Ab_DDA-OTOT-HCD_25cmPepMap2uTT_145m_01.raw	1	1	O75643|U520_HUMAN				1
AEYYRQQAA	33.34	1098.51	9	-0.8	550.261	34.6	1690000	1	20812	200716_dc_IP79_NormalLung-W6Ab_DDA-OTOT-HCD_25cmPepMap2uTT_145m_01.raw	1	1	Q96AE4|FUBP1_HUMAN:Q92945|FUBP2_HUMAN				1
SGGGYGGDR	33.33	824.341	9	-1.3	413.177	25.27	6660000	1	14087	200716_dc_IP79_NormalLung-W6Ab_DDA-OTOT-HCD_25cmPepMap2uTT_145m_01.raw	1	1	Q92804|RBP56_HUMAN				0
YPKKPKDEAF	33.33	1221.64	10	-0.7	611.827	32.23	16800000	1	19083	200716_dc_IP79_NormalLung-W6Ab_DDA-OTOT-HCD_25cmPepMap2uTT_145m_01.raw	2	2	P42226|STAT6_HUMAN				0
VYKDSFELK	33.32	1127.59	9	0	376.869	45.45	3970000	1	28512	200716_dc_IP79_NormalLung-W6Ab_DDA-OTOT-HCD_25cmPepMap2uTT_145m_01.raw	2	2	Q13619|CUL4A_HUMAN				1
RTTNLIRHF	33.32	1156.65	9	-0.8	386.556	36.81	6060000	1	22314	200716_dc_IP79_NormalLung-W6Ab_DDA-OTOT-HCD_25cmPepMap2uTT_145m_01.raw	1	1	Q14592|ZN460_HUMAN				1
EESSKIRAP	33.32	1015.53	9	-1	508.772	29.74	11300000	1	17279	200716_dc_IP79_NormalLung-W6Ab_DDA-OTOT-HCD_25cmPepMap2uTT_145m_01.raw	1	1	P08240|SRPRA_HUMAN				1
IPKKIFEKTAF	33.32	1320.78	11	-1.1	441.267	48.5	3200000	1	30690	200716_dc_IP79_NormalLung-W6Ab_DDA-OTOT-HCD_25cmPepMap2uTT_145m_01.raw	1	1	Q7Z4Q2|HEAT3_HUMAN				0
SEGGKTPVA	33.31	844.429	9	-0.8	423.221	27.38	47900000	1	15605	200716_dc_IP79_NormalLung-W6Ab_DDA-OTOT-HCD_25cmPepMap2uTT_145m_01.raw	2	2	Q70UQ0|IKIP_HUMAN				1
LPKEHAASL	33.31	964.534	9	-0.3	483.274	33.41	5130000	1	19932	200716_dc_IP79_NormalLung-W6Ab_DDA-OTOT-HCD_25cmPepMap2uTT_145m_01.raw	1	1	Q9H0A8|COMD4_HUMAN				1
LPVGRSVEETL	33.31	1198.66	11	-0.5	600.335	59.45	2860000	1	38440	200716_dc_IP79_NormalLung-W6Ab_DDA-OTOT-HCD_25cmPepMap2uTT_145m_01.raw	1	1	P30048|PRDX3_HUMAN				0
ASSPVLRQM	33.3	987.517	9	0.4	494.766	44.96	8750000	1	28125	200716_dc_IP79_NormalLung-W6Ab_DDA-OTOT-HCD_25cmPepMap2uTT_145m_01.raw	1	1	Q15788|NCOA1_HUMAN				1
TKGVGASGSF	33.3	909.456	10	-0.2	455.735	36.12	1690000	1	21917	200716_dc_IP79_NormalLung-W6Ab_DDA-OTOT-HCD_25cmPepMap2uTT_145m_01.raw	1	1	P07305|H10_HUMAN				0
KFKEFVQSV	33.3	1110.61	9	-2.2	556.31	49.14	7370000	1	31140	200716_dc_IP79_NormalLung-W6Ab_DDA-OTOT-HCD_25cmPepMap2uTT_145m_01.raw	1	1	P49703|ARL4D_HUMAN				0
RYNDLM(+15.99)KKK	33.3	1210.65	9	-1.4	404.556	18.7	18000000	1	9206	200716_dc_IP79_NormalLung-W6Ab_DDA-OTOT-HCD_25cmPepMap2uTT_145m_01.raw	1	1	O95347|SMC2_HUMAN	Oxidation (M)	M6:Oxidation (M):1000.00		0
VPKGLPAKLRVL	33.3	1289.85	12	-0.2	430.959	52.54	2160000	1	33621	200716_dc_IP79_NormalLung-W6Ab_DDA-OTOT-HCD_25cmPepMap2uTT_145m_01.raw	1	1	P08571|CD14_HUMAN				0
SEEIQKKRTR	33.28	1273.71	10	-1.1	425.577	15.28	640000	1	6989	200716_dc_IP79_NormalLung-W6Ab_DDA-OTOT-HCD_25cmPepMap2uTT_145m_01.raw	1	1	P83731|RL24_HUMAN				0
PAYFQRPENALK	33.28	1432.75	12	-1.4	478.589	49.58	2780000	1	31475	200716_dc_IP79_NormalLung-W6Ab_DDA-OTOT-HCD_25cmPepMap2uTT_145m_01.raw	1	1	Q14152|EIF3A_HUMAN				0
FVELGTQPATQ	33.27	1189.6	11	-0.2	595.806	63.98	4480000	1	41615	200716_dc_IP79_NormalLung-W6Ab_DDA-OTOT-HCD_25cmPepMap2uTT_145m_01.raw	1	1	P02652|APOA2_HUMAN				0
GC(+119.00)C(+119.00)TLKIEY	33.27	1266.48	9	-0.8	634.244	47.81	11800000	1	30176	200716_dc_IP79_NormalLung-W6Ab_DDA-OTOT-HCD_25cmPepMap2uTT_145m_01.raw	2	2	P14866|HNRPL_HUMAN:Q8WVV9|HNRLL_HUMAN	Cysteinylation	C2:Cysteinylation:1000.00;C3:Cysteinylation:1000.00		0
KLEVNEAELLR	33.26	1312.73	11	-1.1	438.585	57.37	4670000	1	36935	200716_dc_IP79_NormalLung-W6Ab_DDA-OTOT-HCD_25cmPepMap2uTT_145m_01.raw	2	2	Q6NZI2|CAVN1_HUMAN				0
RPYEKGRLI	33.26	1130.66	9	-1.3	377.892	32.53	0	1	19318	200716_dc_IP79_NormalLung-W6Ab_DDA-OTOT-HCD_25cmPepMap2uTT_145m_01.raw	0	0	P31689|DNJA1_HUMAN				1
APRWGNPRAL	33.25	1136.62	10	-0.8	379.88	45.56	3150000	1	28599	200716_dc_IP79_NormalLung-W6Ab_DDA-OTOT-HCD_25cmPepMap2uTT_145m_01.raw	1	1	P00973|OAS1_HUMAN				1
HFSRGSKS	33.25	904.452	8	-0.8	905.458	12.96	4590000	1	5393	200716_dc_IP79_NormalLung-W6Ab_DDA-OTOT-HCD_25cmPepMap2uTT_145m_01.raw	2	2	P39019|RS19_HUMAN				0
GSKGPLDQLEK	33.24	1170.62	11	-0.5	586.319	43.36	4590000	1	27020	200716_dc_IP79_NormalLung-W6Ab_DDA-OTOT-HCD_25cmPepMap2uTT_145m_01.raw	1	1	P05546|HEP2_HUMAN				0
SATGNSILGR	33.24	974.514	10	0.5	488.265	41.14	0	1	25439	200716_dc_IP79_NormalLung-W6Ab_DDA-OTOT-HCD_25cmPepMap2uTT_145m_01.raw	0	0	Q9NUV9|GIMA4_HUMAN:Q6P9H5|GIMA6_HUMAN				0
TPQPKKAAK	33.23	967.581	9	-0.3	484.798	12.77	1350000	1	5202	200716_dc_IP79_NormalLung-W6Ab_DDA-OTOT-HCD_25cmPepMap2uTT_145m_01.raw	1	1	P16402|H13_HUMAN				0
RFKTITTAYY	33.23	1262.67	10	-1	632.34	51.45	14800000	1	32756	200716_dc_IP79_NormalLung-W6Ab_DDA-OTOT-HCD_25cmPepMap2uTT_145m_01.raw	2	2	P51153|RAB13_HUMAN				0
SATGVTRYY	33.23	1016.49	9	-2.2	509.252	44.57	55400000	1	28169	200716_dc_IP79_NormalLung-W6Ab_DDA-OTOT-HCD_25cmPepMap2uTT_145m_01.raw	1	1	Q9NY47|CA2D2_HUMAN				0
ATRPAGQNL	33.23	926.493	9	-1.3	464.253	30.32	22100000	1	17773	200716_dc_IP79_NormalLung-W6Ab_DDA-OTOT-HCD_25cmPepMap2uTT_145m_01.raw	2	2	Q8WWQ0|PHIP_HUMAN				1
KVKAEVQNL	33.21	1027.6	9	0	514.808	32.47	2150000000	1	19557	200716_dc_IP79_NormalLung-W6Ab_DDA-OTOT-HCD_25cmPepMap2uTT_145m_01.raw	2	2	P35221|CTNA1_HUMAN:P26232|CTNA2_HUMAN				1
RPKIQQQF	33.21	1043.59	8	-0.7	522.801	35.14	29200000	1	21151	200716_dc_IP79_NormalLung-W6Ab_DDA-OTOT-HCD_25cmPepMap2uTT_145m_01.raw	1	1	O94906|PRP6_HUMAN				0
LPNVGKSSLINSL	33.21	1340.77	13	0.5	671.391	74.05	1250000	1	48641	200716_dc_IP79_NormalLung-W6Ab_DDA-OTOT-HCD_25cmPepMap2uTT_145m_01.raw	1	1	Q9NVN8|GNL3L_HUMAN				1
IPKSAVGTL	33.2	884.533	9	-1.2	443.273	46.97	32000000	1	29522	200716_dc_IP79_NormalLung-W6Ab_DDA-OTOT-HCD_25cmPepMap2uTT_145m_01.raw	2	2	P05556|ITB1_HUMAN				1
TIQNDIM(+15.99)LLQLS	33.2	1403.73	12	-1.1	702.873	98.57	106000000	1	66095	200716_dc_IP79_NormalLung-W6Ab_DDA-OTOT-HCD_25cmPepMap2uTT_145m_01.raw	1	1	P08311|CATG_HUMAN	Oxidation (M)	M7:Oxidation (M):1000.00		0
YASLHGRIY	33.2	1078.56	9	-2.5	360.525	43.43	14500000	1	27048	200716_dc_IP79_NormalLung-W6Ab_DDA-OTOT-HCD_25cmPepMap2uTT_145m_01.raw	2	2	Q9UHB6|LIMA1_HUMAN				1
AEMNGKLIA	33.2	945.495	9	-0.5	473.755	45.07	0	1	28245	200716_dc_IP79_NormalLung-W6Ab_DDA-OTOT-HCD_25cmPepMap2uTT_145m_01.raw	0	0	Q9Y6Y0|NS1BP_HUMAN				0
SVYAHFPINVVIQ	33.19	1485.8	13	-1	743.905	87.35	6240000	1	57961	200716_dc_IP79_NormalLung-W6Ab_DDA-OTOT-HCD_25cmPepMap2uTT_145m_01.raw	1	1	P32969|RL9_HUMAN				0
KTKGFHTTI	33.19	1031.58	9	-1.6	516.795	27.91	4620000	1	16031	200716_dc_IP79_NormalLung-W6Ab_DDA-OTOT-HCD_25cmPepMap2uTT_145m_01.raw	1	1	Q15417|CNN3_HUMAN				1
M(+15.99)PKVSGPDL	33.19	958.479	9	-1.4	480.246	44.62	16400000	1	27896	200716_dc_IP79_NormalLung-W6Ab_DDA-OTOT-HCD_25cmPepMap2uTT_145m_01.raw	2	2	Q09666|AHNK_HUMAN	Oxidation (M)	M1:Oxidation (M):1000.00		0
EEQHRAALA	33.19	1023.51	9	-1.8	512.761	26.54	7910000	1	15045	200716_dc_IP79_NormalLung-W6Ab_DDA-OTOT-HCD_25cmPepMap2uTT_145m_01.raw	1	1	Q15149|PLEC_HUMAN				0
EEEAAQKNM(+15.99)A	33.18	1135.48	10	-1.5	568.747	25.37	5760000	1	14150	200716_dc_IP79_NormalLung-W6Ab_DDA-OTOT-HCD_25cmPepMap2uTT_145m_01.raw	1	1	P35579|MYH9_HUMAN	Oxidation (M)	M9:Oxidation (M):1000.00		0
AIKENFQFK	33.17	1123.6	9	-0.6	562.808	45.65	3370000	1	28645	200716_dc_IP79_NormalLung-W6Ab_DDA-OTOT-HCD_25cmPepMap2uTT_145m_01.raw	1	1	Q460N5|PAR14_HUMAN				0
AAKPKVVKPK	33.17	1064.71	10	0.1	355.91	18.65	10800000	1	9551	200716_dc_IP79_NormalLung-W6Ab_DDA-OTOT-HCD_25cmPepMap2uTT_145m_01.raw	2	2	P16403|H12_HUMAN				1
AENPKLISA	33.17	941.518	9	-1.7	471.766	42.79	35300000	1	26514	200716_dc_IP79_NormalLung-W6Ab_DDA-OTOT-HCD_25cmPepMap2uTT_145m_01.raw	2	2	Q6P158|DHX57_HUMAN				1
LVFPSEIVGK	33.17	1087.63	10	-0.6	544.821	73.44	0	1	48202	200716_dc_IP79_NormalLung-W6Ab_DDA-OTOT-HCD_25cmPepMap2uTT_145m_01.raw	0	0	P62081|RS7_HUMAN				1
GPKPGGGPGL	33.17	835.455	10	-1.1	418.734	34.7	6000000	1	20833	200716_dc_IP79_NormalLung-W6Ab_DDA-OTOT-HCD_25cmPepMap2uTT_145m_01.raw	1	1	P23246|SFPQ_HUMAN				1
KVVEGSFVYK	33.16	1154.63	10	-1.5	578.323	43.19	1530000	1	26927	200716_dc_IP79_NormalLung-W6Ab_DDA-OTOT-HCD_25cmPepMap2uTT_145m_01.raw	1	1	P31150|GDIA_HUMAN				1
SGASVVAIR	33.15	858.492	9	-2.1	430.252	41.07	1130000	1	25442	200716_dc_IP79_NormalLung-W6Ab_DDA-OTOT-HCD_25cmPepMap2uTT_145m_01.raw	1	1	Q5SSJ5|HP1B3_HUMAN				1
VTASVRLSY	33.15	994.545	9	-0.5	498.279	54.11	6120000	1	34660	200716_dc_IP79_NormalLung-W6Ab_DDA-OTOT-HCD_25cmPepMap2uTT_145m_01.raw	1	1	P04275|VWF_HUMAN				1
GFVLYKYKLLPRS	33.15	1582.92	13	-1	528.648	64.91	0	1	42312	200716_dc_IP79_NormalLung-W6Ab_DDA-OTOT-HCD_25cmPepMap2uTT_145m_01.raw	0	0	P21397|AOFA_HUMAN				0
HFELGGDK	33.15	901.429	8	0.1	451.722	34.5	140000000	1	20938	200716_dc_IP79_NormalLung-W6Ab_DDA-OTOT-HCD_25cmPepMap2uTT_145m_01.raw	1	1	Q969Q0|RL36L_HUMAN:P83881|RL36A_HUMAN				1
NPRKHITSL	33.15	1064.61	9	-0.4	533.312	27.52	7810000	1	15724	200716_dc_IP79_NormalLung-W6Ab_DDA-OTOT-HCD_25cmPepMap2uTT_145m_01.raw	1	1	Q13888|TF2H2_HUMAN:Q6P1K8|T2H2L_HUMAN				1
KLKDTKSRPK	33.14	1199.73	10	-0.9	400.919	13.01	5780000	1	5412	200716_dc_IP79_NormalLung-W6Ab_DDA-OTOT-HCD_25cmPepMap2uTT_145m_01.raw	2	2	Q9GZR7|DDX24_HUMAN				1
HKYRPETK	33.14	1057.57	8	0.6	353.53	15.81	9220000	1	7338	200716_dc_IP79_NormalLung-W6Ab_DDA-OTOT-HCD_25cmPepMap2uTT_145m_01.raw	2	2	P62424|RL7A_HUMAN				0
SPLNTGKAL	33.14	899.508	9	-0.2	450.761	42.4	4800000	1	26342	200716_dc_IP79_NormalLung-W6Ab_DDA-OTOT-HCD_25cmPepMap2uTT_145m_01.raw	1	1	P12111|CO6A3_HUMAN				1
SEMKVVTA	33.13	863.442	8	-0.7	432.728	38.33	3270000	1	23420	200716_dc_IP79_NormalLung-W6Ab_DDA-OTOT-HCD_25cmPepMap2uTT_145m_01.raw	1	1	P13584|CP4B1_HUMAN				0
VLKGVHSHK	33.13	1003.59	9	-1.4	502.803	15.13	441000	1	6961	200716_dc_IP79_NormalLung-W6Ab_DDA-OTOT-HCD_25cmPepMap2uTT_145m_01.raw	1	1	P62750|RL23A_HUMAN				1
RTSPTFRRPK	33.13	1244.71	10	-1.7	415.91	26.25	28600000	1	14754	200716_dc_IP79_NormalLung-W6Ab_DDA-OTOT-HCD_25cmPepMap2uTT_145m_01.raw	1	1	P62750|RL23A_HUMAN				0
KPHWNDGAIL	33.13	1149.59	10	-1.3	575.803	52.19	3410000	1	33305	200716_dc_IP79_NormalLung-W6Ab_DDA-OTOT-HCD_25cmPepMap2uTT_145m_01.raw	1	1	P42229|STA5A_HUMAN:P51692|STA5B_HUMAN				1
MPLRGKQL	33.13	941.548	8	-1.5	471.781	33.81	3330000	1	20209	200716_dc_IP79_NormalLung-W6Ab_DDA-OTOT-HCD_25cmPepMap2uTT_145m_01.raw	1	1	Q15233|NONO_HUMAN				0
TPDTGRILSKL	33.12	1199.69	11	-0.6	600.851	56.73	1720000	1	36577	200716_dc_IP79_NormalLung-W6Ab_DDA-OTOT-HCD_25cmPepMap2uTT_145m_01.raw	1	1	P55036|PSMD4_HUMAN:A2A3N6|PIPSL_HUMAN				1
HLTPEEKSAV	33.12	1109.57	10	-1.6	555.792	31.7	1630000	1	18813	200716_dc_IP79_NormalLung-W6Ab_DDA-OTOT-HCD_25cmPepMap2uTT_145m_01.raw	1	1	P68871|HBB_HUMAN				1
AEQIKHILA	33.11	1021.59	9	-1.3	511.803	39.22	5890000	1	24041	200716_dc_IP79_NormalLung-W6Ab_DDA-OTOT-HCD_25cmPepMap2uTT_145m_01.raw	1	1	P13693|TCTP_HUMAN:Q56UQ5|TPT1L_HUMAN				1
KIGFFKRPLK	33.11	1232.78	10	-1.3	617.394	38.92	119000000	1	23830	200716_dc_IP79_NormalLung-W6Ab_DDA-OTOT-HCD_25cmPepMap2uTT_145m_01.raw	2	2	P56199|ITA1_HUMAN				1
RLKAQMIEK	33.11	1115.65	9	-1	372.89	29.09	57500000	1	16831	200716_dc_IP79_NormalLung-W6Ab_DDA-OTOT-HCD_25cmPepMap2uTT_145m_01.raw	2	2	Q13813|SPTN1_HUMAN				1
ATGPPVSELITKA	33.1	1282.71	13	-1.5	642.363	66.32	2030000	1	43370	200716_dc_IP79_NormalLung-W6Ab_DDA-OTOT-HCD_25cmPepMap2uTT_145m_01.raw	1	1	P16401|H15_HUMAN				0
TGNLGNVVHIER	33.1	1307.69	12	-1.8	436.905	48.35	2930000	1	30603	200716_dc_IP79_NormalLung-W6Ab_DDA-OTOT-HCD_25cmPepMap2uTT_145m_01.raw	1	1	Q6P5R6|RL22L_HUMAN				0
KIKEAADIIQK	33.1	1255.75	11	-0.9	419.59	34.94	8120000	1	21097	200716_dc_IP79_NormalLung-W6Ab_DDA-OTOT-HCD_25cmPepMap2uTT_145m_01.raw	1	1	O00471|EXOC5_HUMAN				0
NFFAKRDKK	33.1	1152.64	9	-1	385.22	25.86	11200000	1	14543	200716_dc_IP79_NormalLung-W6Ab_DDA-OTOT-HCD_25cmPepMap2uTT_145m_01.raw	1	1	Q9UKY7|CDV3_HUMAN				1
SNYNLPMHK	33.09	1102.52	9	-0.5	368.515	40.29	3260000	1	24825	200716_dc_IP79_NormalLung-W6Ab_DDA-OTOT-HCD_25cmPepMap2uTT_145m_01.raw	1	1	P36578|RL4_HUMAN				0
GQTPKVAKQEKK	33.09	1340.78	12	-1.2	447.933	15.42	2240000	1	6991	200716_dc_IP79_NormalLung-W6Ab_DDA-OTOT-HCD_25cmPepMap2uTT_145m_01.raw	1	1	P62861|RS30_HUMAN				0
VDDTQFVRF	33.08	1125.55	9	-1.6	563.779	72.58	5620000	1	47619	200716_dc_IP79_NormalLung-W6Ab_DDA-OTOT-HCD_25cmPepMap2uTT_145m_01.raw	1	1	Q29960|1C16_HUMAN:P30480|1B42_HUMAN:P01889|1B07_HUMAN:Q31610|1B81_HUMAN:P04222|1C03_HUMAN:P30460|1B08_HUMAN:P30486|1B48_HUMAN:Q29836|1B67_HUMAN:P30499|1C01_HUMAN:Q31612|1B73_HUMAN:Q95365|1B38_HUMAN:P30475|1B39_HUMAN:P30462|1B14_HUMAN:P30504|1C04_HUMAN:Q29963|1C06_HUMAN:Q29865|1C18_HUMAN:P30510|1C14_HUMAN:P30508|1C12_HUMAN:Q07000|1C15_HUMAN:P13747|HLAE_HUMAN:Q29718|1B82_HUMAN:P30455|1A36_HUMAN:P04…				1
QEDAARLQAA	33.08	1071.53	10	-0.3	536.773	36.91	8940000	1	22409	200716_dc_IP79_NormalLung-W6Ab_DDA-OTOT-HCD_25cmPepMap2uTT_145m_01.raw	1	1	Q01082|SPTB2_HUMAN				0
FATPVFITK	33.08	1022.58	9	-1.8	512.296	68.59	10100000	1	44854	200716_dc_IP79_NormalLung-W6Ab_DDA-OTOT-HCD_25cmPepMap2uTT_145m_01.raw	1	1	Q8IY34|S15A3_HUMAN				1
VVKVANVSL	33.08	927.575	9	-1	464.795	59.15	13500000	1	38168	200716_dc_IP79_NormalLung-W6Ab_DDA-OTOT-HCD_25cmPepMap2uTT_145m_01.raw	1	1	P62266|RS23_HUMAN				0
TVDDVIKEQNR	33.07	1315.67	11	-1.5	439.564	40.09	1740000	1	24728	200716_dc_IP79_NormalLung-W6Ab_DDA-OTOT-HCD_25cmPepMap2uTT_145m_01.raw	1	1	Q9UQN3|CHM2B_HUMAN				0
AEAFGKIVA	33.07	904.502	9	-1.3	453.258	53.57	22000000	1	34230	200716_dc_IP79_NormalLung-W6Ab_DDA-OTOT-HCD_25cmPepMap2uTT_145m_01.raw	1	1	Q13263|TIF1B_HUMAN				1
EEM(+15.99)PQVHTP	33.07	1082.47	9	-0.7	542.242	38.58	156000000	1	23756	200716_dc_IP79_NormalLung-W6Ab_DDA-OTOT-HCD_25cmPepMap2uTT_145m_01.raw	1	1	P25205|MCM3_HUMAN	Oxidation (M)	M3:Oxidation (M):1000.00		0
MPLLRQEEL	33.07	1127.6	9	-0.6	564.807	65.78	40500000	1	42827	200716_dc_IP79_NormalLung-W6Ab_DDA-OTOT-HCD_25cmPepMap2uTT_145m_01.raw	1	1	Q9NZN4|EHD2_HUMAN				1
VAM(+15.99)NPVEHPF	33.07	1155.54	10	-0.3	578.776	52.29	2340000	1	33442	200716_dc_IP79_NormalLung-W6Ab_DDA-OTOT-HCD_25cmPepMap2uTT_145m_01.raw	1	1	P62917|RL8_HUMAN	Oxidation (M)	M3:Oxidation (M):1000.00		0
EERVQIVSA	33.07	1029.55	9	-1.1	1030.55	46.53	45600000	1	29289	200716_dc_IP79_NormalLung-W6Ab_DDA-OTOT-HCD_25cmPepMap2uTT_145m_01.raw	2	2	Q9P2E3|ZNFX1_HUMAN				1
APSSPRPALP	33.06	991.545	10	-0.6	496.779	46.48	1640000	1	29266	200716_dc_IP79_NormalLung-W6Ab_DDA-OTOT-HCD_25cmPepMap2uTT_145m_01.raw	1	1	P05362|ICAM1_HUMAN				1
HGFREGTTP	33.05	1000.47	9	0.2	501.244	29.69	494000000	1	17284	200716_dc_IP79_NormalLung-W6Ab_DDA-OTOT-HCD_25cmPepMap2uTT_145m_01.raw	2	2	P61927|RL37_HUMAN				1
APKISMPDVDL	33.05	1184.61	11	-0.4	593.313	76.18	2430000	1	50095	200716_dc_IP79_NormalLung-W6Ab_DDA-OTOT-HCD_25cmPepMap2uTT_145m_01.raw	1	1	Q09666|AHNK_HUMAN				0
SEQHIPVSA	33.05	966.477	9	-0.2	484.246	40.49	118000000	1	24909	200716_dc_IP79_NormalLung-W6Ab_DDA-OTOT-HCD_25cmPepMap2uTT_145m_01.raw	1	1	Q9BZ29|DOCK9_HUMAN				1
KSSNLEGRTK	33.05	1118.6	10	0.3	373.875	15.08	3710000	1	6854	200716_dc_IP79_NormalLung-W6Ab_DDA-OTOT-HCD_25cmPepMap2uTT_145m_01.raw	2	2	A0A075B6R0|TRGV2_HUMAN:A0A0C4DH28|TRGV4_HUMAN:P03979|TRGV3_HUMAN:A0A0C4DH27|TRGV8_HUMAN				0
KVAGAATPK	33.04	841.502	9	-0.4	421.758	21.79	56300000	1	11558	200716_dc_IP79_NormalLung-W6Ab_DDA-OTOT-HCD_25cmPepMap2uTT_145m_01.raw	1	1	P16402|H13_HUMAN				1
SESGFHMVA	33.04	963.412	9	-1.1	964.418	50.33	14300000	1	31984	200716_dc_IP79_NormalLung-W6Ab_DDA-OTOT-HCD_25cmPepMap2uTT_145m_01.raw	1	1	Q96CX2|KCD12_HUMAN				0
EEIQKKLEAA	33.04	1157.63	10	-0.3	579.822	38.71	1720000	1	23740	200716_dc_IP79_NormalLung-W6Ab_DDA-OTOT-HCD_25cmPepMap2uTT_145m_01.raw	1	1	P16949|STMN1_HUMAN:Q93045|STMN2_HUMAN:Q9H169|STMN4_HUMAN				1
AERYDDM(+15.99)AA	33.04	1056.42	9	-0.8	529.216	31.06	148000000	1	18156	200716_dc_IP79_NormalLung-W6Ab_DDA-OTOT-HCD_25cmPepMap2uTT_145m_01.raw	2	2	P63104|1433Z_HUMAN:P31946|1433B_HUMAN:P61981|1433G_HUMAN	Oxidation (M)	M7:Oxidation (M):1000.00		0
TETQEKNPLP	33.04	1155.58	10	-1.6	578.795	40.93	12600000	1	25218	200716_dc_IP79_NormalLung-W6Ab_DDA-OTOT-HCD_25cmPepMap2uTT_145m_01.raw	1	1	P62328|TYB4_HUMAN				1
TGGGETEETLK	33.04	1120.52	11	-2.2	561.268	31.49	0	1	18576	200716_dc_IP79_NormalLung-W6Ab_DDA-OTOT-HCD_25cmPepMap2uTT_145m_01.raw	0	0	Q15063|POSTN_HUMAN				0
HPRAPVLL	33.04	901.55	8	-1.4	451.781	44.52	3810000	1	27837	200716_dc_IP79_NormalLung-W6Ab_DDA-OTOT-HCD_25cmPepMap2uTT_145m_01.raw	1	1	Q13685|AAMP_HUMAN				1
APYFLPEHIF	33.03	1232.62	10	-0.6	617.318	92.64	597000	1	61743	200716_dc_IP79_NormalLung-W6Ab_DDA-OTOT-HCD_25cmPepMap2uTT_145m_01.raw	1	1	Q14156|EFR3A_HUMAN				0
EELRDIPQA	33.03	1069.54	9	-1.1	1070.55	51.5	109000000	1	32796	200716_dc_IP79_NormalLung-W6Ab_DDA-OTOT-HCD_25cmPepMap2uTT_145m_01.raw	2	2	Q9Y4D1|DAAM1_HUMAN				1
RVKLPSGSKK	33.02	1098.69	10	-0.4	367.236	24.87	18100000	1	13636	200716_dc_IP79_NormalLung-W6Ab_DDA-OTOT-HCD_25cmPepMap2uTT_145m_01.raw	1	1	P62917|RL8_HUMAN				1
AIRKYIIHK	33.02	1140.71	9	-0.8	381.245	29.05	2330000	1	16850	200716_dc_IP79_NormalLung-W6Ab_DDA-OTOT-HCD_25cmPepMap2uTT_145m_01.raw	1	1	Q5SSJ5|HP1B3_HUMAN				0
EENVGLHVP	33.02	992.493	9	-0.5	497.253	56.14	37300000	1	36012	200716_dc_IP79_NormalLung-W6Ab_DDA-OTOT-HCD_25cmPepMap2uTT_145m_01.raw	1	1	O15013|ARHGA_HUMAN				0
HLYLRGGAGVGS	32.99	1185.63	12	-1.6	593.819	41.52	1830000	1	25734	200716_dc_IP79_NormalLung-W6Ab_DDA-OTOT-HCD_25cmPepMap2uTT_145m_01.raw	1	1	P39019|RS19_HUMAN				0
FPNIPGKSL	32.98	971.544	9	-1.5	486.779	62.91	39200000	1	41000	200716_dc_IP79_NormalLung-W6Ab_DDA-OTOT-HCD_25cmPepMap2uTT_145m_01.raw	1	1	O15121|DEGS1_HUMAN				1
AEDRPSEQL	32.97	1043.49	9	-1.1	522.751	38.38	13900000	1	23389	200716_dc_IP79_NormalLung-W6Ab_DDA-OTOT-HCD_25cmPepMap2uTT_145m_01.raw	1	1	Q8WUI4|HDAC7_HUMAN				1
SLPLVDTHSK	32.97	1095.59	10	-0.5	548.803	42.3	15000000	1	26184	200716_dc_IP79_NormalLung-W6Ab_DDA-OTOT-HCD_25cmPepMap2uTT_145m_01.raw	2	2	P08670|VIME_HUMAN				1
TVFSHAQT	32.96	889.429	8	-1.1	445.721	34.55	4320000	1	20767	200716_dc_IP79_NormalLung-W6Ab_DDA-OTOT-HCD_25cmPepMap2uTT_145m_01.raw	1	1	Q71UM5|RS27L_HUMAN:P42677|RS27_HUMAN				0
APKPGLPYGL	32.96	1011.58	10	-0.9	506.794	67.38	868000	1	44074	200716_dc_IP79_NormalLung-W6Ab_DDA-OTOT-HCD_25cmPepMap2uTT_145m_01.raw	1	1	Q6W2J9|BCOR_HUMAN				0
DGSFSVKPLK	32.96	1076.59	10	-2.5	539.299	46.25	0	1	29087	200716_dc_IP79_NormalLung-W6Ab_DDA-OTOT-HCD_25cmPepMap2uTT_145m_01.raw	0	0	O60291|MGRN1_HUMAN				1
FGGPGTASRP	32.96	945.467	10	-0.6	473.74	36.81	19800000	1	22297	200716_dc_IP79_NormalLung-W6Ab_DDA-OTOT-HCD_25cmPepMap2uTT_145m_01.raw	1	1	P08670|VIME_HUMAN				1
APRQPGLM(+15.99)A	32.95	955.491	9	-1.4	478.752	35.93	20900000	1	21675	200716_dc_IP79_NormalLung-W6Ab_DDA-OTOT-HCD_25cmPepMap2uTT_145m_01.raw	1	1	Q9Y6H1|CHCH2_HUMAN:Q5T1J5|CHCH9_HUMAN	Oxidation (M)	M8:Oxidation (M):1000.00		0
MPYDSNRVVL	32.95	1192.59	10	-0.5	597.303	63.68	4240000	1	41381	200716_dc_IP79_NormalLung-W6Ab_DDA-OTOT-HCD_25cmPepMap2uTT_145m_01.raw	1	1	Q9H3S7|PTN23_HUMAN				1
FGTFGGLGSK	32.95	969.492	10	-0.7	485.753	58.41	8990000	1	37617	200716_dc_IP79_NormalLung-W6Ab_DDA-OTOT-HCD_25cmPepMap2uTT_145m_01.raw	1	1	Q09666|AHNK_HUMAN				1
TGGKRKPYHK	32.95	1170.66	10	-0.3	391.228	10.94	8590000	1	3913	200716_dc_IP79_NormalLung-W6Ab_DDA-OTOT-HCD_25cmPepMap2uTT_145m_01.raw	2	2	P62241|RS8_HUMAN				0
WVKEKVVAL	32.94	1070.65	9	-0.5	536.331	51.35	17300000	1	32651	200716_dc_IP79_NormalLung-W6Ab_DDA-OTOT-HCD_25cmPepMap2uTT_145m_01.raw	1	1	P24001|IL32_HUMAN				1
AGFAGDDAPR	32.94	975.441	10	-0.8	488.727	38.73	1640000	1	23747	200716_dc_IP79_NormalLung-W6Ab_DDA-OTOT-HCD_25cmPepMap2uTT_145m_01.raw	1	1	P60709|ACTB_HUMAN:P63261|ACTG_HUMAN:P68032|ACTC_HUMAN:P62736|ACTA_HUMAN:P68133|ACTS_HUMAN:P63267|ACTH_HUMAN:A5A3E0|POTEF_HUMAN:Q6S8J3|POTEE_HUMAN:P0CG38|POTEI_HUMAN:P0CG39|POTEJ_HUMAN				1
SLGRM(+15.99)NQGTA	32.94	1049.49	10	-0.4	525.753	27.08	1630000	1	15425	200716_dc_IP79_NormalLung-W6Ab_DDA-OTOT-HCD_25cmPepMap2uTT_145m_01.raw	1	1	P43243|MATR3_HUMAN	Oxidation (M)	M5:Oxidation (M):1000.00		0
EEMKGIAAV	32.94	946.479	9	-0.7	474.247	49.78	9310000	1	31572	200716_dc_IP79_NormalLung-W6Ab_DDA-OTOT-HCD_25cmPepMap2uTT_145m_01.raw	1	1	Q13510|ASAH1_HUMAN				1
RVKGYLRLK	32.93	1131.72	9	-2	378.248	29.88	9420000	1	17408	200716_dc_IP79_NormalLung-W6Ab_DDA-OTOT-HCD_25cmPepMap2uTT_145m_01.raw	1	1	P46934|NEDD4_HUMAN				0
TAAAGGKKVK	32.93	929.566	10	-0.7	465.79	11.04	281000	1	4044	200716_dc_IP79_NormalLung-W6Ab_DDA-OTOT-HCD_25cmPepMap2uTT_145m_01.raw	1	1	Q92522|H1X_HUMAN				0
ATVTPSPVK	32.93	898.512	9	-0.6	450.263	33.61	4630000	1	20071	200716_dc_IP79_NormalLung-W6Ab_DDA-OTOT-HCD_25cmPepMap2uTT_145m_01.raw	1	1	Q9H1E3|NUCKS_HUMAN				1
GVHPPAPGV	32.93	829.445	9	-1.6	415.729	41.86	28200000	1	25955	200716_dc_IP79_NormalLung-W6Ab_DDA-OTOT-HCD_25cmPepMap2uTT_145m_01.raw	1	1	Q15428|SF3A2_HUMAN				1
KVKKPATAA	32.93	912.576	9	-0.9	457.295	15.76	13000000	1	7233	200716_dc_IP79_NormalLung-W6Ab_DDA-OTOT-HCD_25cmPepMap2uTT_145m_01.raw	1	1	P16402|H13_HUMAN				1
SGKPKVTKA	32.92	914.555	9	-0.1	458.285	13.54	1270000	1	5748	200716_dc_IP79_NormalLung-W6Ab_DDA-OTOT-HCD_25cmPepMap2uTT_145m_01.raw	1	1	P16402|H13_HUMAN				0
SLRKLC(+119.00)VFK	32.92	1211.65	9	-0.9	404.891	39.27	2360000	1	24117	200716_dc_IP79_NormalLung-W6Ab_DDA-OTOT-HCD_25cmPepMap2uTT_145m_01.raw	1	1	P13010|XRCC5_HUMAN	Cysteinylation	C6:Cysteinylation:1000.00		0
SISNPPGSNLRTT	32.92	1342.68	13	-1	672.349	44.08	5470000	1	27573	200716_dc_IP79_NormalLung-W6Ab_DDA-OTOT-HCD_25cmPepMap2uTT_145m_01.raw	1	1	Q9H4A3|WNK1_HUMAN				1
STHSASPNV	32.92	898.414	9	-0.6	450.214	27.52	12400000	1	15709	200716_dc_IP79_NormalLung-W6Ab_DDA-OTOT-HCD_25cmPepMap2uTT_145m_01.raw	1	1	Q8N1I0|DOCK4_HUMAN				0
HLQPPTAEEGR	32.92	1233.61	11	-1.5	617.811	33.81	2880000	1	20261	200716_dc_IP79_NormalLung-W6Ab_DDA-OTOT-HCD_25cmPepMap2uTT_145m_01.raw	1	1	Q99758|ABCA3_HUMAN				0
LAYLRLNTL	32.92	1075.64	9	-1.3	538.826	76.33	3100000	1	50180	200716_dc_IP79_NormalLung-W6Ab_DDA-OTOT-HCD_25cmPepMap2uTT_145m_01.raw	1	1	P06400|RB_HUMAN				1
SPQGRVMTI	32.91	987.517	9	-1	494.765	46.87	19000000	1	29467	200716_dc_IP79_NormalLung-W6Ab_DDA-OTOT-HCD_25cmPepMap2uTT_145m_01.raw	2	2	Q15365|PCBP1_HUMAN				1
AEGLMKVEA	32.91	946.479	9	-2	474.246	49.19	6600000	1	31152	200716_dc_IP79_NormalLung-W6Ab_DDA-OTOT-HCD_25cmPepMap2uTT_145m_01.raw	1	1	Q9HBR0|S38AA_HUMAN				1
SATGLARYY	32.9	1000.5	9	-0.1	501.256	53.23	5830000	1	34012	200716_dc_IP79_NormalLung-W6Ab_DDA-OTOT-HCD_25cmPepMap2uTT_145m_01.raw	1	1	P54289|CA2D1_HUMAN				1
SPRLPVGGF	32.9	928.513	9	-0.8	465.263	64.76	11300000	1	42208	200716_dc_IP79_NormalLung-W6Ab_DDA-OTOT-HCD_25cmPepMap2uTT_145m_01.raw	1	1	Q14669|TRIPC_HUMAN				1
SVFPFESGKPFK	32.89	1368.71	12	-0.6	457.243	67.11	10700000	1	43710	200716_dc_IP79_NormalLung-W6Ab_DDA-OTOT-HCD_25cmPepMap2uTT_145m_01.raw	1	1	P17931|LEG3_HUMAN				1
TTQIINITM(+15.99)TK	32.89	1278.69	11	-0.5	640.35	54.95	3680000	1	35336	200716_dc_IP79_NormalLung-W6Ab_DDA-OTOT-HCD_25cmPepMap2uTT_145m_01.raw	1	1	Q14980|NUMA1_HUMAN	Oxidation (M)	M9:Oxidation (M):1000.00		0
VSNFKPGVY	32.89	1009.52	9	-1.2	505.768	49.78	2260000	1	31646	200716_dc_IP79_NormalLung-W6Ab_DDA-OTOT-HCD_25cmPepMap2uTT_145m_01.raw	1	1	P63272|SPT4H_HUMAN				1
GSHFPGPFM(+15.99)	32.87	991.422	9	-0.6	992.429	61.67	0	1	40020	200716_dc_IP79_NormalLung-W6Ab_DDA-OTOT-HCD_25cmPepMap2uTT_145m_01.raw	0	0	Q16666|IF16_HUMAN	Oxidation (M)	M9:Oxidation (M):1000.00		0
TGPVM(+15.99)PVR	32.86	871.459	8	-1.1	436.736	32.13	21200000	1	18976	200716_dc_IP79_NormalLung-W6Ab_DDA-OTOT-HCD_25cmPepMap2uTT_145m_01.raw	1	1	P26373|RL13_HUMAN	Oxidation (M)	M5:Oxidation (M):1000.00		0
NALKHRPPK	32.86	1059.63	9	-1.2	354.217	18.11	8600000	1	9205	200716_dc_IP79_NormalLung-W6Ab_DDA-OTOT-HCD_25cmPepMap2uTT_145m_01.raw	2	2	Q6P2Q9|PRP8_HUMAN				0
IYDSLDYAKK	32.86	1214.62	10	-1.4	405.88	45.11	709000	1	28306	200716_dc_IP79_NormalLung-W6Ab_DDA-OTOT-HCD_25cmPepMap2uTT_145m_01.raw	1	1	P62847|RS24_HUMAN				1
KTQEISKGK	32.85	1017.58	9	-0.5	509.798	12.31	2010000	1	4910	200716_dc_IP79_NormalLung-W6Ab_DDA-OTOT-HCD_25cmPepMap2uTT_145m_01.raw	1	1	O75920|SERF1_HUMAN				0
ASGEAKPKVKK	32.85	1141.68	11	0	381.568	12.91	330000	1	5368	200716_dc_IP79_NormalLung-W6Ab_DDA-OTOT-HCD_25cmPepMap2uTT_145m_01.raw	1	1	P16403|H12_HUMAN				0
EEEREFYNA	32.84	1185.49	9	-0.4	593.754	47.22	3670000	1	29724	200716_dc_IP79_NormalLung-W6Ab_DDA-OTOT-HCD_25cmPepMap2uTT_145m_01.raw	1	1	Q8TAD8|SNIP1_HUMAN				0
AEEDLAQQRA	32.84	1129.54	10	-1	565.775	36.07	930000	1	21856	200716_dc_IP79_NormalLung-W6Ab_DDA-OTOT-HCD_25cmPepMap2uTT_145m_01.raw	1	1	Q15149|PLEC_HUMAN				1
SFLDISRPKM(+15.99)	32.83	1208.62	10	-0.3	605.318	55.3	35600000	1	35456	200716_dc_IP79_NormalLung-W6Ab_DDA-OTOT-HCD_25cmPepMap2uTT_145m_01.raw	2	2	Q16531|DDB1_HUMAN	Oxidation (M)	M10:Oxidation (M):1000.00		0
AEEAKSAIA	32.83	888.455	9	-1.2	445.234	29.1	18800000	1	16833	200716_dc_IP79_NormalLung-W6Ab_DDA-OTOT-HCD_25cmPepMap2uTT_145m_01.raw	1	1	P35241|RADI_HUMAN				1
VATM(+15.99)RSVNY	32.83	1055.51	9	0.8	528.761	35.68	6260000	1	21539	200716_dc_IP79_NormalLung-W6Ab_DDA-OTOT-HCD_25cmPepMap2uTT_145m_01.raw	1	1	P83436|COG7_HUMAN	Oxidation (M)	M4:Oxidation (M):1000.00		0
STGGKAPR	32.83	772.419	8	-0.6	387.217	12.01	17200000	1	4641	200716_dc_IP79_NormalLung-W6Ab_DDA-OTOT-HCD_25cmPepMap2uTT_145m_01.raw	2	2	Q71DI3|H32_HUMAN:P68431|H31_HUMAN:Q16695|H31T_HUMAN:P84243|H33_HUMAN:Q6NXT2|H3C_HUMAN				0
FVLGHFILL	32.83	1057.63	9	-0.8	529.823	103.01	34600000	1	69305	200716_dc_IP79_NormalLung-W6Ab_DDA-OTOT-HCD_25cmPepMap2uTT_145m_01.raw	2	2	P21980|TGM2_HUMAN				1
HPPPHLKTQL	32.83	1166.66	10	-0.2	389.892	31.99	7300000	1	18849	200716_dc_IP79_NormalLung-W6Ab_DDA-OTOT-HCD_25cmPepMap2uTT_145m_01.raw	1	1	Q9NR56|MBNL1_HUMAN:Q9NUK0|MBNL3_HUMAN				1
YAAIRDNYF	32.82	1131.53	9	-1.4	566.774	64.52	47200000	1	41948	200716_dc_IP79_NormalLung-W6Ab_DDA-OTOT-HCD_25cmPepMap2uTT_145m_01.raw	1	1	P11234|RALB_HUMAN:P11233|RALA_HUMAN				1
TVYGLPRQ	32.81	932.508	8	-1.3	467.261	47.76	63700000	1	30096	200716_dc_IP79_NormalLung-W6Ab_DDA-OTOT-HCD_25cmPepMap2uTT_145m_01.raw	2	2	P51911|CNN1_HUMAN				0
HEM(+15.99)TKTASA	32.81	990.444	9	0.2	496.229	13.26	10400000	1	5543	200716_dc_IP79_NormalLung-W6Ab_DDA-OTOT-HCD_25cmPepMap2uTT_145m_01.raw	1	1	Q9Y5U8|MPC1_HUMAN	Oxidation (M)	M3:Oxidation (M):1000.00		0
YPQKIKAEL	32.81	1088.62	9	-0.5	545.318	43.13	89200000	1	26791	200716_dc_IP79_NormalLung-W6Ab_DDA-OTOT-HCD_25cmPepMap2uTT_145m_01.raw	2	2	Q8WYP3|RIN2_HUMAN				1
FSVTRPLSY	32.8	1068.56	9	-0.3	535.287	67.11	1460000	1	43881	200716_dc_IP79_NormalLung-W6Ab_DDA-OTOT-HCD_25cmPepMap2uTT_145m_01.raw	1	1	P11229|ACM1_HUMAN				0
TPRIPKIYTK	32.8	1215.73	10	-1.4	406.251	41.32	8530000	1	25424	200716_dc_IP79_NormalLung-W6Ab_DDA-OTOT-HCD_25cmPepMap2uTT_145m_01.raw	1	1	Q96EY8|MMAB_HUMAN				0
ASSPVLRQM(+15.99)	32.79	1003.51	9	-0.8	502.763	34.49	19000000	1	20868	200716_dc_IP79_NormalLung-W6Ab_DDA-OTOT-HCD_25cmPepMap2uTT_145m_01.raw	1	1	Q15788|NCOA1_HUMAN	Oxidation (M)	M9:Oxidation (M):1000.00		0
LPRNEADEL	32.79	1055.52	9	-0.9	1056.53	45.65	48400000	1	28660	200716_dc_IP79_NormalLung-W6Ab_DDA-OTOT-HCD_25cmPepMap2uTT_145m_01.raw	2	2	O14791|APOL1_HUMAN				1
REGAPGPAA	32.79	824.414	9	-0.6	413.214	27.96	61200000	1	15979	200716_dc_IP79_NormalLung-W6Ab_DDA-OTOT-HCD_25cmPepMap2uTT_145m_01.raw	2	2	Q9Y5W3|KLF2_HUMAN				1
VPRAVLVDL	32.79	980.602	9	-0.3	491.308	69.68	5690000	1	45629	200716_dc_IP79_NormalLung-W6Ab_DDA-OTOT-HCD_25cmPepMap2uTT_145m_01.raw	1	1	P68371|TBB4B_HUMAN:P04350|TBB4A_HUMAN:Q3ZCM7|TBB8_HUMAN:A6NNZ2|TBB8L_HUMAN:Q9H4B7|TBB1_HUMAN				1
ILTERGYSF	32.79	1084.56	9	-1.1	543.284	63.05	2020000000	1	40834	200716_dc_IP79_NormalLung-W6Ab_DDA-OTOT-HCD_25cmPepMap2uTT_145m_01.raw	2	2	P60709|ACTB_HUMAN:P63261|ACTG_HUMAN:P68032|ACTC_HUMAN:P62736|ACTA_HUMAN:P68133|ACTS_HUMAN:P63267|ACTH_HUMAN				1
SPDSRASSL	32.79	918.441	9	-0.7	460.227	32.33	1560000	1	19193	200716_dc_IP79_NormalLung-W6Ab_DDA-OTOT-HCD_25cmPepMap2uTT_145m_01.raw	1	1	Q9UHB6|LIMA1_HUMAN				1
KFKFPGRQK	32.78	1134.67	9	0.4	379.229	28.5	542000000	1	16273	200716_dc_IP79_NormalLung-W6Ab_DDA-OTOT-HCD_25cmPepMap2uTT_145m_01.raw	2	2	P27635|RL10_HUMAN:Q96L21|RL10L_HUMAN				1
GTAAKSITK	32.77	875.508	9	-0.7	438.761	18.7	388000	1	9417	200716_dc_IP79_NormalLung-W6Ab_DDA-OTOT-HCD_25cmPepMap2uTT_145m_01.raw	1	1	Q9NUV9|GIMA4_HUMAN				1
HGLYEKKK	32.76	1001.57	8	-0.9	501.79	14.03	524000	1	6151	200716_dc_IP79_NormalLung-W6Ab_DDA-OTOT-HCD_25cmPepMap2uTT_145m_01.raw	1	1	P62847|RS24_HUMAN				0
SIKRPSPAEK	32.76	1111.63	10	-2.4	371.551	25.61	13900000	1	14331	200716_dc_IP79_NormalLung-W6Ab_DDA-OTOT-HCD_25cmPepMap2uTT_145m_01.raw	1	1	Q9HC35|EMAL4_HUMAN				1
KVVHFLGRVK	32.76	1181.74	10	-1	394.92	31.84	822000	1	18886	200716_dc_IP79_NormalLung-W6Ab_DDA-OTOT-HCD_25cmPepMap2uTT_145m_01.raw	1	1	P46976|GLYG_HUMAN				0
RPYGRRPQY	32.75	1191.63	9	-0.3	398.216	27.67	16200000	1	15837	200716_dc_IP79_NormalLung-W6Ab_DDA-OTOT-HCD_25cmPepMap2uTT_145m_01.raw	1	1	P67809|YBOX1_HUMAN				1
RPEEGRPVV	32.75	1037.56	9	-0.8	519.788	30.32	15500000	1	17704	200716_dc_IP79_NormalLung-W6Ab_DDA-OTOT-HCD_25cmPepMap2uTT_145m_01.raw	1	1	P27816|MAP4_HUMAN				1
AVYKVPPFTFHVK	32.74	1531.86	13	-2.6	511.624	63.13	0	1	41056	200716_dc_IP79_NormalLung-W6Ab_DDA-OTOT-HCD_25cmPepMap2uTT_145m_01.raw	0	0	Q6NZI2|CAVN1_HUMAN				0
VPHGHITSL	32.74	959.519	9	-1.6	480.766	36.62	13700000	1	22163	200716_dc_IP79_NormalLung-W6Ab_DDA-OTOT-HCD_25cmPepMap2uTT_145m_01.raw	1	1	Q9BSU3|NAA11_HUMAN:P41227|NAA10_HUMAN				1
SFLDISRPKM	32.72	1192.63	10	-2	398.549	64.72	4600000	1	42156	200716_dc_IP79_NormalLung-W6Ab_DDA-OTOT-HCD_25cmPepMap2uTT_145m_01.raw	1	1	Q16531|DDB1_HUMAN				1
TNTSAPDLKN	32.72	1059.52	10	-1.1	530.766	32.52	10800000	1	19283	200716_dc_IP79_NormalLung-W6Ab_DDA-OTOT-HCD_25cmPepMap2uTT_145m_01.raw	1	1	P27816|MAP4_HUMAN				0
YPKQSFTM(+15.99)V	32.72	1115.53	9	0.6	558.774	49.68	3010000	1	31480	200716_dc_IP79_NormalLung-W6Ab_DDA-OTOT-HCD_25cmPepMap2uTT_145m_01.raw	1	1	Q14847|LASP1_HUMAN	Oxidation (M)	M8:Oxidation (M):1000.00		0
AEGIKSNPS	32.71	901.451	9	-1.8	451.732	27.43	8630000	1	15673	200716_dc_IP79_NormalLung-W6Ab_DDA-OTOT-HCD_25cmPepMap2uTT_145m_01.raw	1	1	P35869|AHR_HUMAN				1
QPHADRRREIL	32.71	1389.76	11	-1	464.26	28.5	47700000	1	16418	200716_dc_IP79_NormalLung-W6Ab_DDA-OTOT-HCD_25cmPepMap2uTT_145m_01.raw	1	1	O15121|DEGS1_HUMAN				0
YLKVKGNVF	32.71	1066.62	9	-0.5	534.316	48.79	3170000	1	30877	200716_dc_IP79_NormalLung-W6Ab_DDA-OTOT-HCD_25cmPepMap2uTT_145m_01.raw	1	1	P84098|RL19_HUMAN				1
FANIVVREF	32.7	1093.59	9	-1.6	547.802	73.86	2530000	1	48532	200716_dc_IP79_NormalLung-W6Ab_DDA-OTOT-HCD_25cmPepMap2uTT_145m_01.raw	1	1	O00501|CLD5_HUMAN				0
HSVTLPSSK	32.69	954.513	9	-1	478.264	30.03	3630000	1	17526	200716_dc_IP79_NormalLung-W6Ab_DDA-OTOT-HCD_25cmPepMap2uTT_145m_01.raw	1	1	Q07352|TISB_HUMAN				0
RVKSPGSGHVK	32.68	1150.66	11	-1.5	384.559	16.29	2140000	1	7607	200716_dc_IP79_NormalLung-W6Ab_DDA-OTOT-HCD_25cmPepMap2uTT_145m_01.raw	1	1	Q9C040|TRIM2_HUMAN				1
HSQENRITK	32.68	1111.57	9	-0.2	371.532	16.48	4130000	1	7797	200716_dc_IP79_NormalLung-W6Ab_DDA-OTOT-HCD_25cmPepMap2uTT_145m_01.raw	1	1	Q9C0D5|TANC1_HUMAN				0
LPQRVLEQHKL	32.68	1359.8	11	-1.5	454.273	41.07	52700000	1	25301	200716_dc_IP79_NormalLung-W6Ab_DDA-OTOT-HCD_25cmPepMap2uTT_145m_01.raw	2	2	P26038|MOES_HUMAN:P35241|RADI_HUMAN				0
TGAATPKK	32.67	772.444	8	0	387.229	12.91	5980000	1	5191	200716_dc_IP79_NormalLung-W6Ab_DDA-OTOT-HCD_25cmPepMap2uTT_145m_01.raw	2	2	P10412|H14_HUMAN				0
SIKKTPKKVK	32.67	1155.77	10	0.4	386.264	13.25	1310000	1	5585	200716_dc_IP79_NormalLung-W6Ab_DDA-OTOT-HCD_25cmPepMap2uTT_145m_01.raw	1	1	P16402|H13_HUMAN				0
IYKSVLQAV	32.67	1019.6	9	-0.4	510.808	56.58	3690000	1	36414	200716_dc_IP79_NormalLung-W6Ab_DDA-OTOT-HCD_25cmPepMap2uTT_145m_01.raw	1	1	Q16799|RTN1_HUMAN				0
IYKSVIQAV	32.67	1019.6	9	-0.4	510.808	56.58	3690000	1	36414	200716_dc_IP79_NormalLung-W6Ab_DDA-OTOT-HCD_25cmPepMap2uTT_145m_01.raw	1	1	O95197|RTN3_HUMAN				0
VPFSVPKIPL	32.66	1095.67	10	-1	548.841	87.64	1210000	1	58128	200716_dc_IP79_NormalLung-W6Ab_DDA-OTOT-HCD_25cmPepMap2uTT_145m_01.raw	1	1	P80217|IN35_HUMAN				1
TDQVM(+15.99)QNPRVL	32.66	1315.66	11	-2.2	658.834	45.8	3750000	1	28780	200716_dc_IP79_NormalLung-W6Ab_DDA-OTOT-HCD_25cmPepMap2uTT_145m_01.raw	1	1	Q99733|NP1L4_HUMAN	Oxidation (M)	M5:Oxidation (M):1000.00		0
KPKATKEQL	32.65	1041.62	9	-1.1	521.816	22.75	11100000	1	12101	200716_dc_IP79_NormalLung-W6Ab_DDA-OTOT-HCD_25cmPepMap2uTT_145m_01.raw	1	1	P02768|ALBU_HUMAN				0
M(+15.99)SSPLSKEL	32.65	1006.5	9	-0.3	504.257	47.81	7900000	1	30082	200716_dc_IP79_NormalLung-W6Ab_DDA-OTOT-HCD_25cmPepMap2uTT_145m_01.raw	1	1	P61254|RL26_HUMAN:Q9UNX3|RL26L_HUMAN	Oxidation (M)	M1:Oxidation (M):1000.00		0
SEKEATPVV	32.64	958.497	9	-0.7	480.255	36.12	40900000	1	21807	200716_dc_IP79_NormalLung-W6Ab_DDA-OTOT-HCD_25cmPepMap2uTT_145m_01.raw	2	2	Q9Y520|PRC2C_HUMAN				1
GEARPGPTA	32.64	854.425	9	-0.6	428.219	28.21	62300000	1	16258	200716_dc_IP79_NormalLung-W6Ab_DDA-OTOT-HCD_25cmPepMap2uTT_145m_01.raw	2	2	Q13501|SQSTM_HUMAN				1
TVKVHVVAL	32.64	964.607	9	-1.3	483.31	47.02	24400000	1	29608	200716_dc_IP79_NormalLung-W6Ab_DDA-OTOT-HCD_25cmPepMap2uTT_145m_01.raw	1	1	Q9BSB4|ATGA1_HUMAN				1
Q(-17.03)PAPPREAHF	32.64	1131.55	10	-0.9	566.78	53.67	5990000	1	34352	200716_dc_IP79_NormalLung-W6Ab_DDA-OTOT-HCD_25cmPepMap2uTT_145m_01.raw	2	2	P46778|RL21_HUMAN	Pyro-glu from Q	Q1:Pyro-glu from Q:1000.00		0
SGNFGGSR	32.63	780.351	8	-2.1	391.182	26.3	7350000	1	14846	200716_dc_IP79_NormalLung-W6Ab_DDA-OTOT-HCD_25cmPepMap2uTT_145m_01.raw	1	1	P22626|ROA2_HUMAN				1
STRIPKIQK	32.63	1069.66	9	0.3	357.561	29.54	25500000	1	16925	200716_dc_IP79_NormalLung-W6Ab_DDA-OTOT-HCD_25cmPepMap2uTT_145m_01.raw	1	1	P11142|HSP7C_HUMAN:P54652|HSP72_HUMAN				1
APAPIHNQF	32.62	993.503	9	-1.3	497.758	44.86	29400000	1	28097	200716_dc_IP79_NormalLung-W6Ab_DDA-OTOT-HCD_25cmPepMap2uTT_145m_01.raw	1	1	Q15011|HERP1_HUMAN				1
GIAEFPSRGK	32.62	1060.57	10	-0.1	354.529	39.27	11900000	1	24094	200716_dc_IP79_NormalLung-W6Ab_DDA-OTOT-HCD_25cmPepMap2uTT_145m_01.raw	2	2	P02671|FIBA_HUMAN				1
KPKKGIQFL	32.61	1057.66	9	-1.1	529.839	36.52	4440000	1	22137	200716_dc_IP79_NormalLung-W6Ab_DDA-OTOT-HCD_25cmPepMap2uTT_145m_01.raw	1	1	Q92538|GBF1_HUMAN				0
TIVIRRDYLHY	32.61	1447.79	11	-1	483.605	55.64	11300000	1	35708	200716_dc_IP79_NormalLung-W6Ab_DDA-OTOT-HCD_25cmPepMap2uTT_145m_01.raw	1	1	P62280|RS11_HUMAN				0
SPKGKFSLF	32.61	1009.56	9	-2.5	1010.56	54.28	235000000	1	34789	200716_dc_IP79_NormalLung-W6Ab_DDA-OTOT-HCD_25cmPepMap2uTT_145m_01.raw	1	1	Q09666|AHNK_HUMAN				1
APRKPDWDL	32.61	1096.57	9	-0.9	549.29	48	21900000	1	30267	200716_dc_IP79_NormalLung-W6Ab_DDA-OTOT-HCD_25cmPepMap2uTT_145m_01.raw	1	1	Q8WUD4|CCD12_HUMAN				1
AFQERLNSY	32.61	1126.54	9	-1.1	564.277	51.5	8800000	1	32768	200716_dc_IP79_NormalLung-W6Ab_DDA-OTOT-HCD_25cmPepMap2uTT_145m_01.raw	1	1	O75694|NU155_HUMAN				1
RYFALVERRL	32.6	1321.76	10	-1.6	441.594	53.72	6400000	1	34376	200716_dc_IP79_NormalLung-W6Ab_DDA-OTOT-HCD_25cmPepMap2uTT_145m_01.raw	1	1	Q9UID3|VPS51_HUMAN				1
TVPKTEIREK	32.6	1199.69	10	-2.3	400.902	26.98	7250000	1	15341	200716_dc_IP79_NormalLung-W6Ab_DDA-OTOT-HCD_25cmPepMap2uTT_145m_01.raw	1	1	P62847|RS24_HUMAN				0
RVQEAVESMVK	32.59	1274.67	11	-1.2	638.339	45.6	1880000	1	28649	200716_dc_IP79_NormalLung-W6Ab_DDA-OTOT-HCD_25cmPepMap2uTT_145m_01.raw	1	1	Q96C01|F136A_HUMAN				1
YDRDPEGKVQP	32.59	1302.62	11	0.1	435.214	35.78	4310000	1	21626	200716_dc_IP79_NormalLung-W6Ab_DDA-OTOT-HCD_25cmPepMap2uTT_145m_01.raw	1	1	P52943|CRIP2_HUMAN				0
KGIPQRAPPK	32.58	1090.66	10	-0.5	364.561	25.91	11000000	1	14572	200716_dc_IP79_NormalLung-W6Ab_DDA-OTOT-HCD_25cmPepMap2uTT_145m_01.raw	1	1	Q96MG8|PCMD1_HUMAN				0
RSYHLQIVTK	32.58	1243.7	10	-1.1	415.575	38.09	5460000	1	23313	200716_dc_IP79_NormalLung-W6Ab_DDA-OTOT-HCD_25cmPepMap2uTT_145m_01.raw	1	1	P14902|I23O1_HUMAN				1
KVVDPFSK	32.58	918.518	8	-1.4	460.265	40.63	7060000	1	25085	200716_dc_IP79_NormalLung-W6Ab_DDA-OTOT-HCD_25cmPepMap2uTT_145m_01.raw	1	1	P61247|RS3A_HUMAN				0
TQVYKPPALK	32.58	1143.67	10	-1.2	382.228	41.96	20800000	1	25839	200716_dc_IP79_NormalLung-W6Ab_DDA-OTOT-HCD_25cmPepMap2uTT_145m_01.raw	2	2	Q96GY0|ZC21A_HUMAN				0
AGNFYVPAEPK	32.58	1191.59	11	-0.9	596.803	55.74	2020000	1	35888	200716_dc_IP79_NormalLung-W6Ab_DDA-OTOT-HCD_25cmPepMap2uTT_145m_01.raw	1	1	P18124|RL7_HUMAN				0
NYIEFTRILK	32.58	1295.72	10	0.4	648.869	70.08	0	1	45972	200716_dc_IP79_NormalLung-W6Ab_DDA-OTOT-HCD_25cmPepMap2uTT_145m_01.raw	0	0	P19105|ML12A_HUMAN:O14950|ML12B_HUMAN				1
SLAALKKALAA	32.58	1055.67	11	-0.8	528.842	54.46	1590000	1	34979	200716_dc_IP79_NormalLung-W6Ab_DDA-OTOT-HCD_25cmPepMap2uTT_145m_01.raw	1	1	P16403|H12_HUMAN:P10412|H14_HUMAN:P16402|H13_HUMAN:P16401|H15_HUMAN:Q02539|H11_HUMAN				1
[truncated: 6,134 more rows]

## Sheet: normal79_original
Peptide	-10lgP	Mass	Length	ppm	m/z	RT	Area Sample 1	Fraction	Scan	Source File	#Feature	#Feature Sample 1	Accession	PTM	AScore		IEDB
HYKVGENADSQIK	52.64	1487.74	13	-0.4	744.875	29.69	345000000	1	17499	200716_dc_IP79_NormalLung-W6Ab_oldDDA-OTOT_25cmPepMap2uTT_145m_01.raw	2	2	P07305|H10_HUMAN				1
HEENLKTKKQQR	52.02	1537.83	12	-1	385.465	12.94	4460000	1	5545	200716_dc_IP79_NormalLung-W6Ab_oldDDA-OTOT_25cmPepMap2uTT_145m_01.raw	2	2	P42766|RL35_HUMAN				0
HFDLSHGSAQVK	51.48	1324.65	12	-0.5	663.333	34.99	232000000	1	21285	200716_dc_IP79_NormalLung-W6Ab_oldDDA-OTOT_25cmPepMap2uTT_145m_01.raw	2	2	P69905|HBA_HUMAN				0
KVAPAPAVVKK	51.09	1106.72	11	-0.3	369.913	25.63	35700000	1	14615	200716_dc_IP79_NormalLung-W6Ab_oldDDA-OTOT_25cmPepMap2uTT_145m_01.raw	1	1	P62424|RL7A_HUMAN				1
RLNKHEENLKTK	50.46	1508.84	12	-0.5	378.218	24.1	12000000	1	13414	200716_dc_IP79_NormalLung-W6Ab_oldDDA-OTOT_25cmPepMap2uTT_145m_01.raw	2	2	P42766|RL35_HUMAN				0
HQKISSGKSSPFK	50.39	1429.77	13	-1.1	358.449	25.49	21700000	1	14525	200716_dc_IP79_NormalLung-W6Ab_oldDDA-OTOT_25cmPepMap2uTT_145m_01.raw	2	2	O95810|CAVN2_HUMAN				1
RVDDFKKAFSKEK	50.21	1596.86	13	-1.3	400.222	32.23	63300000	1	19359	200716_dc_IP79_NormalLung-W6Ab_oldDDA-OTOT_25cmPepMap2uTT_145m_01.raw	2	2	Q6NZI2|CAVN1_HUMAN				0
SLVSKGTLVQTK	49.56	1259.74	12	-1.3	1260.75	38.89	1560000000	1	24163	200716_dc_IP79_NormalLung-W6Ab_oldDDA-OTOT_25cmPepMap2uTT_145m_01.raw	3	3	P16403|H12_HUMAN:P10412|H14_HUMAN:P16402|H13_HUMAN:P16401|H15_HUMAN:Q02539|H11_HUMAN				1
HAGEYGAEALER	49.03	1301.6	12	-1.1	651.807	39.48	57500000	1	24503	200716_dc_IP79_NormalLung-W6Ab_oldDDA-OTOT_25cmPepMap2uTT_145m_01.raw	2	2	P69905|HBA_HUMAN				1
SNSM(+15.99)QTIQKTTTR	48.95	1510.74	13	-0.7	756.377	26.32	47700000	1	15135	200716_dc_IP79_NormalLung-W6Ab_oldDDA-OTOT_25cmPepMap2uTT_145m_01.raw	2	2	P05783|K1C18_HUMAN	Oxidation (M)	M4:Oxidation (M):1000.00		0
HVNPVQALSEFKA	48.95	1438.76	13	-0.5	720.385	67.9	4770000	1	44720	200716_dc_IP79_NormalLung-W6Ab_oldDDA-OTOT_25cmPepMap2uTT_145m_01.raw	2	2	P35221|CTNA1_HUMAN				0
HFELGGDKKRKGQ	48.19	1498.8	13	-0.4	375.707	24.6	59600000	1	13840	200716_dc_IP79_NormalLung-W6Ab_oldDDA-OTOT_25cmPepMap2uTT_145m_01.raw	2	2	Q969Q0|RL36L_HUMAN:P83881|RL36A_HUMAN				1
TYSLGSALRPSTS	48.19	1338.68	13	-0.1	1339.69	59.81	206000000	1	39168	200716_dc_IP79_NormalLung-W6Ab_oldDDA-OTOT_25cmPepMap2uTT_145m_01.raw	3	3	P08670|VIME_HUMAN				1
HVNPVQALSEFK	48.05	1367.72	12	-0.7	684.867	63.46	6320000	1	41625	200716_dc_IP79_NormalLung-W6Ab_oldDDA-OTOT_25cmPepMap2uTT_145m_01.raw	1	1	P35221|CTNA1_HUMAN				0
KYLQEEVNINRKK	47.58	1660.93	13	-1	416.238	32.33	12600000	1	19434	200716_dc_IP79_NormalLung-W6Ab_oldDDA-OTOT_25cmPepMap2uTT_145m_01.raw	2	2	Q9UHD8|SEPT9_HUMAN				0
HEGDEGPGHHHKP	47.53	1432.62	13	-0.2	478.548	15.13	7830000	1	7226	200716_dc_IP79_NormalLung-W6Ab_oldDDA-OTOT_25cmPepMap2uTT_145m_01.raw	3	3	P06702|S10A9_HUMAN				0
ATKYLKDVTLQK	47.18	1406.81	12	0.2	704.414	39.45	14400000	1	24598	200716_dc_IP79_NormalLung-W6Ab_oldDDA-OTOT_25cmPepMap2uTT_145m_01.raw	2	2	P18621|RL17_HUMAN				0
HDSFLKAVPSQK	47.04	1355.72	12	0.3	678.867	38.65	29200000	1	24009	200716_dc_IP79_NormalLung-W6Ab_oldDDA-OTOT_25cmPepMap2uTT_145m_01.raw	2	2	P31949|S10AB_HUMAN				0
HGVAQVRFVTGNK	46.98	1411.77	13	0	471.597	34.89	11400000	1	21241	200716_dc_IP79_NormalLung-W6Ab_oldDDA-OTOT_25cmPepMap2uTT_145m_01.raw	1	1	P62277|RS13_HUMAN				0
TGASGSFKLNK	46.95	1108.59	11	-0.1	555.301	31.6	3360000000	1	18837	200716_dc_IP79_NormalLung-W6Ab_oldDDA-OTOT_25cmPepMap2uTT_145m_01.raw	3	3	P16403|H12_HUMAN:P10412|H14_HUMAN:P16402|H13_HUMAN:P16401|H15_HUMAN:Q02539|H11_HUMAN				0
TRLKTKENLEKTR	46.93	1615.94	13	-0.3	404.991	24.85	161000000	1	14058	200716_dc_IP79_NormalLung-W6Ab_oldDDA-OTOT_25cmPepMap2uTT_145m_01.raw	2	2	Q6NZI2|CAVN1_HUMAN				0
HLVYESDQNKDGK	46.9	1531.73	13	-0.8	511.582	27.09	18000000	1	15648	200716_dc_IP79_NormalLung-W6Ab_oldDDA-OTOT_25cmPepMap2uTT_145m_01.raw	1	1	O43852|CALU_HUMAN				0
SGVYKKLTGKDVN	46.55	1407.77	13	-0.9	704.893	31.2	42000000	1	18666	200716_dc_IP79_NormalLung-W6Ab_oldDDA-OTOT_25cmPepMap2uTT_145m_01.raw	2	2	P62081|RS7_HUMAN				1
TDGKVFQFLNAK	46.47	1366.72	12	1	684.37	63.94	10600000	1	41940	200716_dc_IP79_NormalLung-W6Ab_oldDDA-OTOT_25cmPepMap2uTT_145m_01.raw	1	1	P83731|RL24_HUMAN				1
SGVSLAALKKALA	46.34	1227.76	13	-0.9	614.884	68.39	21800000	1	45023	200716_dc_IP79_NormalLung-W6Ab_oldDDA-OTOT_25cmPepMap2uTT_145m_01.raw	2	2	P16403|H12_HUMAN:P10412|H14_HUMAN:P16402|H13_HUMAN				0
RPKTGYSVRVQL	46.29	1402.8	12	-1.2	468.608	41.36	40400000	1	25858	200716_dc_IP79_NormalLung-W6Ab_oldDDA-OTOT_25cmPepMap2uTT_145m_01.raw	1	1	P35590|TIE1_HUMAN				0
TYSLGSALRPST	46.27	1251.65	12	-0.4	1252.65	59.86	18600000	1	38926	200716_dc_IP79_NormalLung-W6Ab_oldDDA-OTOT_25cmPepMap2uTT_145m_01.raw	1	1	P08670|VIME_HUMAN				0
SNSMQTIQKTTTR	46.06	1494.75	13	-2.2	748.379	31.79	10100000	1	19082	200716_dc_IP79_NormalLung-W6Ab_oldDDA-OTOT_25cmPepMap2uTT_145m_01.raw	1	1	P05783|K1C18_HUMAN				0
TPKEAIEGTYIDK	45.91	1463.75	13	0.4	732.883	45.04	4940000	1	28580	200716_dc_IP79_NormalLung-W6Ab_oldDDA-OTOT_25cmPepMap2uTT_145m_01.raw	2	2	P62280|RS11_HUMAN				0
TQGTKIASDGLK	45.74	1217.66	12	-1.7	609.837	30.47	6040000	1	18127	200716_dc_IP79_NormalLung-W6Ab_oldDDA-OTOT_25cmPepMap2uTT_145m_01.raw	1	1	P61247|RS3A_HUMAN				1
SFVKVYNYNH	45.72	1269.61	10	-1.1	635.814	47.05	16200000	1	29938	200716_dc_IP79_NormalLung-W6Ab_oldDDA-OTOT_25cmPepMap2uTT_145m_01.raw	2	2	P61353|RL27_HUMAN				0
SYPARVPPPPPIA	45.69	1360.75	13	-0.5	1361.76	60.9	692000000	1	39898	200716_dc_IP79_NormalLung-W6Ab_oldDDA-OTOT_25cmPepMap2uTT_145m_01.raw	2	2	P07910|HNRPC_HUMAN				1
KASGPPVSELITK	45.62	1325.76	13	0	663.885	46.02	219000000	1	29282	200716_dc_IP79_NormalLung-W6Ab_oldDDA-OTOT_25cmPepMap2uTT_145m_01.raw	2	2	P16403|H12_HUMAN:P10412|H14_HUMAN:P16402|H13_HUMAN				1
TPPKSPGDPSKDR	45.61	1380.7	13	-1.4	461.24	25.63	9450000	1	14645	200716_dc_IP79_NormalLung-W6Ab_oldDDA-OTOT_25cmPepMap2uTT_145m_01.raw	1	1	O94811|TPPP_HUMAN				0
KATGPPVSELITK	45.43	1339.77	13	-0.2	670.893	47.29	72800000	1	30295	200716_dc_IP79_NormalLung-W6Ab_oldDDA-OTOT_25cmPepMap2uTT_145m_01.raw	2	2	P16401|H15_HUMAN				1
TVAVGVIKAVDK	45.19	1198.73	12	-1.1	600.371	47	143000000	1	29798	200716_dc_IP79_NormalLung-W6Ab_oldDDA-OTOT_25cmPepMap2uTT_145m_01.raw	2	2	P68104|EF1A1_HUMAN:Q5VTE0|EF1A3_HUMAN				1
RLVTTGVLKQTK	45.17	1342.83	12	-0.5	448.617	33.02	34400000	1	19906	200716_dc_IP79_NormalLung-W6Ab_oldDDA-OTOT_25cmPepMap2uTT_145m_01.raw	2	2	P07305|H10_HUMAN				0
RPVINIVHKTL	45.16	1288.8	11	-0.6	430.606	42.49	4490000	1	26742	200716_dc_IP79_NormalLung-W6Ab_oldDDA-OTOT_25cmPepMap2uTT_145m_01.raw	1	1	P26006|ITA3_HUMAN				0
TDTSRYTGSHKER	45.13	1536.73	13	0	385.189	24.6	62800000	1	13846	200716_dc_IP79_NormalLung-W6Ab_oldDDA-OTOT_25cmPepMap2uTT_145m_01.raw	2	2	Q9BW30|TPPP3_HUMAN				0
SGKKLEDGPKFLK	45.09	1445.82	13	-0.1	482.949	32.38	42900000	1	19439	200716_dc_IP79_NormalLung-W6Ab_oldDDA-OTOT_25cmPepMap2uTT_145m_01.raw	2	2	P68104|EF1A1_HUMAN:Q5VTE0|EF1A3_HUMAN				1
HIYDTKLGTDK	45.07	1289.66	11	-0.2	645.838	34.94	112000000	1	21266	200716_dc_IP79_NormalLung-W6Ab_oldDDA-OTOT_25cmPepMap2uTT_145m_01.raw	2	2	Q99439|CNN2_HUMAN				1
PDPAKSAPAPK	45.07	1077.58	11	0.3	360.201	26.62	37500000	1	15270	200716_dc_IP79_NormalLung-W6Ab_oldDDA-OTOT_25cmPepMap2uTT_145m_01.raw	2	2	Q93079|H2B1H_HUMAN:Q5QNW6|H2B2F_HUMAN:P23527|H2B1O_HUMAN				1
HWYTGEGMDEM(+15.99)EF	44.91	1646.6	13	-0.8	824.308	74.23	3570000	1	49206	200716_dc_IP79_NormalLung-W6Ab_oldDDA-OTOT_25cmPepMap2uTT_145m_01.raw	1	1	P07437|TBB5_HUMAN:P68371|TBB4B_HUMAN:P04350|TBB4A_HUMAN:Q9BVA1|TBB2B_HUMAN:Q13885|TBB2A_HUMAN:Q13509|TBB3_HUMAN:Q3ZCM7|TBB8_HUMAN:A6NNZ2|TBB8L_HUMAN	Oxidation (M)	M11:Oxidation (M):49.37		0
TYFQAKIRALK	44.86	1337.78	11	-0.6	669.898	44.45	85000000	1	28101	200716_dc_IP79_NormalLung-W6Ab_oldDDA-OTOT_25cmPepMap2uTT_145m_01.raw	2	2	O00391|QSOX1_HUMAN				0
HRLDLGEDYPSGK	44.76	1485.72	13	0	496.248	41.01	17900000	1	25612	200716_dc_IP79_NormalLung-W6Ab_oldDDA-OTOT_25cmPepMap2uTT_145m_01.raw	2	2	O43143|DHX15_HUMAN				1
RPKRPPLKEFF	44.58	1413.82	11	-1.1	354.463	42.14	18000000	1	26349	200716_dc_IP79_NormalLung-W6Ab_oldDDA-OTOT_25cmPepMap2uTT_145m_01.raw	1	1	Q9P265|DIP2B_HUMAN:Q14689|DIP2A_HUMAN				0
FM(+15.99)GKVVNPTQK	44.56	1263.66	11	-1.9	632.838	32.14	47400000	1	19295	200716_dc_IP79_NormalLung-W6Ab_oldDDA-OTOT_25cmPepMap2uTT_145m_01.raw	2	2	P01009|A1AT_HUMAN	Oxidation (M)	M2:Oxidation (M):1000.00		0
TGAAPIIDVVR	44.47	1110.64	11	0.2	1111.65	62.28	130000000	1	40676	200716_dc_IP79_NormalLung-W6Ab_oldDDA-OTOT_25cmPepMap2uTT_145m_01.raw	2	2	P46776|RL27A_HUMAN				0
TSSTIKSTPSGK	44.45	1192.63	12	-0.9	597.322	24.82	24700000	1	14003	200716_dc_IP79_NormalLung-W6Ab_oldDDA-OTOT_25cmPepMap2uTT_145m_01.raw	1	1	P33241|LSP1_HUMAN				0
SAVGHEYVAEVEK	44.31	1416.69	13	-1.4	473.236	41.8	4130000	1	26224	200716_dc_IP79_NormalLung-W6Ab_oldDDA-OTOT_25cmPepMap2uTT_145m_01.raw	1	1	P14317|HCLS1_HUMAN				0
HDSKIKFPLPHR	44.24	1473.82	12	-1.4	369.462	37.45	16200000	1	23080	200716_dc_IP79_NormalLung-W6Ab_oldDDA-OTOT_25cmPepMap2uTT_145m_01.raw	2	2	Q02543|RL18A_HUMAN				0
TSFTPNQETQAQR	44.2	1506.71	13	-1.2	754.36	39.09	7670000	1	24291	200716_dc_IP79_NormalLung-W6Ab_oldDDA-OTOT_25cmPepMap2uTT_145m_01.raw	1	1	P41218|MNDA_HUMAN				0
ASKTQYFHV	44.17	1079.54	9	-0.4	540.777	40.54	56800000	1	25288	200716_dc_IP79_NormalLung-W6Ab_oldDDA-OTOT_25cmPepMap2uTT_145m_01.raw	2	2	P41218|MNDA_HUMAN				0
HVFLTGPPGVGK	44.11	1207.67	12	-0.9	604.842	50.17	2160000	1	32192	200716_dc_IP79_NormalLung-W6Ab_oldDDA-OTOT_25cmPepMap2uTT_145m_01.raw	1	1	Q9BSD7|NTPCR_HUMAN				0
TENSTSAPAAKPK	44.02	1300.66	13	-0.6	434.561	24.85	241000000	1	14027	200716_dc_IP79_NormalLung-W6Ab_oldDDA-OTOT_25cmPepMap2uTT_145m_01.raw	2	2	P07305|H10_HUMAN				0
GGPGTASRPSSS	43.94	1059.49	12	-1	1060.5	25.83	408000000	1	14769	200716_dc_IP79_NormalLung-W6Ab_oldDDA-OTOT_25cmPepMap2uTT_145m_01.raw	2	2	P08670|VIME_HUMAN				1
SYSFDEIRKNAQ	43.94	1456.69	12	-0.8	729.354	51.58	28500000	1	33131	200716_dc_IP79_NormalLung-W6Ab_oldDDA-OTOT_25cmPepMap2uTT_145m_01.raw	2	2	P43490|NAMPT_HUMAN				0
KYVIYIERVQREK	43.88	1722.98	13	-1.9	431.751	41.16	2960000	1	25865	200716_dc_IP79_NormalLung-W6Ab_oldDDA-OTOT_25cmPepMap2uTT_145m_01.raw	1	1	P61254|RL26_HUMAN:Q9UNX3|RL26L_HUMAN				0
HHPGIAEFPSRGK	43.87	1431.74	13	-1.1	358.941	30.56	7120000	1	18175	200716_dc_IP79_NormalLung-W6Ab_oldDDA-OTOT_25cmPepMap2uTT_145m_01.raw	1	1	P02671|FIBA_HUMAN				0
HVDSLSQRSPK	43.81	1252.65	11	-0.7	418.558	25.73	18800000	1	14666	200716_dc_IP79_NormalLung-W6Ab_oldDDA-OTOT_25cmPepMap2uTT_145m_01.raw	1	1	Q9UHD8|SEPT9_HUMAN				0
SGPPVSELITK	43.79	1126.62	11	-1.1	1127.63	56.56	1670000000	1	36629	200716_dc_IP79_NormalLung-W6Ab_oldDDA-OTOT_25cmPepMap2uTT_145m_01.raw	2	2	P16403|H12_HUMAN:P10412|H14_HUMAN:P16402|H13_HUMAN				1
KVAPAPAVVK	43.78	978.623	10	-1	490.318	28.73	10100000	1	16872	200716_dc_IP79_NormalLung-W6Ab_oldDDA-OTOT_25cmPepMap2uTT_145m_01.raw	1	1	P62424|RL7A_HUMAN				1
HWYTGEGM(+15.99)DEM(+15.99)EF	43.73	1662.6	13	-0.5	832.305	66.17	18200000	1	43436	200716_dc_IP79_NormalLung-W6Ab_oldDDA-OTOT_25cmPepMap2uTT_145m_01.raw	1	1	P07437|TBB5_HUMAN:P68371|TBB4B_HUMAN:P04350|TBB4A_HUMAN:Q9BVA1|TBB2B_HUMAN:Q13885|TBB2A_HUMAN:Q13509|TBB3_HUMAN:Q3ZCM7|TBB8_HUMAN:A6NNZ2|TBB8L_HUMAN	Oxidation (M)	M8:Oxidation (M):1000.00;M11:Oxidation (M):1000.00		0
TPSYEIRAVGNK	43.69	1333.7	12	-0.8	667.856	40.25	27600000	1	25140	200716_dc_IP79_NormalLung-W6Ab_oldDDA-OTOT_25cmPepMap2uTT_145m_01.raw	2	2	Q08211|DHX9_HUMAN				0
HAAENPGKYN	43.69	1099.5	10	-1.5	550.759	24.99	6110000	1	14178	200716_dc_IP79_NormalLung-W6Ab_oldDDA-OTOT_25cmPepMap2uTT_145m_01.raw	1	1	Q00839|HNRPU_HUMAN				0
HLKDAQIFIQK	43.67	1339.76	11	-0.9	670.887	41.85	149000000	1	26190	200716_dc_IP79_NormalLung-W6Ab_oldDDA-OTOT_25cmPepMap2uTT_145m_01.raw	2	2	P04040|CATA_HUMAN				1
TYSLGSALRP	43.64	1063.57	10	-0.4	1064.57	61.09	726000000	1	39831	200716_dc_IP79_NormalLung-W6Ab_oldDDA-OTOT_25cmPepMap2uTT_145m_01.raw	3	3	P08670|VIME_HUMAN				1
VPNVGKSSLINSL	43.63	1326.75	13	-1	664.382	68.69	15500000	1	45190	200716_dc_IP79_NormalLung-W6Ab_oldDDA-OTOT_25cmPepMap2uTT_145m_01.raw	1	1	Q9BT17|MTG1_HUMAN				1
HPFHVIRINK	43.62	1259.73	10	0.5	420.916	33.81	11100000	1	20506	200716_dc_IP79_NormalLung-W6Ab_oldDDA-OTOT_25cmPepMap2uTT_145m_01.raw	1	1	P27635|RL10_HUMAN:Q96L21|RL10L_HUMAN				0
TFGKKKGPNANS	43.59	1247.66	12	-0.5	624.838	18.97	32100000	1	10017	200716_dc_IP79_NormalLung-W6Ab_oldDDA-OTOT_25cmPepMap2uTT_145m_01.raw	1	1	P62861|RS30_HUMAN				1
SFTPDHVVYARSK	43.57	1505.76	13	-0.8	753.888	39.67	40600000	1	24710	200716_dc_IP79_NormalLung-W6Ab_oldDDA-OTOT_25cmPepMap2uTT_145m_01.raw	1	1	Q6NZI2|CAVN1_HUMAN				0
HFDLSHGSAQ	43.57	1097.49	10	0.4	549.752	36.16	21300000	1	22147	200716_dc_IP79_NormalLung-W6Ab_oldDDA-OTOT_25cmPepMap2uTT_145m_01.raw	2	2	P69905|HBA_HUMAN				0
GFTAQVIILNHP	43.54	1308.72	12	-0.8	655.366	77.99	6490000	1	51720	200716_dc_IP79_NormalLung-W6Ab_oldDDA-OTOT_25cmPepMap2uTT_145m_01.raw	1	1	P68104|EF1A1_HUMAN:Q5VTE0|EF1A3_HUMAN				0
TQGTKIASDGLKG	43.51	1274.68	13	-1.6	638.348	31.6	14700000	1	18976	200716_dc_IP79_NormalLung-W6Ab_oldDDA-OTOT_25cmPepMap2uTT_145m_01.raw	2	2	P61247|RS3A_HUMAN				0
HFDLSHGSAQV	43.5	1196.56	11	0.5	599.286	46.12	164000000	1	29215	200716_dc_IP79_NormalLung-W6Ab_oldDDA-OTOT_25cmPepMap2uTT_145m_01.raw	2	2	P69905|HBA_HUMAN				1
ASGPPVSELITK	43.45	1197.66	12	-0.7	599.837	57.89	95600000	1	37639	200716_dc_IP79_NormalLung-W6Ab_oldDDA-OTOT_25cmPepMap2uTT_145m_01.raw	1	1	P16403|H12_HUMAN:P10412|H14_HUMAN:P16402|H13_HUMAN				1
GTGASGSFKLNK	43.44	1165.61	12	-0.8	1166.62	32.14	1100000000	1	19336	200716_dc_IP79_NormalLung-W6Ab_oldDDA-OTOT_25cmPepMap2uTT_145m_01.raw	3	3	P16403|H12_HUMAN:P10412|H14_HUMAN:P16402|H13_HUMAN:P16401|H15_HUMAN:Q02539|H11_HUMAN				1
TKYLKDVTLQK	43.39	1335.78	11	-1	446.265	38.56	11400000	1	23854	200716_dc_IP79_NormalLung-W6Ab_oldDDA-OTOT_25cmPepMap2uTT_145m_01.raw	1	1	P18621|RL17_HUMAN				0
GTGASGSFKLN	43.39	1037.51	11	-1.1	1038.52	43.27	172000000	1	27260	200716_dc_IP79_NormalLung-W6Ab_oldDDA-OTOT_25cmPepMap2uTT_145m_01.raw	2	2	P16403|H12_HUMAN:P10412|H14_HUMAN:P16402|H13_HUMAN:P16401|H15_HUMAN:Q02539|H11_HUMAN				1
HSFDPFADASK	43.36	1220.55	11	-0.7	611.28	53.99	10100000	1	34811	200716_dc_IP79_NormalLung-W6Ab_oldDDA-OTOT_25cmPepMap2uTT_145m_01.raw	1	1	P41567|EIF1_HUMAN				1
TAVYKVPPFTFH	43.35	1405.74	12	-0.9	469.587	68.54	6420000	1	45174	200716_dc_IP79_NormalLung-W6Ab_oldDDA-OTOT_25cmPepMap2uTT_145m_01.raw	1	1	Q6NZI2|CAVN1_HUMAN				0
SPLFM(+15.99)GKVVNPTQ	43.31	1432.74	13	-1.6	717.375	58.83	2360000	1	38361	200716_dc_IP79_NormalLung-W6Ab_oldDDA-OTOT_25cmPepMap2uTT_145m_01.raw	1	1	P01009|A1AT_HUMAN	Oxidation (M)	M5:Oxidation (M):1000.00		0
YVTTSTRTY	43.14	1090.53	9	-2.1	1091.53	37.03	9940000000	1	22728	200716_dc_IP79_NormalLung-W6Ab_oldDDA-OTOT_25cmPepMap2uTT_145m_01.raw	2	2	P08670|VIME_HUMAN				1
RQFDNFKRVFK	43.12	1483.8	11	-1.7	495.608	42.64	16600000	1	26774	200716_dc_IP79_NormalLung-W6Ab_oldDDA-OTOT_25cmPepMap2uTT_145m_01.raw	2	2	O43427|FIBP_HUMAN				1
TFDQLALDSPK	43.03	1233.62	11	-0.5	617.819	64.2	1730000	1	42148	200716_dc_IP79_NormalLung-W6Ab_oldDDA-OTOT_25cmPepMap2uTT_145m_01.raw	1	1	Q07020|RL18_HUMAN				0
HPKTHVTHHL	43.03	1205.64	10	-2	402.887	20.8	205000000	1	11480	200716_dc_IP79_NormalLung-W6Ab_oldDDA-OTOT_25cmPepMap2uTT_145m_01.raw	3	3	Q29960|1C16_HUMAN				0
GYGQGAGTLSTDK	43.02	1253.59	13	-0.8	627.801	38.07	1020000	1	23620	200716_dc_IP79_NormalLung-W6Ab_oldDDA-OTOT_25cmPepMap2uTT_145m_01.raw	1	1	P21291|CSRP1_HUMAN				0
KAKKPAAATVTK	42.98	1212.76	12	0.3	607.385	15.27	41500000	1	7324	200716_dc_IP79_NormalLung-W6Ab_oldDDA-OTOT_25cmPepMap2uTT_145m_01.raw	2	2	P16403|H12_HUMAN				1
HFNAPSHIR	42.95	1077.55	9	-0.4	360.189	28.59	17300000	1	16745	200716_dc_IP79_NormalLung-W6Ab_oldDDA-OTOT_25cmPepMap2uTT_145m_01.raw	1	1	P61254|RL26_HUMAN				1
ALAAAGYDVEKNN	42.89	1334.65	13	-0.4	668.33	46.75	5970000	1	29771	200716_dc_IP79_NormalLung-W6Ab_oldDDA-OTOT_25cmPepMap2uTT_145m_01.raw	1	1	P16403|H12_HUMAN:P10412|H14_HUMAN:P16402|H13_HUMAN:Q02539|H11_HUMAN:P22492|H1T_HUMAN				0
TPDAMKAAMAL	42.87	1118.55	11	-1.2	560.28	69.53	2630000	1	45868	200716_dc_IP79_NormalLung-W6Ab_oldDDA-OTOT_25cmPepMap2uTT_145m_01.raw	1	1	P02792|FRIL_HUMAN				1
KPANAVLHKVL	42.87	1188.73	11	-1.6	397.251	35.92	4760000	1	22009	200716_dc_IP79_NormalLung-W6Ab_oldDDA-OTOT_25cmPepMap2uTT_145m_01.raw	1	1	Q14839|CHD4_HUMAN:Q12873|CHD3_HUMAN:Q8TDI0|CHD5_HUMAN				0
HGLYEKKKTSR	42.85	1345.75	11	-1	449.589	15.22	4700000	1	7138	200716_dc_IP79_NormalLung-W6Ab_oldDDA-OTOT_25cmPepMap2uTT_145m_01.raw	2	2	P62847|RS24_HUMAN				0
KYKPLDLRPK	42.81	1256.76	10	-0.9	419.927	31.65	56100000	1	18890	200716_dc_IP79_NormalLung-W6Ab_oldDDA-OTOT_25cmPepMap2uTT_145m_01.raw	1	1	P42766|RL35_HUMAN				1
TESHHKAKGK	42.81	1121.59	10	0.2	561.804	7.96	4980000	1	2110	200716_dc_IP79_NormalLung-W6Ab_oldDDA-OTOT_25cmPepMap2uTT_145m_01.raw	2	2	P20671|H2A1D_HUMAN:P0C0S8|H2A1_HUMAN:P04908|H2A1B_HUMAN:Q93077|H2A1C_HUMAN:Q7L7L0|H2A3_HUMAN:Q6FI13|H2A2A_HUMAN				0
AAAGYDVEKNNS	42.77	1237.56	12	-1.8	619.785	32.63	5890000	1	19648	200716_dc_IP79_NormalLung-W6Ab_oldDDA-OTOT_25cmPepMap2uTT_145m_01.raw	1	1	P16403|H12_HUMAN:P10412|H14_HUMAN:P16402|H13_HUMAN:Q02539|H11_HUMAN:P22492|H1T_HUMAN				0
TAVYKVPPFT	42.75	1121.61	10	-0.3	561.813	67.01	67700000	1	44692	200716_dc_IP79_NormalLung-W6Ab_oldDDA-OTOT_25cmPepMap2uTT_145m_01.raw	1	1	Q6NZI2|CAVN1_HUMAN				0
YYKVDENGKIS	42.7	1314.65	11	-0.9	658.33	41.41	13800000	1	25933	200716_dc_IP79_NormalLung-W6Ab_oldDDA-OTOT_25cmPepMap2uTT_145m_01.raw	2	2	P62979|RS27A_HUMAN				0
KQYDYDSSTIRK	42.57	1502.74	12	-0.3	501.919	31.4	1960000	1	18816	200716_dc_IP79_NormalLung-W6Ab_oldDDA-OTOT_25cmPepMap2uTT_145m_01.raw	1	1	Q9BZQ8|NIBAN_HUMAN				1
TVTPAKAVTTPGK	42.57	1269.73	13	-0.3	635.872	30.86	167000000	1	18322	200716_dc_IP79_NormalLung-W6Ab_oldDDA-OTOT_25cmPepMap2uTT_145m_01.raw	2	2	P19338|NUCL_HUMAN				0
TAVYKVPPFTF	42.5	1268.68	11	1.9	635.349	84.71	15500000	1	57063	200716_dc_IP79_NormalLung-W6Ab_oldDDA-OTOT_25cmPepMap2uTT_145m_01.raw	1	1	Q6NZI2|CAVN1_HUMAN				0
TDQAQKAEGAGDA	42.45	1260.56	13	-1	631.286	27.04	7250000	1	15627	200716_dc_IP79_NormalLung-W6Ab_oldDDA-OTOT_25cmPepMap2uTT_145m_01.raw	1	1	P05204|HMGN2_HUMAN				1
TSTSLGKGSFLDK	42.38	1339.7	13	-0.8	670.856	44.7	8450000	1	28311	200716_dc_IP79_NormalLung-W6Ab_oldDDA-OTOT_25cmPepMap2uTT_145m_01.raw	2	2	Q9BW04|SARG_HUMAN				0
FVYFQNHDAADK	42.36	1453.66	12	-1.4	485.561	46.31	9730000	1	29399	200716_dc_IP79_NormalLung-W6Ab_oldDDA-OTOT_25cmPepMap2uTT_145m_01.raw	2	2	Q13151|ROA0_HUMAN				0
TETQEKNPLPSKE	42.3	1499.75	13	-1.5	750.88	31.74	89700000	1	18977	200716_dc_IP79_NormalLung-W6Ab_oldDDA-OTOT_25cmPepMap2uTT_145m_01.raw	2	2	P62328|TYB4_HUMAN				1
HGFSDNQKLWER	42.29	1515.72	12	-2	506.247	44.85	2360000	1	28435	200716_dc_IP79_NormalLung-W6Ab_oldDDA-OTOT_25cmPepMap2uTT_145m_01.raw	1	1	Q8WW12|PCNP_HUMAN				0
ASGEAKPKVK	42.26	1013.59	10	-0.2	507.801	14.31	638000	1	6529	200716_dc_IP79_NormalLung-W6Ab_oldDDA-OTOT_25cmPepMap2uTT_145m_01.raw	1	1	P16403|H12_HUMAN				0
RQFEGRHSKGVAK	42.2	1498.81	13	-0.5	375.71	20.6	3310000	1	10928	200716_dc_IP79_NormalLung-W6Ab_oldDDA-OTOT_25cmPepMap2uTT_145m_01.raw	1	1	Q6P2Q9|PRP8_HUMAN				1
TQHAVGIVVNK	42.18	1164.66	11	-1.3	583.337	32.92	19400000	1	19882	200716_dc_IP79_NormalLung-W6Ab_oldDDA-OTOT_25cmPepMap2uTT_145m_01.raw	2	2	P46778|RL21_HUMAN				0
GDKAKVKDEPQRR	42.13	1525.83	13	-0.4	382.465	16.38	13700000	1	7870	200716_dc_IP79_NormalLung-W6Ab_oldDDA-OTOT_25cmPepMap2uTT_145m_01.raw	2	2	P05204|HMGN2_HUMAN:O00479|HMGN4_HUMAN				0
TAM(+15.99)AAAKAPTK	42.11	1075.57	11	-1.4	538.791	24.6	23300000	1	13859	200716_dc_IP79_NormalLung-W6Ab_oldDDA-OTOT_25cmPepMap2uTT_145m_01.raw	2	2	P83731|RL24_HUMAN	Oxidation (M)	M3:Oxidation (M):1000.00		0
HGLYEKKKTS	42.09	1189.65	10	-0.5	595.83	14.98	1150000	1	6996	200716_dc_IP79_NormalLung-W6Ab_oldDDA-OTOT_25cmPepMap2uTT_145m_01.raw	1	1	P62847|RS24_HUMAN				0
GTKPKKPVGAAK	42.05	1180.73	12	0.1	394.584	13.69	3070000	1	6063	200716_dc_IP79_NormalLung-W6Ab_oldDDA-OTOT_25cmPepMap2uTT_145m_01.raw	2	2	P16403|H12_HUMAN				0
YGGGFNERENVEY	42.05	1532.65	13	-1.1	767.333	56.16	1310000	1	36491	200716_dc_IP79_NormalLung-W6Ab_oldDDA-OTOT_25cmPepMap2uTT_145m_01.raw	1	1	O95218|ZRAB2_HUMAN				0
TFNLEKQNHTP	42.01	1327.65	11	-0.3	664.833	39.24	25700000	1	24618	200716_dc_IP79_NormalLung-W6Ab_oldDDA-OTOT_25cmPepMap2uTT_145m_01.raw	1	1	Q15233|NONO_HUMAN				1
YYKVDENGKISR	42	1470.75	12	-0.6	368.694	36.87	40200000	1	22706	200716_dc_IP79_NormalLung-W6Ab_oldDDA-OTOT_25cmPepMap2uTT_145m_01.raw	2	2	P62979|RS27A_HUMAN				1
TGASGSFKLN	41.95	980.493	10	-0.9	491.253	42.78	1500000000	1	26767	200716_dc_IP79_NormalLung-W6Ab_oldDDA-OTOT_25cmPepMap2uTT_145m_01.raw	2	2	P16403|H12_HUMAN:P10412|H14_HUMAN:P16402|H13_HUMAN:P16401|H15_HUMAN:Q02539|H11_HUMAN				0
QTVAVGVIKAVDK	41.93	1326.79	13	-0.1	664.401	50.54	22000000	1	32430	200716_dc_IP79_NormalLung-W6Ab_oldDDA-OTOT_25cmPepMap2uTT_145m_01.raw	2	2	P68104|EF1A1_HUMAN:Q5VTE0|EF1A3_HUMAN				1
SIEVENDFLPVEK	41.9	1517.76	13	-3.6	759.885	77.39	1000000	1	51450	200716_dc_IP79_NormalLung-W6Ab_oldDDA-OTOT_25cmPepMap2uTT_145m_01.raw	1	1	Q96B97|SH3K1_HUMAN				0
KTKTEQFQARK	41.83	1363.76	11	-1.3	455.592	19.17	6080000	1	9912	200716_dc_IP79_NormalLung-W6Ab_oldDDA-OTOT_25cmPepMap2uTT_145m_01.raw	1	1	Q9H501|ESF1_HUMAN				0
TGGAASKLSK	41.82	918.513	10	-0.8	460.264	23.17	3130000	1	12913	200716_dc_IP79_NormalLung-W6Ab_oldDDA-OTOT_25cmPepMap2uTT_145m_01.raw	1	1	P42766|RL35_HUMAN				0
HVSHGHGRIGK	41.81	1183.63	11	0.1	395.551	13.55	5840000	1	5948	200716_dc_IP79_NormalLung-W6Ab_oldDDA-OTOT_25cmPepMap2uTT_145m_01.raw	2	2	P46776|RL27A_HUMAN				1
HVAYGGYSTPEDR	41.78	1450.65	13	-1.6	484.556	40.32	4020000	1	25177	200716_dc_IP79_NormalLung-W6Ab_oldDDA-OTOT_25cmPepMap2uTT_145m_01.raw	1	1	Q9HBL0|TENS1_HUMAN				0
KVHPAVVIRQ	41.76	1145.7	10	-0.9	382.908	28.44	3040000	1	16671	200716_dc_IP79_NormalLung-W6Ab_oldDDA-OTOT_25cmPepMap2uTT_145m_01.raw	1	1	P62829|RL23_HUMAN				0
TNVKAAWGKVGA	41.72	1200.66	12	-0.9	601.337	41.8	12000000	1	26193	200716_dc_IP79_NormalLung-W6Ab_oldDDA-OTOT_25cmPepMap2uTT_145m_01.raw	2	2	P69905|HBA_HUMAN				0
SFRYNGLIHR	41.71	1261.67	10	0.2	421.563	43.27	15800000	1	27241	200716_dc_IP79_NormalLung-W6Ab_oldDDA-OTOT_25cmPepMap2uTT_145m_01.raw	1	1	P46779|RL28_HUMAN				1
TIQNDIM(+15.99)LLQLSR	41.71	1559.83	13	0.8	780.925	83.72	24200000	1	56154	200716_dc_IP79_NormalLung-W6Ab_oldDDA-OTOT_25cmPepMap2uTT_145m_01.raw	1	1	P08311|CATG_HUMAN	Oxidation (M)	M7:Oxidation (M):1000.00		0
TVRFNVLKVTK	41.7	1303.8	11	-0.4	435.606	45.09	52700000	1	28404	200716_dc_IP79_NormalLung-W6Ab_oldDDA-OTOT_25cmPepMap2uTT_145m_01.raw	2	2	P62280|RS11_HUMAN				1
LPKGDINIEGPSM(+15.99)	41.69	1385.69	13	-1.3	693.849	56.36	19500000	1	36470	200716_dc_IP79_NormalLung-W6Ab_oldDDA-OTOT_25cmPepMap2uTT_145m_01.raw	1	1	Q09666|AHNK_HUMAN	Oxidation (M)	M13:Oxidation (M):1000.00		0
KSKNILFVITK	41.69	1289.81	11	-0.5	645.91	48.23	53400000	1	30803	200716_dc_IP79_NormalLung-W6Ab_oldDDA-OTOT_25cmPepMap2uTT_145m_01.raw	2	2	E9PAV3|NACAM_HUMAN:Q13765|NACA_HUMAN:Q9BZK3|NACP4_HUMAN:Q9H009|NACA2_HUMAN				1
TPLHNDNSWIRQ	41.65	1479.72	12	-0.5	494.248	47.15	3590000	1	30040	200716_dc_IP79_NormalLung-W6Ab_oldDDA-OTOT_25cmPepMap2uTT_145m_01.raw	1	1	Q8WWI1|LMO7_HUMAN				0
KLTSDDVKEQIYK	41.62	1565.83	13	-0.6	522.95	41.9	3170000	1	26350	200716_dc_IP79_NormalLung-W6Ab_oldDDA-OTOT_25cmPepMap2uTT_145m_01.raw	1	1	P62277|RS13_HUMAN				0
HNLGHGHKHER	41.59	1320.65	11	-0.9	441.225	11.74	1650000	1	4738	200716_dc_IP79_NormalLung-W6Ab_oldDDA-OTOT_25cmPepMap2uTT_145m_01.raw	2	2	P01042|KNG1_HUMAN				0
SSARPGGLGSSS	41.58	1061.51	12	-1.4	531.762	28.88	29200000	1	16958	200716_dc_IP79_NormalLung-W6Ab_oldDDA-OTOT_25cmPepMap2uTT_145m_01.raw	2	2	P08729|K2C7_HUMAN				0
TM(+15.99)VADTPENLRLK	41.57	1502.78	13	-1	501.932	47.35	6770000	1	30204	200716_dc_IP79_NormalLung-W6Ab_oldDDA-OTOT_25cmPepMap2uTT_145m_01.raw	1	1	Q14847|LASP1_HUMAN	Oxidation (M)	M2:Oxidation (M):1000.00		0
TKKPKATPVKKA	41.55	1295.83	12	0.1	432.95	13.31	9660000	1	5780	200716_dc_IP79_NormalLung-W6Ab_oldDDA-OTOT_25cmPepMap2uTT_145m_01.raw	2	2	P07305|H10_HUMAN				0
VPKMKVPKF	41.53	1072.65	9	-0.9	537.33	44.81	149000000	1	28484	200716_dc_IP79_NormalLung-W6Ab_oldDDA-OTOT_25cmPepMap2uTT_145m_01.raw	2	2	Q09666|AHNK_HUMAN				0
HRAQVIYTR	41.51	1142.63	9	-0.1	381.884	26.75	8710000	1	15434	200716_dc_IP79_NormalLung-W6Ab_oldDDA-OTOT_25cmPepMap2uTT_145m_01.raw	1	1	P62851|RS25_HUMAN				1
NNASTDYDLSDK	41.5	1341.57	12	-0.2	671.791	41.61	3840000	1	26060	200716_dc_IP79_NormalLung-W6Ab_oldDDA-OTOT_25cmPepMap2uTT_145m_01.raw	1	1	P39023|RL3_HUMAN				1
TPLHNDNSWIRQR	41.47	1635.82	13	-1.1	409.963	40.89	6080000	1	25586	200716_dc_IP79_NormalLung-W6Ab_oldDDA-OTOT_25cmPepMap2uTT_145m_01.raw	1	1	Q8WWI1|LMO7_HUMAN				0
TSSTSYNRGDSTF	41.47	1421.61	13	-1.6	711.809	41.51	3920000	1	26001	200716_dc_IP79_NormalLung-W6Ab_oldDDA-OTOT_25cmPepMap2uTT_145m_01.raw	1	1	P02671|FIBA_HUMAN				0
TGASGSFKLN(+.98)K	41.46	1109.57	11	-1.1	555.793	33.96	83900000	1	20562	200716_dc_IP79_NormalLung-W6Ab_oldDDA-OTOT_25cmPepMap2uTT_145m_01.raw	4	4	P16403|H12_HUMAN:P10412|H14_HUMAN:P16402|H13_HUMAN:P16401|H15_HUMAN:Q02539|H11_HUMAN	Deamidation (NQ)	N10:Deamidation (NQ):1000.00		0
RAKEAAEQDVEKK	41.45	1500.79	13	-2.1	376.204	24.35	8160000	1	13692	200716_dc_IP79_NormalLung-W6Ab_oldDDA-OTOT_25cmPepMap2uTT_145m_01.raw	1	1	P26373|RL13_HUMAN				0
HLTDAYFKKKKL	41.37	1490.86	12	-0.6	497.961	33.02	2740000	1	20058	200716_dc_IP79_NormalLung-W6Ab_oldDDA-OTOT_25cmPepMap2uTT_145m_01.raw	1	1	Q02878|RL6_HUMAN				0
HEENLKTKKQQ	41.37	1381.73	11	-0.6	691.872	13.21	2020000	1	5789	200716_dc_IP79_NormalLung-W6Ab_oldDDA-OTOT_25cmPepMap2uTT_145m_01.raw	2	2	P42766|RL35_HUMAN				0
KAAGAGKVTK	41.34	929.566	10	0.4	930.573	11.45	3110000	1	4540	200716_dc_IP79_NormalLung-W6Ab_oldDDA-OTOT_25cmPepMap2uTT_145m_01.raw	2	2	P68104|EF1A1_HUMAN:Q5VTE0|EF1A3_HUMAN				1
TLVQTKGTGASGS	41.29	1205.63	13	-1.1	603.819	30.67	29300000	1	18206	200716_dc_IP79_NormalLung-W6Ab_oldDDA-OTOT_25cmPepMap2uTT_145m_01.raw	1	1	P16403|H12_HUMAN:P10412|H14_HUMAN:P16402|H13_HUMAN:P16401|H15_HUMAN:Q02539|H11_HUMAN				0
TVGMNFKTPRGPV	41.27	1402.74	13	-1.1	468.587	54.19	27200000	1	34976	200716_dc_IP79_NormalLung-W6Ab_oldDDA-OTOT_25cmPepMap2uTT_145m_01.raw	2	2	P08708|RS17_HUMAN				0
MPKMKMPTF	41.26	1109.54	9	-1.6	555.778	62.52	10300000	1	40885	200716_dc_IP79_NormalLung-W6Ab_oldDDA-OTOT_25cmPepMap2uTT_145m_01.raw	2	2	Q09666|AHNK_HUMAN				0
HWGGNVLGPK	41.23	1063.56	10	-0.7	532.785	41.65	27100000	1	26071	200716_dc_IP79_NormalLung-W6Ab_oldDDA-OTOT_25cmPepMap2uTT_145m_01.raw	1	1	P62424|RL7A_HUMAN				0
KPAKTQKTSL	41.22	1100.66	10	0.1	551.335	17.25	55000000	1	8482	200716_dc_IP79_NormalLung-W6Ab_oldDDA-OTOT_25cmPepMap2uTT_145m_01.raw	2	2	O15539|RGS5_HUMAN				1
LPKKTESHHKAK	41.21	1402.8	12	0.2	351.709	11.31	1290000	1	4418	200716_dc_IP79_NormalLung-W6Ab_oldDDA-OTOT_25cmPepMap2uTT_145m_01.raw	2	2	P20671|H2A1D_HUMAN:P0C0S8|H2A1_HUMAN:P04908|H2A1B_HUMAN:Q93077|H2A1C_HUMAN:Q7L7L0|H2A3_HUMAN:Q6FI13|H2A2A_HUMAN:Q96KK5|H2A1H_HUMAN				0
SYTTPKKNKHKR	41.21	1486.84	12	-0.6	372.716	12.12	1490000	1	4978	200716_dc_IP79_NormalLung-W6Ab_oldDDA-OTOT_25cmPepMap2uTT_145m_01.raw	2	2	P62979|RS27A_HUMAN				0
IPKVQHVIHY	41.18	1232.7	10	-0.4	617.359	41.02	41400000	1	25653	200716_dc_IP79_NormalLung-W6Ab_oldDDA-OTOT_25cmPepMap2uTT_145m_01.raw	2	2	Q9GZR7|DDX24_HUMAN				0
HEENLKTKK	41.17	1125.61	9	-0.8	376.212	12.31	3440000	1	5139	200716_dc_IP79_NormalLung-W6Ab_oldDDA-OTOT_25cmPepMap2uTT_145m_01.raw	2	2	P42766|RL35_HUMAN				0
TAPAPTAHKAKK	41.15	1219.7	12	-0.6	407.575	13.03	2140000	1	5589	200716_dc_IP79_NormalLung-W6Ab_oldDDA-OTOT_25cmPepMap2uTT_145m_01.raw	2	2	Q92522|H1X_HUMAN				0
SGPPVSELITKA	41.14	1197.66	12	-0.7	599.837	63.71	121000000	1	41813	200716_dc_IP79_NormalLung-W6Ab_oldDDA-OTOT_25cmPepMap2uTT_145m_01.raw	1	1	P16403|H12_HUMAN:P10412|H14_HUMAN:P16402|H13_HUMAN				0
HLVYESDQNK	41.12	1231.58	10	-1.6	616.798	29.16	2290000	1	17196	200716_dc_IP79_NormalLung-W6Ab_oldDDA-OTOT_25cmPepMap2uTT_145m_01.raw	1	1	O43852|CALU_HUMAN				0
KVVNPLFEKRPK	41.08	1453.88	12	-0.7	485.633	33.41	7170000	1	20253	200716_dc_IP79_NormalLung-W6Ab_oldDDA-OTOT_25cmPepMap2uTT_145m_01.raw	1	1	P62424|RL7A_HUMAN				0
GSRPIDTSRLTK	41.08	1329.74	12	-0.9	444.252	32.04	25900000	1	19147	200716_dc_IP79_NormalLung-W6Ab_oldDDA-OTOT_25cmPepMap2uTT_145m_01.raw	2	2	Q04637|IF4G1_HUMAN				0
LPKKTESHHKA	41.07	1274.71	11	-0.1	638.362	12.31	13500000	1	5108	200716_dc_IP79_NormalLung-W6Ab_oldDDA-OTOT_25cmPepMap2uTT_145m_01.raw	2	2	P20671|H2A1D_HUMAN:P0C0S8|H2A1_HUMAN:P04908|H2A1B_HUMAN:Q93077|H2A1C_HUMAN:Q7L7L0|H2A3_HUMAN:Q6FI13|H2A2A_HUMAN:Q96KK5|H2A1H_HUMAN				0
YPNVNIHNF	41.05	1116.54	9	-0.2	559.275	65.53	133000000	1	43288	200716_dc_IP79_NormalLung-W6Ab_oldDDA-OTOT_25cmPepMap2uTT_145m_01.raw	1	1	Q01082|SPTB2_HUMAN				1
RAFLIEEQKIVVK	41.04	1571.94	13	-0.8	524.987	54.48	5070000	1	35236	200716_dc_IP79_NormalLung-W6Ab_oldDDA-OTOT_25cmPepMap2uTT_145m_01.raw	1	1	P49207|RL34_HUMAN				0
TGRVYNVTQHAVG	41.03	1400.72	13	-1.2	701.365	37.44	26900000	1	23084	200716_dc_IP79_NormalLung-W6Ab_oldDDA-OTOT_25cmPepMap2uTT_145m_01.raw	2	2	P46778|RL21_HUMAN				0
RFVNVVPTFGK	40.98	1262.71	11	-1	632.363	61.1	3130000	1	39860	200716_dc_IP79_NormalLung-W6Ab_oldDDA-OTOT_25cmPepMap2uTT_145m_01.raw	1	1	P62861|RS30_HUMAN				1
HPKTHVTHH	40.95	1092.56	9	0.8	365.193	11.26	3550000	1	4380	200716_dc_IP79_NormalLung-W6Ab_oldDDA-OTOT_25cmPepMap2uTT_145m_01.raw	2	2	Q29960|1C16_HUMAN:P04222|1C03_HUMAN:P30505|1C08_HUMAN:P30499|1C01_HUMAN:Q29963|1C06_HUMAN:Q9TNN7|1C05_HUMAN:P30508|1C12_HUMAN:Q07000|1C15_HUMAN:Q29865|1C18_HUMAN:P30510|1C14_HUMAN:P30504|1C04_HUMAN:P30501|1C02_HUMAN				0
HGDSDLQLERI	40.95	1281.63	11	-0.7	641.822	51.23	3580000	1	32939	200716_dc_IP79_NormalLung-W6Ab_oldDDA-OTOT_25cmPepMap2uTT_145m_01.raw	1	1	P68371|TBB4B_HUMAN:P04350|TBB4A_HUMAN:Q9BVA1|TBB2B_HUMAN:Q13885|TBB2A_HUMAN				1
IIGNSTLLRIIYK	40.94	1502.92	13	-0.7	501.98	77.34	2450000	1	51336	200716_dc_IP79_NormalLung-W6Ab_oldDDA-OTOT_25cmPepMap2uTT_145m_01.raw	1	1	P24530|EDNRB_HUMAN				0
HEVGWKYQA	40.93	1116.54	9	-1	559.274	39.33	100000000	1	24408	200716_dc_IP79_NormalLung-W6Ab_oldDDA-OTOT_25cmPepMap2uTT_145m_01.raw	2	2	P40429|RL13A_HUMAN				1
ARVITEEEKNFKA	40.89	1533.82	13	-0.7	512.279	38.55	4440000	1	23861	200716_dc_IP79_NormalLung-W6Ab_oldDDA-OTOT_25cmPepMap2uTT_145m_01.raw	1	1	P26373|RL13_HUMAN				0
SHYSGLKHEDK	40.89	1299.62	11	-1.4	434.214	21.19	8380000	1	11550	200716_dc_IP79_NormalLung-W6Ab_oldDDA-OTOT_25cmPepMap2uTT_145m_01.raw	2	2	Q8NC51|PAIRB_HUMAN				0
GTGASGSFKLNKK	40.86	1293.7	13	-0.9	647.859	26.75	39500000	1	15471	200716_dc_IP79_NormalLung-W6Ab_oldDDA-OTOT_25cmPepMap2uTT_145m_01.raw	2	2	P16403|H12_HUMAN:P10412|H14_HUMAN:P16402|H13_HUMAN:P16401|H15_HUMAN:Q02539|H11_HUMAN				0
SLGSALRPSTS	40.83	1074.57	11	-1	1075.57	44.26	314000000	1	27929	200716_dc_IP79_NormalLung-W6Ab_oldDDA-OTOT_25cmPepMap2uTT_145m_01.raw	2	2	P08670|VIME_HUMAN				1
YELGRPAANTK	40.82	1218.64	11	-0.8	610.325	33.56	33000000	1	20293	200716_dc_IP79_NormalLung-W6Ab_oldDDA-OTOT_25cmPepMap2uTT_145m_01.raw	2	2	P62241|RS8_HUMAN				0
VSSSTNPFRPQK	40.81	1346.69	12	-1.3	674.354	34.99	67500000	1	21250	200716_dc_IP79_NormalLung-W6Ab_oldDDA-OTOT_25cmPepMap2uTT_145m_01.raw	2	2	P63218|GBG5_HUMAN				1
NPAENFRVL	40.8	1058.55	9	0.4	1059.56	61.78	42700000	1	40278	200716_dc_IP79_NormalLung-W6Ab_oldDDA-OTOT_25cmPepMap2uTT_145m_01.raw	2	2	P13010|XRCC5_HUMAN				1
AKKPAAATVTKK	40.8	1212.76	12	-0.3	405.259	15.27	34300000	1	6874	200716_dc_IP79_NormalLung-W6Ab_oldDDA-OTOT_25cmPepMap2uTT_145m_01.raw	1	1	P16403|H12_HUMAN				0
TVGM(+15.99)NFKTPRGPV	40.77	1418.73	13	-0.1	710.374	45.28	64900000	1	28630	200716_dc_IP79_NormalLung-W6Ab_oldDDA-OTOT_25cmPepMap2uTT_145m_01.raw	2	2	P08708|RS17_HUMAN	Oxidation (M)	M4:Oxidation (M):1000.00		0
SLVSKGTLVQT	40.76	1131.65	11	-0.8	1132.66	50	111000000	1	32024	200716_dc_IP79_NormalLung-W6Ab_oldDDA-OTOT_25cmPepMap2uTT_145m_01.raw	2	2	P16403|H12_HUMAN:P10412|H14_HUMAN:P16402|H13_HUMAN:P16401|H15_HUMAN:Q02539|H11_HUMAN				1
SSSTNPFRPQK	40.76	1247.63	11	-0.8	624.82	30.67	25600000	1	18143	200716_dc_IP79_NormalLung-W6Ab_oldDDA-OTOT_25cmPepMap2uTT_145m_01.raw	2	2	P63218|GBG5_HUMAN				1
HFELGGDKKR	40.73	1185.63	10	-1.5	396.215	25.54	60600000	1	14541	200716_dc_IP79_NormalLung-W6Ab_oldDDA-OTOT_25cmPepMap2uTT_145m_01.raw	1	1	Q969Q0|RL36L_HUMAN:P83881|RL36A_HUMAN				1
VTQHAVGIVVNK	40.7	1263.73	12	0.5	422.251	36.53	0	1	22466	200716_dc_IP79_NormalLung-W6Ab_oldDDA-OTOT_25cmPepMap2uTT_145m_01.raw	0	0	P46778|RL21_HUMAN				0
SKGQESFKKQEK	40.7	1422.75	12	-0.4	712.38	15.17	28100000	1	7110	200716_dc_IP79_NormalLung-W6Ab_oldDDA-OTOT_25cmPepMap2uTT_145m_01.raw	3	3	P06748|NPM_HUMAN				0
KAKKPAAAAGAK	40.7	1110.69	12	0.4	371.236	11.35	37200000	1	4311	200716_dc_IP79_NormalLung-W6Ab_oldDDA-OTOT_25cmPepMap2uTT_145m_01.raw	2	2	P10412|H14_HUMAN				1
TETQEKNPLPSK	40.68	1370.7	12	-1	457.908	30.13	7050000	1	17866	200716_dc_IP79_NormalLung-W6Ab_oldDDA-OTOT_25cmPepMap2uTT_145m_01.raw	1	1	P62328|TYB4_HUMAN				1
EEMNYIKDVRA	40.68	1366.65	11	-0.7	684.334	51.68	20400000	1	33168	200716_dc_IP79_NormalLung-W6Ab_oldDDA-OTOT_25cmPepMap2uTT_145m_01.raw	2	2	P0CAP1|MYZAP_HUMAN				0
IPNASQAESKVF	40.67	1289.66	12	-1	645.837	57.69	2850000	1	37488	200716_dc_IP79_NormalLung-W6Ab_oldDDA-OTOT_25cmPepMap2uTT_145m_01.raw	1	1	P63104|1433Z_HUMAN				0
SPFKVSPLTFGR	40.66	1334.73	12	-1.6	445.918	67.05	4930000	1	44174	200716_dc_IP79_NormalLung-W6Ab_oldDDA-OTOT_25cmPepMap2uTT_145m_01.raw	1	1	O95810|CAVN2_HUMAN				0
FNADEFEDM(+15.99)VAEK	40.65	1559.64	13	-1.9	780.828	67.99	3470000	1	44812	200716_dc_IP79_NormalLung-W6Ab_oldDDA-OTOT_25cmPepMap2uTT_145m_01.raw	2	2	P27635|RL10_HUMAN	Oxidation (M)	M9:Oxidation (M):1000.00		0
SPNQARAQAAL	40.62	1125.59	11	-1.5	563.801	34.2	38800000	1	20734	200716_dc_IP79_NormalLung-W6Ab_oldDDA-OTOT_25cmPepMap2uTT_145m_01.raw	1	1	P26599|PTBP1_HUMAN				1
TPVKKKAR	40.58	926.602	8	-0.6	464.308	9.72	2640000	1	3226	200716_dc_IP79_NormalLung-W6Ab_oldDDA-OTOT_25cmPepMap2uTT_145m_01.raw	1	1	P10412|H14_HUMAN				0
TNTSAPDLKNVR	40.57	1314.69	12	-0.9	439.237	35.82	23000000	1	21893	200716_dc_IP79_NormalLung-W6Ab_oldDDA-OTOT_25cmPepMap2uTT_145m_01.raw	1	1	P27816|MAP4_HUMAN				0
VSKGTLVQTK	40.56	1059.63	10	-1.1	530.821	38.89	155000000	1	24094	200716_dc_IP79_NormalLung-W6Ab_oldDDA-OTOT_25cmPepMap2uTT_145m_01.raw	3	3	P16403|H12_HUMAN:P10412|H14_HUMAN:P16402|H13_HUMAN:P16401|H15_HUMAN:Q02539|H11_HUMAN				1
APKSPAKAKAV	40.55	1066.65	11	-0.2	356.557	24.3	28600000	1	13587	200716_dc_IP79_NormalLung-W6Ab_oldDDA-OTOT_25cmPepMap2uTT_145m_01.raw	1	1	P10412|H14_HUMAN				0
HGLGHGHEQQHG	40.5	1292.58	12	0	431.866	14.22	701000	1	6466	200716_dc_IP79_NormalLung-W6Ab_oldDDA-OTOT_25cmPepMap2uTT_145m_01.raw	1	1	P01042|KNG1_HUMAN				0
TPRPFGSQTR	40.49	1145.59	10	-0.7	382.872	29.93	5040000	1	17759	200716_dc_IP79_NormalLung-W6Ab_oldDDA-OTOT_25cmPepMap2uTT_145m_01.raw	1	1	Q8WWI1|LMO7_HUMAN				0
SSYSKQFTSST	40.49	1221.55	11	-1.3	611.782	38.46	1820000	1	23851	200716_dc_IP79_NormalLung-W6Ab_oldDDA-OTOT_25cmPepMap2uTT_145m_01.raw	1	1	P02671|FIBA_HUMAN				1
FVNVVPTFGK	40.45	1106.61	10	-4	554.311	71.88	0	1	47537	200716_dc_IP79_NormalLung-W6Ab_oldDDA-OTOT_25cmPepMap2uTT_145m_01.raw	0	0	P62861|RS30_HUMAN				1
TISPLDLAKLNQ	40.44	1311.74	12	-0.9	656.876	80.06	4110000	1	53288	200716_dc_IP79_NormalLung-W6Ab_oldDDA-OTOT_25cmPepMap2uTT_145m_01.raw	1	1	Q15365|PCBP1_HUMAN				1
TVKAKPVKASKPK	40.42	1380.88	13	0	461.301	15.89	45100000	1	7831	200716_dc_IP79_NormalLung-W6Ab_oldDDA-OTOT_25cmPepMap2uTT_145m_01.raw	2	2	P07305|H10_HUMAN				0
MPKMKMPKF	40.42	1136.59	9	-0.7	569.302	51.04	22500000	1	32811	200716_dc_IP79_NormalLung-W6Ab_oldDDA-OTOT_25cmPepMap2uTT_145m_01.raw	2	2	Q09666|AHNK_HUMAN				1
SGPYGGGGQY	40.41	941.388	10	-0.3	942.395	45.28	14900000	1	28622	200716_dc_IP79_NormalLung-W6Ab_oldDDA-OTOT_25cmPepMap2uTT_145m_01.raw	1	1	P09651|ROA1_HUMAN:Q32P51|RA1L2_HUMAN				1
APRPSTGPHKL	40.4	1159.65	11	-0.4	387.556	25.93	27400000	1	14806	200716_dc_IP79_NormalLung-W6Ab_oldDDA-OTOT_25cmPepMap2uTT_145m_01.raw	1	1	P22090|RS4Y1_HUMAN:P62701|RS4X_HUMAN:Q8TD47|RS4Y2_HUMAN				1
YLQIQSPAGQS	40.35	1190.59	11	-0.6	1191.6	62.08	1750000	1	40584	200716_dc_IP79_NormalLung-W6Ab_oldDDA-OTOT_25cmPepMap2uTT_145m_01.raw	1	1	P08311|CATG_HUMAN				0
Q(-17.03)EQSFVIRA	40.34	1059.53	9	-0.3	1060.54	74.58	6940000	1	49421	200716_dc_IP79_NormalLung-W6Ab_oldDDA-OTOT_25cmPepMap2uTT_145m_01.raw	2	2	P05107|ITB2_HUMAN	Pyro-glu from Q	Q1:Pyro-glu from Q:1000.00		0
NPKEFYHEV	40.3	1161.55	9	-0.7	581.78	40.05	9650000	1	24965	200716_dc_IP79_NormalLung-W6Ab_oldDDA-OTOT_25cmPepMap2uTT_145m_01.raw	1	1	Q6P2Q9|PRP8_HUMAN				1
AEHPKTHVT	40.28	1018.52	9	-0.4	1019.53	16.67	39000000	1	8178	200716_dc_IP79_NormalLung-W6Ab_oldDDA-OTOT_25cmPepMap2uTT_145m_01.raw	2	2	Q29960|1C16_HUMAN:P04222|1C03_HUMAN:P30505|1C08_HUMAN:P30499|1C01_HUMAN:Q29963|1C06_HUMAN:Q9TNN7|1C05_HUMAN:P30508|1C12_HUMAN:Q07000|1C15_HUMAN:Q29865|1C18_HUMAN:P30510|1C14_HUMAN:P30504|1C04_HUMAN:P30501|1C02_HUMAN				1
SSTNPFRPQK	40.23	1160.59	10	-0.5	581.304	30.42	53300000	1	18006	200716_dc_IP79_NormalLung-W6Ab_oldDDA-OTOT_25cmPepMap2uTT_145m_01.raw	2	2	P63218|GBG5_HUMAN				1
TVINQTQKENLR	40.22	1442.78	12	-0.7	722.399	32.88	265000000	1	19783	200716_dc_IP79_NormalLung-W6Ab_oldDDA-OTOT_25cmPepMap2uTT_145m_01.raw	2	2	P42766|RL35_HUMAN				1
RLVTTGVLKQTKG	40.2	1399.85	13	-0.7	467.624	33.52	2690000	1	20334	200716_dc_IP79_NormalLung-W6Ab_oldDDA-OTOT_25cmPepMap2uTT_145m_01.raw	1	1	P07305|H10_HUMAN				0
SVFPFESGKPFK	40.19	1368.71	12	-0.4	457.243	66.76	10500000	1	43817	200716_dc_IP79_NormalLung-W6Ab_oldDDA-OTOT_25cmPepMap2uTT_145m_01.raw	2	2	P17931|LEG3_HUMAN				1
VPNPRIKLIDF	40.17	1310.77	11	-1	656.392	70.37	8720000	1	46401	200716_dc_IP79_NormalLung-W6Ab_oldDDA-OTOT_25cmPepMap2uTT_145m_01.raw	1	1	O43293|DAPK3_HUMAN				0
HQIKQAVKK	40.14	1078.66	9	-0.5	540.338	14.22	10500000	1	6454	200716_dc_IP79_NormalLung-W6Ab_oldDDA-OTOT_25cmPepMap2uTT_145m_01.raw	2	2	P62750|RL23A_HUMAN				1
SDYPPLGR	40.14	903.445	8	-1	904.451	44.55	613000000	1	28006	200716_dc_IP79_NormalLung-W6Ab_oldDDA-OTOT_25cmPepMap2uTT_145m_01.raw	2	2	P68104|EF1A1_HUMAN:Q5VTE0|EF1A3_HUMAN				1
SFTPNQETQAQR	40.12	1405.66	12	-1	703.836	36.61	0	1	22525	200716_dc_IP79_NormalLung-W6Ab_oldDDA-OTOT_25cmPepMap2uTT_145m_01.raw	0	0	P41218|MNDA_HUMAN				0
RYTDVSTRYK	40.11	1287.66	10	-0.1	430.226	29.69	17200000	1	17557	200716_dc_IP79_NormalLung-W6Ab_oldDDA-OTOT_25cmPepMap2uTT_145m_01.raw	1	1	Q9Y320|TMX2_HUMAN				1
RVQKKTFTK	40.08	1134.69	9	-0.7	379.236	15.27	1160000	1	7229	200716_dc_IP79_NormalLung-W6Ab_oldDDA-OTOT_25cmPepMap2uTT_145m_01.raw	1	1	Q15149|PLEC_HUMAN:Q9UPN3|MACF1_HUMAN				1
SSPFKVSPLTFGR	40	1421.77	13	-0.6	474.929	68.48	11800000	1	45075	200716_dc_IP79_NormalLung-W6Ab_oldDDA-OTOT_25cmPepMap2uTT_145m_01.raw	2	2	O95810|CAVN2_HUMAN				0
KLEGHGLPANLPR	39.97	1400.79	13	-0.7	467.937	42.24	4330000	1	26535	200716_dc_IP79_NormalLung-W6Ab_oldDDA-OTOT_25cmPepMap2uTT_145m_01.raw	1	1	Q9NZN4|EHD2_HUMAN				0
GGPGTASRPSS	39.94	972.462	11	-1.3	973.468	25.78	131000000	1	14766	200716_dc_IP79_NormalLung-W6Ab_oldDDA-OTOT_25cmPepMap2uTT_145m_01.raw	2	2	P08670|VIME_HUMAN				1
TPPAVFDAKQL	39.93	1185.64	11	-0.4	593.827	64.74	52700000	1	42238	200716_dc_IP79_NormalLung-W6Ab_oldDDA-OTOT_25cmPepMap2uTT_145m_01.raw	1	1	P12429|ANXA3_HUMAN				0
APNPADGTPKVL	39.87	1178.63	12	0.6	590.322	51.68	3410000	1	33281	200716_dc_IP79_NormalLung-W6Ab_oldDDA-OTOT_25cmPepMap2uTT_145m_01.raw	1	1	P17861|XBP1_HUMAN				0
TGQWHSESGSFRP	39.85	1474.66	13	0.5	738.337	43.08	16400000	1	27236	200716_dc_IP79_NormalLung-W6Ab_oldDDA-OTOT_25cmPepMap2uTT_145m_01.raw	2	2	P02671|FIBA_HUMAN				0
STSYNRGDSTFES	39.85	1449.6	13	-1.5	725.807	40.44	2930000	1	25276	200716_dc_IP79_NormalLung-W6Ab_oldDDA-OTOT_25cmPepMap2uTT_145m_01.raw	1	1	P02671|FIBA_HUMAN				1
TPQGPPEIY	39.81	1000.49	9	-1.3	1001.49	63.12	1610000	1	41320	200716_dc_IP79_NormalLung-W6Ab_oldDDA-OTOT_25cmPepMap2uTT_145m_01.raw	1	1	Q9UKY7|CDV3_HUMAN				0
TLPTKETIEQEKR	39.8	1571.85	13	-0.5	524.958	34.84	67700000	1	21296	200716_dc_IP79_NormalLung-W6Ab_oldDDA-OTOT_25cmPepMap2uTT_145m_01.raw	3	3	P63313|TYB10_HUMAN				1
AVVVKKIETRDGK	39.76	1441.86	13	0.2	361.473	26.37	8380000	1	15178	200716_dc_IP79_NormalLung-W6Ab_oldDDA-OTOT_25cmPepMap2uTT_145m_01.raw	2	2	P05787|K2C8_HUMAN				0
NPKILKQSM	39.74	1057.6	9	0.2	529.805	33.66	2540000	1	20439	200716_dc_IP79_NormalLung-W6Ab_oldDDA-OTOT_25cmPepMap2uTT_145m_01.raw	1	1	P05412|JUN_HUMAN				0
HFGFPSDNSGKER	39.73	1476.67	13	-0.2	493.232	36.94	0	1	22760	200716_dc_IP79_NormalLung-W6Ab_oldDDA-OTOT_25cmPepMap2uTT_145m_01.raw	0	0	Q8TB73|NDNF_HUMAN				0
TGPPVSELITKA	39.72	1211.68	12	-1.2	606.845	64.89	27900000	1	42419	200716_dc_IP79_NormalLung-W6Ab_oldDDA-OTOT_25cmPepMap2uTT_145m_01.raw	1	1	P16401|H15_HUMAN				0
KATGAATPK	39.7	843.481	9	-0.6	844.488	13.41	22600000	1	5862	200716_dc_IP79_NormalLung-W6Ab_oldDDA-OTOT_25cmPepMap2uTT_145m_01.raw	2	2	P10412|H14_HUMAN				1
SPKGKFSLF	39.65	1009.56	9	-1.4	1010.57	53.4	227000000	1	34498	200716_dc_IP79_NormalLung-W6Ab_oldDDA-OTOT_25cmPepMap2uTT_145m_01.raw	2	2	Q09666|AHNK_HUMAN				1
GTGASGSFK	39.63	810.387	9	-0.6	811.394	26.17	95800000	1	15036	200716_dc_IP79_NormalLung-W6Ab_oldDDA-OTOT_25cmPepMap2uTT_145m_01.raw	2	2	P16403|H12_HUMAN:P10412|H14_HUMAN:P16402|H13_HUMAN:P16401|H15_HUMAN:Q02539|H11_HUMAN:P22492|H1T_HUMAN				1
FGGPGTASRPSSS	39.63	1206.56	13	-0.6	604.288	33.85	230000000	1	20697	200716_dc_IP79_NormalLung-W6Ab_oldDDA-OTOT_25cmPepMap2uTT_145m_01.raw	2	2	P08670|VIME_HUMAN				1
RPKTHVTHH	39.59	1111.6	9	0.6	371.541	11.69	3390000	1	4701	200716_dc_IP79_NormalLung-W6Ab_oldDDA-OTOT_25cmPepMap2uTT_145m_01.raw	2	2	Q95604|1C17_HUMAN				0
TPSGTNVGSSGR	39.59	1118.53	12	-1.1	560.273	27.18	11300000	1	15723	200716_dc_IP79_NormalLung-W6Ab_oldDDA-OTOT_25cmPepMap2uTT_145m_01.raw	1	1	P60468|SC61B_HUMAN				0
SHTKPYVRSK	39.58	1201.66	10	-0.6	401.559	15.79	1270000	1	7563	200716_dc_IP79_NormalLung-W6Ab_oldDDA-OTOT_25cmPepMap2uTT_145m_01.raw	1	1	Q07020|RL18_HUMAN				0
HGDSDLQLDRI	39.55	1267.62	11	0.4	634.815	52.47	3840000	1	33798	200716_dc_IP79_NormalLung-W6Ab_oldDDA-OTOT_25cmPepMap2uTT_145m_01.raw	1	1	P07437|TBB5_HUMAN				1
SGVSLAALKKAL	39.54	1156.72	12	-1.7	579.365	65.78	2500000	1	43278	200716_dc_IP79_NormalLung-W6Ab_oldDDA-OTOT_25cmPepMap2uTT_145m_01.raw	1	1	P16403|H12_HUMAN:P10412|H14_HUMAN:P16402|H13_HUMAN				0
SIRDTPAKNAQK	39.52	1327.72	12	-1.3	443.58	24.7	27600000	1	13919	200716_dc_IP79_NormalLung-W6Ab_oldDDA-OTOT_25cmPepMap2uTT_145m_01.raw	1	1	P06748|NPM_HUMAN				1
KSSAEVIAQARKK	39.52	1414.83	13	-0.2	354.714	25.44	7770000	1	14514	200716_dc_IP79_NormalLung-W6Ab_oldDDA-OTOT_25cmPepMap2uTT_145m_01.raw	2	2	Q16555|DPYL2_HUMAN				0
TDTTKFTGSHKER	39.52	1506.74	13	-1.7	503.254	24.99	4310000	1	14186	200716_dc_IP79_NormalLung-W6Ab_oldDDA-OTOT_25cmPepMap2uTT_145m_01.raw	1	1	O94811|TPPP_HUMAN				0
AFLIEEQKIVVK	39.5	1415.84	12	-0.9	708.926	63.9	2200000	1	41959	200716_dc_IP79_NormalLung-W6Ab_oldDDA-OTOT_25cmPepMap2uTT_145m_01.raw	1	1	P49207|RL34_HUMAN				1
FMGKVVNPTQK	39.47	1247.67	11	0.9	416.897	39.04	10500000	1	24212	200716_dc_IP79_NormalLung-W6Ab_oldDDA-OTOT_25cmPepMap2uTT_145m_01.raw	1	1	P01009|A1AT_HUMAN				0
TPSLVKSTSQL	39.45	1159.64	11	-0.5	580.829	51.18	43300000	1	32794	200716_dc_IP79_NormalLung-W6Ab_oldDDA-OTOT_25cmPepMap2uTT_145m_01.raw	2	2	Q06055|AT5G2_HUMAN				1
RLKQIEEQTK	39.44	1271.72	10	-0.8	636.867	25.93	52300000	1	14853	200716_dc_IP79_NormalLung-W6Ab_oldDDA-OTOT_25cmPepMap2uTT_145m_01.raw	2	2	P26038|MOES_HUMAN				0
TSN(+.98)HQKISSGK	39.43	1186.59	11	-0.3	594.304	13.98	3470000	1	6304	200716_dc_IP79_NormalLung-W6Ab_oldDDA-OTOT_25cmPepMap2uTT_145m_01.raw	2	2	O95810|CAVN2_HUMAN	Deamidation (NQ)	N3:Deamidation (NQ):39.76		0
TGPPVSELITK	39.42	1140.64	11	0.2	571.327	57.94	472000000	1	37638	200716_dc_IP79_NormalLung-W6Ab_oldDDA-OTOT_25cmPepMap2uTT_145m_01.raw	1	1	P16401|H15_HUMAN				0
APSLFHLNTL	39.41	1111.6	10	-1.1	556.808	80.7	54700000	1	53949	200716_dc_IP79_NormalLung-W6Ab_oldDDA-OTOT_25cmPepMap2uTT_145m_01.raw	1	1	Q96QB1|RHG07_HUMAN				1
TKKNKEEAAEYAK	39.4	1508.78	13	-1	503.935	21.73	14000000	1	11829	200716_dc_IP79_NormalLung-W6Ab_oldDDA-OTOT_25cmPepMap2uTT_145m_01.raw	2	2	P62753|RS6_HUMAN				0
HEVGWKYQ	39.4	1045.5	8	-1.8	523.755	37.07	16900000	1	22858	200716_dc_IP79_NormalLung-W6Ab_oldDDA-OTOT_25cmPepMap2uTT_145m_01.raw	1	1	P40429|RL13A_HUMAN				1
TPNHVEHTL	39.39	1046.51	9	-0.7	524.264	28.54	3560000	1	16714	200716_dc_IP79_NormalLung-W6Ab_oldDDA-OTOT_25cmPepMap2uTT_145m_01.raw	1	1	Q9HBL0|TENS1_HUMAN				1
HC(+119.00)TGQVKVY	39.38	1152.51	9	-0.3	577.26	28.59	38000000	1	16763	200716_dc_IP79_NormalLung-W6Ab_oldDDA-OTOT_25cmPepMap2uTT_145m_01.raw	2	2	Q99814|EPAS1_HUMAN	Cysteinylation	C2:Cysteinylation:1000.00		0
STGGKAPRKQ	39.38	1028.57	10	-0.9	515.293	9.1	3990000	1	2859	200716_dc_IP79_NormalLung-W6Ab_oldDDA-OTOT_25cmPepMap2uTT_145m_01.raw	1	1	Q71DI3|H32_HUMAN:P68431|H31_HUMAN:Q16695|H31T_HUMAN:P84243|H33_HUMAN:Q6NXT2|H3C_HUMAN				1
TVINQTQKENLRK	39.31	1570.88	13	0.4	524.634	28.15	51400000	1	16419	200716_dc_IP79_NormalLung-W6Ab_oldDDA-OTOT_25cmPepMap2uTT_145m_01.raw	1	1	P42766|RL35_HUMAN				1
HQTSAESWGTGRA	39.31	1386.63	13	-1.3	694.32	32.28	16700000	1	19401	200716_dc_IP79_NormalLung-W6Ab_oldDDA-OTOT_25cmPepMap2uTT_145m_01.raw	2	2	P36578|RL4_HUMAN				1
KAASGEAKPKVK	39.29	1212.72	12	-1.3	405.246	13.69	4190000	1	6037	200716_dc_IP79_NormalLung-W6Ab_oldDDA-OTOT_25cmPepMap2uTT_145m_01.raw	2	2	P16403|H12_HUMAN				0
SLYASSPGGVYAT	39.28	1271.6	13	-1.2	636.808	66.61	23300000	1	43755	200716_dc_IP79_NormalLung-W6Ab_oldDDA-OTOT_25cmPepMap2uTT_145m_01.raw	1	1	P08670|VIME_HUMAN				0
TLTAVHDAIL	39.27	1052.59	10	-1	1053.59	62.77	39300000	1	41175	200716_dc_IP79_NormalLung-W6Ab_oldDDA-OTOT_25cmPepMap2uTT_145m_01.raw	2	2	P62081|RS7_HUMAN				1
TNVKAAWGK	39.27	973.534	9	-0.8	487.774	29.89	14100000	1	17700	200716_dc_IP79_NormalLung-W6Ab_oldDDA-OTOT_25cmPepMap2uTT_145m_01.raw	1	1	P69905|HBA_HUMAN				0
SLTSN(+.98)HQKISSGK	39.23	1386.71	13	-0.1	463.244	26.17	23400000	1	15020	200716_dc_IP79_NormalLung-W6Ab_oldDDA-OTOT_25cmPepMap2uTT_145m_01.raw	2	2	O95810|CAVN2_HUMAN	Deamidation (NQ)	N5:Deamidation (NQ):32.28		0
VEFENPDEAEK	39.21	1305.57	11	-1.1	653.793	46.85	2920000	1	29827	200716_dc_IP79_NormalLung-W6Ab_oldDDA-OTOT_25cmPepMap2uTT_145m_01.raw	1	1	Q15287|RNPS1_HUMAN				0
RGDSPASSKP	39.19	1000.49	10	-1.2	1001.5	24.24	2340000000	1	13570	200716_dc_IP79_NormalLung-W6Ab_oldDDA-OTOT_25cmPepMap2uTT_145m_01.raw	2	2	P02751|FINC_HUMAN				0
TFNPGAGLPTDK	39.19	1216.61	12	-3	609.31	55.37	35500000	1	36109	200716_dc_IP79_NormalLung-W6Ab_oldDDA-OTOT_25cmPepMap2uTT_145m_01.raw	2	2	P09661|RU2A_HUMAN				1
TTAEGMAKKVTK	39.19	1263.69	12	0.7	422.236	27.91	9850000	1	16240	200716_dc_IP79_NormalLung-W6Ab_oldDDA-OTOT_25cmPepMap2uTT_145m_01.raw	1	1	Q92522|H1X_HUMAN				1
LPKYGVKVGL	39.18	1072.66	10	-0.4	537.339	53.98	28000000	1	34735	200716_dc_IP79_NormalLung-W6Ab_oldDDA-OTOT_25cmPepMap2uTT_145m_01.raw	1	1	P46777|RL5_HUMAN				0
HYKGQQIGKVVQ	39.17	1383.76	12	-0.1	462.261	29.07	11100000	1	17095	200716_dc_IP79_NormalLung-W6Ab_oldDDA-OTOT_25cmPepMap2uTT_145m_01.raw	1	1	P61254|RL26_HUMAN:Q9UNX3|RL26L_HUMAN				1
HQPHKVTQYK	39.16	1264.67	10	-0.5	422.563	19.5	10400000	1	10155	200716_dc_IP79_NormalLung-W6Ab_oldDDA-OTOT_25cmPepMap2uTT_145m_01.raw	1	1	Q969Q0|RL36L_HUMAN:P83881|RL36A_HUMAN				1
HHTIGGSR	39.14	863.436	8	-0.9	864.443	13.88	26900000	1	6217	200716_dc_IP79_NormalLung-W6Ab_oldDDA-OTOT_25cmPepMap2uTT_145m_01.raw	2	2	P61313|RL15_HUMAN				1
SVTEHPSPSPL	39.14	1149.57	11	-0.4	575.79	44.31	8560000	1	27958	200716_dc_IP79_NormalLung-W6Ab_oldDDA-OTOT_25cmPepMap2uTT_145m_01.raw	1	1	P07910|HNRPC_HUMAN				1
FGGGGSYNDFGNY	39.12	1353.53	13	-1.4	677.769	77.24	11800000	1	51235	200716_dc_IP79_NormalLung-W6Ab_oldDDA-OTOT_25cmPepMap2uTT_145m_01.raw	1	1	P09651|ROA1_HUMAN:Q32P51|RA1L2_HUMAN				0
DISSALRVNPAL	39.11	1254.69	12	0.3	628.354	80.65	3400000	1	53664	200716_dc_IP79_NormalLung-W6Ab_oldDDA-OTOT_25cmPepMap2uTT_145m_01.raw	1	1	P13489|RINI_HUMAN				0
Q(-17.03)TVAVGVIKAVDK	39.11	1309.76	13	-0.3	655.887	69.87	10200000	1	46085	200716_dc_IP79_NormalLung-W6Ab_oldDDA-OTOT_25cmPepMap2uTT_145m_01.raw	1	1	P68104|EF1A1_HUMAN:Q5VTE0|EF1A3_HUMAN	Pyro-glu from Q	Q1:Pyro-glu from Q:1000.00		0
SAKPAPPKPEPKP	39.11	1342.76	13	-0.5	448.594	26.89	7210000	1	15513	200716_dc_IP79_NormalLung-W6Ab_oldDDA-OTOT_25cmPepMap2uTT_145m_01.raw	1	1	P05204|HMGN2_HUMAN:Q15651|HMGN3_HUMAN				0
TRLGNDFHTNK	39.1	1301.65	11	-0.4	434.89	28.11	24200000	1	16371	200716_dc_IP79_NormalLung-W6Ab_oldDDA-OTOT_25cmPepMap2uTT_145m_01.raw	1	1	P08708|RS17_HUMAN				1
[truncated: 6,841 more rows]

## Sheet: normal80_z state
Peptide	-10lgP	Mass	Length	ppm	m/z	RT	Area Sample 1	Fraction	Scan	Source File	#Feature	#Feature Sample 1	Accession	PTM	AScore		IEDB
[truncated: 7,602 more rows]

## Sheet: normal80_original
Peptide	-10lgP	Mass	Length	ppm	m/z	RT	Area Sample 1	Fraction	Scan	Source File	#Feature	#Feature Sample 1	Accession	PTM	AScore		IEDB
[truncated: 7,028 more rows]

[truncated: 4 more sheets: NSCLC81_z state, NSCLC81_original, NSCLC82_z state, NSCLC82_original]
